# Supplementary material
Source: PubMed Central journal article supplement (PMC4094262)
Supplement: ml500114p_si_001.pdf [file ml500114p_si_001.pdf]

## Supporting Information

### A chemically accessible Hsp 90 inhibitor that does not cause induction of the heat shock response

Yen Chin Koay<sup>a</sup>, Jeanette R. McConnell<sup>a</sup>, Yao Wang<sup>a</sup>, Seong Jong Kim<sup>a</sup>, Laura Buckton<sup>a</sup>, Flora Mansour<sup>a</sup> and Shelli R. McAlpine<sup>a\*</sup>

<sup>a</sup>School of Chemistry, The University of New South Wales, Kensington, NSW 2052 Australia.

\*Corresponding author Email: [s.mcalpine@unsw.edu.au](mailto:s.mcalpine@unsw.edu.au)

## Contents

|                                                                                                            |          |
|------------------------------------------------------------------------------------------------------------|----------|
| <b>Chemistry: Synthesis and experimental procedure</b>                                                     | <b>3</b> |
| <i><sup>1</sup>HNMR, <sup>13</sup>CNMR, 2D NMR Spectra for new compounds</i>                               | 20       |
| <i>Compound 1: LCMS of DDLP HO-Leu-N-Me-Val-D-Leu-D-Phe-3,3-Diphenyl-D-Ala-NH<sub>2</sub></i>              | 20       |
| <i>Compound 1: <sup>1</sup>HNMR of DDLP HO-Leu-N-Me-Val-D-Leu-D-Phe-3,3-Diphenyl-D-Ala-NH<sub>2</sub></i>  | 21       |
| <i>Compound 1: LCMS of cyclo-Leu-N-Me-Val-D-Leu-D-Phe-3,3-Diphenyl-D-Ala</i>                               | 22       |
| <i>Compound 1: HRMS of cyclo-Leu-N-Me-Val-D-Leu-D-Phe-3,3-Diphenyl-D-Ala</i>                               | 23       |
| <i>Compound 1: <sup>1</sup>HNMR of cyclo-Leu-N-Me-Val-D-Leu-D-Phe-3,3-Diphenyl-D-Ala</i>                   | 24       |
| <i>Compound 1: <sup>13</sup>CNMR of cyclo-Leu-N-Me-Val-D-Leu-D-Phe-3,3-Diphenyl-D-Ala</i>                  | 25       |
| <i>Compound 1: <sup>1</sup>H-<sup>13</sup>C HSQC of cyclo-Leu-N-Me-Val-D-Leu-D-Phe-3,3-Diphenyl-D-Ala</i>  | 26       |
| <i>Compound 1: <sup>1</sup>H-<sup>13</sup>C HMBC of cyclo-Leu-N-Me-Val-D-Leu-D-Phe-3,3-Diphenyl-D-Ala</i>  | 27       |
| <i>Compound 1-tag: LCMS of DDLP 1-TagII</i>                                                                | 28       |
| <i>Compound 1-tag: <sup>1</sup>HNMR DDLP 1-TagII</i>                                                       | 29       |
| <i>Compound 1-tag: LCMS of Macrocyclic 1-TagII</i>                                                         | 30       |
| <i>Compound 1-tag: <sup>1</sup>HNMR Macrocyclic 1-TagII</i>                                                | 31       |
| <i>Compound 1-tag: LCMS of Boc-deprotected Macrocyclic 1-TagII</i>                                         | 32       |
| <i>Compound 1-tag: LCMS of Macrocyclic 1-Biotinylated tag</i>                                              | 33       |
| <i>Compound 1-tag: HRMS of Macrocyclic 1-Biotinylated tag</i>                                              | 34       |
| <i>Compound 1-tag: <sup>1</sup>HNMR Macrocyclic 1-Biotinylated tag</i>                                     | 35       |
| <i>Compound 1-tag: <sup>13</sup>CNMR Macrocyclic 1-Biotinylated tag</i>                                    | 36       |
| <i>Compound 1-tag: <sup>1</sup>H-<sup>13</sup>C HSQC Macrocyclic 1-Biotinylated tag</i>                    | 37       |
| <i>Compound 1-tag: <sup>1</sup>H-<sup>13</sup>C HMBC Macrocyclic 1-Biotinylated tag</i>                    | 38       |
| <i>Compound 2: LCMS of DDLP HO-Leu-N-Me-Val-D-Leu-D-3-(2-Pyridyl)Ala-3,3-Diphenyl-D-Ala-NH<sub>2</sub></i> | 39       |
| <i>Compound 2: LCMS of cyclo-Leu-N-Me-Val-D-Leu-D-3-(2-Pyridyl)Ala-3,3-Diphenyl-D-Ala</i>                  | 40       |
| <i>Compound 2: <sup>1</sup>HNMR of cyclo-Leu-N-Me-Val-D-Leu-D-3-(2-Pyridyl)Ala-3,3-Diphenyl-D-Ala</i>      | 41       |
| <i>Compound 3: LCMS of DDLP HO-Leu-N-Me-Val-D-Leu-D-3-(3-Pyridyl)Ala-3,3-Diphenyl-D-Ala-NH<sub>2</sub></i> | 42       |
| <i>Compound 3: LCMS of cyclo-Leu-N-Me-Val-D-Leu-D-3-(3-Pyridyl)Ala-3,3-Diphenyl-D-Ala</i>                  | 43       |

|                                                                                                                         |    |
|-------------------------------------------------------------------------------------------------------------------------|----|
| <i>Compound 3: <sup>1</sup>HNMR of cyclo-Leu-N-Me-Val-D-Leu-D-3-(3-Pyridyl)Ala-3,3-Diphenyl-D-Ala</i>                   | 44 |
| <i>Compound 4: LCMS of DDLP HO-Leu-N-Me-Val- D-Leu-D-3-(4-Pyridyl)Ala-3,3-Diphenyl-D-Ala-NH<sub>2</sub></i>             | 45 |
| <i>Compound 4: LCMS of cyclo-Leu-N-Me-Val-D-Leu-D-3-(4-Pyridyl)Ala-3,3-Diphenyl-D-Ala</i>                               | 46 |
| <i>Compound 4: <sup>1</sup>HNMR of cyclo-Leu-N-Me-Val-D-Leu-D-3-(4-Pyridyl)Ala-3,3-Diphenyl-D-Ala</i>                   | 47 |
| <i>Compound 5: LCMS of DDLP HO-Leu-N-Me-Val-D-Leu-D-Trp(Boc)-3,3- Diphenyl-D-Ala-NH<sub>2</sub></i>                     | 48 |
| <i>Compound 5: LCMS of cyclo-Leu-N-Me-Val-D-Leu-D-Trp(Boc)-3,3-Diphenyl-D-Ala</i>                                       | 49 |
| <i>Compound 5: <sup>1</sup>HNMR of cyclo-Leu-N-Me-Val-D-Leu-D-Trp(Boc)-3,3-Diphenyl-D-Ala</i>                           | 50 |
| <i>Compound 6: LCMS of DDLP HO-Leu-N-Me-Val-D-Leu-D-Tyr(Me)-3,3-Diphenyl-D-Ala-NH<sub>2</sub></i>                       | 51 |
| <i>Compound 6: LCMS of cyclo-Leu-N-Me-Val-D-Leu-D-Tyr(Me)-3,3-Diphenyl-D-Ala</i>                                        | 52 |
| <i>Compound 6: <sup>1</sup>HNMR of cyclo-Leu-N-Me-Val-D-Leu-D-Tyr(Me)-3,3-Diphenyl-D-Ala</i>                            | 53 |
| <i>Compound 7: LCMS of DDLP HO-Leu-N-Me-Val-D-Leu-D-3-(4-Thiazoyl)Ala-3,3-Diphenyl-D-Ala-NH<sub>2</sub></i>             | 54 |
| <i>Compound 7: <sup>1</sup>HNMR of DDLP HO-Leu-N-Me-Val-D-Leu-D-3-(4-Thiazoyl)Ala-3,3-Diphenyl-D-Ala-NH<sub>2</sub></i> | 55 |
| <i>Compound 7: LCMS of cyclo-Leu-N-Me-Val-D-Leu-D-3-(4-Thiazoyl)Ala-3,3-Diphenyl-D-Ala</i>                              | 56 |
| <i>Compound 7: HRMS of cyclo-Leu-N-Me-Val-D-Leu-D-3-(4-Thiazoyl)Ala-3,3-Diphenyl-D-Ala</i>                              | 57 |
| <i>Compound 7: <sup>1</sup>HNMR of cyclo-Leu-N-Me-Val-D-Leu-D-3-(4-Thiazoyl)Ala-3,3-Diphenyl-D-Ala</i>                  | 58 |
| <i>Compound 7: <sup>13</sup>CNMR of cyclo-Leu-N-Me-Val-D-Leu-D-3-(4-Thiazoyl)Ala-3,3-Diphenyl-D-Ala</i>                 | 59 |
| <i>Compound 7: <sup>1</sup>H-<sup>13</sup>C HSQC of cyclo-Leu-N-Me-Val-D-Leu-D-3-(4-Thiazoyl)Ala-3,3-Diphenyl-D-Ala</i> | 60 |
| <i>Compound 7: <sup>1</sup>H-<sup>13</sup>C HMBC of cyclo-Leu-N-Me-Val-D-Leu-D-3-(4-Thiazoyl)Ala-3,3-Diphenyl-D-Ala</i> | 61 |
| <i>Compound 7-tag: LCMS of DDLP 7-TagII</i>                                                                             | 62 |
| <i>Compound 7-tag: <sup>1</sup>HNMR DDLP 7-TagII</i>                                                                    | 63 |
| <i>Compound 7-tag: LCMS of Macrocycle 7-TagII</i>                                                                       | 64 |
| <i>Compound 7-tag: <sup>1</sup>HNMR Macrocycle 7-TagII</i>                                                              | 65 |
| <i>Compound 7-tag: LCMS of Boc-deprotected Macrocycle 7-TagII</i>                                                       | 66 |
| <i>Compound 7-tag: LCMS of Macrocycle 7-Biotinylated tag</i>                                                            | 67 |
| <i>Compound 7-tag: HRMS of Macrocycle 7-Biotinylated tag</i>                                                            | 68 |
| <i>Compound 7-tag: <sup>1</sup>HNMR Macrocycle 7-Biotinylated tag</i>                                                   | 69 |
| <i>Compound 7-tag: <sup>13</sup>CNMR Macrocycle 7-Biotinylated tag</i>                                                  | 70 |
| <i>Compound 7-tag: <sup>1</sup>H-<sup>13</sup>C HSQC Macrocycle 7-Biotinylated tag</i>                                  | 71 |
| <i>Compound 7-tag: <sup>1</sup>H-<sup>13</sup>C HMBC Macrocycle 7-Biotinylated tag</i>                                  | 72 |

|                                                                                                       |            |
|-------------------------------------------------------------------------------------------------------|------------|
| <b>Biology: Methodology and Results</b>                                                               | <b>73</b>  |
| <i>Cell-cycle analysis</i>                                                                            | 73         |
| <i>Supplemental Figure S1</i>                                                                         | 73         |
| <i>Apoptosis analysis</i>                                                                             | 73         |
| <i>Supplemental Figure S2</i>                                                                         | 74         |
| <i>Caspase-3/7 induction assay</i>                                                                    | 75         |
| <i>Supplemental Figure S3</i>                                                                         | 75         |
| <i>In vitro</i> pulldown assays with 7-T-II (SM253) and 1-T-II in HCT-116 and MiaPaCa-2 cell lysates. | 75         |
| <i>Supplemental Figure S4</i>                                                                         | 76         |
| <i>Binding Assay</i>                                                                                  | 76         |
| <i>Supplemental Figure S5</i>                                                                         | 77         |
| <i>Cell Lysate Analysis</i>                                                                           | 77         |
| <i>Supplemental Figure S6</i>                                                                         | 78         |
| <i>Firefly luciferase refolding assay</i>                                                             | 78         |
| <i>Cell culture</i>                                                                                   | 78         |
| <i>Cytotoxicity Assay</i>                                                                             | 78         |
| <i>Supplemental Figure S7</i>                                                                         | 80         |
| <i>Supplemental Figure S8</i>                                                                         | 81         |
| <i>Supplemental Figure S9</i>                                                                         | 104        |
| <br>                                                                                                  |            |
| <b>List of abbreviations</b>                                                                          | <b>105</b> |

## **Chemistry: General solid phase peptide synthesis**

### **General Remarks**

All chemicals were purchased from commercial suppliers (Chem-Impex International, Peptide International and GL-Biochem) and used without further purification. All moisture sensitive reactions were performed under nitrogen gas and was monitored by thin-layer chromatography (TLC) and liquid-chromatography mass spectrometry (LC/MS). TLC was performed on aluminium silica gel sheets 250  $\mu\text{m}$  Whatman<sup>®</sup> (4861-820) using UV light ( $\lambda = 254 \text{ nm}$ ) as visualizing method. The developing agents for TLC include potassium permanganate (general purpose) and ninhydrin (for amine groups detection).

SiliCycle SiliaFlash silica gel (60  $\text{\AA}$ , particle size 40-63  $\mu\text{m}$ ) were used for flash chromatography.  $^1\text{H}$  and  $^{13}\text{C}$  NMR spectra were obtained and recorded at 25°C on Bruker Avance III 500 MHz and 600 MHz. Multiplicity of NMR signals were represented by the following abbreviations: s = singlet, d = doublet, t = triplet, q = quartet, p = pentet, m = multiplet, br = broad, dd = doublet of doublet.

High-resolution mass spectrometry (HRMS) analyses were recorded on a Thermo LTQ Orbitrap XL ESI/APCI with UPLC system at the Bioanalytical Mass Spectrometry Facility in Mark Wainwright Analytical Centre at the University of New South Wales.

LC/MS analyses were performed on Shimadzu Prominence High performance LCMS 2010EV system (Water Symmetry<sup>®</sup> C18 column, 3.5  $\mu\text{m}$ , 4.65x75 mm) connected to a Shimadzu LCMS 2010EV mass spectrometer. The mobile phase consist of DDI water with 0.1% (v/v) formic acid (solvent A), and HPLC grade acetonitrile with 0.1% (v/v) formic acid (solvent B) at a flow rate of 0.5 mL/min, starting at 70% solvent A, 30% solvent B.

Semi-preparative HPLC for purification was performed on Shimadzu Prominence High performance LCMS 2010EV system (Phenomenex<sup>®</sup> Jupiter C18 column, 4 $\mu\text{m}$ , 250x10 mm). The mobile phase was prepared by DDI water with 0.1% (v/v) formic acid (solvent A), and HPLC grade acetonitrile with 0.1% (v/v) formic acid (solvent B). The gradient elution were as follow: flow rate 2 mL/min; initial 70% solvent A, 30% solvent B hold for 35 min; at 35 min 100% solvent B hold for 18 min; at 53 min 70% solvent A, 30% solvent B hold for 7 min.

## **Synthesis: Experimental Procedures**

### **General solid phase peptide synthesis**

Stepwise solid phase peptide synthesis (SPPS) was performed in a polypropylene solid-phase extraction cartridge fitted with a 20  $\mu\text{m}$  polyethylene frit purchased from Applied Separations (Allentown, PA) and pre-loaded 2-chlorotriptyl resins with an approximately 0.5 mmol/g loading scale were used. The resin was weight, transferred to the cartridge and was swelled in DMF for 30 minutes prior to peptide coupling in the corresponding sequence.

### **General peptide coupling**

Couplings were performed in DMF solution at 0.2 M, consisting Fmoc protected amino acid (3.0 equivalents) and 1-hydroxybenzotriazole (3.0 equivalents) mixed with the resin. Diisopropylcarbodiimide was then added to activate the coupling process. Coupling was allowed to shake for a minimum of 2 hours on a shaker (Labquake tube shaker, Thermo Fisher Scientific) and checked via ninhydrin test to confirm competition. Upon completion, the coupling reaction solution was drained, and the resin was subjected to Fmoc removal. (Note: For the peptide coupling between Fmoc and *N*-methyl amino terminus, 1-hydroxybenzotriazole was replaced by 1-hydroxy-7-azabenzotriazole and the coupling process was allowed to run overnight).



## **General Fmoc removal**

After the peptide coupling process was completed, removal of Fmoc protecting group was performed according to the following steps: DMF wash (3 × 1 minute), 20% Piperidine/DMF (1 × 5 minutes), 20% Piperidine/DMF (1 × 10 minutes), DMF wash (2 × 1 minute), IPA wash (1 × 1 minute), DMF wash (1 × 1 minute), IPA (1 × 1 minute), DMF (3 × 1 minute). The complete removal of Fmoc group was verified via ninhydrin test. The resin was then ready for the next amino acid coupling.

## **General N-terminal solid phase amine deprotection**

Once the desired length of amino acid residue has been generated, the peptide-bound resin was treated for the final removal of the Fmoc group: DMF wash (3 × 1 minute), 20% Piperidine/DMF (1 × 5 minutes), 20% Piperidine/DMF (1 × 10 minutes), DMF wash (3 × 1 minute), IPA wash (3 × 1 minute), MeOH (3 × 1 minute). Upon the completion of Fmoc group removal via ninhydrin test, the peptide-bound resin was then dried *in vacuo* overnight.

## **Resin cleavage of linear peptide**

The eventual cleavage of linear pentapeptide from resin was performed by swelling the resin in a mixed solution of 1:1 (v/v) TFE/CH<sub>2</sub>Cl<sub>2</sub> (10 millilitres/gram of dried resin) and was allowed to stir for 24 hours. The suspension was then filtered through a Büchner filter, and the resin was washed repeatedly with additional CH<sub>2</sub>Cl<sub>2</sub> to fully extract the cleaved peptide. The filtrate was then evaporated and dried *in vacuo* overnight. The dried solid was eventually re-dissolved in CH<sub>2</sub>Cl<sub>2</sub>, co-evaporated with CH<sub>2</sub>Cl<sub>2</sub> several times to remove the entrapped TFE residue completely and was dried *in vacuo* overnight.

## **Macrocyclization procedure (syringe pump)**

Macrocyclization of the double deprotected linear pentapeptide using a combination of three coupling agents (DMTMM, HATU, and TBTU) at 0.8 equivalent each, together with DIPEA (8.0 equivalents) in 75% of a calculated volume of anhydrous CH<sub>2</sub>Cl<sub>2</sub> to generate a 0.001 M overall concentration. The crude and dry double deprotected linear peptide (DDLp) was dissolved in the remaining amount of CH<sub>2</sub>Cl<sub>2</sub>. The DDLp solution was then added to the bulk solution drop-wise using a syringe pump, over 2 hours. After the addition of all DDLp, the reaction was stirred overnight and was monitored via LCMS and generally complete in 1-2 hours. Upon completion, the crude product was subjected to acid-base wash to remove excess DIPEA and coupling agents. The resulting crude product was first purified by flash column chromatography, followed by reversed-phase HPLC, using a gradient of acetonitrile and deionized water with 0.1% TFA to afford the final pure compounds.

## **Synthesis of biotinylated compounds**

### **Boc Removal**

The Boc protecting group on tagged compounds were removed using a mixture of TFA/CH<sub>2</sub>Cl<sub>2</sub> (1:4, 0.1 M overall concentration) and anisole (2.0 equivalents). The reaction was run at room temperature under open atmosphere and monitored via TLC and LC/MS every 30 min. Upon completion the reaction solution was evaporated with addition of CH<sub>2</sub>Cl<sub>2</sub> to remove excess TFA and then concentrated *in vacuo*.

### **Peg-Biotin attachment**

After the removal of the Boc groups on compound 1-tag and compound 7-tag compounds, the free amines at the lysine residues of the tagged compounds were then biotinylated using *N*-hydroxysuccinimide-d-biotin-15-amino-4,7,10,13-tetraoxapentadecylate (NHS-dPEG<sub>4</sub>-biotin, 1.4 equivalents), and base DIPEA (8.0 equivalents) in CH<sub>2</sub>Cl<sub>2</sub> (0.1 M) under nitrogen gas. The reaction mixture was then stirred and monitored by LC/MS. Upon completion, the crude mixture was purified via RP-HPLC to yield the biotinylated compounds.

### **Solubility Determination**

1 mg of each SM145, compound 1 and 7 were added in three separate vials and stirred in 1.0 mL of mixture ethanol: Milli-Q water (8:2), and were allowed to stir for 30 minutes until the solution turned clear. This was followed by subsequent adding of 1 mg of each compound to the respective vial. The compounds were then stirred for another half an hour until it turned clear. The process was repeated until the clear solution

turned into a white gel. The observations indicated that the solution containing SM145 became saturated and no longer soluble when 5.2 mg of SM145 were added, whereas addition of 2 mg of compound **1** turned the solution into a white gel. Solution containing compound **7** remained clear and turned into a white gel only when 10.0 mg of compound **7** was added into the solution, whereas the solution containing compound **5** and **6** turned into a gel solution after the addition of 1.5 mg and 1.9 mg of each compound to the respective vial.

### **Experimental methods for compound 1**

Dipeptide Resin-O-Leu-*N*-Me-Val-Fmoc was synthesized following “**General peptide coupling**” procedure, by using 1.00 g (0.5 mmol, 1.0 equivalent) of Resin-O-Leu-NH<sub>2</sub>, 0.53 g (1.5 mmol, 3.0 equivalents) of Fmoc-*N*-Me-Val-OH, 0.20 g of HOBT (1.5 mmol, 3.0 equivalents), 0.47 mL of DIC (3.0 mmol, 6.0 equivalents) and 2.5 mL of DMF to generate a concentration of 0.20 M. The coupling reaction was run for 3 hours and a negative ninhydrin test was used to confirm the reaction completion. The reaction mixture was drained to afford the Fmoc-protected resin-bound dipeptide.

### **Resin-O-Leu-*N*-Me-Val-NH<sub>2</sub>**

The dipeptide Resin-O-Leu-*N*-Me-Val-NH<sub>2</sub> was synthesized following the “**General Fmoc removal**” procedure for SPPS. A positive ninhydrin was used to confirm the completion removal of Fmoc group.

### **Resin-O-Leu-*N*-Me-Val-D-Leu-Fmoc**

Following “**General peptide coupling**” procedure for SPPS, tripeptide Resin-O-Leu-*N*-Me-Val-D-Leu-Fmoc was synthesized using Resin-O-Leu-*N*-Me-Val-NH<sub>2</sub> synthesized from the previous peptide coupling, together with 0.53 g (1.5 mmol, 3.0 equivalents) of Fmoc-D-Leu-OH, 0.20 g of HOAt (1.5 mmol, 3.0 equivalents), 0.47 mL of DIC (3.0 mmol, 6.0 equivalents) and 2.5 mL of DMF to generate a concentration of 0.20 M. The coupling reaction was run for 3 hours and a negative ninhydrin test was used to confirm the reaction completion. The reaction mixture was drained to afford the Fmoc-protected resin-bound tripeptide.

### **Resin-O-Leu-*N*-Me-Val-D-Leu-NH<sub>2</sub>**

The tripeptide Resin-O-Leu-*N*-Me-Val-D-Leu-NH<sub>2</sub> was synthesized following the “**General Fmoc removal**” procedure for SPPS. A positive ninhydrin was used to confirm the completion removal of Fmoc group.

### **Resin-O-Leu-*N*-Me-Val-D-Leu-D-Phe-Fmoc**

Tetrapeptide Resin-O-Leu-*N*-Me-Val-D-Leu-D-Phe-Fmoc was synthesized following “**General peptide coupling**” procedure for SPPS, which Resin-O-Leu-*N*-Me-Val-D-Leu-NH<sub>2</sub> synthesized from the previous peptide coupling, together with 0.58 g (1.5 mmol, 3.0 equivalents) of Fmoc-D-Phe-OH, 0.20 g of HOBT (1.5 mmol, 3.0 equivalents), 0.47 mL of DIC (3.0 mmol, 6.0 equivalents) and 2.5 mL of DMF to generate a concentration of 0.20 M. The coupling reaction was run for 3 hours and a negative ninhydrin test was used to confirm the reaction completion. The reaction mixture was drained to afford the Fmoc-protected resin-bound tetrapeptide.

### **Resin-O-Leu-*N*-Me-Val-D-Leu-D-Phe-NH<sub>2</sub>**

The tetrapeptide Resin-O-Leu-*N*-Me-Val-D-Leu-D-Phe-NH<sub>2</sub> was synthesized following the “**General Fmoc removal**” procedure for SPPS. A positive ninhydrin was used to confirm the completion removal of Fmoc group.

### **Resin-O-Leu-*N*-Me-Val-D-Leu-D-Phe-3,3-Diphenyl-D-Ala-Fmoc**

Pentapeptide Resin-O-Leu-*N*-Me-Val-D-Leu-D-Phe-3,3-Diphenyl-D-Ala-Fmoc was synthesized following “**General peptide coupling**” procedure for SPPS, using Resin-O-Leu-*N*-Me-Val-D-Leu-D-Phe-NH<sub>2</sub> synthesized from the previous peptide coupling, together with 0.70 g (1.5 mmol, 3.0 equivalents) of Fmoc-3,3-Diphenyl-D-Ala-OH, 0.20 g of HOBT (1.5 mmol, 3.0 equivalents), 0.47 mL of DIC (3.0 mmol, 6.0 equivalents) and 2.5 mL of DMF to generate a concentration of 0.20 M. The coupling reaction was run for 3 hours and a negative ninhydrin test was used to confirm the reaction completion. The reaction mixture was

drained to afford the Fmoc-protected resin-bound pentapeptide.

#### **Resin-O-Leu-N-Me-Val-D-Leu-D-Phe-D-Ala-NH<sub>2</sub>**

The pentapeptide Resin-O-Leu-N-Me-Val-D-Leu-D-Phe-3,3-Diphenyl-D-Ala-NH<sub>2</sub> was synthesized following the “**General Fmoc removal**” procedure for SPPS. A positive ninhydrin was used to confirm the completion removal of Fmoc group.

#### **HO-Leu-N-Me-Val-D-Leu-D-Phe-3,3-Diphenyl-D-Ala-NH<sub>2</sub>**

The double deprotected linear pentapeptide (DDL) HO-Leu-N-Me-Val-D-Leu-D-Phe-3,3-Diphenyl-D-Ala-NH<sub>2</sub> was generated following the “**Resin cleavage of linear peptide**” procedure for SPPS. The linear pentapeptide was cleaved from the resin using a mixed solution of 6 mL of TFE and 6 mL of CH<sub>2</sub>Cl<sub>2</sub>. The resin containing solution was filtered and dried *in vacuo* to yield the DDL as a white solid (325 mg, overall 89%).

LC/MS (ESI): *m/z* called for C<sub>42</sub>H<sub>57</sub>N<sub>5</sub>O<sub>6</sub> (M+1) = 728.43, found 728.15.

<sup>1</sup>H NMR (500 MHz, CDCl<sub>3</sub>) δ 7.71 (d, *J* = 9.4 Hz, 2H), 7.30-7.05 (m, 14H), 6.98 (t, *J* = 7.4 Hz, 1H), 6.87 (br, 1H), 6.62 (d, *J* = 7.4 Hz, 1H), 6.59 (s, *br*, 1H), 6.35 (s, *br*, 1H), 5.83 (s, *br*, 1H), 5.08 (t, *J* = 10.9 Hz, 1H), 4.94-4.90 (m, 1H), 4.69 (d, *J* = 10.9 Hz, 1H), 4.55 (d, *J* = 11.8 Hz, 1H), 4.33 (s, *br*, 1H), 3.98 (s, *br*, 1H), 3.62 (s, *br*, 1H), 3.51 (t, *J* = 12.1 Hz, 1H), 3.06 (s, 3H), 2.93-2.90 (m, 1H), 2.29-2.24 (m, 1H), 2.15-2.11 (m, 1H), 1.53 (m, 2H), 1.40 (s, *br*, 1H), 1.19 (s, 1H), 0.99-0.61 (m, 18H).

#### **cyclo-Leu-N-Me-Val-D-Leu-D-Phe-3,3-Diphenyl-D-Ala (Compound 1)**

Compound **1** was synthesized using 0.33 g of the DDL generated (0.44 mmol, 1.0 equivalent), 0.11 g of TBTU (0.36 mmol, 0.80 equivalent), 0.14 g of HATU (0.36 mmol, 0.80 equivalent), 0.10 g of DMTMM (0.36 mmol, 0.80 equivalent), 0.62 mL of DIPEA (3.6 mmol, 8.0 equivalents) in anhydrous CH<sub>2</sub>Cl<sub>2</sub> (446 mL, 0.001M) following “**Macrocyclization procedure (syringe pump)**” procedure. The reaction was then stirred overnight and the reaction was monitored via LC/MS. Upon completion, the reaction mixture was subjected to acid-base wash, which was extracted twice with 10% (v/v) HCl<sub>(aq)</sub>. The organic layer was then re-extracted with a saturated of NaHCO<sub>3</sub> aqueous solution. The combined organic layers were dried over sodium sulfate, filtered, and concentrated *in vacuo*. The resulting crude product was purified via flash column chromatography on silica gel using an ethyl acetate-hexane gradient system, followed by purification via HPLC to yield compound **1** as white solid (151 mg, 39%).

R<sub>f</sub>: 0.74 (EtOAc:Hex = 0.75:0.25)

LC/MS: *m/z* called for C<sub>42</sub>H<sub>55</sub>N<sub>5</sub>O<sub>5</sub> (M+1) = 710.42, found 710.10.

HRMS (ESI-TOF): M+Na<sup>+</sup>, found 732.4102 C<sub>42</sub>H<sub>55</sub>N<sub>5</sub>O<sub>5</sub> requires 709.4203.

<sup>1</sup>H NMR (500 MHz, DMSO): δ 8.22 (m, NH), 8.07 (m, NH), 7.87 (d, *J* = 7.4 Hz, NH), 7.72 (m, NH), 7.29-7.14 (m, 13H), 6.92 (m, 2H), 5.16 (m, 1H), 4.57 (d, *J* = 11.4 Hz, 1H), 4.43 (dd, *J* = 7.0, 15.3 Hz, 1H), 4.33 (d, *J* = 11.9 Hz, 1H), 4.15 (dd, *J* = 7.2, 15.6 Hz, 1H), 3.46 (dd, *J* = 7.4, 14.9 Hz, 1H), 2.77 (m, 1H), 2.70 (m, 1H), 2.62 (s, 3H), 2.16 (m, 1H), 1.61 (m, 1H), 1.46 (m, 1H), 1.37 (m, 3H), 1.22 (m, 1H), 0.92-0.63 (m, 18H).

<sup>13</sup>C NMR (125 MHz, DMSO): δ 170.71, 170.22, 169.91, 169.80, 168.82, 141.78, 141.11, 137.38, 129.32, 129.03, 128.80, 128.74, 128.59, 128.47, 128.38, 128.12, 127.10, 126.91, 126.76, 126.60, 63.17, 58.14, 57.35, 56.44, 53.75, 51.90, 48.10, 40.87, 37.96, 37.83, 30.21, 25.23, 24.59, 24.50, 23.11, 22.81, 22.54, 18.86, 18.14.

## Scheme 1: Synthesis of compound 1

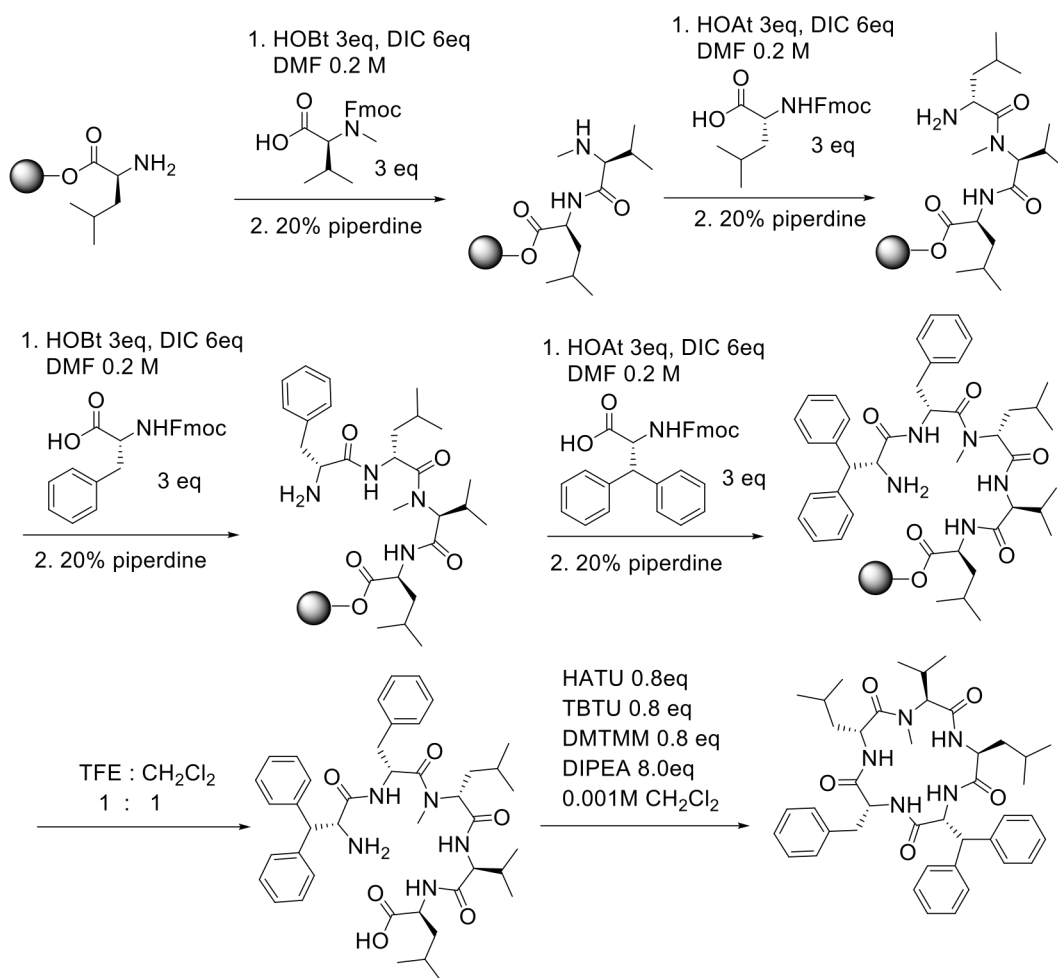

### Experimental methods for compound 1 TagII

Dipeptide Resin-O-D-Phe-3,3-Diphenyl-D-Ala-Fmoc was synthesized following “**General peptide coupling**” procedure, by using 1.00 g (0.5 mmol, 1.0 equivalent) of Resin-O-D-Phe-NH<sub>2</sub>, 0.69 g (1.5 mmol, 3.0 equivalents) of Fmoc-3,3-Diphenyl-D-Ala-OH, 0.20 g of HOBt (1.5 mmol, 3.0 equivalents), 0.47 mL of DIC (3.0 mmol, 6.0 equivalents) and 2.5 mL of DMF to generate a concentration of 0.20 M. The coupling reaction was run for 3 hours and a negative ninhydrin test was used to confirm the reaction completion. The reaction mixture was drained to afford the Fmoc-protected resin-bound dipeptide.

### Resin-O-D-Phe-3,3-Diphenyl-D-Ala-NH<sub>2</sub>

The dipeptide Resin-O-D-Phe-3,3-Diphenyl-D-Ala-NH<sub>2</sub> was synthesized following the “**General Fmoc removal**” procedure for SPPS. A positive ninhydrin was used to confirm the completion removal of Fmoc group.

### Resin-O-D-Phe-3,3-Diphenyl-D-Ala-Lys(Boc)-Fmoc

Following “**General peptide coupling**” procedure for SPPS, tripeptide Resin-O-D-Phe-3,3-Diphenyl-D-Ala-Lys(Boc)-Fmoc was synthesized using Resin-O-D-Phe-3,3-Diphenyl-D-Ala-NH<sub>2</sub> synthesized from the previous peptide coupling, together with 0.70 g (1.5 mmol, 3.0 equivalents) of Fmoc-Lys(Boc)-OH, 0.20 g of HOBt (1.5 mmol, 3.0 equivalents), 0.47 mL of DIC (3.0 mmol, 6.0 equivalents) and 2.5 mL of DMF to generate a concentration of 0.20 M. The coupling reaction was run for 3 hours and a negative ninhydrin test was used to confirm the reaction completion. The reaction mixture was drained to afford the Fmoc-protected

resin-bound tripeptide.

#### **Resin-O-D-Phe-3,3-Diphenyl-D-Ala-Lys(Boc)-NH<sub>2</sub>**

The tripeptide Resin-O-D-Phe-3,3-Diphenyl-D-Ala-Lys(Boc)-NH<sub>2</sub> was synthesized following the “**General Fmoc removal**” procedure for SPPS. A positive ninhydrin was used to confirm the completion removal of Fmoc group.

#### **Resin-O-D-Phe-3,3-Diphenyl-D-Ala-Lys(Boc)-N-Me-Val-Fmoc**

Tetrapeptide Resin-O-D-Phe-3,3-Diphenyl-D-Ala-Lys(Boc)-N-Me-Val-Fmoc was synthesized following “**General peptide coupling**” procedure for SPPS, which Resin-O-D-Phe-3,3-Diphenyl-D-Ala-Lys(Boc)-NH<sub>2</sub> synthesized from the previous peptide coupling, together with 0.53 g (1.5 mmol, 3.0 equivalents) of Fmoc-N-Me-Val-OH, 0.20 g of HOAt (1.5 mmol, 3.0 equivalents), 0.47 mL of DIC (3.0 mmol, 6.0 equivalents) and 2.5 mL of DMF to generate a concentration of 0.20 M. The coupling reaction was run for 3 hours and a negative ninhydrin test was used to confirm the reaction completion. The reaction mixture was drained to afford the Fmoc-protected resin-bound tetrapeptide.

#### **Resin-O-D-Phe-3,3-Diphenyl-D-Ala-Lys(Boc)-N-Me-Val-NH<sub>2</sub>**

The tetrapeptide Resin-O-D-Phe-3,3-Diphenyl-D-Ala-Lys(Boc)-N-Me-Val-NH<sub>2</sub> was synthesized following the “**General Fmoc removal**” procedure for SPPS. A positive ninhydrin was used to confirm the completion removal of Fmoc group.

#### **Resin-O-D-Phe-3,3-Diphenyl-D-Ala-Lys(Boc)-N-Me-Val-D-Leu-Fmoc**

Pentapeptide Resin-O-D-Phe-3,3-Diphenyl-D-Ala-Lys(Boc)-N-Me-Val-D-Leu-Fmoc was synthesized following “**General peptide coupling**” procedure for SPPS, using Resin-O-D-Phe-3,3-Diphenyl-D-Ala-Lys(Boc)-N-Me-Val-NH<sub>2</sub> synthesized from the previous peptide coupling, together with 0.53 g (1.5 mmol, 3.0 equivalents) of Fmoc-D-Leu-OH, 0.20 g of HOBt (1.5 mmol, 3.0 equivalents), 0.47 mL of DIC (3.0 mmol, 6.0 equivalents) and 2.5 mL of DMF to generate a concentration of 0.20 M. The coupling reaction was run for 3 hours and a negative ninhydrin test was used to confirm the reaction completion. The reaction mixture was drained to afford the Fmoc-protected resin-bound pentapeptide.

#### **Resin-O-D-Phe-3,3-Diphenyl-D-Ala-Lys(Boc)-N-Me-Val-D-Leu-NH<sub>2</sub>**

The pentapeptide Resin-O-D-Phe-3,3-Diphenyl-D-Ala-Lys(Boc)-N-Me-Val-D-Leu-NH<sub>2</sub> was synthesized following the “**General Fmoc removal**” procedure for SPPS. A positive ninhydrin was used to confirm the completion removal of Fmoc group.

#### **HO-D-Phe-3,3-Diphenyl-D-Ala-Lys(Boc)-N-Me-Val-D-Leu-NH<sub>2</sub>**

The double deprotected linear pentapeptide (DDLDP) HO-Leu-N-Me-Val-D-Leu-D-Phe-3,3-Diphenyl-D-Ala-NH<sub>2</sub> underwent cleavage following the “**Resin cleavage of linear peptide**” procedure for SPPS, using a mixed solution of 6 mL of TFE and 6 mL of CH<sub>2</sub>Cl<sub>2</sub>. The resin containing solution was filtered and dried *in vacuo* to yield the DDLDP as a white solid (180 mg, overall 42%).

LC/MS (ESI): *m/z* called for C<sub>47</sub>H<sub>66</sub>N<sub>6</sub>O<sub>8</sub> (M+1) = 843.49, found 843.20.

<sup>1</sup>H NMR (300 MHz, DMSO) δ 8.70-7.62 (m, 3H), 7.45-7.02 (m, 15H), 6.80-6.68 (m, 1H), 4.72-4.58 (d, *J* = 11.4 Hz, 1H), 4.41-4.17 (m, 4H), 4.08-3.98 (m, 2H), 3.03-2.92 (m, 1H), 2.91-2.84 (s, 3H), 2.82-2.63 (m, 4H), 2.33-2.03 (m, 1H), 1.88-1.71 (br, 1H), 1.68-1.53 (m, 1H), 1.52-1.31 (m, 11H), 1.27-1.21 (s, 1H), 1.19-0.99 (m, 4H), 0.94-0.69 (m, 12H).

#### **cyclo-D-Phe-3,3-Diphenyl-D-Ala-Lys(Boc)-N-Me-Val-D-Leu (Compound 1\_TagII)**

Macrocyclization of 0.15 g DDLDP compound **1** (0.18 mmol, 1.0 equivalent) was achieved using 0.029 g of TBTU (0.089 mmol, 0.50 equivalent), 0.023 g of HATU (0.089 mmol, 0.50 equivalent), 0.025 g of DMTMM (0.089 mmol, 0.50 equivalent), 0.37 mL of DIPEA (2.14 mmol, 12.0 equivalents) in anhydrous CH<sub>2</sub>Cl<sub>2</sub> (178 mL, 0.001M) following “**Macrocyclization procedure (syringe pump)**” procedure. The reaction was stirred overnight and the reaction was monitored via TLC and LC/MS. Upon completion, the reaction mixture was

subjected to acid-base wash to afford crude product, which was purified via flash column chromatography on silica gel using an ethyl acetate-hexane gradient system, followed by purification via HPLC to yield compound **1**\_TagII as white solid (19.4 mg, 13.2%).

LC/MS (ESI): *m/z* called for  $C_{47}H_{64}N_6O_7$  (M+1) = 825.48, found 825.20.

$^1H$  NMR (300 MHz,  $CDCl_3$ )  $\delta$  7.39-7.13 (m, 15H), 7.12-7.04 (d,  $J$  = 6.6 Hz, 1H), 6.96-6.83 (m, 2H), 6.68-6.60 (br, 1H), 6.60-5.95 (d,  $J$  = 6.0 Hz, 1H), 5.10-5.00 (t,  $J$  = 8.9 Hz, 1H), 4.81-4.74 (d,  $J$  = 9.3 Hz, 1H), 4.71-4.64 (d,  $J$  = 9.3 Hz, 1H), 4.57-4.48 (m, 1H), 4.39-4.25 (m, 1H), 4.10-4.00 (m, 1H), 3.20-2.99 (m, 4H), 2.97-2.92 (s, 3H), 2.37-2.20 (m, 1H), 1.70-1.54 (m, 1H), 1.49-1.44 (m, 2H), 1.43-1.36 (s, 9H), 1.35-1.17 (m, 6H), 1.15-1.02 (d,  $J$  = 7.3 Hz, 3H), 0.95-0.72 (d,  $J$  = 6.5 Hz, 9H).

## Scheme 2: Synthesis of compound **1**\_TagII

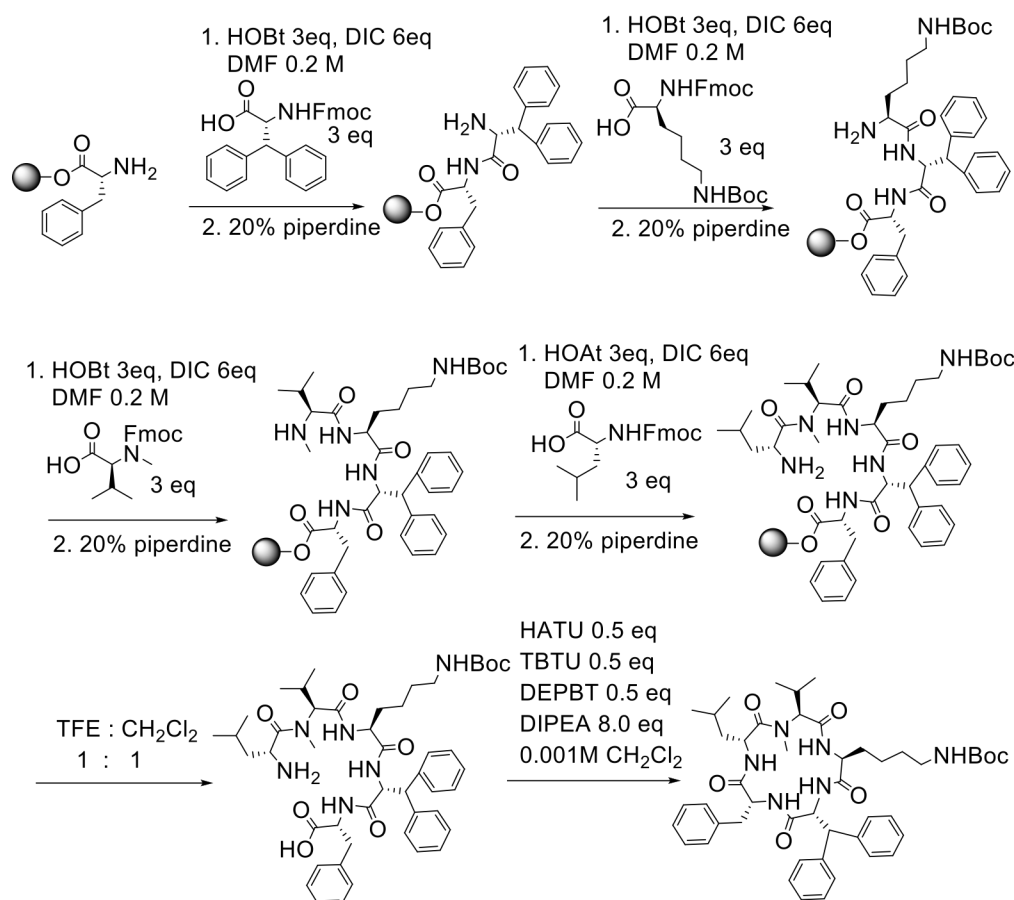

## Synthesis of biotinylated compound **1**\_TagII

### Boc removal

The Boc protecting group of compound **1** was removed following “**Boc removal**” procedure, utilizing a mixture of TFA/ $CH_2Cl_2$  (1:4, 0.1 M) and anisole (2.0 equivalents) to generate free amines at lysine residue. The free amine was taken to the subsequent biotinylation reaction without purification.

LC/MS (ESI): *m/z* called for  $C_{42}H_{56}N_6O_5$  (M+1) = 725.43, found 725.05.

### Peg-Biotin attachment

The biotinylated compound **1** was afforded by using “**Peg-Biotin attachment**” procedure with 19.4 mg (0.027 mmol, 1.0 equivalent) of deprotected compound **1**\_TagII, 22.0 mg (0.037 mmol, 1.4 equivalents) of NHS-PEG<sub>4</sub>-Biotin, 27  $\mu$ L (0.16 mmol, 8.0 equivalents) of DIPEA in 268  $\mu$ L of  $CH_2Cl_2$ . The reaction mixture

was stirred for 4 hours and monitored via LC/MS. Upon completion, the crude product was purified using preparative HPLC to generate pure biotinylated compound in 24.9% yield as white solid.

R<sub>f</sub>: 0.78 (EtOAc:MeOH = 0.60:0.40)

LC/MS (ESI): *m/z* called for C<sub>63</sub>H<sub>91</sub>N<sub>9</sub>O<sub>12</sub>S (M+1) = 1198.65, found 1198.10.

HRMS (ESI-TOF): M+Na<sup>+</sup>, found 1220.6414 C<sub>63</sub>H<sub>91</sub>N<sub>9</sub>O<sub>12</sub>S requires 1197.6508.

<sup>1</sup>H NMR (600 MHz, MeOD) δ 7.30-7.26 (m, 13H), 7.01 (d, *J* = 7.1 Hz, 2H), 5.21 (d, *J* = 11.3 Hz, 1H), 4.72-4.61 (m, 1H), 4.48-4.33 (m, 2H), 4.14-4.09 (m, 1H), 3.82-3.77 (m, 1H), 3.74 (t, *J* = 6.2 Hz, 2H), 3.66-3.62 (m, 12H), 3.57-3.55 (m, 3H), 3.39-3.38 (m, 2H), 3.25-3.16 (m, 1H), 3.11-2.94 (m, 5H), 2.84 (s, 3H), 2.67-2.62 (m, 2H), 2.45 (t, *J* = 6.2 Hz, 2H), 2.32-2.24 (m, 4H), 1.80-1.58 (m, 8H), 1.50-1.30 (m, 4H), 1.24-1.16 (m, 1H), 1.11-1.05 (m, 2H), 1.00-0.98 (m, 3H), 0.86-0.81 (m, 8H).

<sup>13</sup>C NMR (150 MHz, MeOD): δ 174.60, 172.59, 172.43, 172.33, 171.27, 170.69, 170.01, 164.69, 140.68, 140.34, 136.63, 128.73, 128.72, 128.54, 128.30, 128.24, 128.19, 128.14, 128.01, 127.67, 126.89, 126.82, 126.65, 126.40, 126.13, 70.56, 70.19, 70.17, 70.13, 70.07, 69.96, 69.86, 69.20, 66.92, 64.15, 63.92, 62.64, 62.16, 58.03, 57.37, 56.40, 55.63, 53.96, 53.18, 53.16, 48.17, 39.74, 39.01, 39.82, 36.27, 28.38, 26.74, 25.47, 25.29, 25.14, 25.07, 23.99, 23.04, 22.13, 20.88, 18.76, 17.85.

### Scheme 3: Synthesis of biotinylated compound 1\_TagII

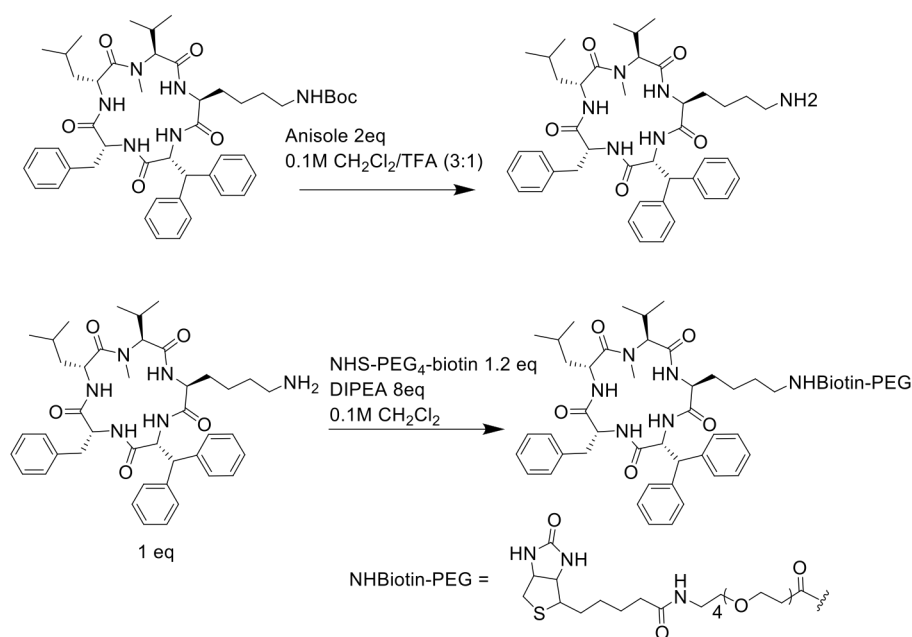

### Experimental methods for compound 2

#### **HO- Leu-*N*-Me-Val-D-Leu-D-3-(2-Pyridyl)Ala-3,3-Diphenyl-D-Ala-NH<sub>2</sub>**

Following “**General peptide coupling**” procedure for SPPS and the similar peptide coupling sequence as mentioned for compound **1**, except that the fourth peptide coupling was substituted by Fmoc- D-3-(2-Pyridyl)Ala-OH. The double deprotected linear pentapeptide (DDLp) HO-Leu-*N*-Me-Val-D-Leu-D-3-(2-Pyridyl)Ala-3,3-Diphenyl-D-Ala-NH<sub>2</sub> was generated through the cleavage of the following “**Resin cleavage of linear peptide**” procedure (270 mg, overall 75%).

LC/MS (ESI): *m/z* called for C<sub>41</sub>H<sub>56</sub>N<sub>6</sub>O<sub>6</sub> (M+1) = 729.43, found 729.05.

#### **cyclo-Leu-*N*-Me-Val-D-Leu-D-3-(2-Pyridyl)Ala-3,3-Diphenyl-D-Ala (Compound 2)**

Compound **2** was synthesized using 0.14 g of the DDLp generated (0.19 mmol, 1.0 equivalent), 0.05 g of TBTU (0.15 mmol, 0.80 equivalent), 0.06 g of HATU (0.15 mmol, 0.80 equivalent), 0.04 g of DMTMM (0.15 mmol, 0.80 equivalent), 0.27 mL of DIPEA (1.54 mmol, 8.0 equivalents) in anhydrous CH<sub>2</sub>Cl<sub>2</sub> (192 mL, 0.001M) following “**Macrocyclization procedure (syringe pump)**” procedure. The resulting crude product was purified via flash column chromatography on silica gel using an ethyl acetate-hexane gradient system, followed by purification via HPLC to yield compound **2** as white solid (72 mg, 29%).

R<sub>f</sub>: 0.69 (EtOAc:MeOH = 0.90:0.10)

LC/MS (ESI): *m/z* called for C<sub>41</sub>H<sub>54</sub>N<sub>6</sub>O<sub>5</sub> (M+1) = 711.42, found 711.

<sup>1</sup>H NMR (300 MHz, CDCl<sub>3</sub>) δ 8.50 (s, br, 1H), 8.02 (s, br, 1H), 7.74 (s, br, 1H), 7.45-7.08 (m, 14H), 6.89 (s, br, 1H), 5.22-4.64 (m, 3H), 4.60-4.39 (m, 1H), 3.74-3.20 (m, 1H), 3.03-2.81 (m, 3H), 2.45-2.29 (m, 1H), 2.29-2.06 (m, 1H), 1.76-1.47 (s, br, 3H), 1.46-1.07 (m, 5H), 1.05-0.15 (m, 18H).

### Experimental methods for compound 3

#### **HO- Leu-*N*-Me-Val-D-Leu-D-3-(3-Pyridyl)Ala-3,3-Diphenyl-D-Ala-NH<sub>2</sub>**

Following “**General peptide coupling**” procedure for SPPS and the similar peptide coupling sequence as mentioned for compound **1**, except that the fourth peptide coupling was substituted by Fmoc- D-3-(3-Pyridyl)Ala-OH. The double deprotected linear pentapeptide (DDLp) HO-Leu-*N*-Me-Val-D-Leu-D-3-(3-Pyridyl)Ala-3,3-Diphenyl-D-Ala-NH<sub>2</sub> was generated through the cleavage of the following “**Resin cleavage of linear peptide**” procedure (278 mg, 76%).

LC/MS (ESI): *m/z* called for C<sub>41</sub>H<sub>56</sub>N<sub>6</sub>O<sub>6</sub> (M+1) = 729.43, found 729.05.

#### **cyclo-Leu-*N*-Me-Val-D-Leu-D-3-(3-Pyridyl)Ala-3,3-Diphenyl-D-Ala (Compound 3)**

Compound **3** was synthesized using 0.28 g of the DDLp generated (0.38 mmol, 1.0 equivalent), 0.10 g of TBTU (0.30 mmol, 0.80 equivalent), 0.12 g of HATU (0.30 mmol, 0.80 equivalent), 0.08 g of DMTMM (0.30 mmol, 0.80 equivalent), 0.27 mL of DIPEA (3.04 mmol, 8.0 equivalents) in anhydrous CH<sub>2</sub>Cl<sub>2</sub> (380 mL, 0.001M) following “**Macrocyclization procedure (syringe pump)**” procedure. The resulting crude product was purified via flash column chromatography on silica gel using an ethyl acetate-hexane gradient system, followed by purification via HPLC to yield compound **3** as white solid (110 mg, 31%).

R<sub>f</sub>: 0.69 (EtOAc:MeOH = 0.90:0.10)

LC/MS (ESI): *m/z* called for: C<sub>41</sub>H<sub>54</sub>N<sub>6</sub>O<sub>5</sub> (M+1) = 711.42, found 711.10.

<sup>1</sup>H NMR (300 MHz, CDCl<sub>3</sub>) δ 8.76 (s, 1H), 8.51 (s, 2H), 8.07 (s, 1H), 7.41-7.35 (m, 2H), 7.18 (m, 6H), 7.13-7.05 (m, 2H), 5.30 (s, 2H), 5.02 (s, 1H), 4.8-4.76 (m, 2H), 4.54 (d, *J*=10.8 Hz, 1H), 3.51-3.30 (m, 4H), 2.97 (s, 1H), 2.8 (s, 2H), 0.98 (s, 1H), 0.93 (m, 6H), 0.89 (m, 5H), 0.80 (d, *J*=6.29 Hz, 4H), 0.74 (m, 7H).

### Experimental methods for compound 4

#### **HO- Leu-*N*-Me-Val-D-Leu-D-3-(4-Pyridyl)Ala-3,3-Diphenyl-D-Ala-NH<sub>2</sub>**

Following “**General peptide coupling**” procedure for SPPS and the similar peptide coupling sequence as mentioned for compound **1**, except that the fourth peptide coupling was substituted by Fmoc- D-3-(4-Pyridyl)Ala-OH. The double deprotected linear pentapeptide (DDLp) HO-Leu-*N*-Me-Val-D-Leu-D-3-(4-Pyridyl)Ala-3,3-Diphenyl-D-Ala-NH<sub>2</sub> was generated through the cleavage of the following “**Resin cleavage of linear peptide**” procedure (350 mg, overall 96%).



LC/MS (ESI):  $m/z$  called for  $C_{41}H_{56}N_6O_6$  (M+1) = 729.43, found 729.20.

#### ***cyclo*-Leu-*N*-Me-Val-D-Leu-D-3-(4-Pyridyl)Ala-3,3-Diphenyl-D-Ala (Compound 4)**

Compound **4** was synthesized through macrocyclization using 0.35 g of the DDLP generated (0.50 mmol, 1.0 equivalent), 0.12 g of TBTU (0.40 mmol, 0.80 equivalent), 0.15 g of HATU (0.40 mmol, 0.80 equivalent), 0.11 g of DMTMM (0.40 mmol, 0.80 equivalent), 0.67 mL of DIPEA (4 mmol, 8.0 equivalents) in anhydrous  $CH_2Cl_2$  (484 mL, 0.001M) following “**Macrocyclization procedure (syringe pump)**” procedure. The resulting crude product was purified via flash column chromatography on silica gel using an ethyl acetate-hexane gradient system, followed by purification via HPLC to yield compound **4** as white solid (103 mg, 30%).

$R_f$ : 0.75 (EtOAc)

LC/MS (ESI):  $m/z$  called for  $C_{41}H_{54}N_6O_5$  (M+1) = 711.42, found 711.20.

$^1H$  NMR (500 MHz,  $CDCl_3$ ):  $\delta$  8.41 (*br*, 1H), 8.27 (d,  $J$  = 5.4 Hz, 1H), 7.85 (d,  $J$  = 9.2 Hz, NH), 7.58 (*br*, NH), 7.39-7.15 (m, 10H), 6.90 (*br*, NH), 6.69 (d,  $J$  = 3.5 Hz, 2H), 6.51 (*br*, NH), 5.27 (t,  $J$  = 10.7 Hz, 1H), 5.01 (m, 1H), 4.81 (d,  $J$  = 10.8 Hz, 1H), 4.59 (m, 1H), 4.39 (m, 1H), 3.73 (m, 2H), 3.11 (s, 3H), 3.02 (d,  $J$  = 9.8 Hz, 1H), 2.82 (*br*, 1H), 2.35 (m, 1H), 1.62 (m, 4H), 1.03-0.71 (m, 18H).

#### **Experimental methods for compound 5**

##### **HO-Leu-*N*-Me-Val-D-Leu-D-Trp(Boc)-3,3-Diphenyl-D-Ala-NH<sub>2</sub>**

Following “**General peptide coupling**” procedure for SPPS and the similar peptide coupling sequence as mentioned for compound **1**, except that the fourth peptide coupling was substituted by Fmoc-D-Trp(Boc)-OH. The double deprotected linear pentapeptide (DDLDP) HO-Leu-*N*-Me-Val-D-Leu-D-Trp(Boc)-3,3-Diphenyl-D-Ala-NH<sub>2</sub> was generated through the cleavage of the following “**Resin cleavage of linear peptide**” procedure (360 mg, overall 83%).

LC/MS (ESI):  $m/z$  called for  $C_{49}H_{66}N_6O_8$  (M+1) = 867.49, found 867.15.

#### ***cyclo*-Leu-*N*-Me-Val-D-Leu-D-Trp(Boc)-3,3-Diphenyl-D-Ala (Compound 5)**

Compound **5** was synthesized using 0.36 g of the DDLDP generated (0.40 mmol, 1.0 equivalent), 0.11 g of TBTU (0.33 mmol, 0.80 equivalent), 0.13 g of HATU (0.33 mmol, 0.80 equivalent), 0.09 g of DMTMM (0.33 mmol, 0.80 equivalent), 0.59 mL of DIPEA (3 mmol, 8.0 equivalents) in anhydrous  $CH_2Cl_2$  (420 mL, 0.001M) following “**Macrocyclization procedure (syringe pump)**” procedure. The resulting crude product was purified via flash column chromatography on silica gel using an ethyl acetate-hexane gradient system, followed by purification via HPLC and “**Boc Removal**” procedure to remove the Boc protecting group, yielded compound **5** as white solid (94.5 mg, 30%).

$R_f$ : 0.50 (Hex:EtOAc = 0.30:0.70)

LC/MS (ESI):  $m/z$  called for  $C_{44}H_{56}N_6O_5$  (M+1) = 749.43, found 749.10.

$^1H$  NMR (500 MHz, DMSO):  $\delta$  10.79 (d,  $J$  = 2.0 Hz, 1H), 8.04 (d,  $J$  = 8.0 Hz, 1H), 7.84 (m, 2H), 7.51 (d,  $J$  = 9.5 Hz, 1H), 7.34-6.99 (m, 14H), 6.76 (s, 1H), 5.17 (m, 1H), 4.70 (d,  $J$  = 10.6 Hz, 1H), 4.56 (d,  $J$  = 11.5 Hz, 1H), 4.43 (dd,  $J$  = 7.3, 15.2 Hz, 1H), 4.27 (d,  $J$  = 11.8 Hz, 1H), 4.13 (m, 1H), 3.53 (dd,  $J$  = 7.4, 14.9 Hz, 1H), 3.08 (m, 1H), 2.94 (m, 1H), 2.63 (s, 3H), 2.16 (m, 1H), 1.50 (m, 2H), 1.38 (m, 1H), 1.26 (m, 4H), 0.90-0.63 (m, 18H).

#### **Experimental methods for compound 6**

##### **HO-Leu-*N*-Me-Val-D-Leu-D-Tyr(Me)-3,3-Diphenyl-D-Ala-NH<sub>2</sub>**

Following “**General peptide coupling**” procedure for SPPS and the similar peptide coupling sequence as mentioned for compound **1**, except that the fourth peptide coupling was substituted by Fmoc-D-Tyr(Me)-OH. The double deprotected linear pentapeptide (DDLDP) HO-Leu-*N*-Me-Val-D-Leu-D-Tyr(Me)-3,3-Diphenyl-D-Ala-NH<sub>2</sub> was generated through the cleavage of the following “**Resin cleavage of linear peptide**” procedure (500 mg, overall 100%).

LC/MS (ESI):  $m/z$  called for  $C_{43}H_{59}N_5O_7$  (M+1) = 758.44, found 758.55.

#### ***cyclo*-Leu-*N*-Me-Val-D-Leu-D-Tyr(Me)-3,3-Diphenyl-D-Ala (Compound 6)**

Compound **6** was synthesized using 0.50 g of the DDLP generated (0.70 mmol, 1.0 equivalent), 0.13 g of TBTU (0.50 mmol, 0.80 equivalent), 0.15 g of HATU (0.50 mmol, 0.80 equivalent), 0.11 g of DMTMM (0.50 mmol, 0.80 equivalent), 0.70 mL of DIPEA (5 mmol, 8.0 equivalents) in anhydrous CH<sub>2</sub>Cl<sub>2</sub> (660 mL, 0.001M) following “**Macrocyclization procedure (syringe pump)**” procedure. The resulting crude product was purified via flash column chromatography on silica gel using an ethyl acetate-hexane gradient system, followed by purification via HPLC to yield compound **6** as white solid (160 mg, 32%).

R<sub>f</sub>: 0.38 (Hex:EtOAc = 0.25:0.75)

LC/MS (ESI): *m/z* called for C<sub>43</sub>H<sub>57</sub>N<sub>5</sub>O<sub>6</sub> (M+1) = 740.43, found 740.10.

<sup>1</sup>H NMR (600 MHz, DMSO): δ 7.88 (m, 3NH), 7.47 (d, *J* = 9.5 Hz, NH), 7.29-7.18 (m, 10H), 7.00 (m, 4H), 5.18 (t, *J* = 10.7 Hz, 1H), 4.71 (d, *J* = 10.6 Hz, 1H), 4.58 (d, *J* = 11.5 Hz, 1H), 4.41 (dd, *J* = 7.2, 15.1 Hz, 1H), 4.30 (d, *J* = 11.9 Hz, 1H), 4.11 (dd, *J* = 7.1, 14.7 Hz, 1H), 3.73 (s, 3H), 3.51 (dd, *J* = 7.2, 14.5 Hz, 1H), 2.68 (m, 1H), 2.64 (s, 3H), 2.19 (m, 1H), 1.59 (m, 1H), 1.47 (m, 1H), 1.39-1.30 (m, 3H), 0.93-0.62 (m, 18H).

### **Experimental methods for compound 7**

Dipeptide Resin-O-Leu-*N*-Me-Val-Fmoc was synthesized following “**General peptide coupling**” procedure, by using 1.00 g (0.5 mmol, 1.0 equivalent) of Resin-O-Leu-NH<sub>2</sub>, 0.53 g (1.5 mmol, 3.0 equivalents) of Fmoc-*N*-Me-Val-OH, 0.20 g of HOBt (1.5 mmol, 3.0 equivalents), 0.47 mL of DIC (3.0 mmol, 6.0 equivalents) and 2.5 mL of DMF to generate a concentration of 0.20 M. The coupling reaction was run for 3 hours and a negative ninhydrin test was used to confirm the reaction completion. The reaction mixture was drained to afford the Fmoc-protected resin-bound dipeptide.

#### **Resin-O-Leu-*N*-Me-Val-NH<sub>2</sub>**

The dipeptide Resin-O-Leu-*N*-Me-Val-NH<sub>2</sub> was synthesized following the “**General Fmoc removal**” procedure for SPPS. A positive ninhydrin was used to confirm the completion removal of Fmoc group.

#### **Resin-O-Leu-*N*-Me-Val-D-Leu-Fmoc**

Following “**General peptide coupling**” procedure for SPPS, tripeptide Resin-O-Leu-*N*-Me-Val-D-Leu-Fmoc was synthesized using Resin-O-Leu-*N*-Me-Val-NH<sub>2</sub> synthesized from the previous peptide coupling, together with 0.53 g (1.5 mmol, 3.0 equivalents) of Fmoc-D-Leu-OH, 0.20 g of HOAt (1.5 mmol, 3.0 equivalents), 0.47 mL of DIC (3.0 mmol, 6.0 equivalents) and 2.5 mL of DMF to generate a concentration of 0.20 M. The coupling reaction was run for 3 hours and a negative ninhydrin test was used to confirm the reaction completion. The reaction mixture was drained to afford the Fmoc-protected resin-bound tripeptide.

#### **Resin-O-Leu-*N*-Me-Val-D-Leu-NH<sub>2</sub>**

The tripeptide Resin-O-Leu-*N*-Me-Val-D-Leu-NH<sub>2</sub> was synthesized following the “**General Fmoc removal**” procedure for SPPS. A positive ninhydrin was used to confirm the completion removal of Fmoc group.

#### **Resin-O-Leu-*N*-Me-Val-D-Leu-D-3-(4-Thiazoyl)Ala-Fmoc**

Tetrapeptide Resin-O-Leu-*N*-Me-Val-D-Leu-D-3-(4-Thiazoyl)Ala-Fmoc was synthesized following “**General peptide coupling**” procedure for SPPS, which Resin-O-Leu-*N*-Me-Val-D-Leu-NH<sub>2</sub> synthesized from the previous peptide coupling, together with 0.59 g (1.5 mmol, 3.0 equivalents) of Fmoc-D-3-(4-Thiazoyl)Ala-OH, 0.20 g of HOBt (1.5 mmol, 3.0 equivalents), 0.47 mL of DIC (3.0 mmol, 6.0 equivalents) and 2.5 mL of DMF to generate a concentration of 0.20 M. The coupling reaction was run for 3 hours and a negative ninhydrin test was used to confirm the reaction completion. The reaction mixture was drained to afford the Fmoc-protected resin-bound tetrapeptide.

#### **Resin-O-Leu-*N*-Me-Val-D-Leu-D-3-(4-Thiazoyl)Ala-NH<sub>2</sub>**

The tetrapeptide Resin-O-Leu-*N*-Me-Val-D-Leu-D-3-(4-Thiazoyl)Ala-NH<sub>2</sub> was synthesized following the “**General Fmoc removal**” procedure for SPPS. A positive ninhydrin was used to confirm the completion removal of Fmoc group.

#### **Resin-O-Leu-*N*-Me-Val-D-Leu-D-3-(4-Thiazoyl)Ala-3,3-Diphenyl-D-Ala-Fmoc**

Pentapeptide Resin-O-Leu-*N*-Me-Val-D-Leu-D-3-(4-Thiazoyl)Ala-3,3-Diphenyl-D-Ala-Fmoc was

synthesized following “**General peptide coupling**” procedure for SPPS, using Resin-O-Leu-N-Me-Val-D-Leu-D-3-(4-Thiazoyl)Ala-NH<sub>2</sub> synthesized from the previous peptide coupling, together with 0.70 g (1.5 mmol, 3.0 equivalents) of Fmoc-3,3-Diphenyl-D-Ala-OH, 0.20 g of HOBt (1.5 mmol, 3.0 equivalents), 0.47 mL of DIC (3.0 mmol, 6.0 equivalents) and 2.5 mL of DMF to generate a concentration of 0.20 M. The coupling reaction was run for 3 hours and a negative ninhydrin test was used to confirm the reaction completion. The reaction mixture was drained to afford the Fmoc-protected resin-bound pentapeptide.

#### **Resin-O-Leu-N-Me-Val-D-Leu-D-3-(4-Thiazoyl)Ala-3,3-Diphenyl-D-Ala-NH<sub>2</sub>**

The pentapeptide Resin-O-Leu-N-Me-Val-D-Leu-D-3-(4-Thiazoyl)Ala-3,3-Diphenyl-D-Ala-NH<sub>2</sub> was synthesized following the “**General Fmoc removal**” procedure for SPPS. A positive ninhydrin was used to confirm the completion removal of Fmoc group.

#### **HO-Leu-N-Me-Val-D-Leu-D-3-(4-Thiazoyl)Ala-3,3-Diphenyl-D-Ala-NH<sub>2</sub>**

The double deprotected linear pentapeptide (DDL) HO-Leu-N-Me-Val-D-Leu-D-3-(4-Thiazoyl)Ala-3,3-Diphenyl-D-Ala-NH<sub>2</sub> was generated following the “**Resin cleavage of linear peptide**” procedure for SPPS. The linear pentapeptide was cleaved from the resin using a mixed solution of 7 mL of TFE and 7 mL of CH<sub>2</sub>Cl<sub>2</sub>. The resin containing solution was filtered and dried *in vacuo* to yield the DDL as a pale yellow solid (372 mg, overall 93%).

LC/MS (ESI): *m/z* called for C<sub>39</sub>H<sub>54</sub>N<sub>6</sub>O<sub>6</sub>S (M+1) = 735.38, found 735.15

<sup>1</sup>H NMR (500 MHz, CDCl<sub>3</sub>) δ 8.66 (s, 1H), 8.32 (s, 1H), 8.17 (d, *J* = 7.9 Hz, 1H), 7.49-7.16 (m, 10H), 6.90 (s, 1H), 6.87 (s, 1H), 5.35-5.31 (s, *br*, 1H), 4.88-4.74 (m, 3H), 4.55 (s, 1H), 3.15 (s, *br*, 1H), 3.05 (s, 3H), 2.34-2.30 (m, 1H), 1.68-1.51 (m, 5H), 1.36-1.26 (m, 5H), 1.07-1.06 (d, *J* = 5.8 Hz, 1H), 0.92-0.84 (m, 17H).

#### **cyclo-Leu-N-Me-Val-D-Leu-D-3-(4-Thiazoyl)Ala-3,3-Diphenyl-D-Ala (Compound 7)**

Compound 7 was synthesized using 0.37 g of the DDL generated (0.50 mmol, 1.0 equivalent), 0.13 g of TBTU (0.40 mmol, 0.80 equivalent), 0.15 g of HATU (0.40 mmol, 0.80 equivalent), 0.11 g of DMTMM (0.40 mmol, 0.80 equivalent), 0.70 mL of DIPEA (4 mmol, 8.0 equivalents) in anhydrous CH<sub>2</sub>Cl<sub>2</sub> (505 mL, 0.001M) following “**Macrocyclization procedure (syringe pump)**” procedure. The reaction was then stirred overnight and the reaction was monitored via LC/MS. Upon completion, the reaction mixture was subjected to acid-base wash, which was extracted twice with 10% (v/v) HCl<sub>(aq)</sub>. The organic layer was then re-extracted with a saturated of NaHCO<sub>3</sub> aqueous solution. The combined organic layers were dried over sodium sulfate, filtered, and concentrated *in vacuo*. The resulting crude product was purified via flash column chromatography on silica gel using an ethyl acetate-hexane gradient system, followed by purification via HPLC to yield compound 7 as white solid (151 mg, 40.5%).

R<sub>f</sub>: 0.30 (100% EtOAc)

LC/MS: *m/z* called for C<sub>39</sub>H<sub>52</sub>N<sub>6</sub>O<sub>5</sub>S (M+1) = 717.37, found 717.05.

HRMS (ESI-TOF): M+Na<sup>+</sup>, found 739.3608 C<sub>39</sub>H<sub>52</sub>N<sub>6</sub>O<sub>5</sub>S requires 716.3720.

<sup>1</sup>H NMR (500 MHz, DMSO): δ 9.11 (s, 1H), 8.35 (d, *J* = 8.7 Hz, NH), 7.95-7.85 (m, 2NH), 7.65 (d, *J* = 9.8 Hz, NH), 7.40-7.25 (m, 5H), 7.25-7.15 (m, 4H), 7.15-7.10 (m, 1H), 7.05 (s, 1H), 5.25 (m, 1H), 4.70 (d, *J* = 10.7 Hz, 1H), 4.55 (d, *J* = 11.4 Hz, 1H), 4.45 (dd, *J* = 7.8, 15.1 Hz, 1H), 4.35 (d, *J* = 12.2 Hz, 1H), 4.30 (dd, *J* = 6.5, 15.1 Hz, 1H), 2.87 (m, 2H), 2.60 (s, 3H), 2.14 (m, 1H), 1.51 (m, 2H), 1.39 (m, 1H), 1.25 (m, 4H), 0.90-0.60 (m, 18H).

<sup>13</sup>C NMR (125 MHz, DMSO): δ 170.74, 169.95, 169.69, 169.46, 168.68, 154.49, 152.72, 141.63, 141.30, 128.88, 128.62, 128.56, 128.47, 127.20, 126.85, 116.28, 63.07, 56.93, 54.77, 53.78, 51.80, 47.83, 41.09, 37.97, 32.90, 30.19, 25.35, 24.49, 24.31, 23.57, 22.91, 22.64, 22.52, 21.93, 19.59, 18.85.

#### Scheme 4: Synthesis of compound 7

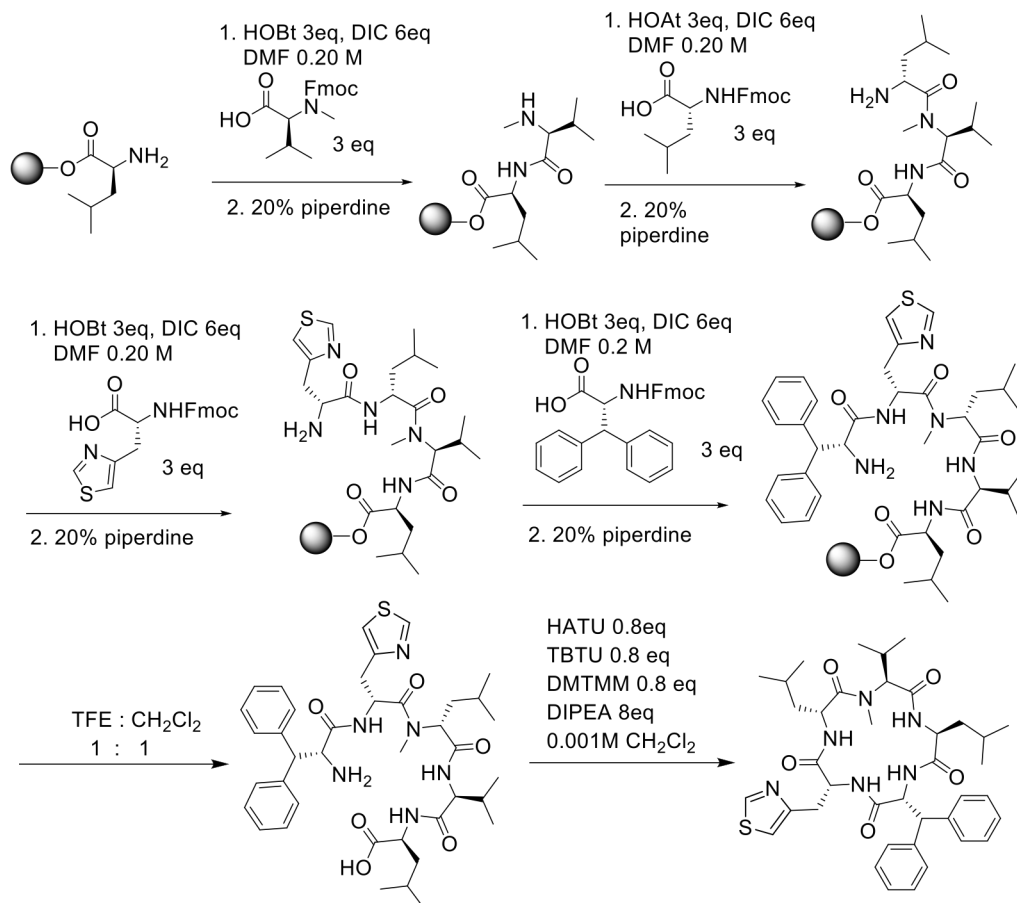

#### Experimental methods for compound 7 TagII

Dipeptide Resin-O-D-Leu-D-3-(4-Thiazoyl)Ala-Fmoc was synthesized following “**General peptide coupling**” procedure, by using 1.00 g (0.5 mmol, 1.0 equivalent) of Resin-O-D-Leu-NH<sub>2</sub>, 0.59 g (1.5 mmol, 3.0 equivalents) of Fmoc-D-3-(4-Thiazoyl)Ala-OH, 0.20 g of HOBT (1.5 mmol, 3.0 equivalents), 0.47 mL of DIC (3.0 mmol, 6.0 equivalents) and 2.5 mL of DMF to generate a concentration of 0.20 M. The coupling reaction was run for 3 hours and a negative ninhydrin test was used to confirm the reaction completion. The reaction mixture was drained to afford the Fmoc-protected resin-bound dipeptide.

#### Resin-O-D-Leu-D-3-(4-Thiazoyl)Ala-NH<sub>2</sub>

The dipeptide Resin-O-D-Leu-D-3-(4-Thiazoyl)Ala-NH<sub>2</sub> was synthesized following the “**General Fmoc removal**” procedure for SPPS. A positive ninhydrin was used to confirm the completion removal of Fmoc group.

#### Resin-O-D-Leu-D-3-(4-Thiazoyl)Ala-3,3-Diphenyl-D-Ala-Fmoc

Following “**General peptide coupling**” procedure for SPPS, tripeptide Resin-O-D-Leu-D-3-(4-Thiazoyl)Ala-3,3-Diphenyl-D-Ala-Fmoc was synthesized using Resin-O-D-Leu-D-3-(4-Thiazoyl)Ala-NH<sub>2</sub> synthesized from the previous peptide coupling, together with 0.70 g (1.5 mmol, 3.0 equivalents) of Fmoc-3,3-Diphenyl-D-Ala-OH, 0.20 g of HOBT (1.5 mmol, 3.0 equivalents), 0.47 mL of DIC (3.0 mmol, 6.0 equivalents) and 2.5 mL of DMF to generate a concentration of 0.20 M. The coupling reaction was run for 3 hours and a negative ninhydrin test was used to confirm the reaction completion. The reaction mixture was drained to afford the Fmoc-protected resin-bound tripeptide.

#### Resin-O-D-Leu-D-3-(4-Thiazoyl)Ala-3,3-Diphenyl-D-Ala-NH<sub>2</sub>

The tripeptide Resin-O-D-Leu-D-3-(4-Thiazoyl)Ala-3,3-Diphenyl-D-Ala-NH<sub>2</sub> was synthesized following the

**“General Fmoc removal”** procedure for SPPS. A positive ninhydrin was used to confirm the completion removal of Fmoc group.

#### **Resin-O-D-Leu-D-3-(4-Thiazoyl)Ala-3,3-Diphenyl-D-Ala-Lys(Boc)-Fmoc**

Tetrapeptide Resin-O-D-Leu-D-3-(4-Thiazoyl)Ala-3,3-Diphenyl-D-Ala-Lys(Boc)-Fmoc was synthesized following **“General peptide coupling”** procedure for SPPS, which Resin-O-D-Leu-D-3-(4-Thiazoyl)Ala-3,3-Diphenyl-D-Ala-NH<sub>2</sub> synthesized from the previous peptide coupling, together with 0.70 g (1.5 mmol, 3.0 equivalents) of Fmoc-Lys(Boc)-OH, 0.20 g of HOBt (1.5 mmol, 3.0 equivalents), 0.47 mL of DIC (3.0 mmol, 6.0 equivalents) and 2.5 mL of DMF to generate a concentration of 0.20 M. The coupling reaction was run for 3 hours and a negative ninhydrin test was used to confirm the reaction completion. The reaction mixture was drained to afford the Fmoc-protected resin-bound tetrapeptide.

#### **Resin-O-D-Leu-D-3-(4-Thiazoyl)Ala-3,3-Diphenyl-D-Ala-Lys(Boc)-NH<sub>2</sub>**

The tetrapeptide Resin-O-D-Leu-D-3-(4-Thiazoyl)Ala-3,3-Diphenyl-D-Ala-Lys(Boc)-NH<sub>2</sub> was synthesized following the **“General Fmoc removal”** procedure for SPPS. A positive ninhydrin was used to confirm the completion removal of Fmoc group.

#### **Resin-O-D-Leu-D-3-(4-Thiazoyl)Ala-3,3-Diphenyl-D-Ala-Lys(Boc)-N-Me-Val-Fmoc**

Pentapeptide Resin-O-D-Leu-D-3-(4-Thiazoyl)Ala-3,3-Diphenyl-D-Ala-Lys(Boc)-N-Me-Val-Fmoc was synthesized following **“General peptide coupling”** procedure for SPPS, using Resin-O-D-Leu-D-3-(4-Thiazoyl)Ala-3,3-Diphenyl-D-Ala-Lys(Boc)-NH<sub>2</sub> synthesized from the previous peptide coupling, together with 0.53 g (1.5 mmol, 3.0 equivalents) of Fmoc-N-Me-Val-OH, 0.20 g of HOBt (1.5 mmol, 3.0 equivalents), 0.47 mL of DIC (3.0 mmol, 6.0 equivalents) and 2.5 mL of DMF to generate a concentration of 0.20 M. The coupling reaction was run for 3 hours and a negative ninhydrin test was used to confirm the reaction completion. The reaction mixture was drained to afford the Fmoc-protected resin-bound pentapeptide.

#### **Resin-O-D-Leu-D-3-(4-Thiazoyl)Ala-3,3-Diphenyl-D-Ala-Lys(Boc)-N-Me-Val-NH<sub>2</sub>**

The pentapeptide Resin-O-D-Leu-D-3-(4-Thiazoyl)Ala-3,3-Diphenyl-D-Ala-Lys(Boc)-N-Me-Val-NH<sub>2</sub> was synthesized following the **“General Fmoc removal”** procedure for SPPS. A positive ninhydrin was used to confirm the completion removal of Fmoc group.

#### **HO-D-Leu-D-3-(4-Thiazoyl)Ala-3,3-Diphenyl-D-Ala-Lys(Boc)-N-Me-Val-NH<sub>2</sub>**

The double deprotected linear pentapeptide (DDLp) HO-D-Leu-D-3-(4-Thiazoyl)Ala-3,3-Diphenyl-D-Ala-Lys(Boc)-N-Me-Val-NH<sub>2</sub> underwent cleavage following the **“Resin cleavage of linear peptide”** procedure for SPPS, using a mixed solution of 6 mL of TFE and 6 mL of CH<sub>2</sub>Cl<sub>2</sub>. The resin containing solution was filtered and dried *in vacuo* to yield the DDLp as a white solid (140 mg, overall 33%).

LC/MS (ESI): *m/z* called for C<sub>44</sub>H<sub>63</sub>N<sub>7</sub>O<sub>8</sub>S (M+1) = 850.46, found 850.10.

<sup>1</sup>H NMR (300 MHz, DMSO) δ 8.93-8.86 (s, 1H), 8.45-8.21 (dd, *J* = 7.87, 9.70 Hz, 2H), 8.02-7.73 (dd, *J* = 7.40, 8.63, 2H), 7.37-7.02 (m, 11H), 6.69-6.61 (t, *J* = 4.60 Hz, 1H), 5.42-5.27 (t, *J* = 8.63 Hz, 1H), 4.51-4.41 (m, 1H), 4.34-4.27 (d, *J* = 11.82 Hz, 1H), 4.25-4.20 (m, 1H), 4.13-4.06 (m, 1H), 3.14-3.04 (dd, *J* = 4.60, 5.91 Hz, 1H), 2.92-2.82 (m, 1H), 2.81-2.75 (d, *J* = 5.91 Hz, 1H), 2.74-2.68 (m, 2H), 2.24-2.17 (s, 3H), 1.92-1.76 (m, 1H), 1.53-1.32 (m, 13H), 1.14-1.00 (m, 2H), 0.92-0.75 (m, 16H).

#### **cyclo-D-Leu-D-3-(4-Thiazoyl)Ala-3,3-Diphenyl-D-Ala-Lys(Boc)-N-Me-Val (Compound 7\_TagII)**

Macrocyclization of 0.11 g DDLp compound 7 (0.13 mmol, 1.0 equivalent) was achieved using 0.021 g of TBTU (0.065 mmol, 0.50 equivalent), 0.017 g of HATU (0.065 mmol, 0.50 equivalent), 0.019 g of DMTMM (0.065 mmol, 0.50 equivalent), 0.27 mL of DIPEA (1.55 mmol, 12.0 equivalents) in anhydrous CH<sub>2</sub>Cl<sub>2</sub> (129 mL, 0.001M) following **“Macrocyclization procedure (syringe pump)”** procedure. The reaction was stirred overnight and the reaction was monitored via TLC and LC/MS. Upon completion, the reaction mixture was subjected to acid-base wash to afford crude product, which was purified via flash column chromatography on silica gel using an ethyl acetate-hexane gradient system, followed by purification via HPLC to yield

compound **7\_TagII** as white solid (23 mg, 21.4%).

LC/MS (ESI):  $m/z$  called for  $C_{44}H_{61}N_7O_7S$  ( $M+1$ ) = 832.44, found 832.20.

$^1H$  NMR (500 MHz,  $CDCl_3$ )  $\delta$  7.37-7.14 (m, 15H), 5.30-5.20 (m, 1H), 4.90-4.45 (m, 1H), 4.03 (d,  $J = 9.8$  Hz, 1H), 3.80-3.77 (m, 2H), 3.67-3.64 (m, 12H), 3.59-3.58 (m, 2H), 3.43 (s, *br*, 1H), 3.26-3.03 (m, 6H), 3.00-2.80 (m, 11H), 2.57-2.48 (m, 4H), 2.41-2.28 (m, 3H), 2.03 (s, 1H), 1.83-1.64 (m, 5H), 1.56-1.35 (m, 5H), 0.96-0.77 (m, 12H).

### Scheme 5: Synthesis of compound **7\_TagII**

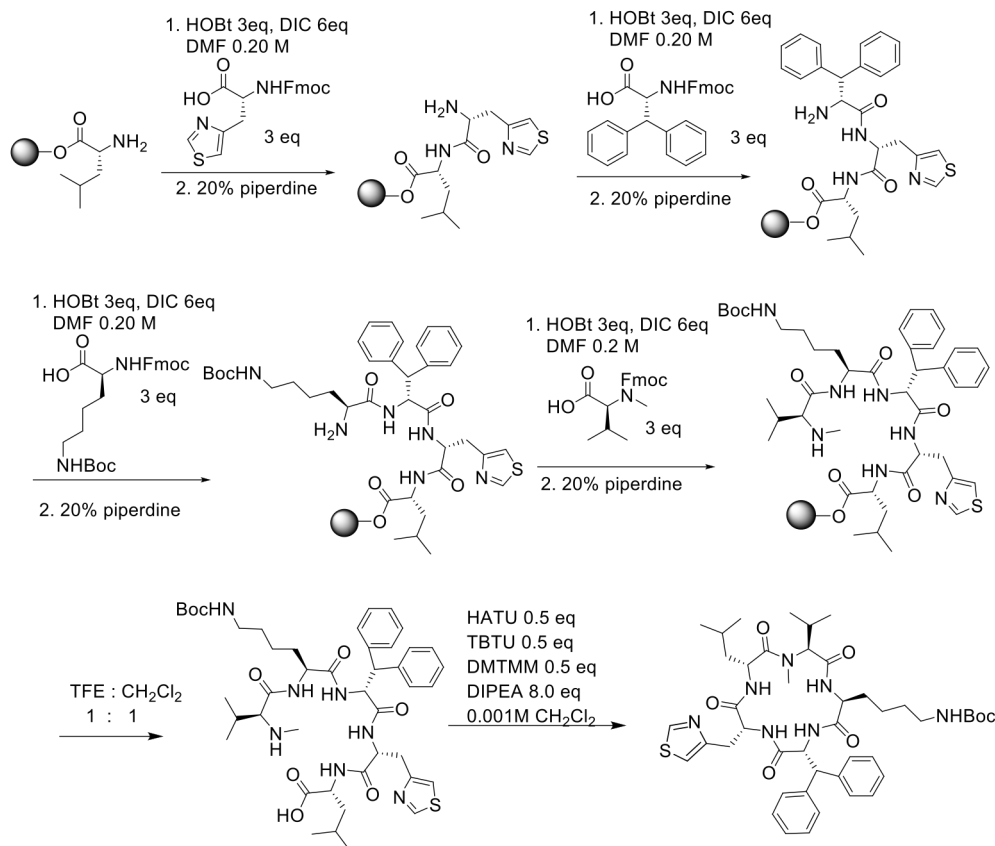

### Synthesis of biotinylated compound **7\_TagII**

#### Boc removal

The Boc protecting group of compound **7\_TagII** was removed following “**Boc removal**” procedure, utilizing a mixture of TFA/ $CH_2Cl_2$  (1:4, 0.1 M) and anisole (2.0 equivalents) to generate free amines at lysine residue. The free amine was taken to the subsequent biotinylation reaction without purification.

LC/MS (ESI):  $m/z$  called for  $C_{39}H_{53}N_7O_5S$  ( $M+1$ ) = 732.38, found 732.00.

#### Peg-Biotin attachment

The biotinylated compound **7\_TagII** was afforded by using “**Peg-Biotin attachment**” procedure, utilizing 23 mg (0.031 mmol, 1.0 equivalent) of deprotected compound **7\_TagII**, 25.9 mg (0.044 mmol, 1.4 equivalents) of NHS-PEG<sub>4</sub>-Biotin, 43.8  $\mu$ L (0.25 mmol, 8.0 equivalents) of DIPEA in 314  $\mu$ L of  $CH_2Cl_2$ . The reaction mixture was stirred for 4 hours and monitored via LC/MS. Upon completion, the crude product was purified using preparative HPLC to generate pure biotinylated compound in 33.1 % yield (12 mg) as white solid.

$R_f$ : 0.71 (EtOAc:MeOH = 0.60:0.40)

LC/MS (ESI):  $m/z$  called for  $C_{60}H_{88}N_{10}O_{12}S_2$  ( $M+1$ ) = 1205.60, found 1205.05.

HRMS (ESI-TOF):  $M+Na^+$ , found 1227.5926  $C_{60}H_{88}N_{10}O_{12}S_2$  requires 1204.6025.

$^1H$  NMR (600 MHz, MeOD):  $\delta$  9.34 (m, 1H), 7.28-7.04 (m, 11H), 5.19-5.16 (m, 1H), 4.54-4.48 (m, 2H),

4.43-4.41 (m, 1H), 4.25-4.19 (m, 2H), 4.07 (s, 1H), 4.02 (s, 1H), 3.26 (t,  $J = 6.4$  Hz, 3H), 3.53-3.49 (m, 14H), 3.45-3.42 (m, 3H), 3.28-3.24 (m, 3H), 2.99-2.95 (m, 2H), 2.82 (s, 1H), 2.75 (s, 3H), 2.35-2.32 (m, 3H), 2.17-2.11 (m, 4H), 1.82-1.76 (m, 1H), 1.68-1.40 (m, 12H), 1.29-1.19 (m, 5H), 0.82-0.72 (m, 12H).  
 $^{13}\text{C}$  NMR (150 MHz, MeOD):  $\delta$  174.77, 172.44, 171.59, 170.93, 170.16, 170.03, 161.91, 156.12, 148.31, 140.75, 140.63, 128.47, 128.39, 128.34, 128.26, 128.23, 128.13, 128.09, 127.90, 127.76, 126.91, 126.62, 118.49, 70.56, 70.18, 70.16, 70.11, 70.06, 69.95, 69.93, 69.87, 69.19, 66.91, 63.71, 62.91, 58.03, 56.95, 56.86, 52.68, 48.45, 48.16, 39.01, 38.86, 36.25, 35.31, 34.91, 29.92, 29.09, 28.74, 28.45, 28.39, 28.11, 26.74, 25.47, 25.30, 25.06, 24.34, 23.13, 22.01, 21.17, 21.14, 18.75, 18.72, 17.84.

### Scheme 6: Synthesis of biotinylated compound 7\_TagII

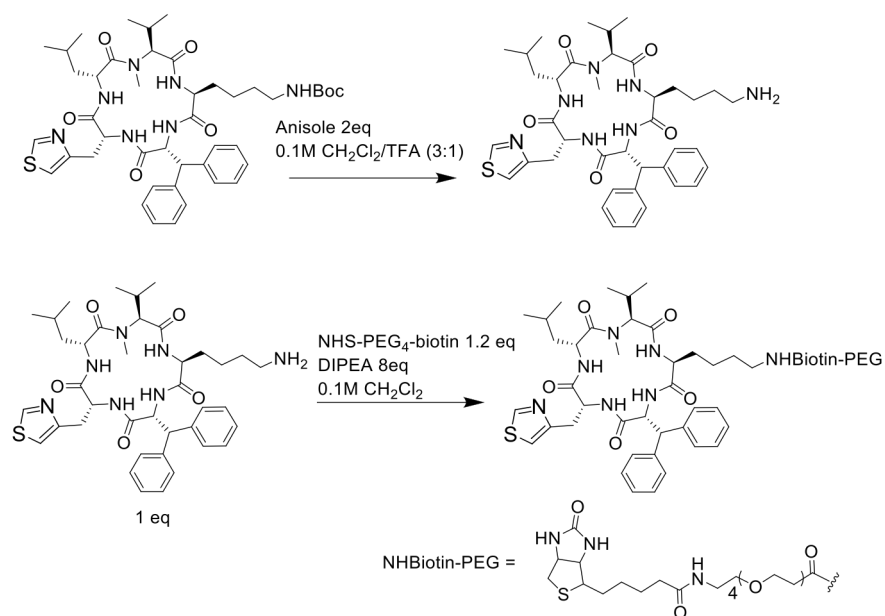

## Supporting Information

### Compound 1: LCMS of DDLP HO-Leu-N-Me-Val-D-Leu-D-Phe-3,3-Diphenyl-D-Ala-NH<sub>2</sub>

3/02/2014 20:40:30 1 / 1

#### ==== Shimadzu LCMSsolution Analysis Report ====

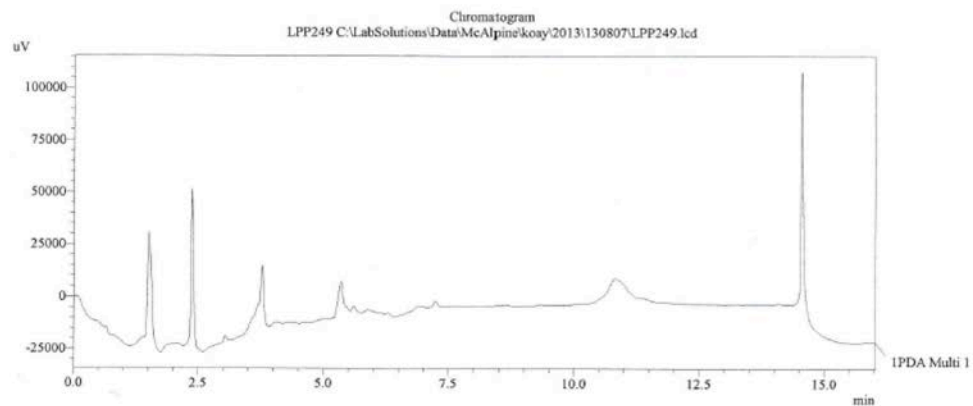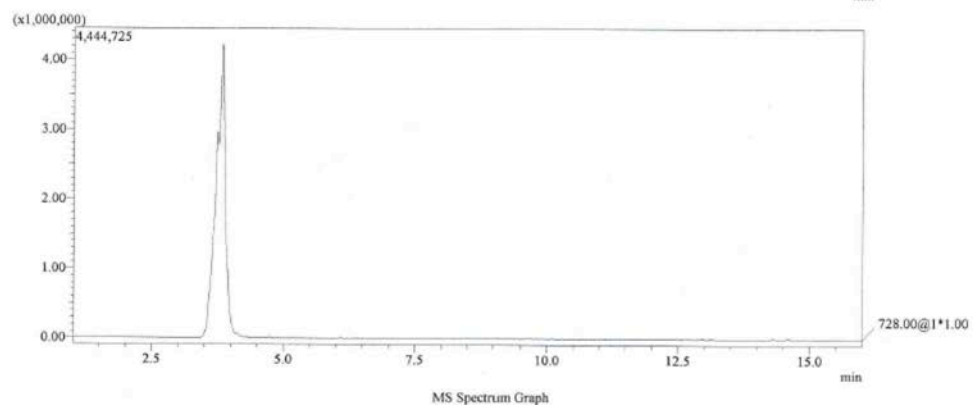

Ret. Time: 3.817 (Scan#: 170)

BG Mode: ?

Mass Peaks: 1729 Base Peak: 728.15 (3746695) Polarity: Pos Segment: 1 - Event: 1

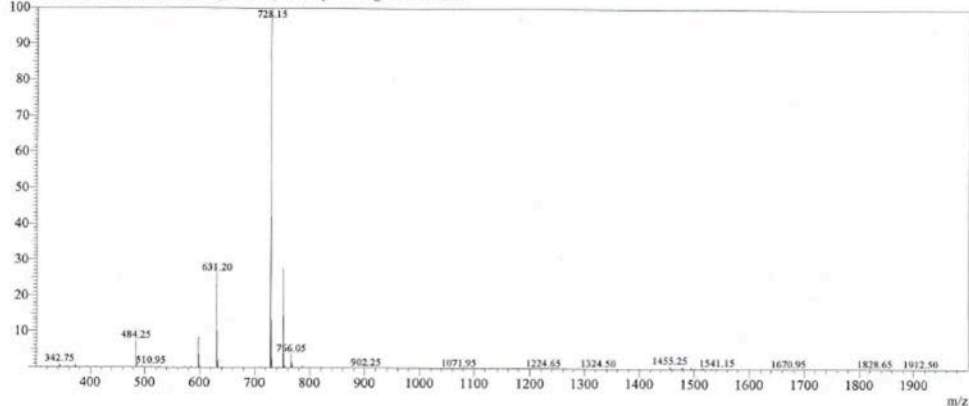

C:\LabSolutions\Data\McAlpine\koay\2013\130807\LPP249.lcd



## Supporting Information

Compound 1:  $^1\text{H}$ NMR of DDLP HO-Leu-N-Me-Val-D-Leu-D-Phe-3,3-Diphenyl-D-Ala-NH $_2$

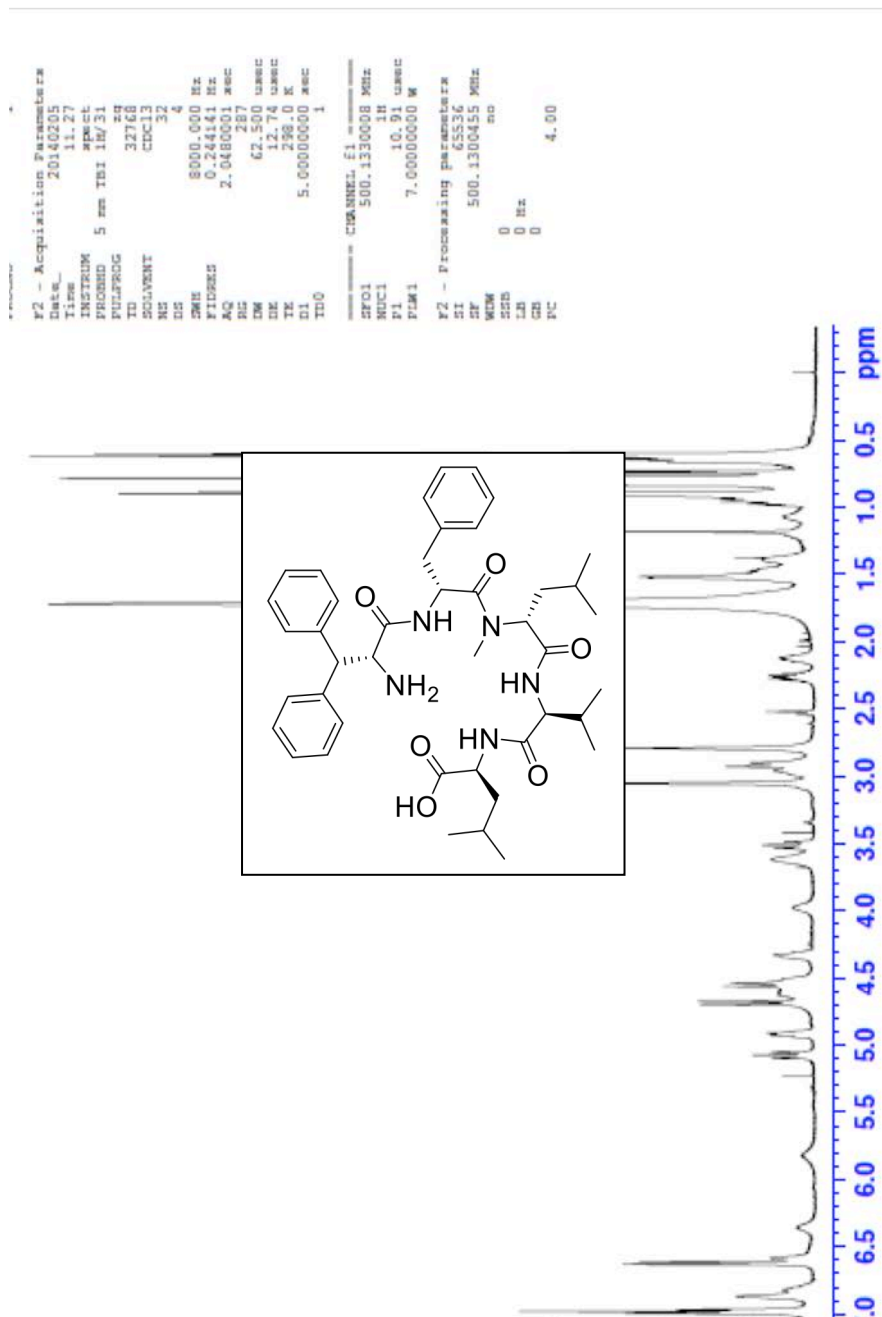

Supporting Information

Compound 1: LCMS of cyclo-Leu-N-Me-Val-D-Leu-D-Phe-3,3-Diphenyl-D-Ala

20/08/2013 08:51:05 1 / 1

==== Shimadzu LCMSsolution Analysis Report ====

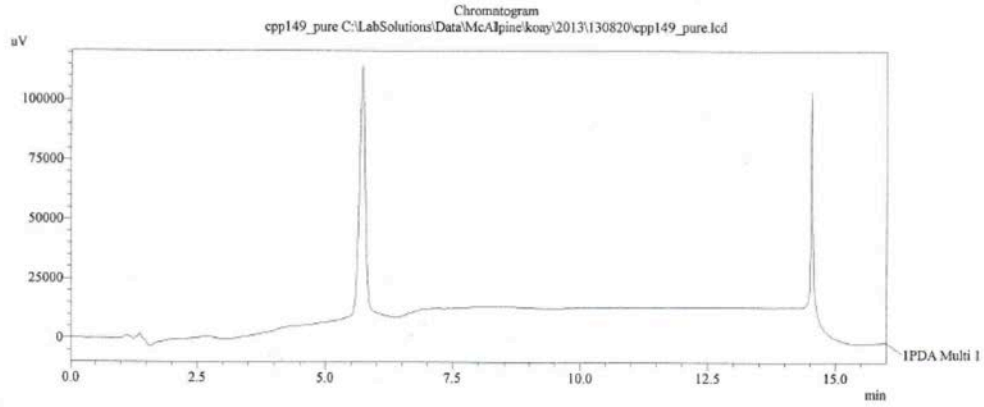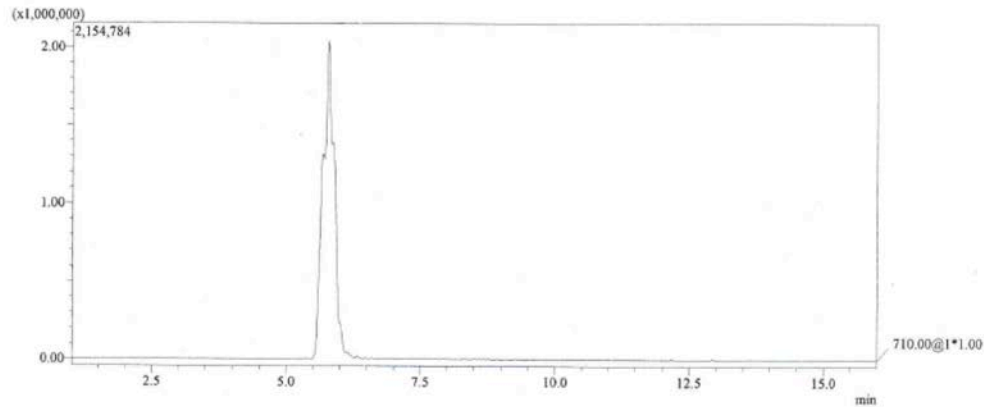

MS Spectrum Graph

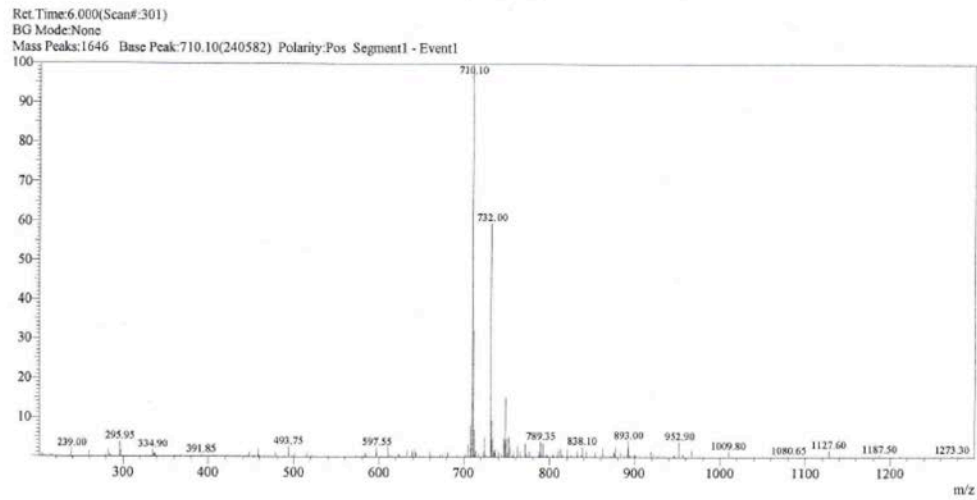

Supporting Information

Compound 1: HRMS of cyclo-Leu-N-Me-Val-D-Leu-D-Phe-3,3-Diphenyl-D-Ala

MS Data from Orbitrap

Full Spectrum

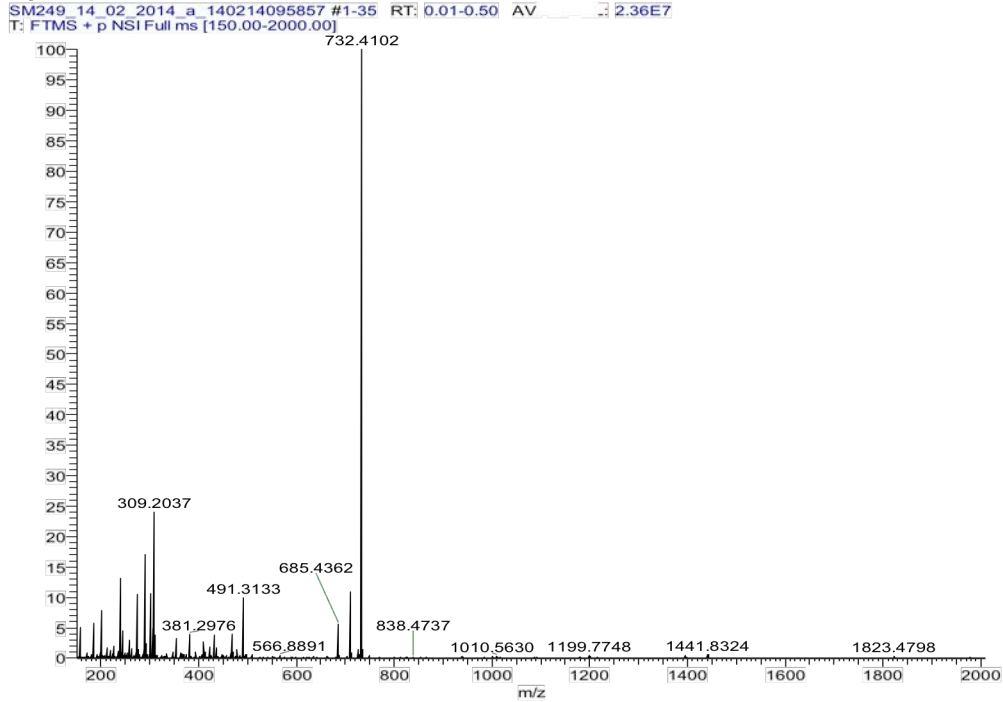

Zoomed Spectrum

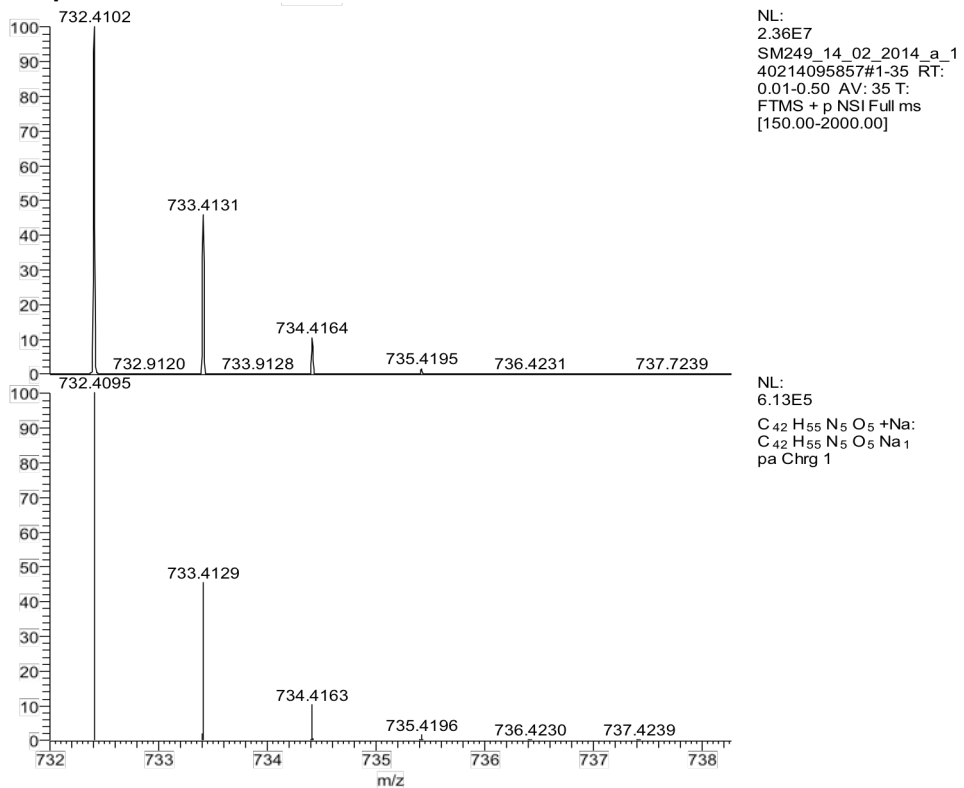



## Supporting Information

### Compound 1: $^{13}\text{C}$ NMR of cyclo-Leu-N-Me-Val-D-Leu-D-Phe-3,3-Diphenyl-D-Ala

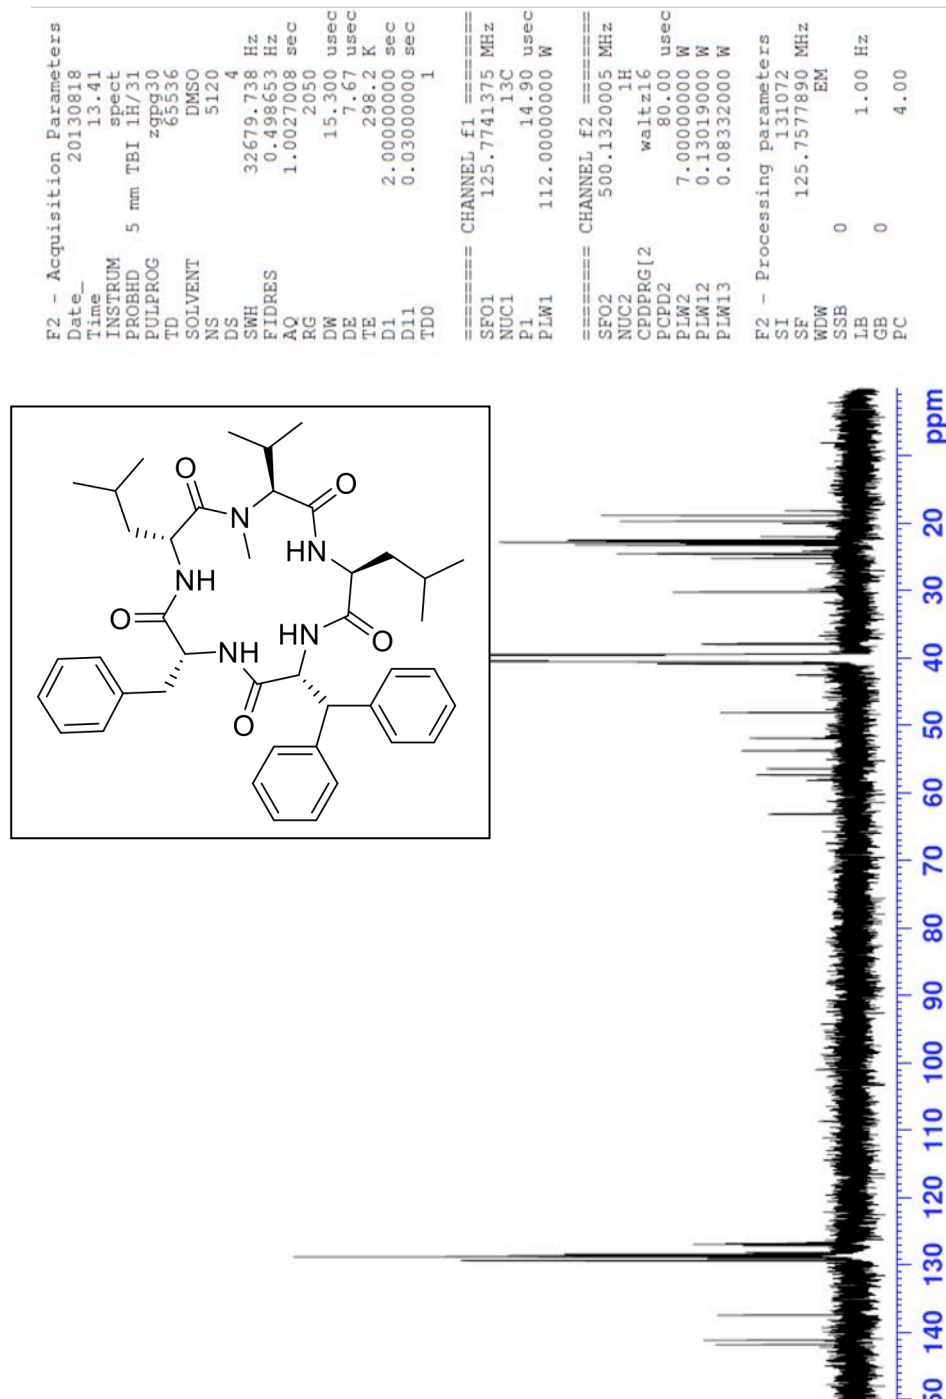





**pound 1-tag: LCMS of DDLP 1-TagII**



# Supporting Information

## Compound 1-tag: <sup>1</sup>H NMR DDLP 1-TagII

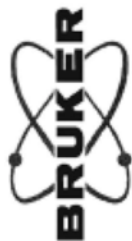

Current Data Parameters  
NAME 131202-sjk  
EXPNO 7  
PROCNO 1

F2 - Acquisition Parameters  
Date\_ 20131202  
Time\_ 13.57  
INSTRUM spect  
PROBHD 5 mm PABBO BB-  
PULPROG zg  
TD 32768  
SOLVENT DMSO  
NS 64  
DS 0  
SWH 4801.537 Hz  
FIRRES 0.146531 Hz  
AQ 3.4122410 sec  
RG 104.133 usec  
DE 9.44 usec  
TE 298.0 K  
D1 5.0000000 sec  
TD0 1

===== CHANNEL f1 =====  
SF01 300.1719511 MHz  
NUC1 1H  
P1 16.56 usec  
PLW1 0.19999981 W

F2 - Processing parameters  
SI 131072  
SF 300.1700024 MHz  
WDW EM  
SSB 0  
LB 0.10 Hz  
GB 0  
PC 1.00

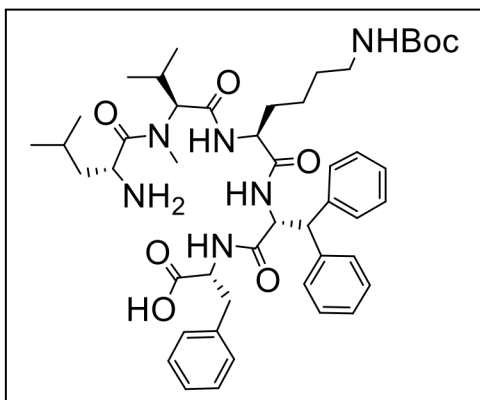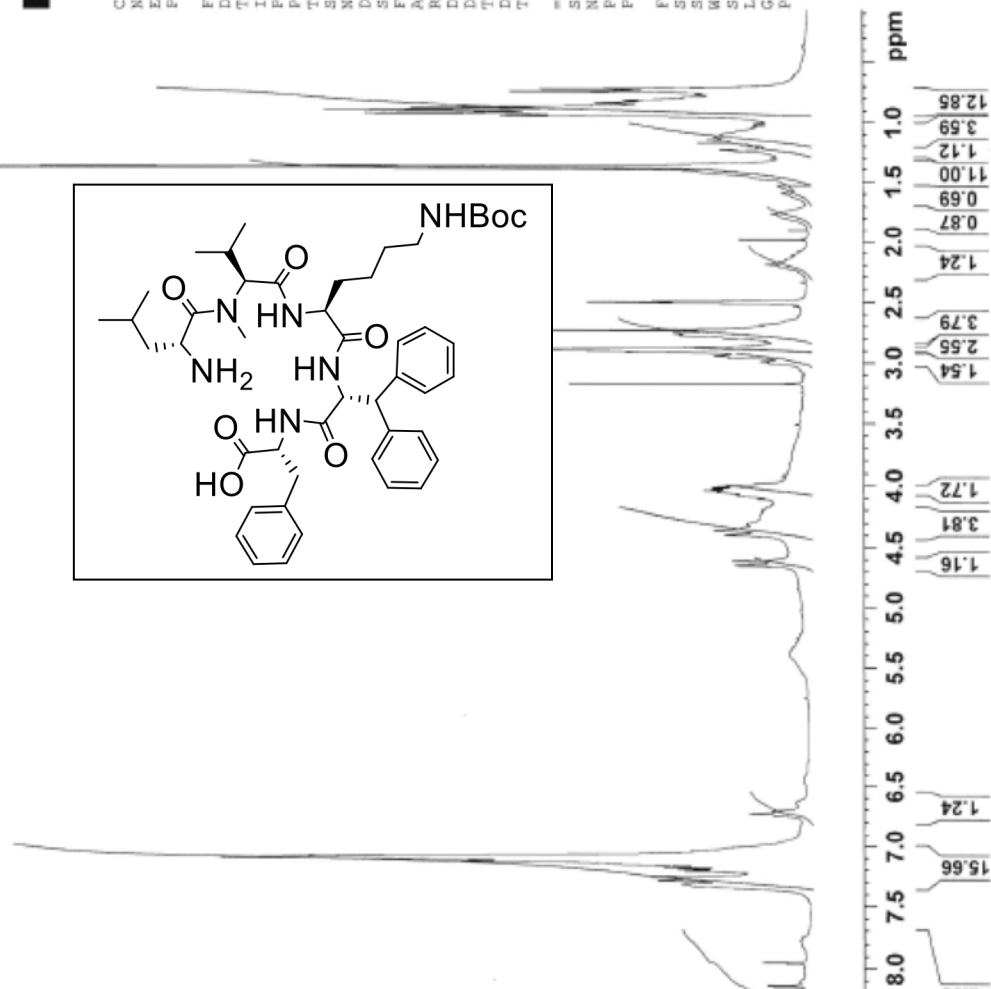

*Supporting Information*

**Compound 1-tag: LCMS of Macrocycle 1-TagII**

7/02/2014 12:37:14 1 / 1

**==== Shimadzu LCMSsolution Analysis Report ====**

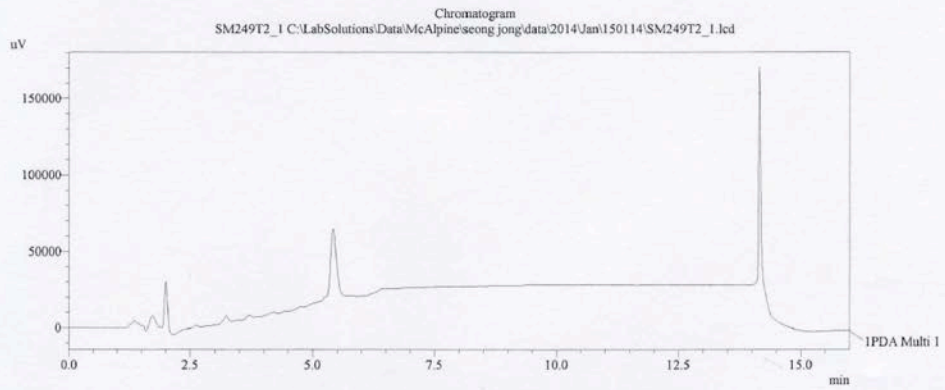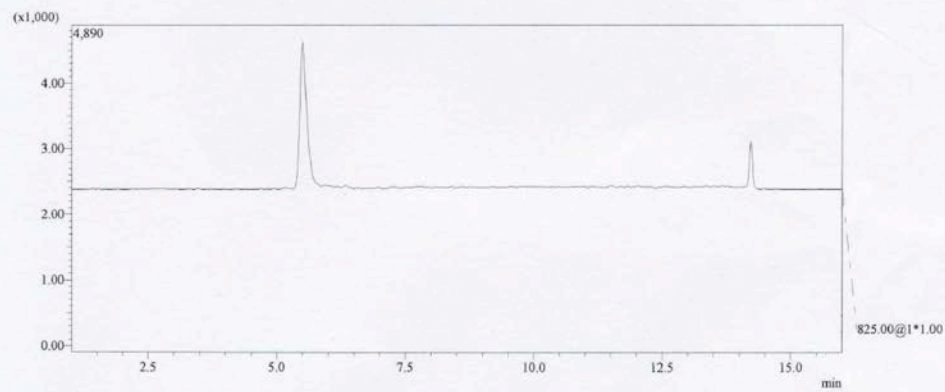

MS Spectrum Graph

Ret.Time:6.400(Scan#:325)

BG Mode?

Mass Peaks:3 Base Peak:847.00(2504) Polarity:Pos Segment1 - Event1

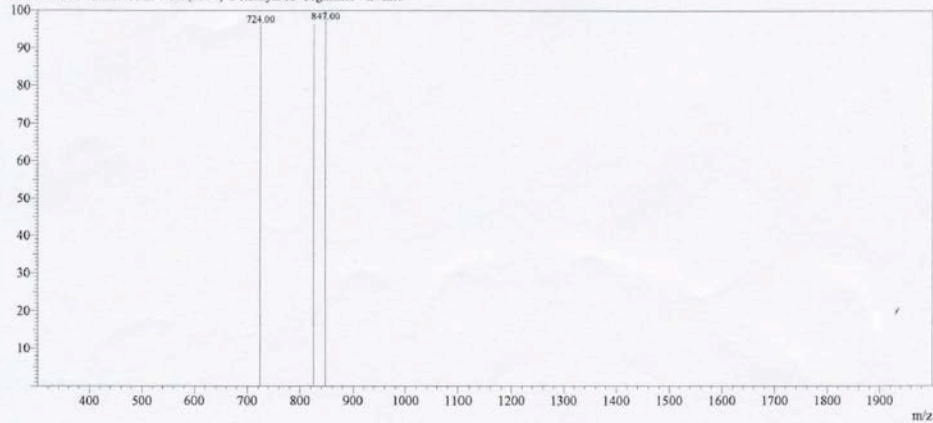

C:\LabSolutions\Data\McAlpine\seong jong\data\2014\Jan\150114\SM249T2\_1.lcd

# Supporting Information

## Compound 1-tag: <sup>1</sup>HNMR Macrocycle 1-TagII

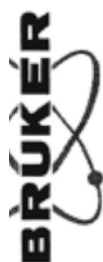

Current Data Parameters  
NAME 140115-sjk  
EXPNO 4  
PROCNO 1

F2 - Acquisition Parameters  
Date\_ 20140116  
Time\_ 1.37  
INSTRUM spect  
PROBHD 5 mm PABBO BB-  
PULPROG zg  
TD 32768  
SOLVENT CDCl3  
NS 64  
DS 0  
SMH 4801.537 Hz  
FIDRES 0.146531 Hz  
AQ 3.4122410 sec  
RG 90.5  
DM 104.133 usec  
DE 9.44 usec  
TE 298.0 K  
D1 5.00000000 sec  
TDO 1

===== CHANNEL f1 =====  
SFO1 300.1719511 MHz  
NUC1 1H  
P1 16.56 usec  
PLM1 8.1999981 W

F2 - Processing parameters  
SI 131072  
SF 300.1700073 MHz  
WDW EM  
SSB 0  
LB 0.10 Hz  
GB 0  
PC 1.00

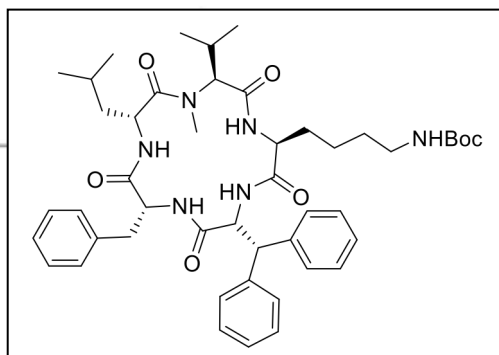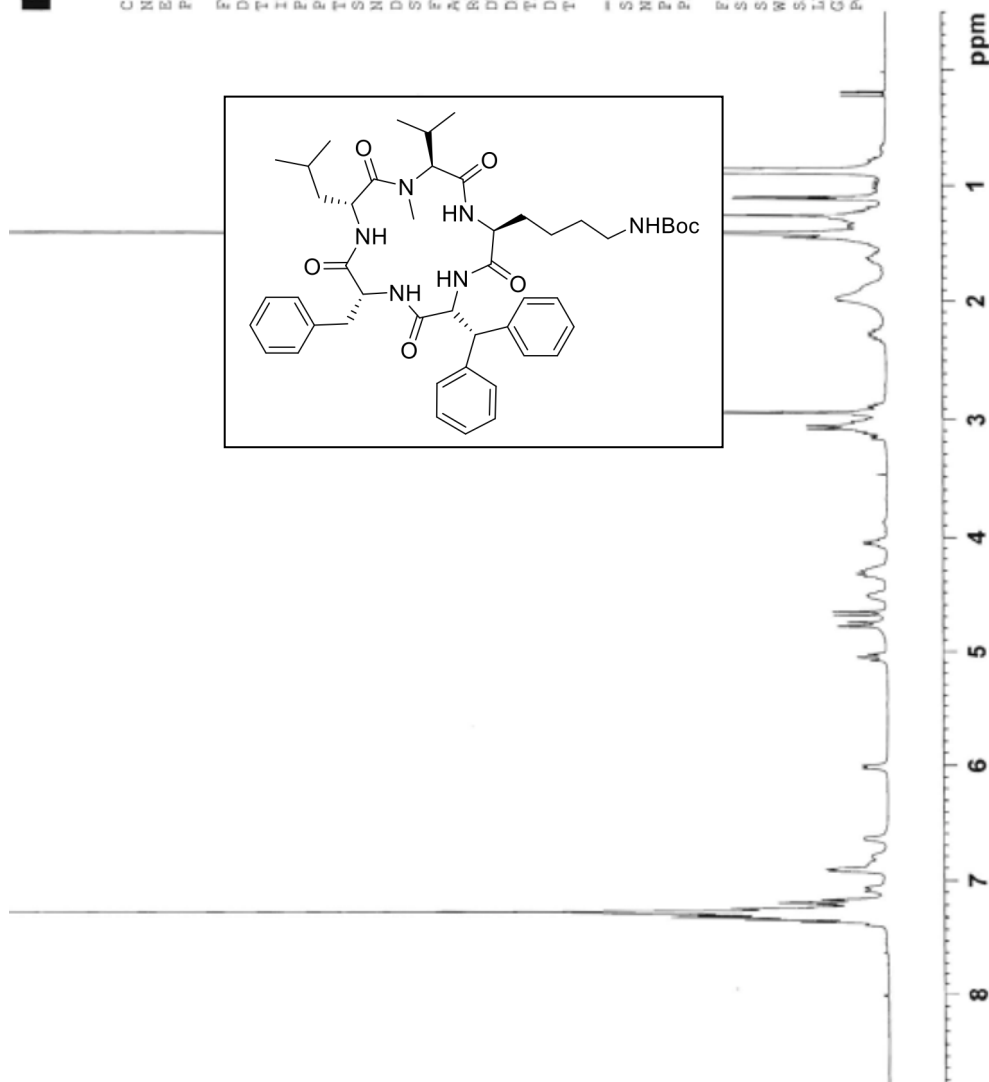

*Supporting Information*

**Compound 1-tag: LCMS of Boc-protected Macrocycle 1-TagII**

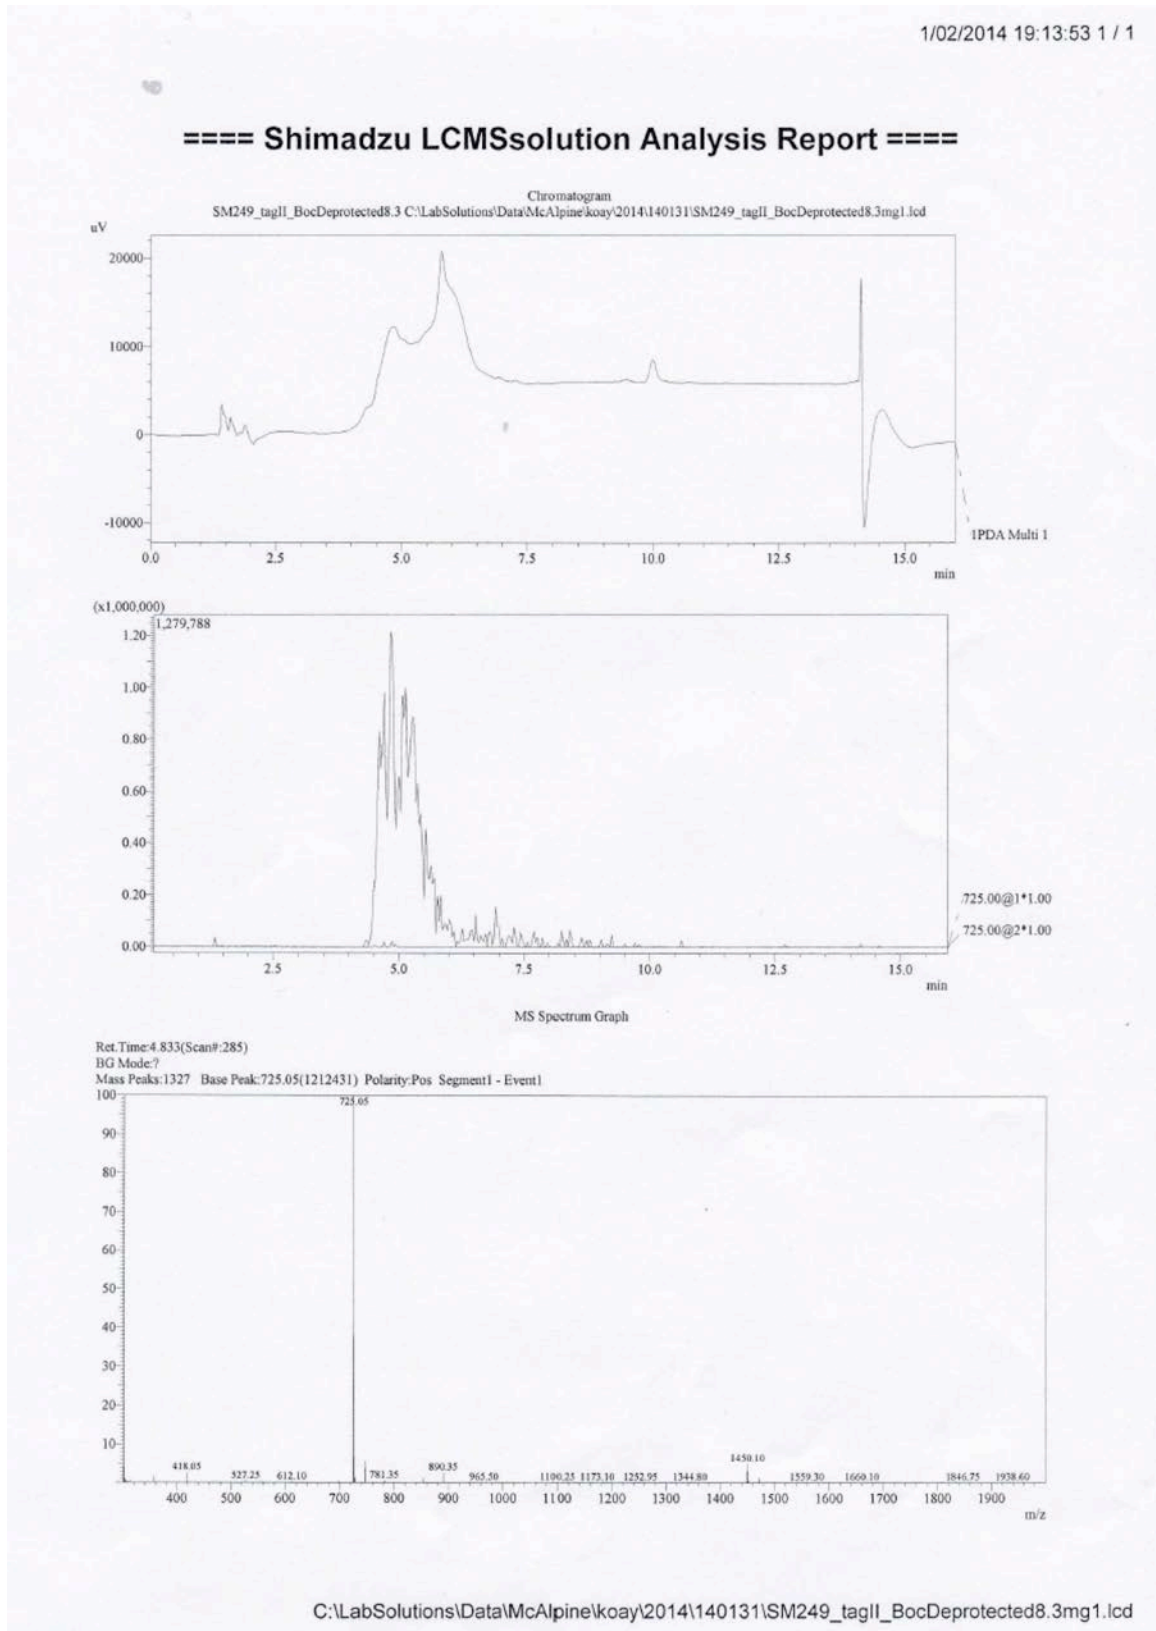

Supporting Information

Compound 1-tag: LCMS of Macrocycle 1-Biotinylated tag

2/02/2014 16:04:25 1 / 1

==== Shimadzu LCMSsolution Analysis Report ====

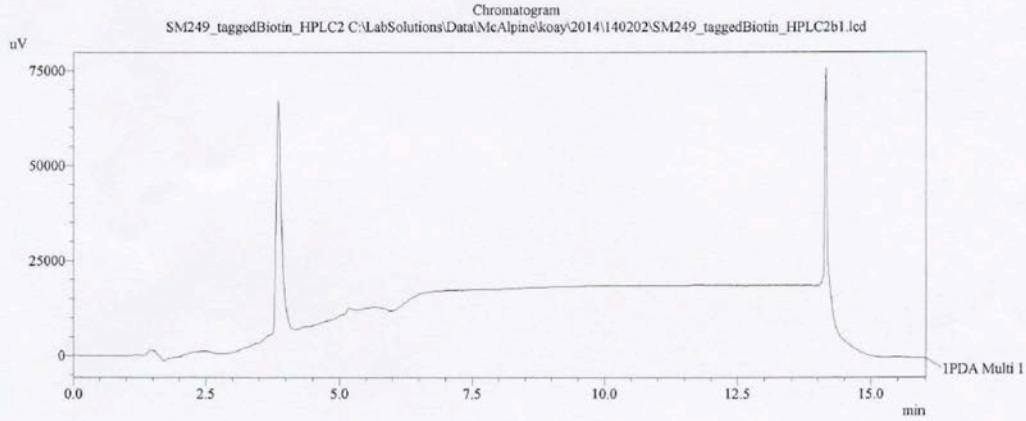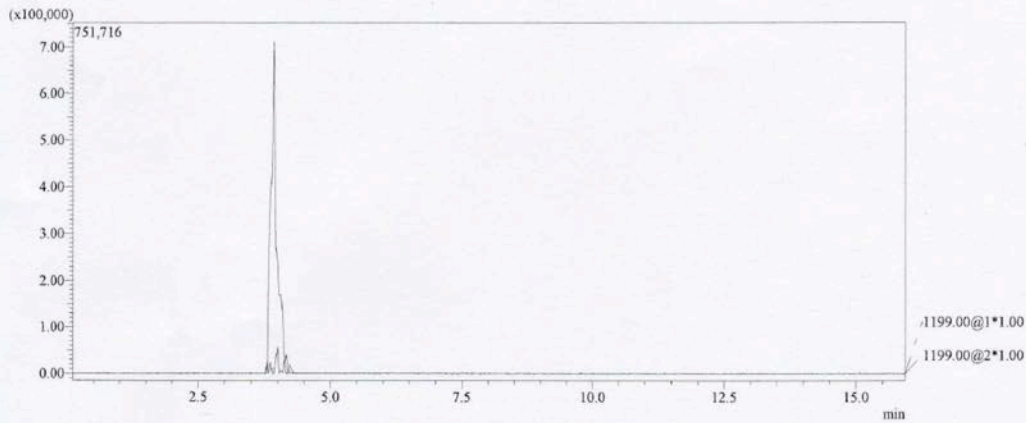

MS Spectrum Graph

Ret Time:3.900(Scan#:229)  
BG Mode:?

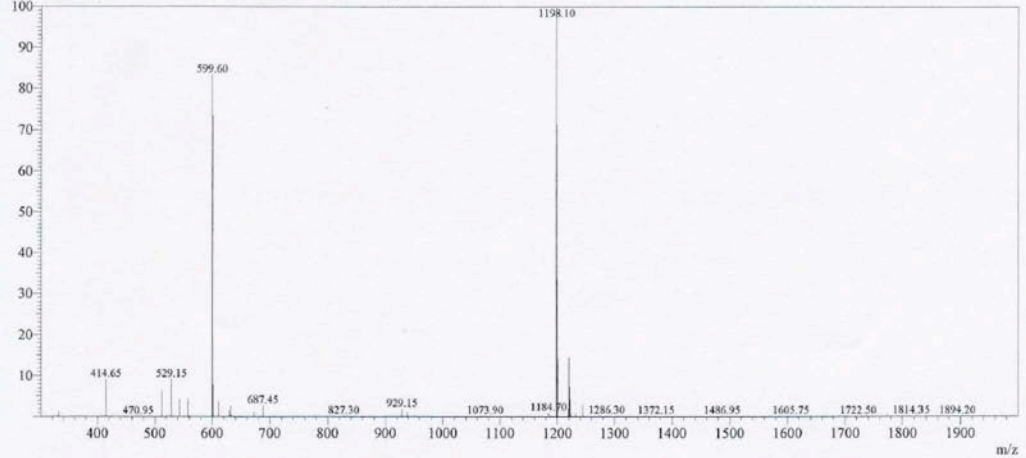

C:\LabSolutions\Data\McAlpine\koay\2014\140202\SM249\_taggedBiotin\_HPLC2b1.lcd

# Supporting Information

## Compound 1-tag: HRMS of Macrocycle 1-Biotinylated tag

### MS Data from Orbitrap

#### Full Spectrum

SM249Tag\_biotin\_14\_02\_2014\_a#1-35 RT: 0.00-0.49 AV: 35 i E7  
T: FTMS + p NSI Full ms [150.00-2000.00]

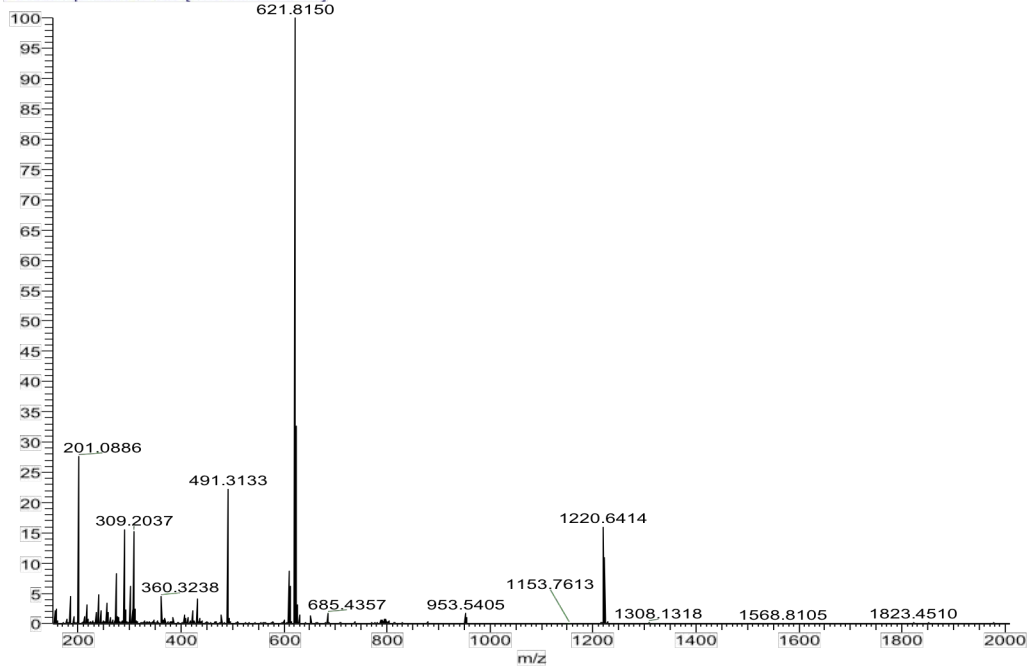

#### Zoomed Spectrum

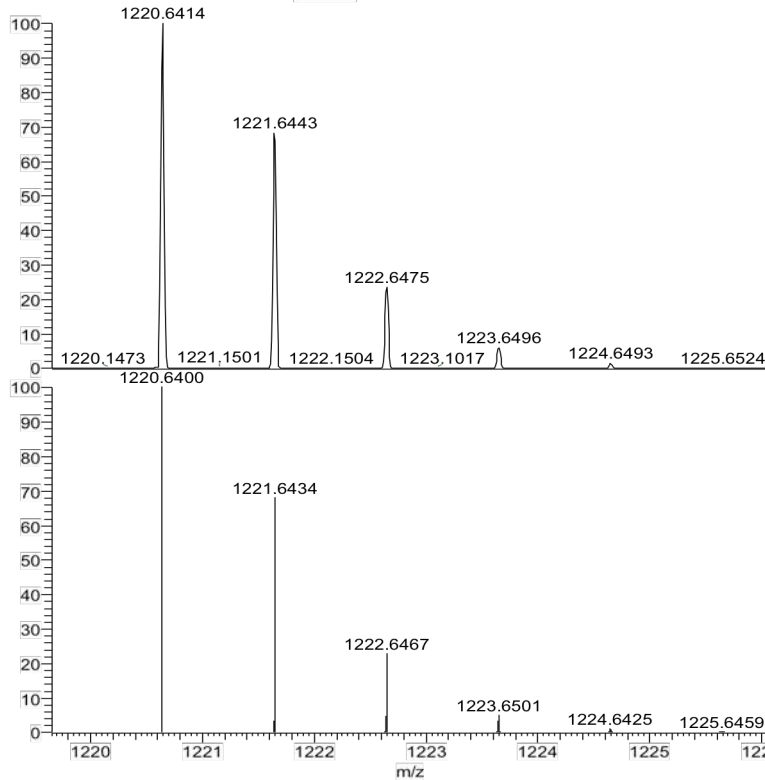

NL:  
1.18E7  
SM249Tag\_biotin\_14\_02\_2014\_a#1-35 RT:  
0.00-0.49 AV: 35 T:  
FTMS + p NSI Full ms  
[150.00-2000.00]

NL:  
4.48E5  
C<sub>63</sub>H<sub>91</sub>N<sub>9</sub>O<sub>12</sub>S +Na:  
C<sub>63</sub>H<sub>91</sub>N<sub>9</sub>O<sub>12</sub>S<sub>1</sub>Na<sub>1</sub>  
pa Chrg 1



*g Information*

Compound 1-tag: <sup>13</sup>CNMR Macrocycle 1-Biotinylated tag

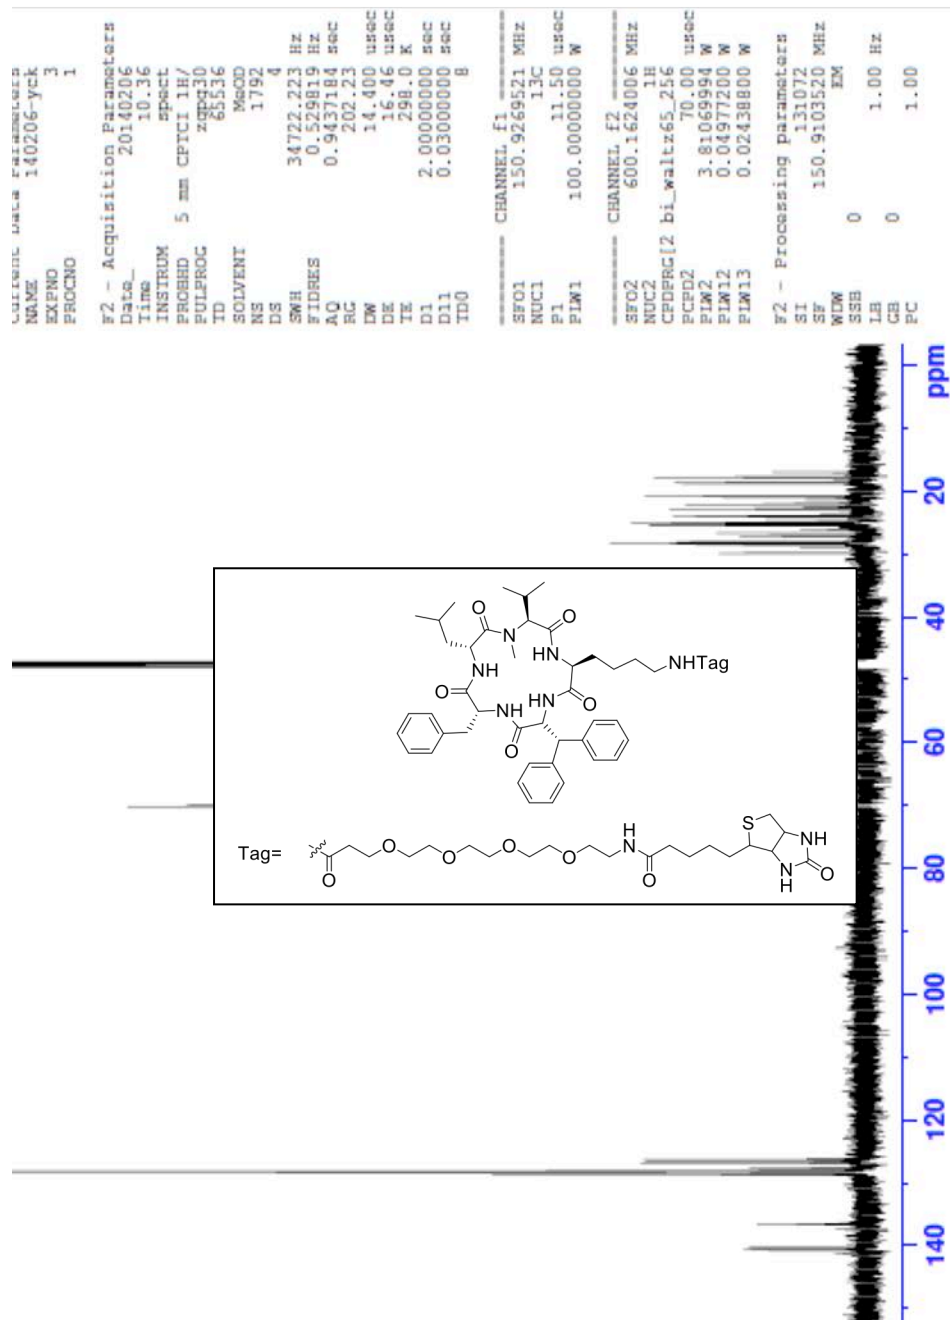



## Supporting Information

### Compound 1-tag: $^1\text{H}$ - $^{13}\text{C}$ HSQC Macrocycle 1-Biotinylated tag

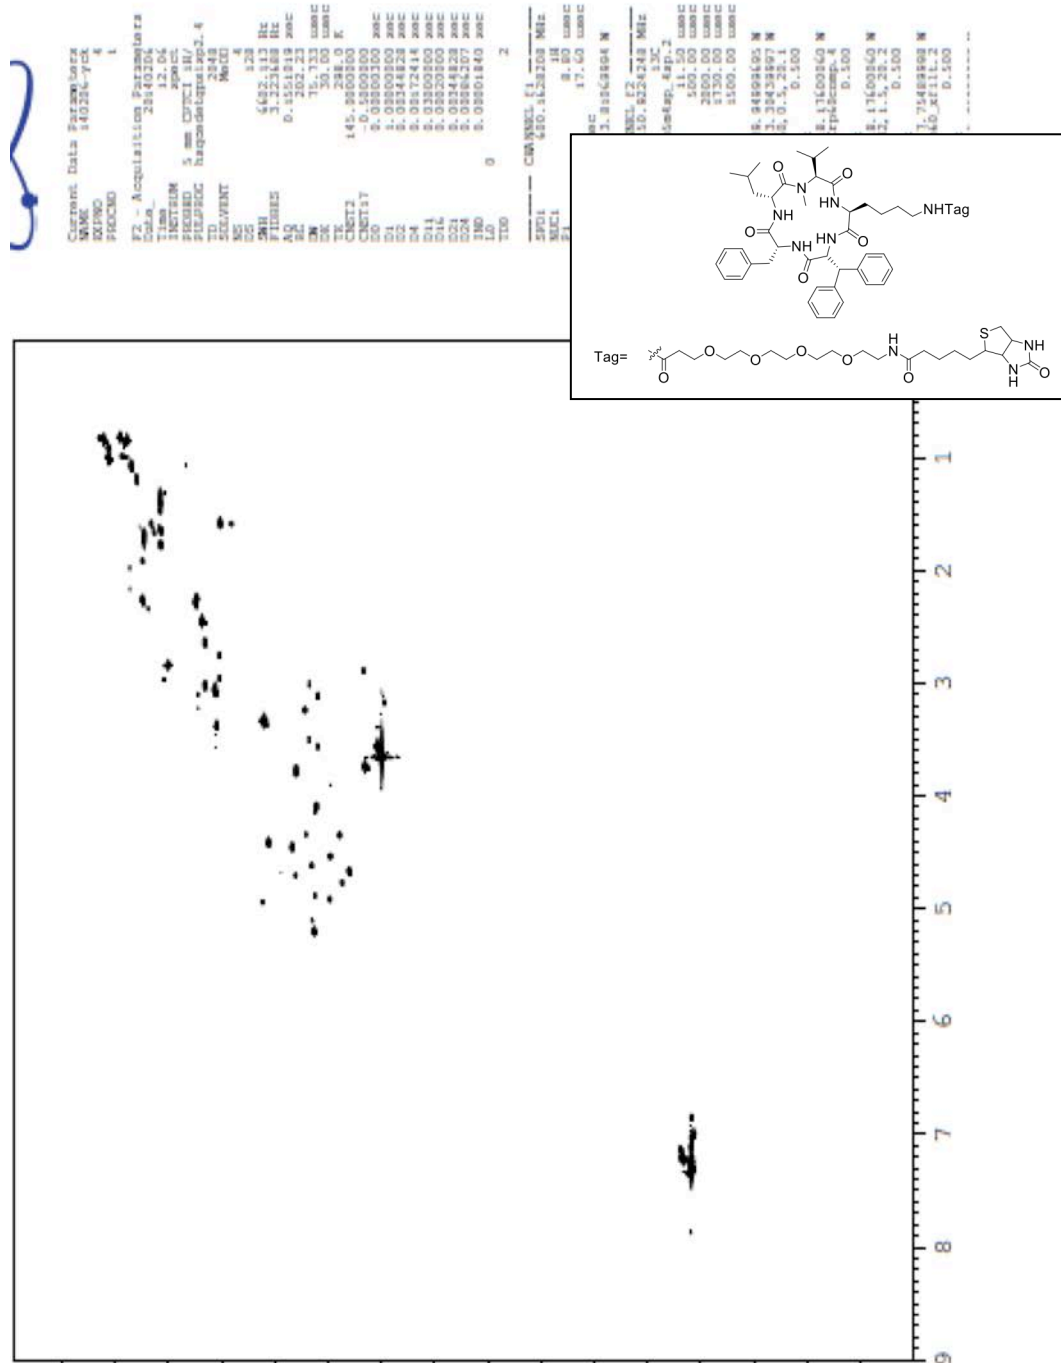

## Supporting Information

### Compound 1-tag: <sup>1</sup>H-<sup>13</sup>C HMBC Macrocycle 1-Biotinylated tag

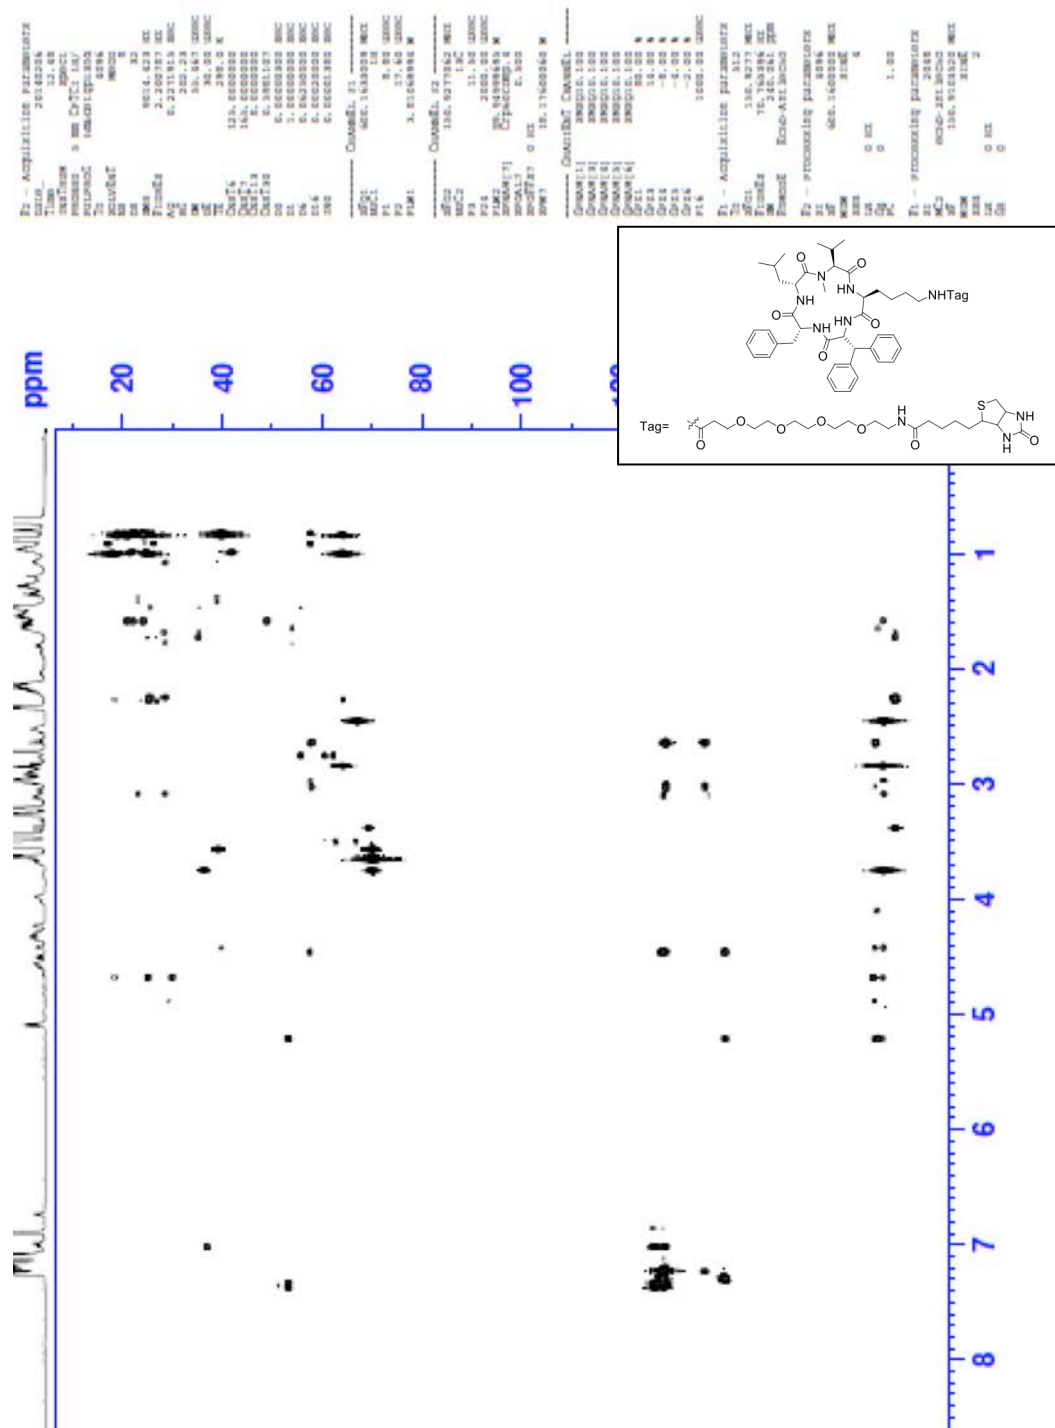

Supporting Information

Compound 2: LCMS of DDLP HO-Leu-N-Me-Val-D-Leu-D-3-(2-Pyridyl)Ala-3,3-Diphenyl-D-Ala-NH<sub>2</sub>

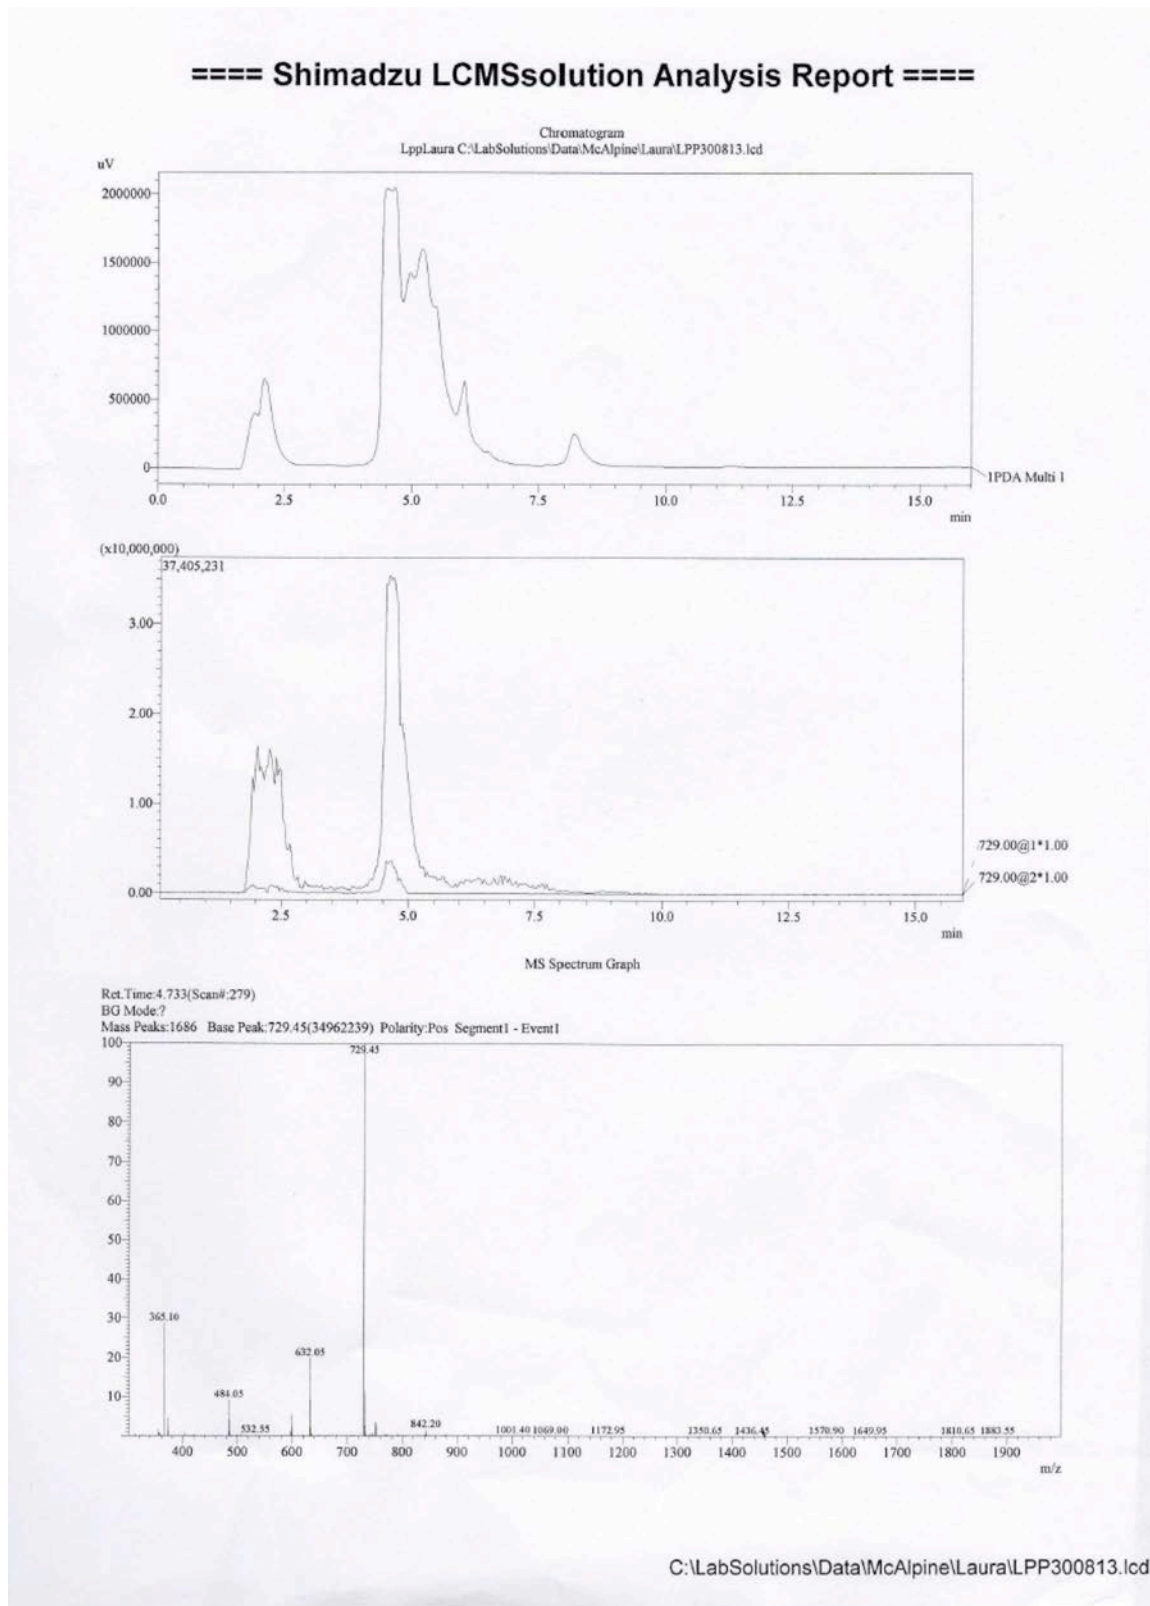

## Supporting Information

### Compound 2: LCMS of *cyclo*-Leu-*N*-Me-Val-D-Leu-D-3-(2-Pyridyl)Ala-3,3-Diphenyl-D-Ala

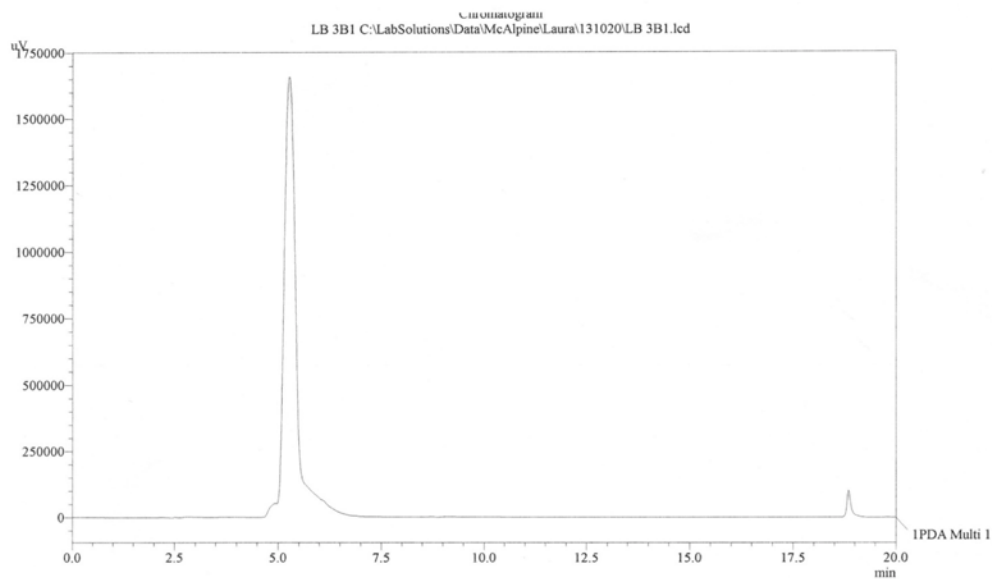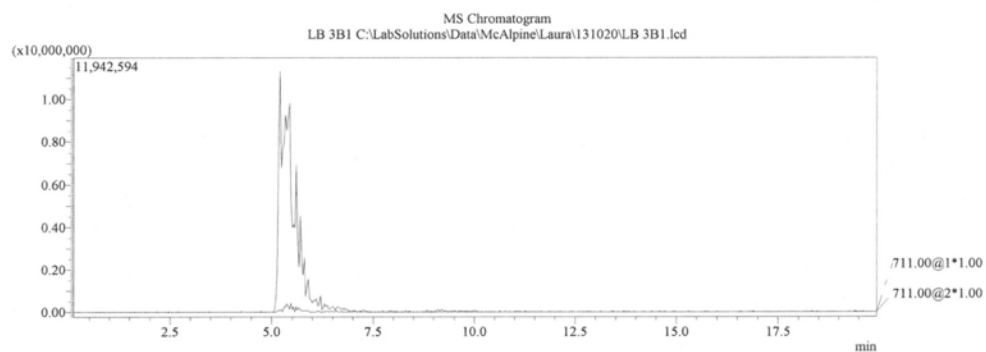

MS Spectrum Graph

Ret.Time:5.300(Scan#:313)

BG Mode?

Mass Peaks:1439 Base Peak:711.05(7944589) Polarity:Pos Segment1 - Event1

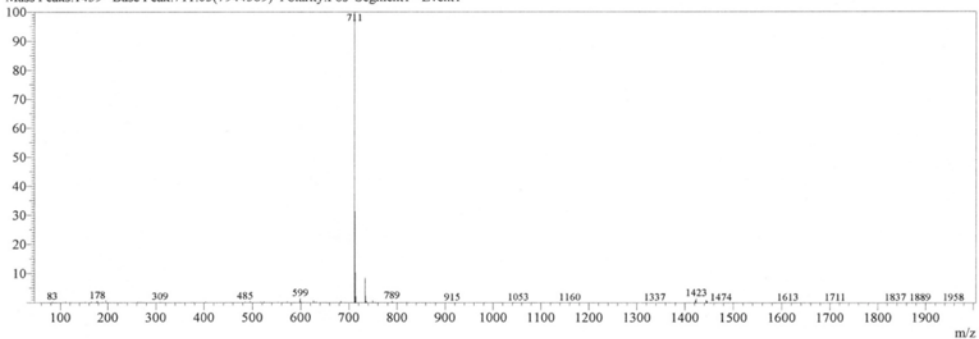

Supporting Information

Compound 2: <sup>1</sup>HNMR of *cyclo*-Leu-*N*-Me-Val-*D*-Leu-*D*-3-(2-Pyridyl)Ala-3,3-Diphenyl-*D*-Ala

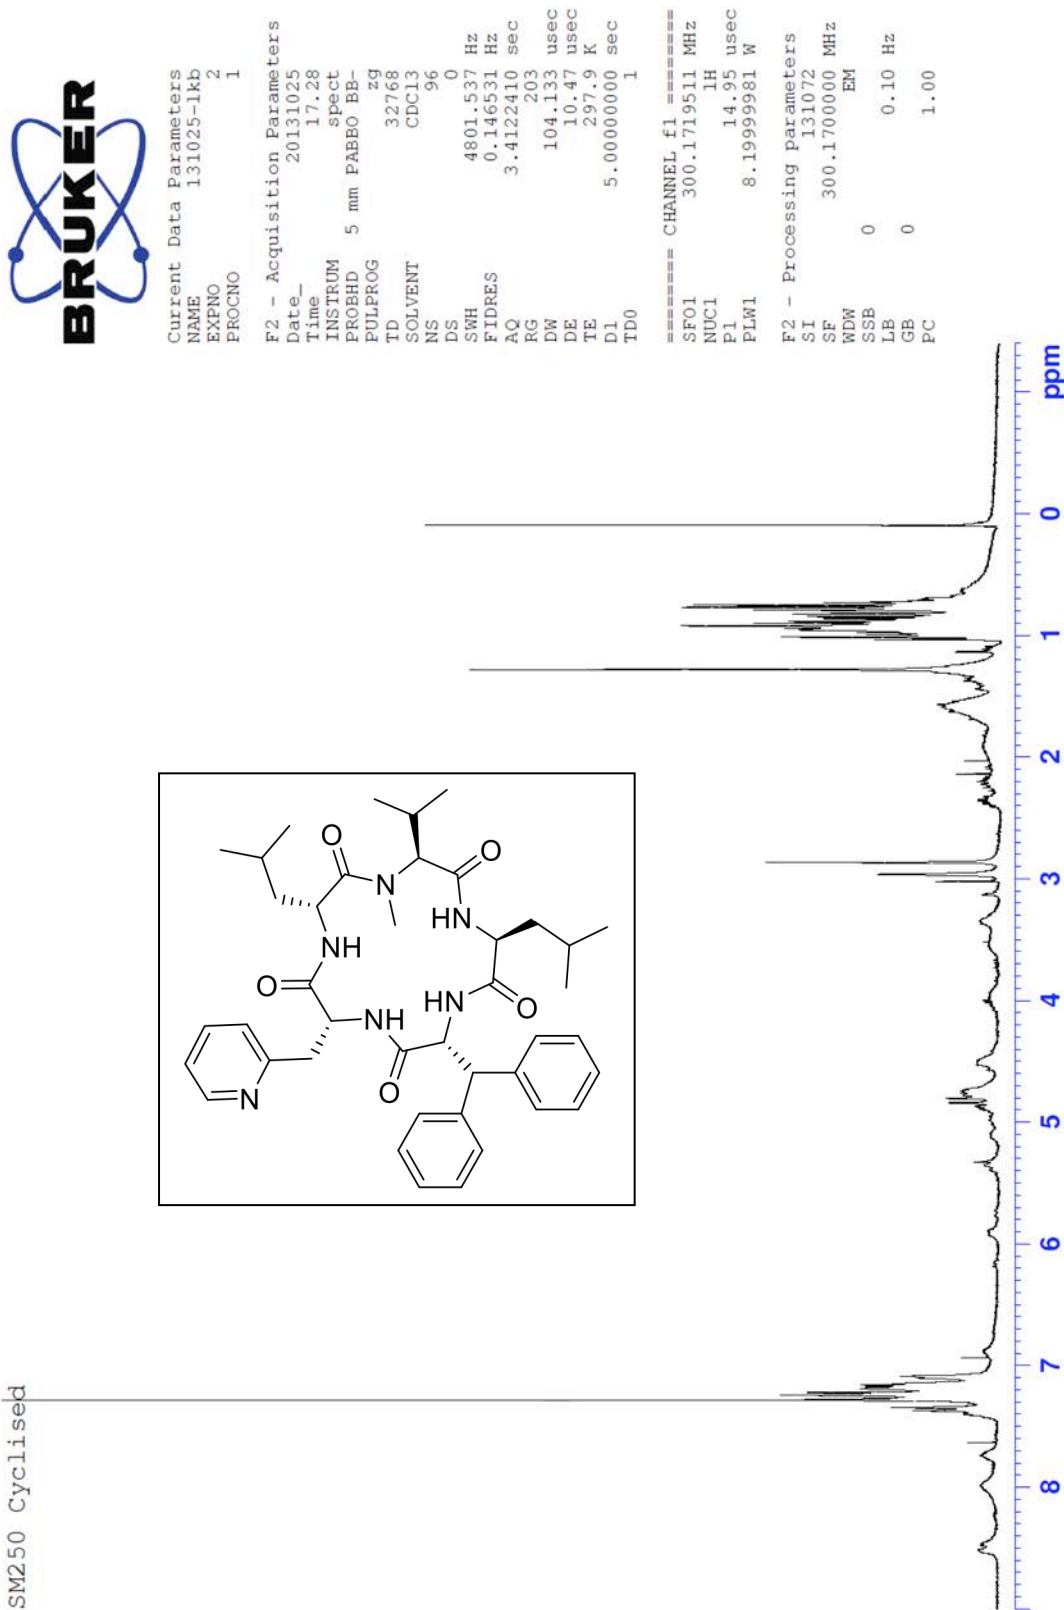

Supporting Information

Compound 3: LCMS of DDLP HO-Leu-N-Me-Val-D-Leu-D-3-(3-Pyridyl)Ala-3,3-Diphenyl-D-Ala-NH<sub>2</sub>

23/04/2014 17:28:05 1 / 1

==== Shimadzu LCMSsolution Analysis Report ====

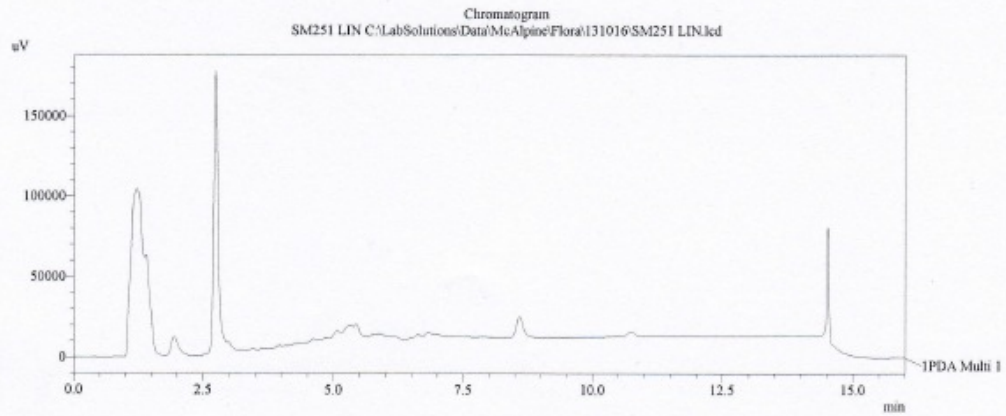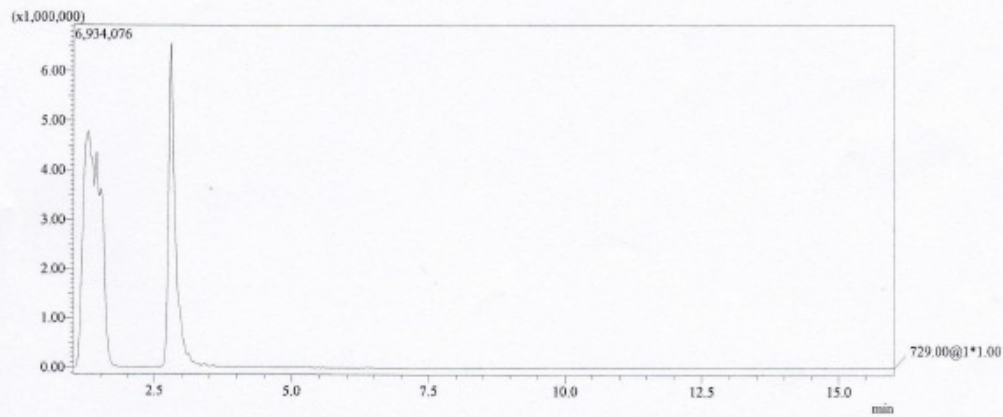

MS Spectrum Graph

Ret. Time: 2.767(Scan#: 107)

BG Mode: 7

Mass Peaks: 1616 (Base Peak: 365.30(11012942) Polarity: Pos Segment: 1 - Event 1

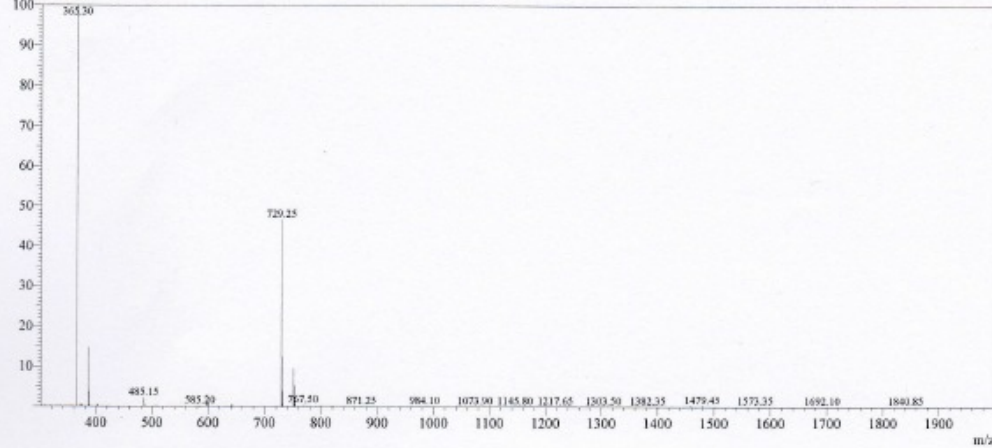

C:\LabSolutions\Data\McAlpine\Flora\131016\SM251.LIN.Icd

## Supporting Information

### Compound 3: LCMS of *cyclo*-Leu-*N*-Me-Val-D-Leu-D-3-(3-Pyridyl)Ala-3,3-Diphenyl-D-Ala

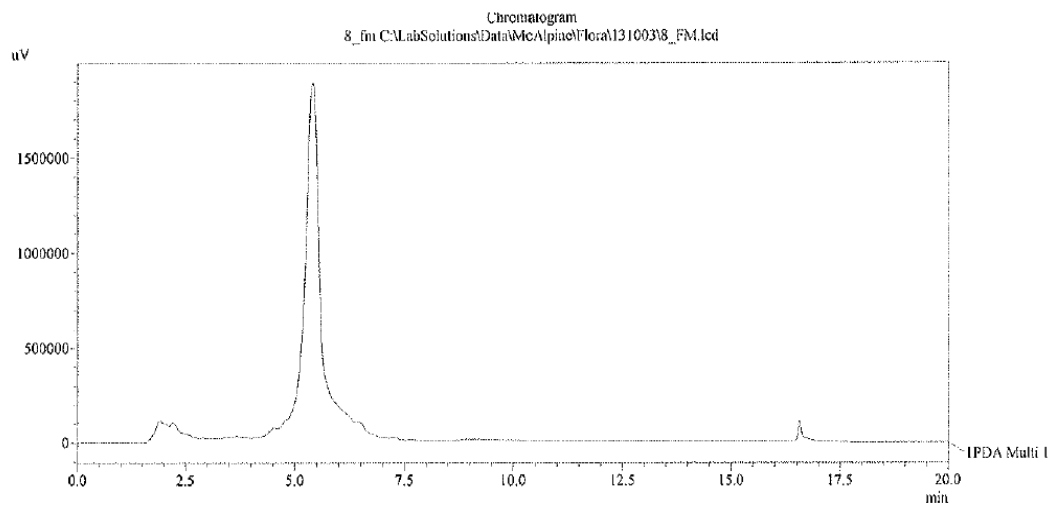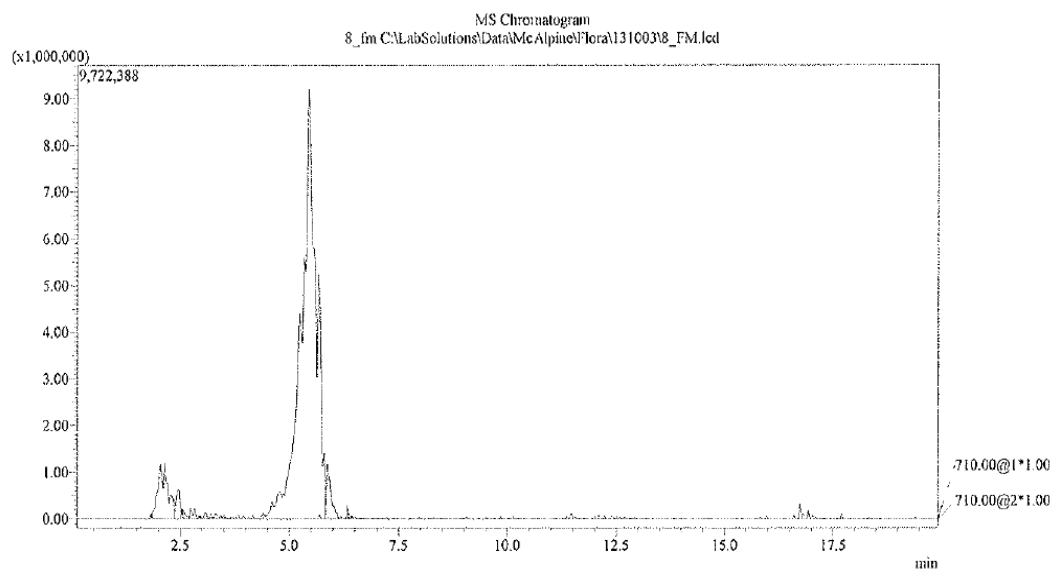

MS Spectrum Graph

Ret. Time: 5.667 (Scan#: 335)

BG Mode: ?

Mass Peaks: 1618 Base Peak: 711.05(10011934) Polarity: Pos Segment 1 - Event 1

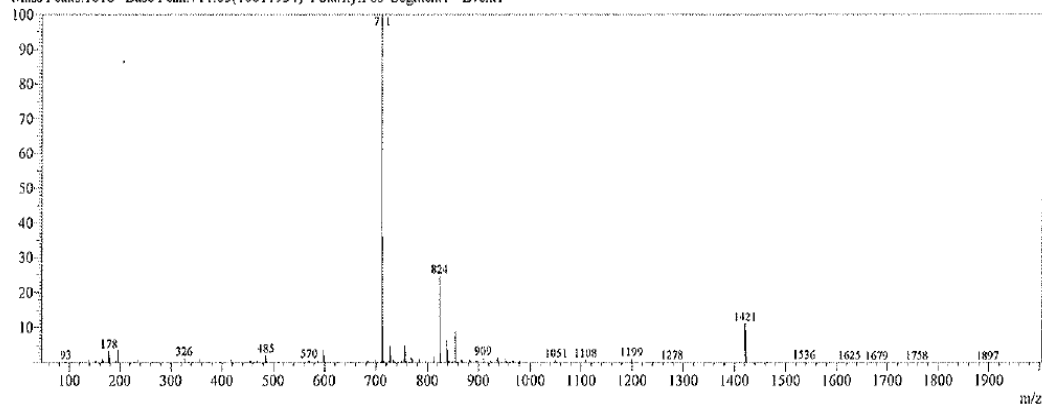

## Supporting Information

### Compound 3: <sup>1</sup>HNMR of *cyclo*-Leu-*N*-Me-Val-*D*-Leu-*D*-3-(3-Pyridyl)Ala-3,3-Diphenyl-*D*-Ala

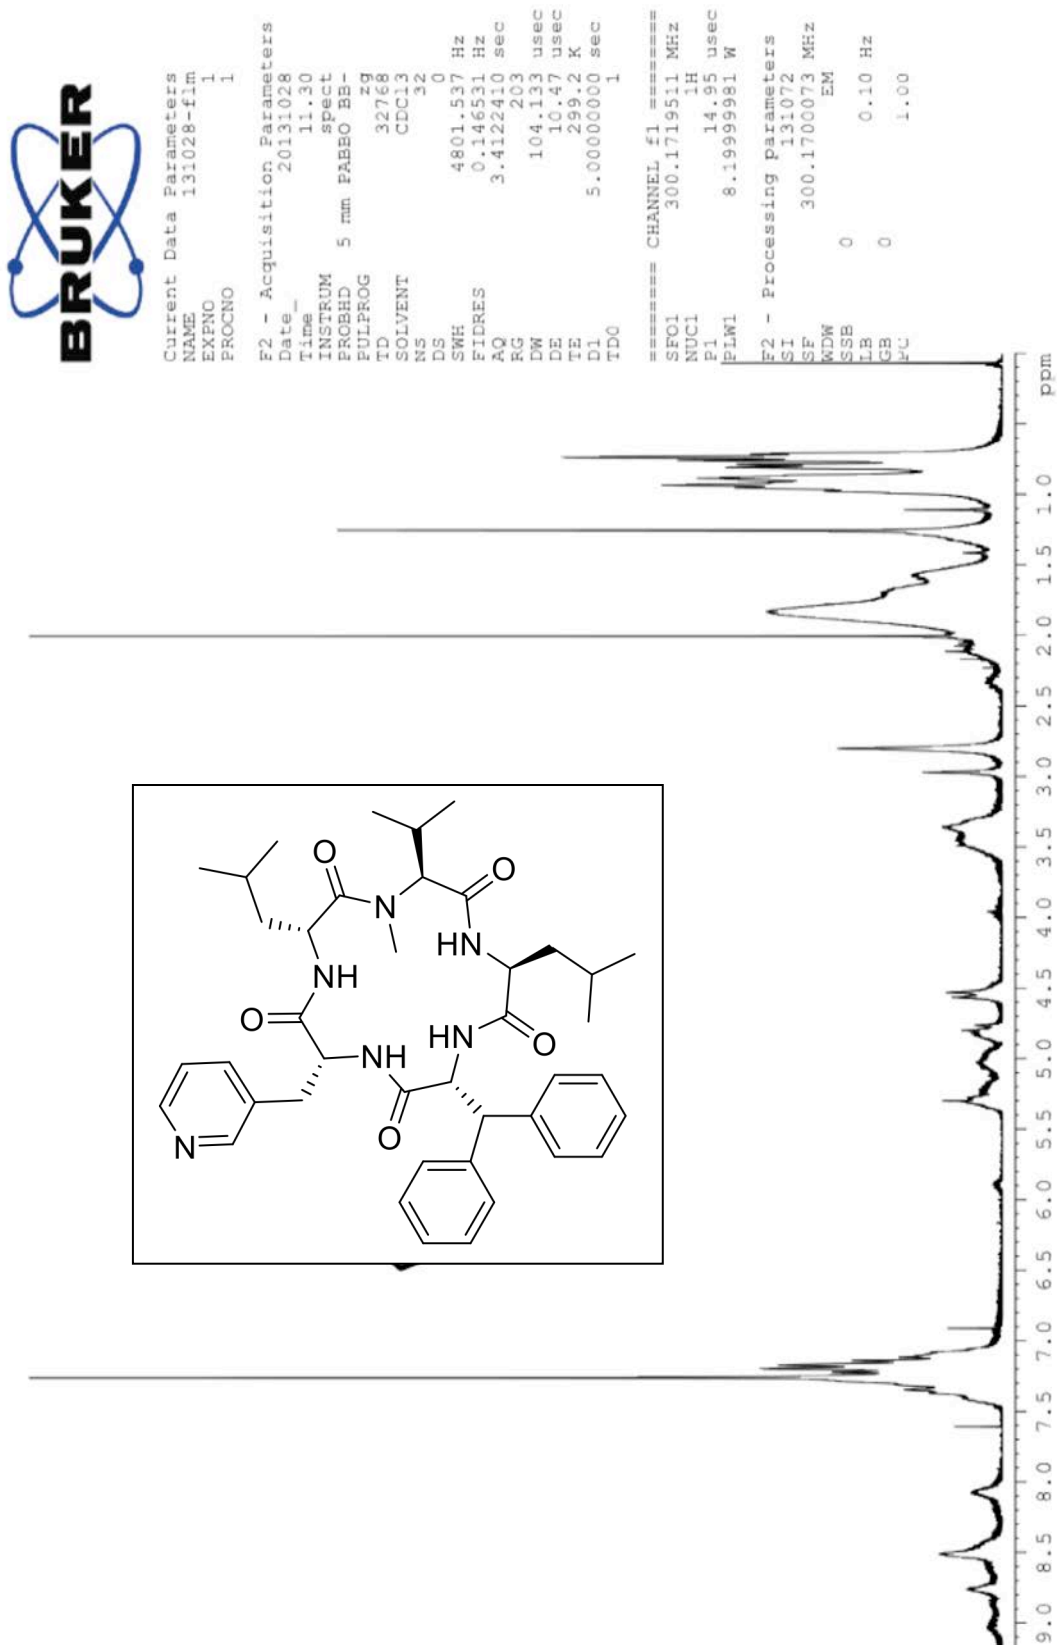



# Supporting Information

## Compound 4: LCMS of DDLP HO-Leu-N-Me-Val-D-Leu-D-3-(4-Pyridyl)Ala-3,3-Diphenyl-D-Ala-NH<sub>2</sub>

17/04/2014 15:42:53 1 / 1

### ==== Shimadzu LCMSsolution Analysis Report ====

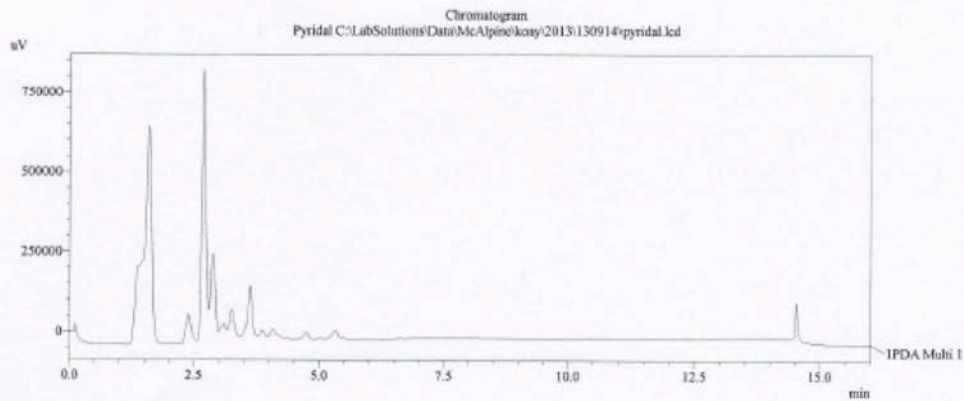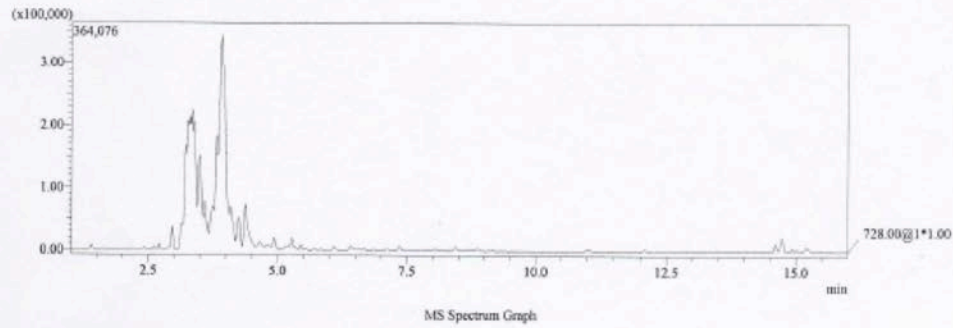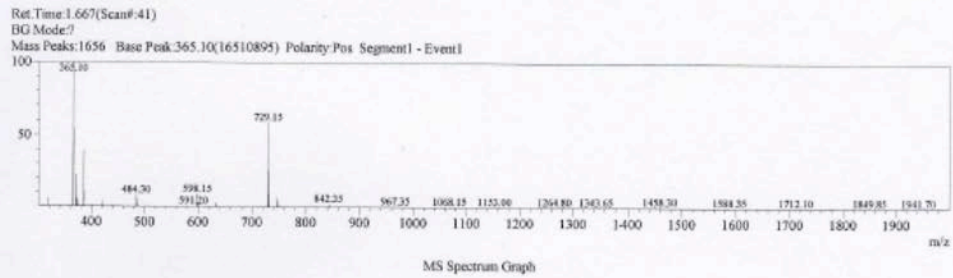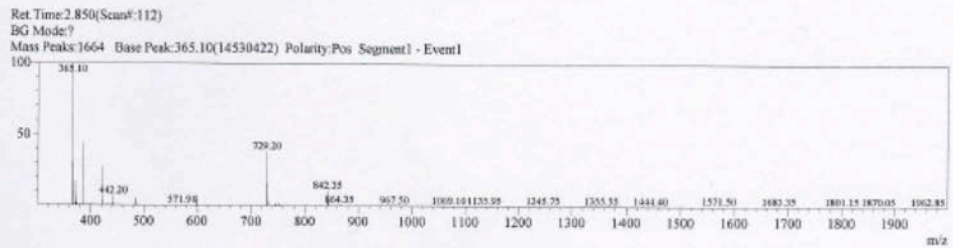

C:\LabSolutions\Data\McAlpine\koay\2013\130914\pyridal.lcd

Supporting Information

Compound 4: LCMS of *cyclo*-Leu-*N*-Me-Val-D-Leu-D-3-(4-Pyridyl)Ala-3,3-Diphenyl-D-Ala

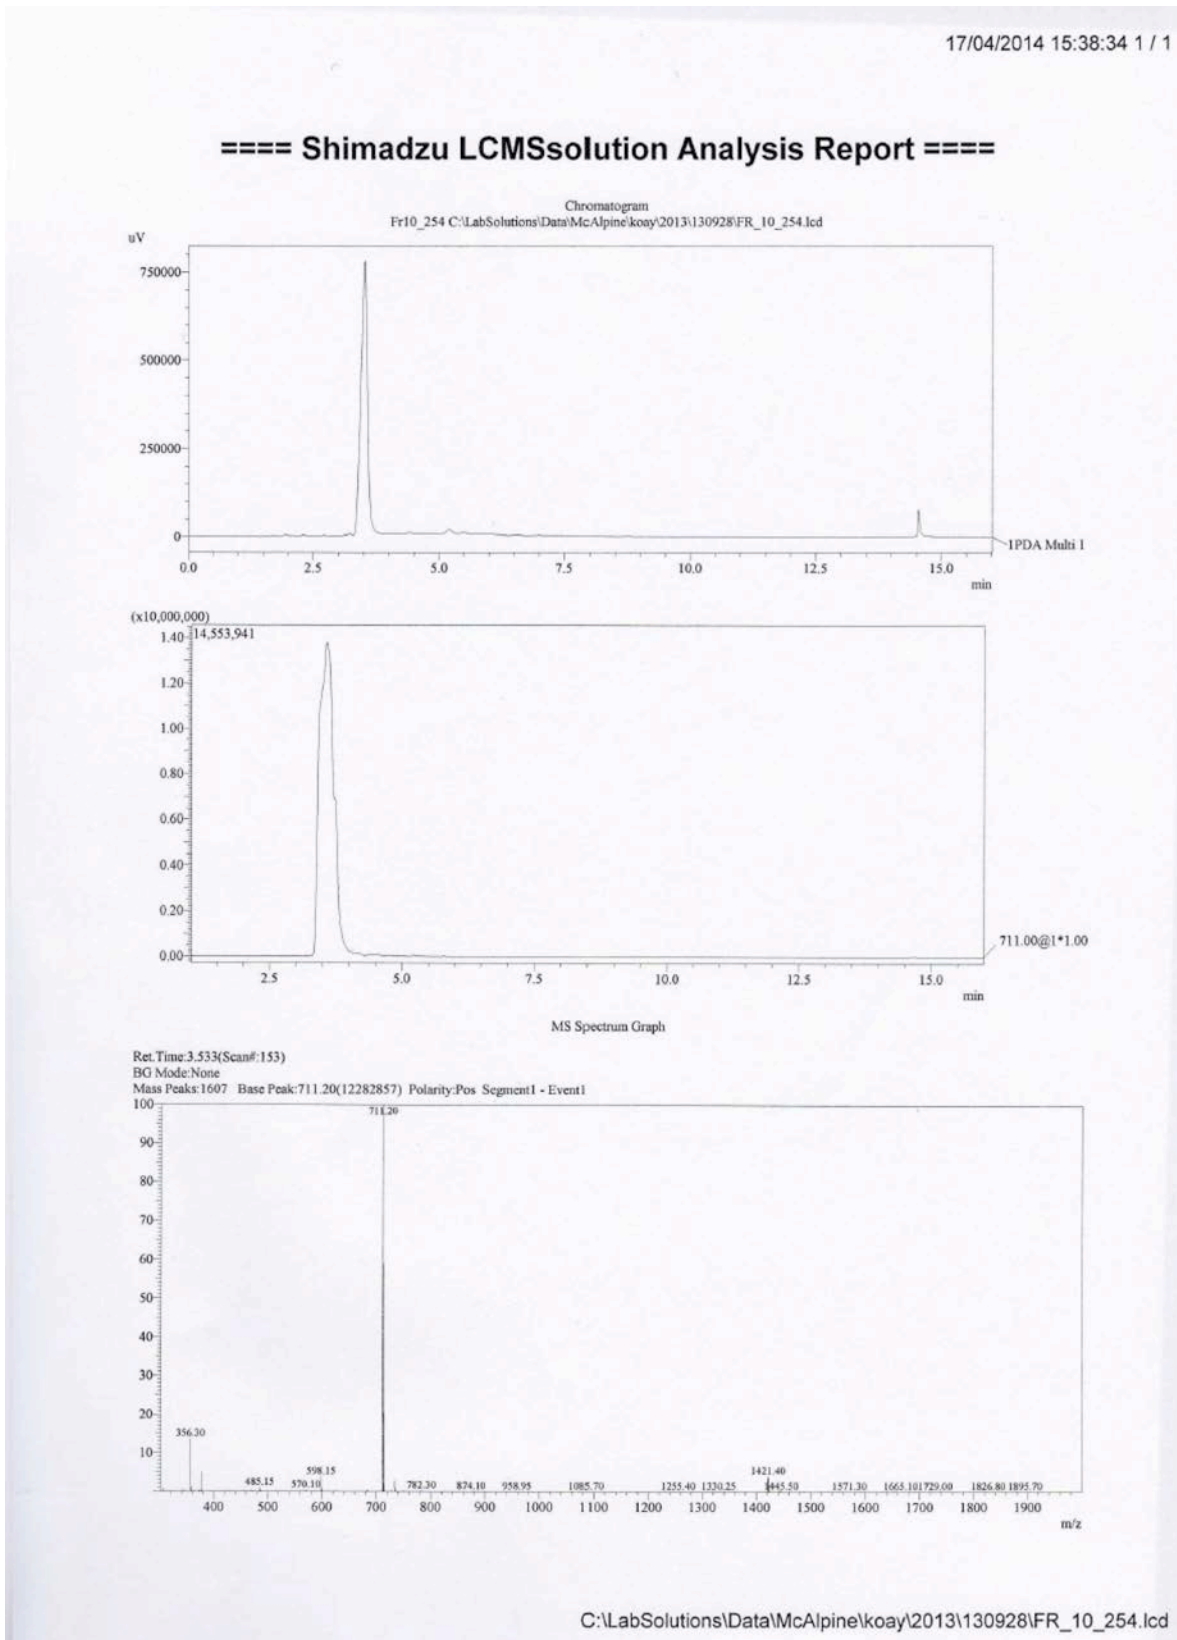

Supporting Information

Compound 4: <sup>1</sup>HNMR of *cyclo*-Leu-*N*-Me-Val-D-Leu-D-3-(4-Pyridyl)Ala-3,3-Diphenyl-D-Ala

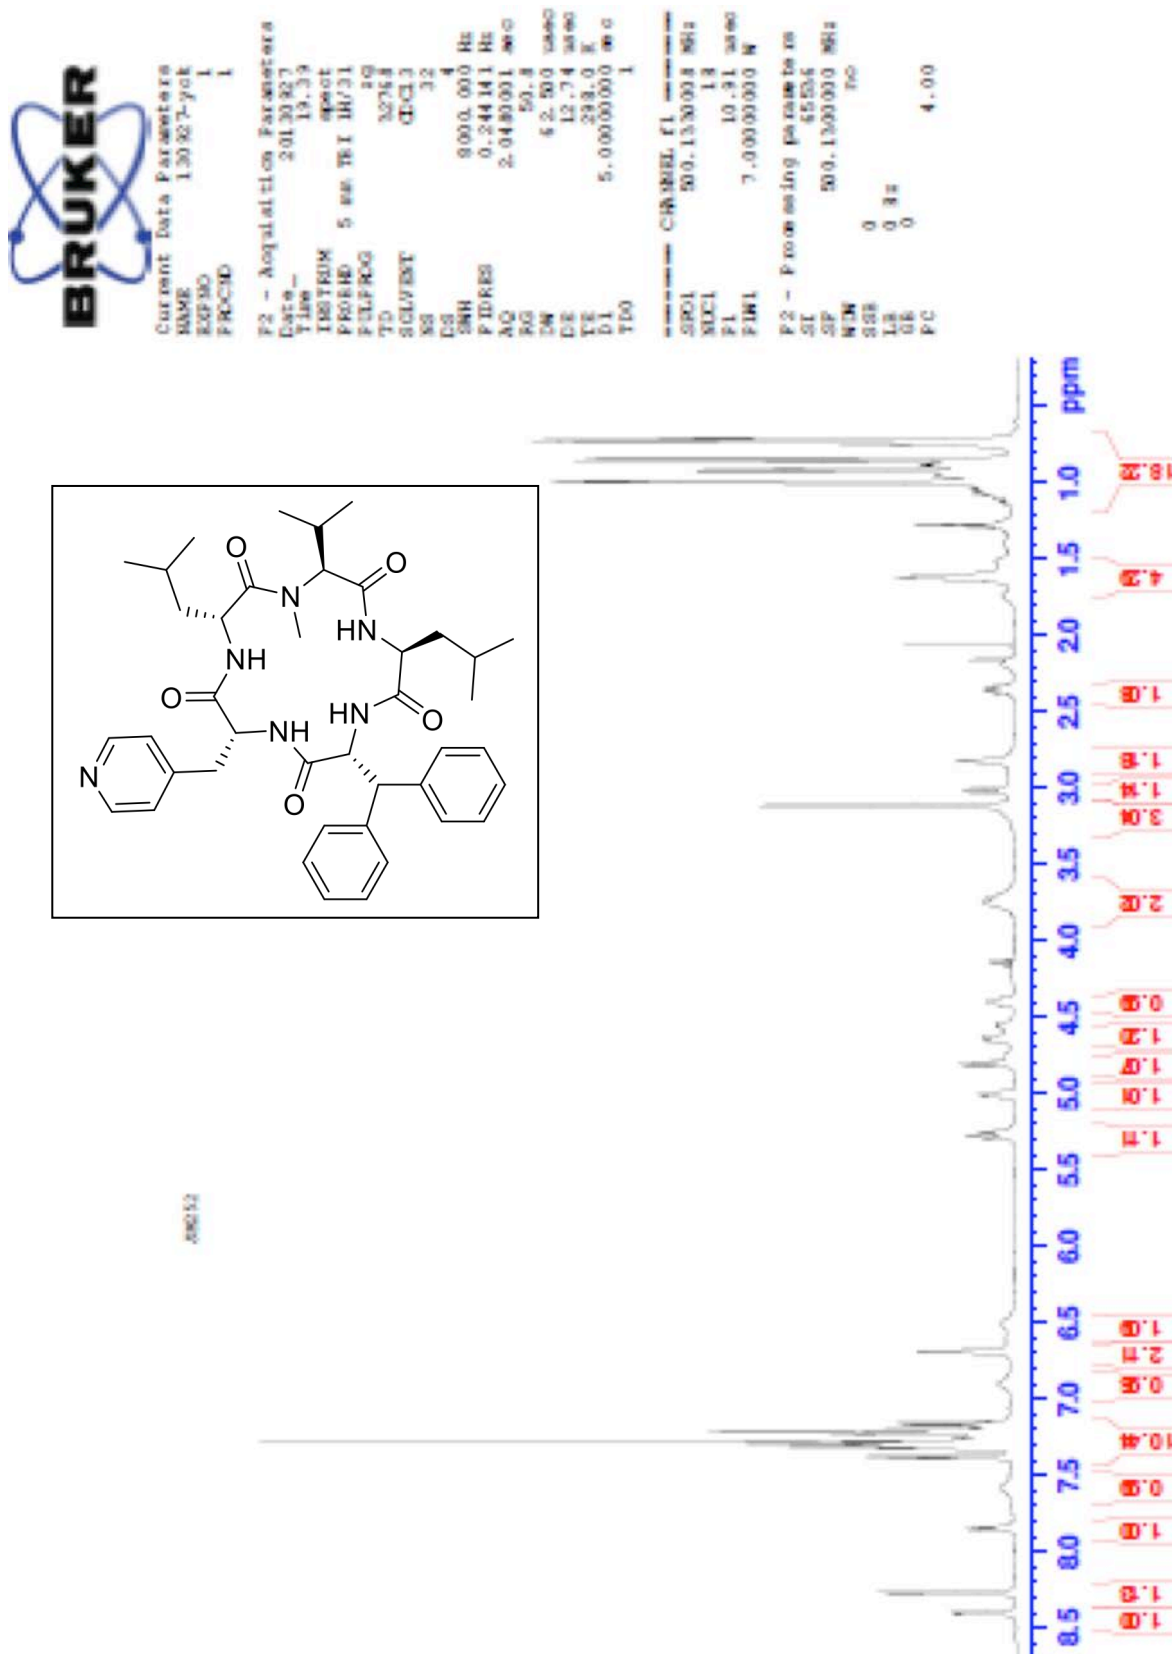

*Supporting Information*

**Compound 5: LCMS of DDLP HO-Leu-N-Me-Val-D-Leu-D-Trp(Boc)-3,3-Diphenyl-D-Ala**

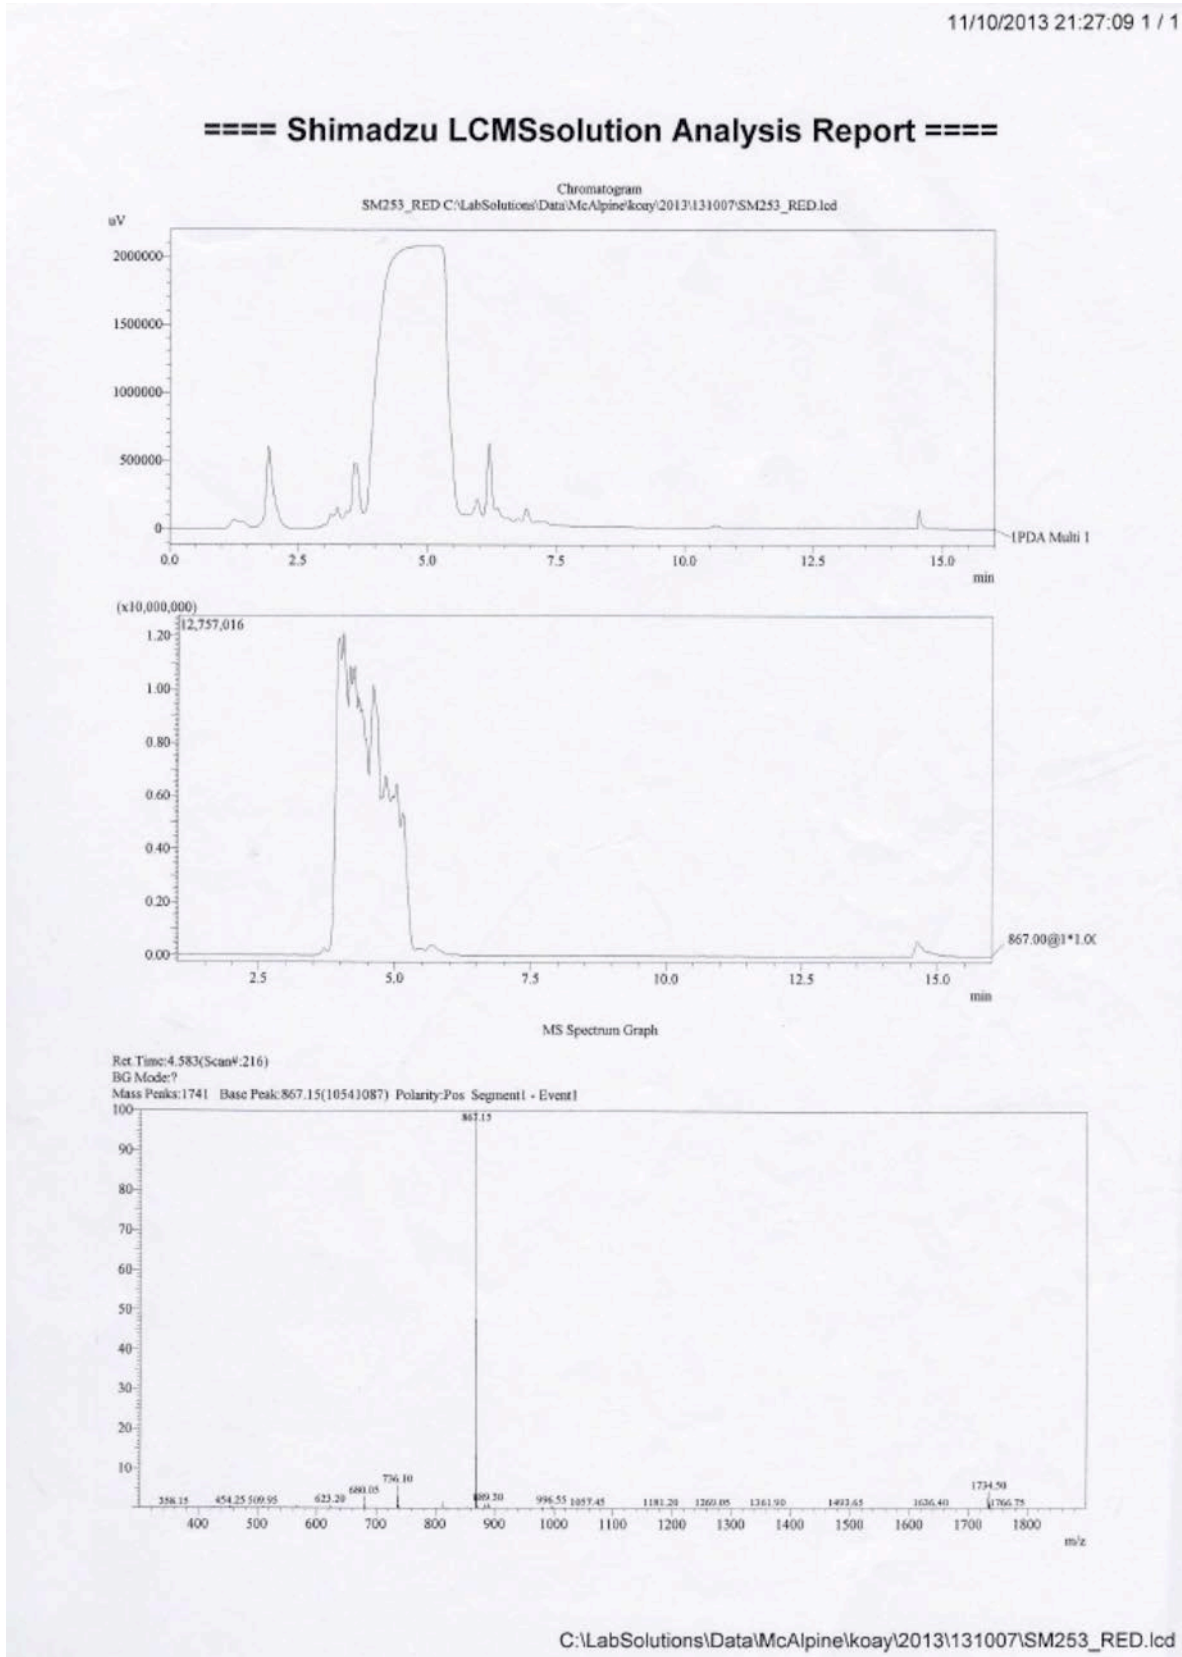

Supporting Information

Compound 5: LCMS of *cyclo*-Leu-*N*-Me-Val-D-Leu-D-Trp(Boc)-3,3-Diphenyl-D-Ala

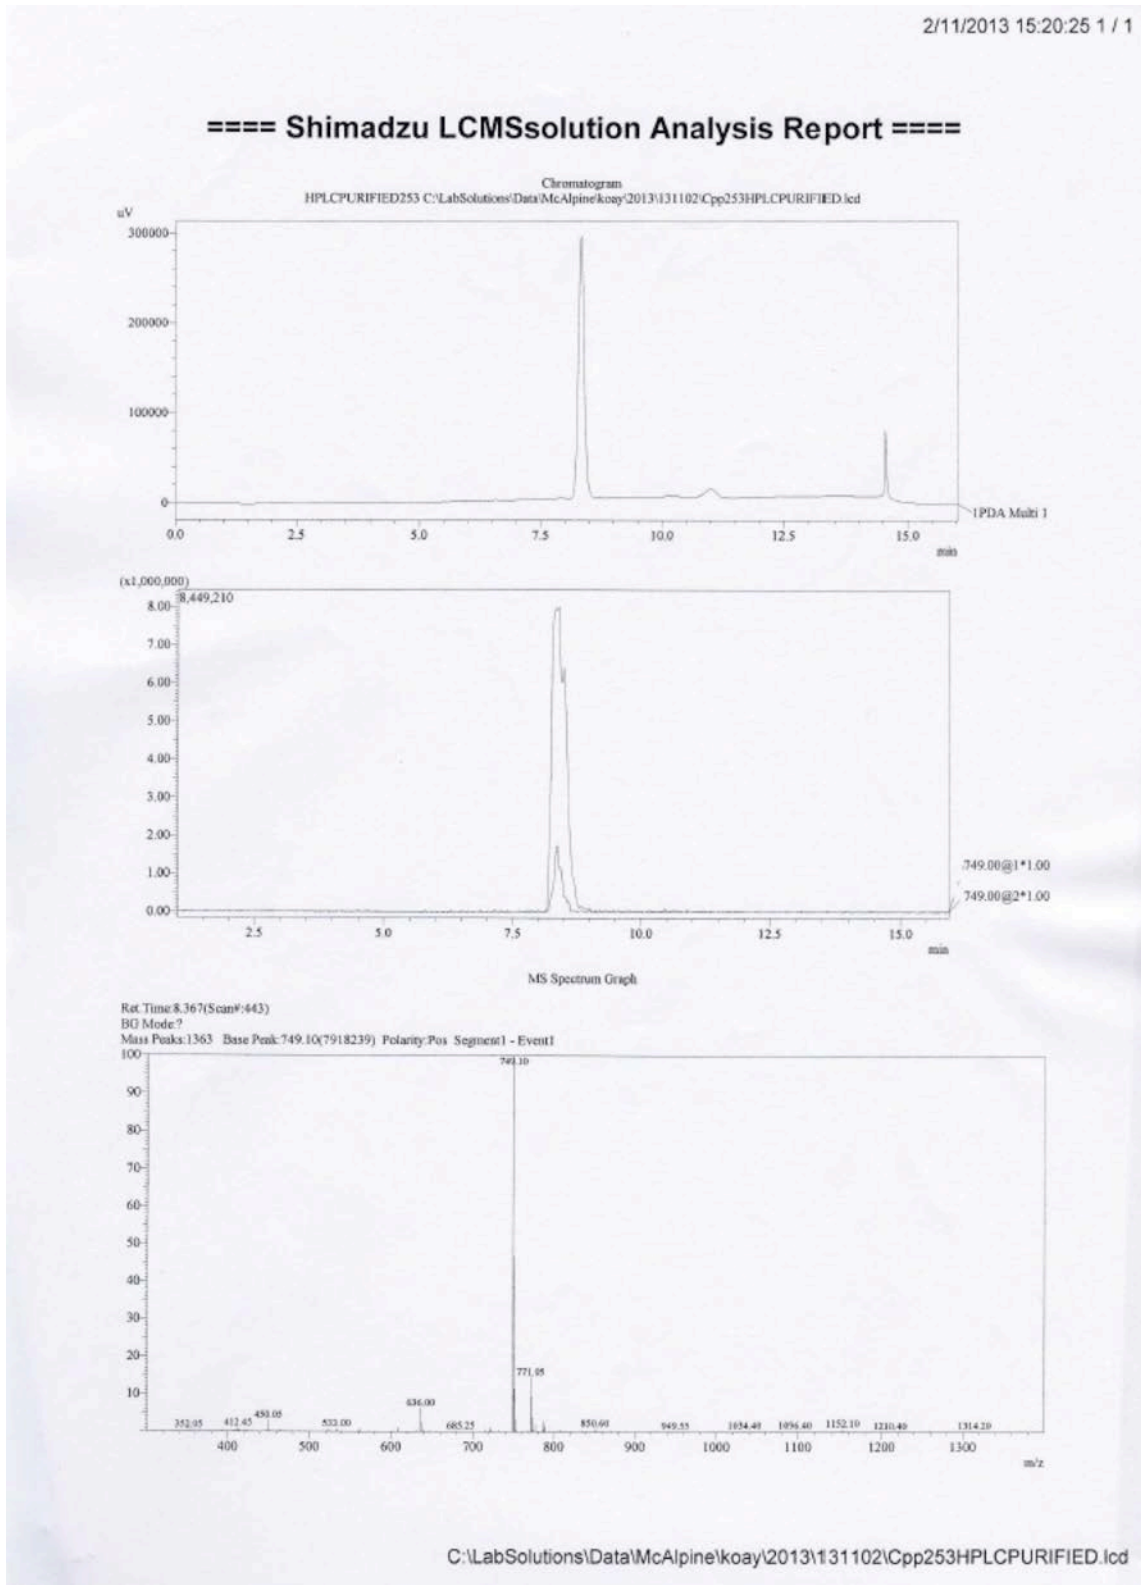

## Supporting Information

### Compound 5: <sup>1</sup>HNMR of *cyclo*-Leu-*N*-Me-Val-*D*-Leu-*D*-Trp(Boc)-3,3-Diphenyl-*D*-Ala

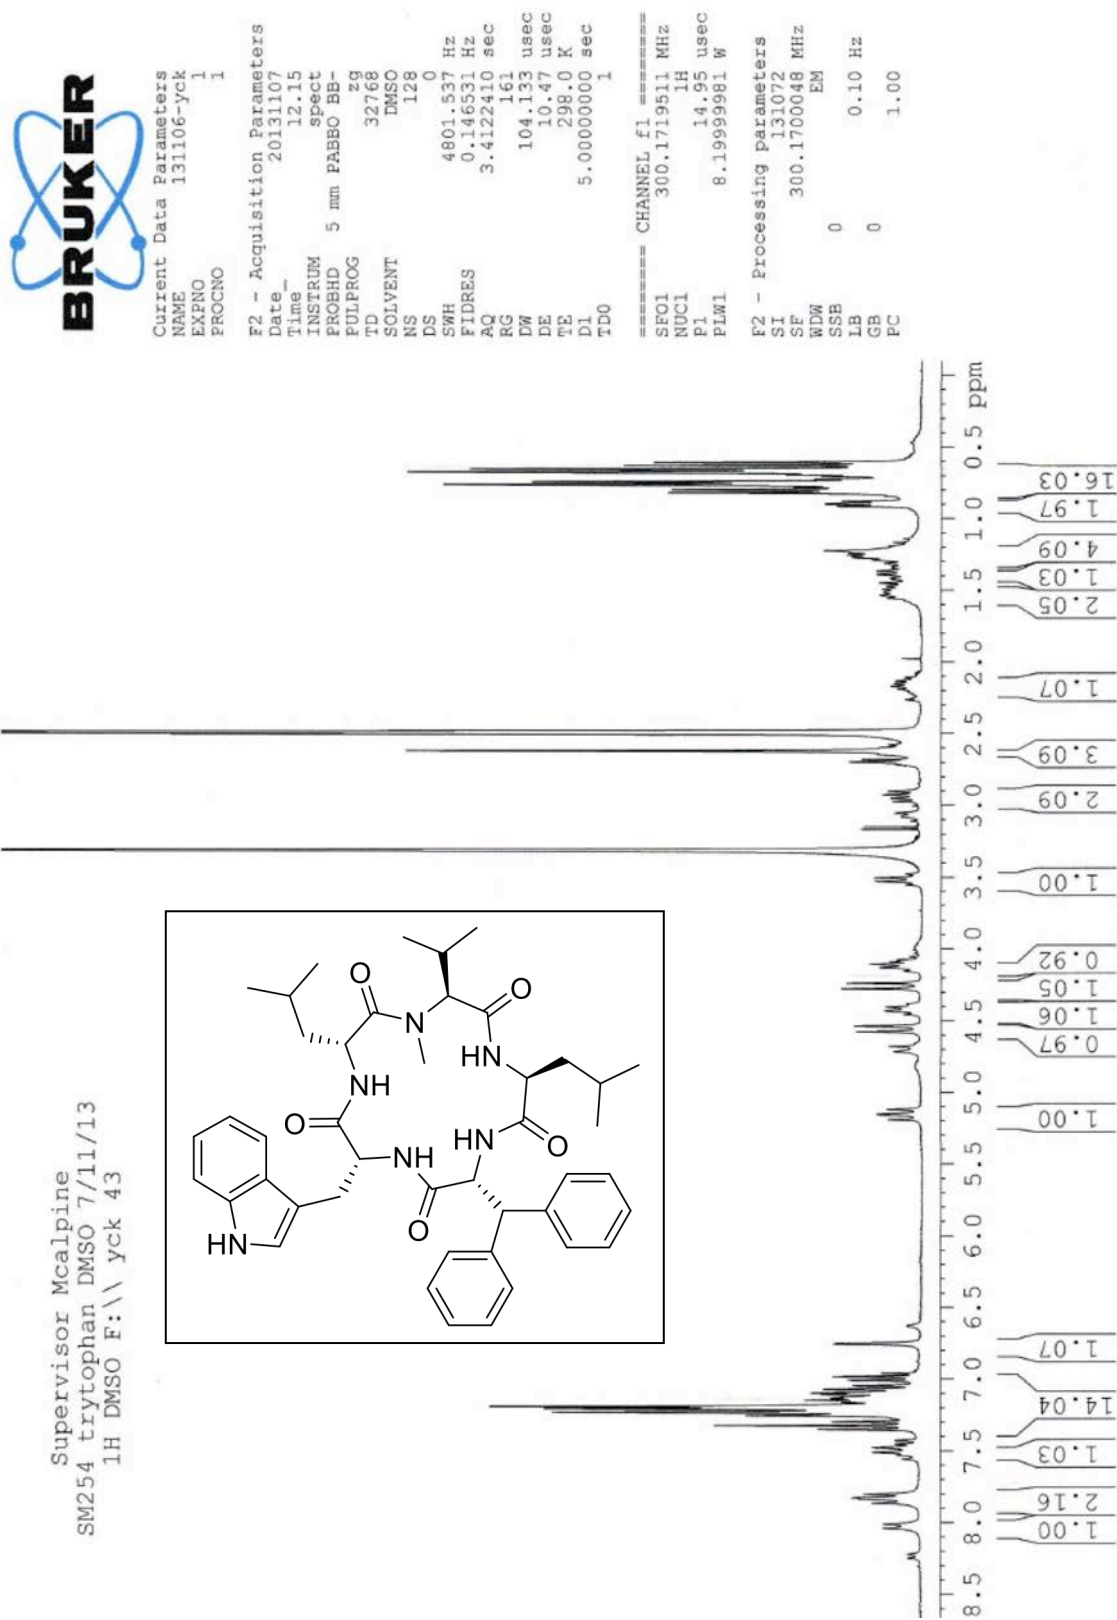



Supporting Information

Compound 6: LCMS of DDLP HO-Leu-N-Me-Val-D-Leu-D-Tyr(Me)-3,3-Diphenyl-D-Ala-NH<sub>2</sub>

4/12/2013 09:26:38 1 / 1

==== Shimadzu LCMSsolution Analysis Report ====

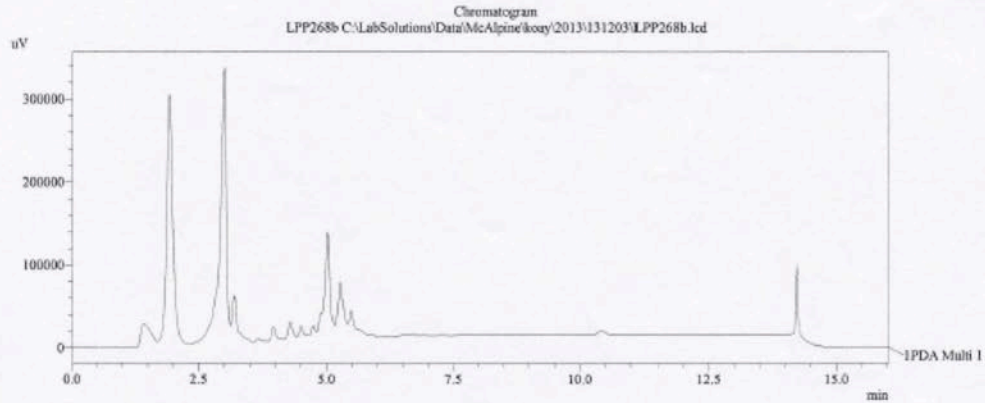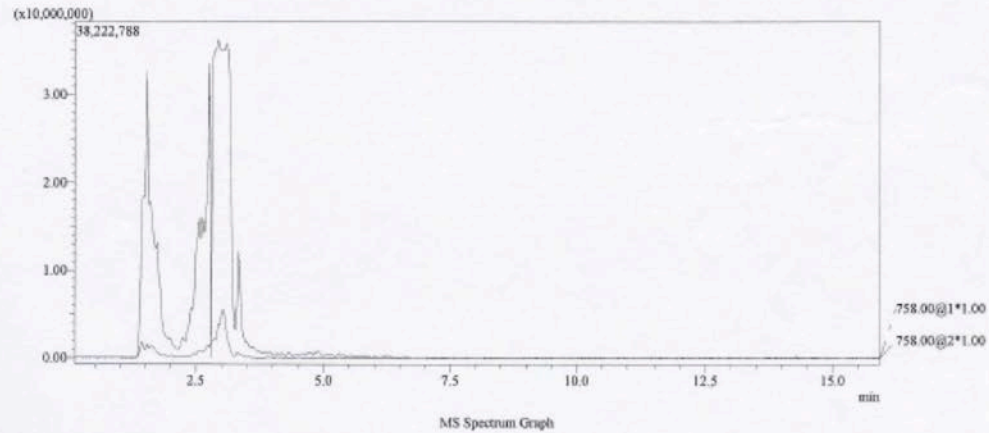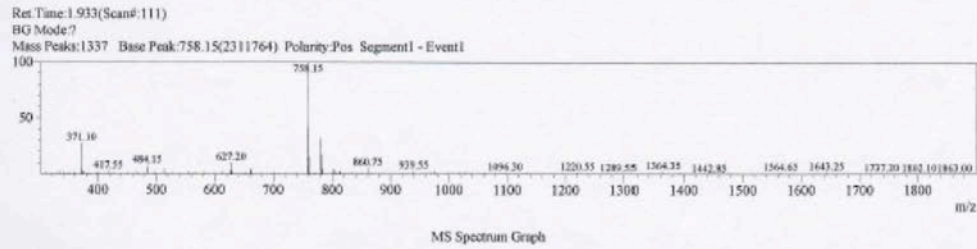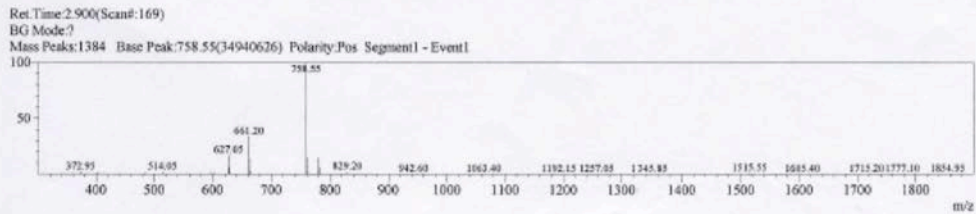

C:\LabSolutions\Data\McAlpine\koay\2013\131203\LPP268b.lcd

Supporting Information

Compound 6: LCMS of *cyclo*-Leu-*N*-Me-Val-D-Leu-D-Tyr(Me)-3,3-Diphenyl-D-Ala

14/01/2014 16:40:36 1 / 1

==== Shimadzu LCMSsolution Analysis Report ====

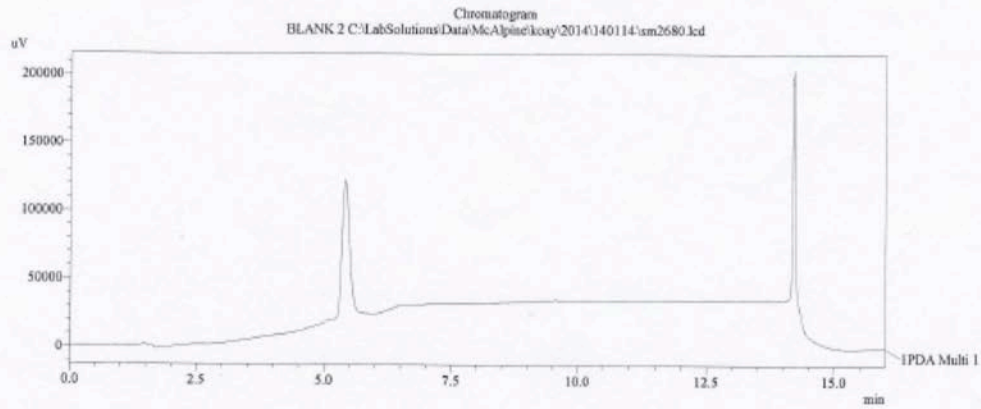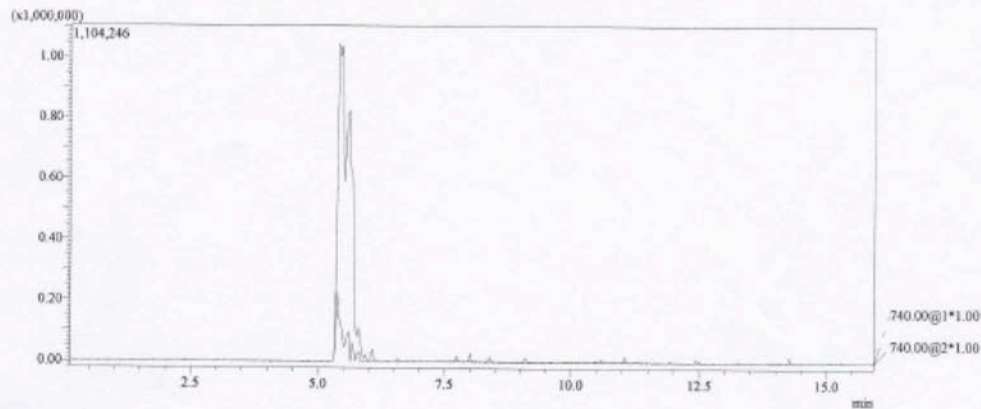

MS Spectrum Graph

Ret Time: 5.400(Scan# 319)  
BG Mode?  
Mass Peaks:1386 Base Peak:740.10(1046128) Polarity:Pos Segment:1 - Event:1  
Intensity

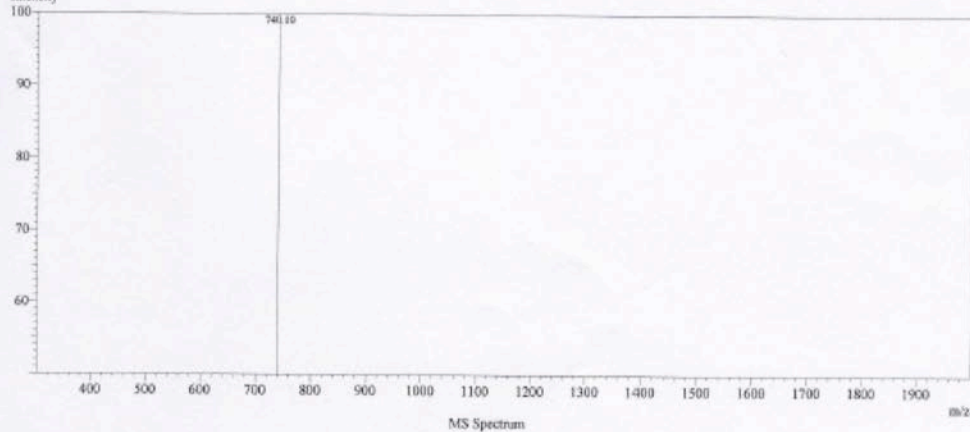

MS Spectrum

C:\LabSolutions\Data\McAlpine\koay\2014\140114\sm2680.lcd



Supporting Information

Compound 6: <sup>1</sup>HNMR of *cyclo*-Leu-*N*-Me-Val-*D*-Leu-*D*-Tyr(Me)-3,3-Diphenyl-*D*-Ala

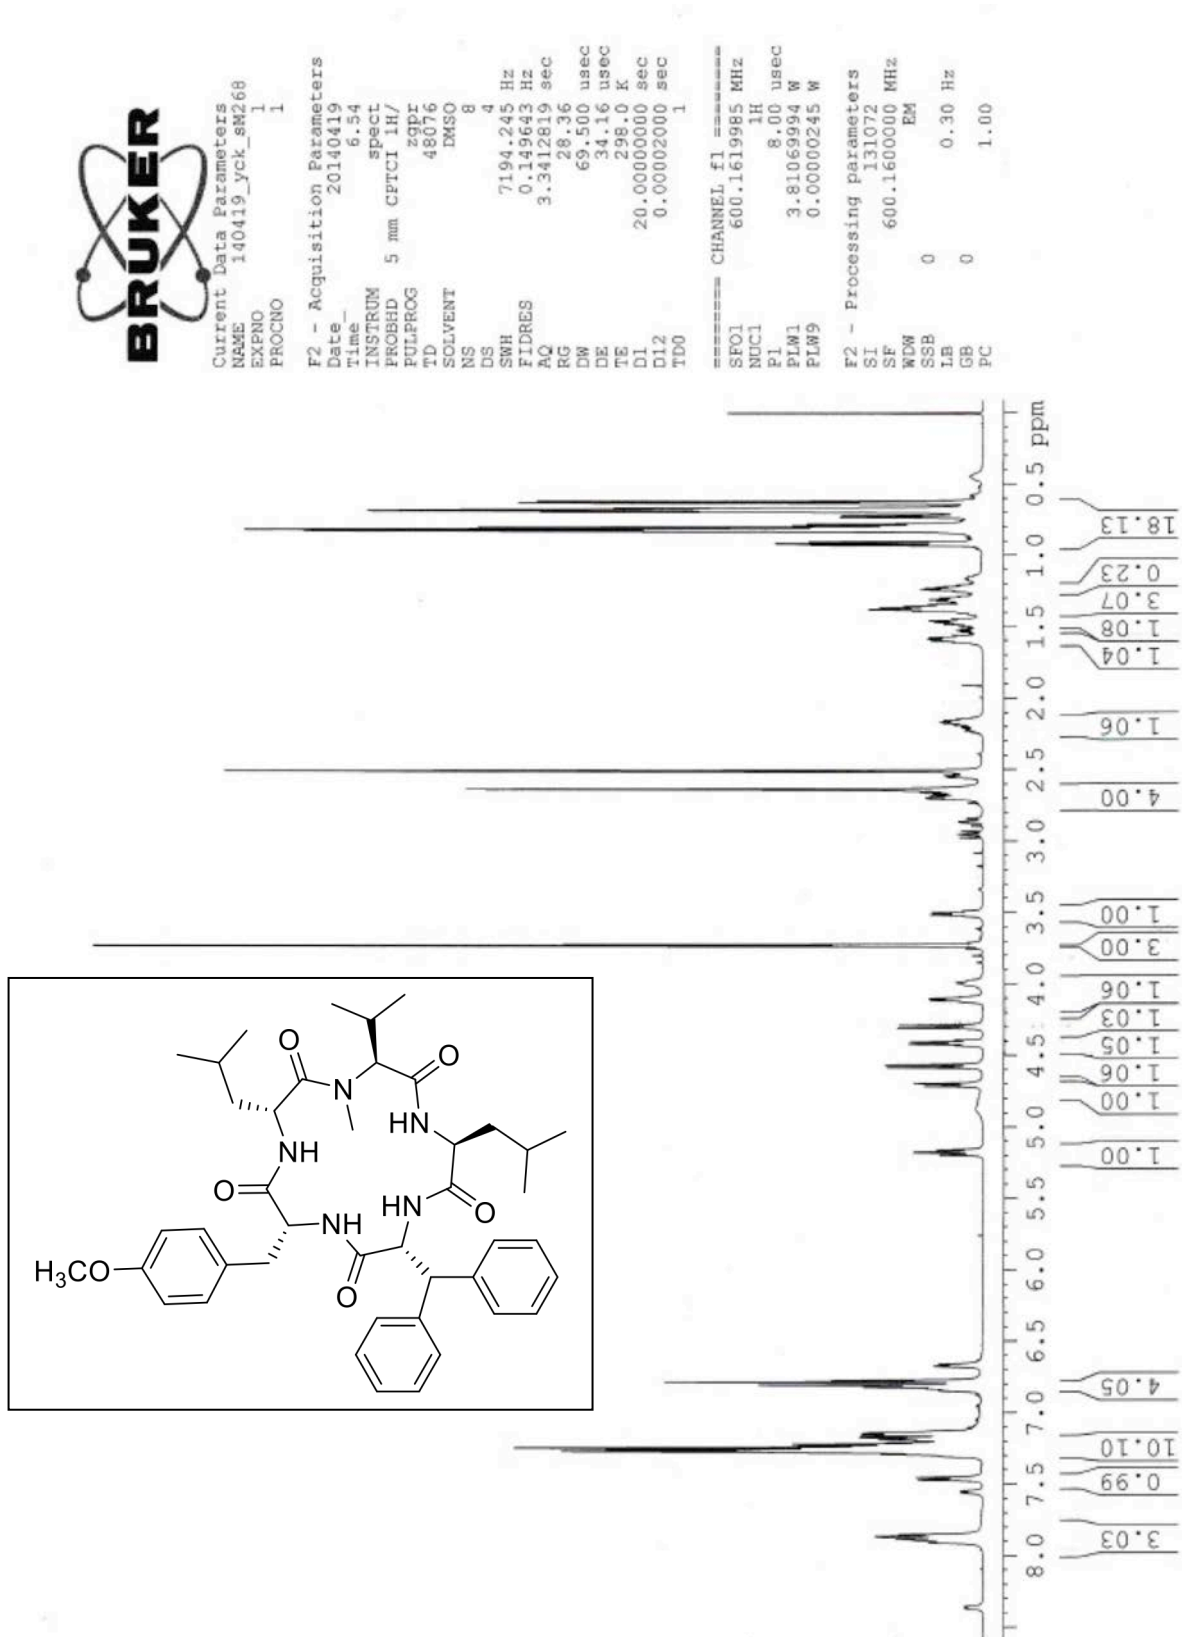

## Supporting Information

### Compound 7: LCMS of DDLP HO-Leu-N-Me-Val-D-Leu-D-3-(4-Thiazoyl)Ala-3,3-Diphenyl-D-Ala-NH<sub>2</sub>

3/02/2014 20:34:23 1 / 1

#### ==== Shimadzu LCMSsolution Analysis Report ====

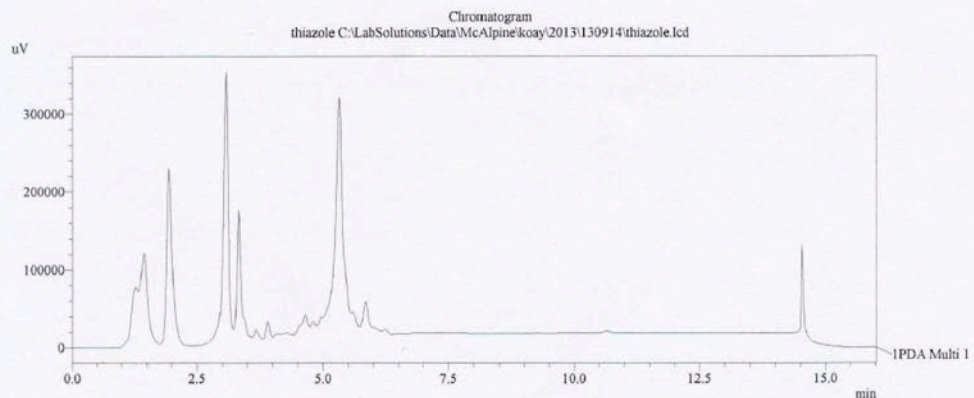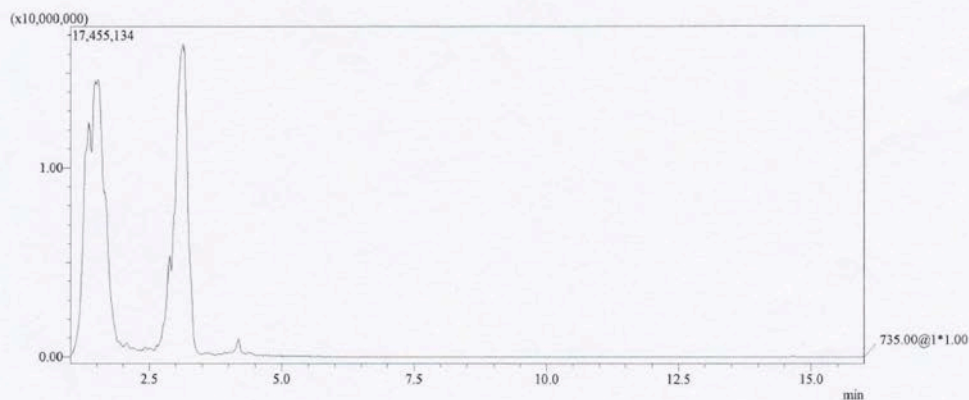

MS Spectrum Graph

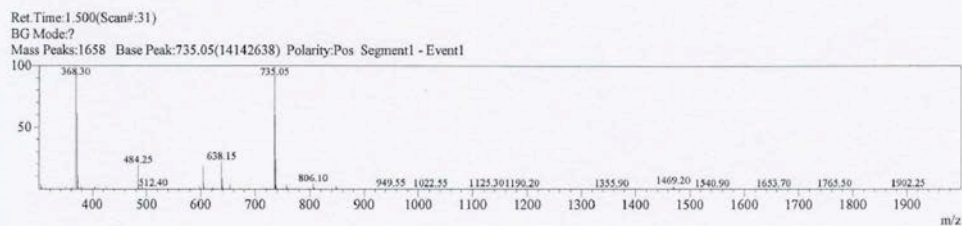

MS Spectrum Graph

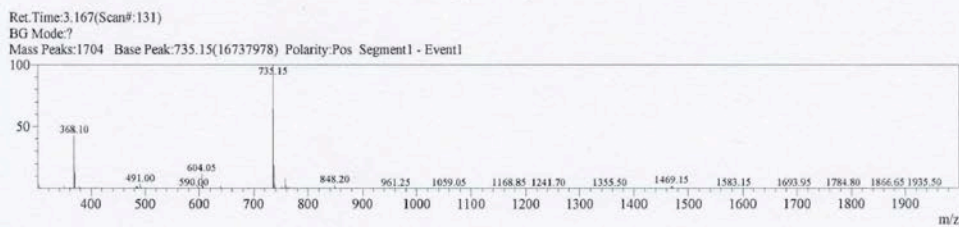

C:\LabSolutions\Data\McAlpine\koay\2013\130914\thiazole.lcd

## Supporting Information

### Compound 7: <sup>1</sup>HNMR of DDLP HO-Leu-N-Me-Val-D-Leu-D-3-(4-Thiazoyl)Ala-3,3-Diphenyl-D-Ala-NH<sub>2</sub>

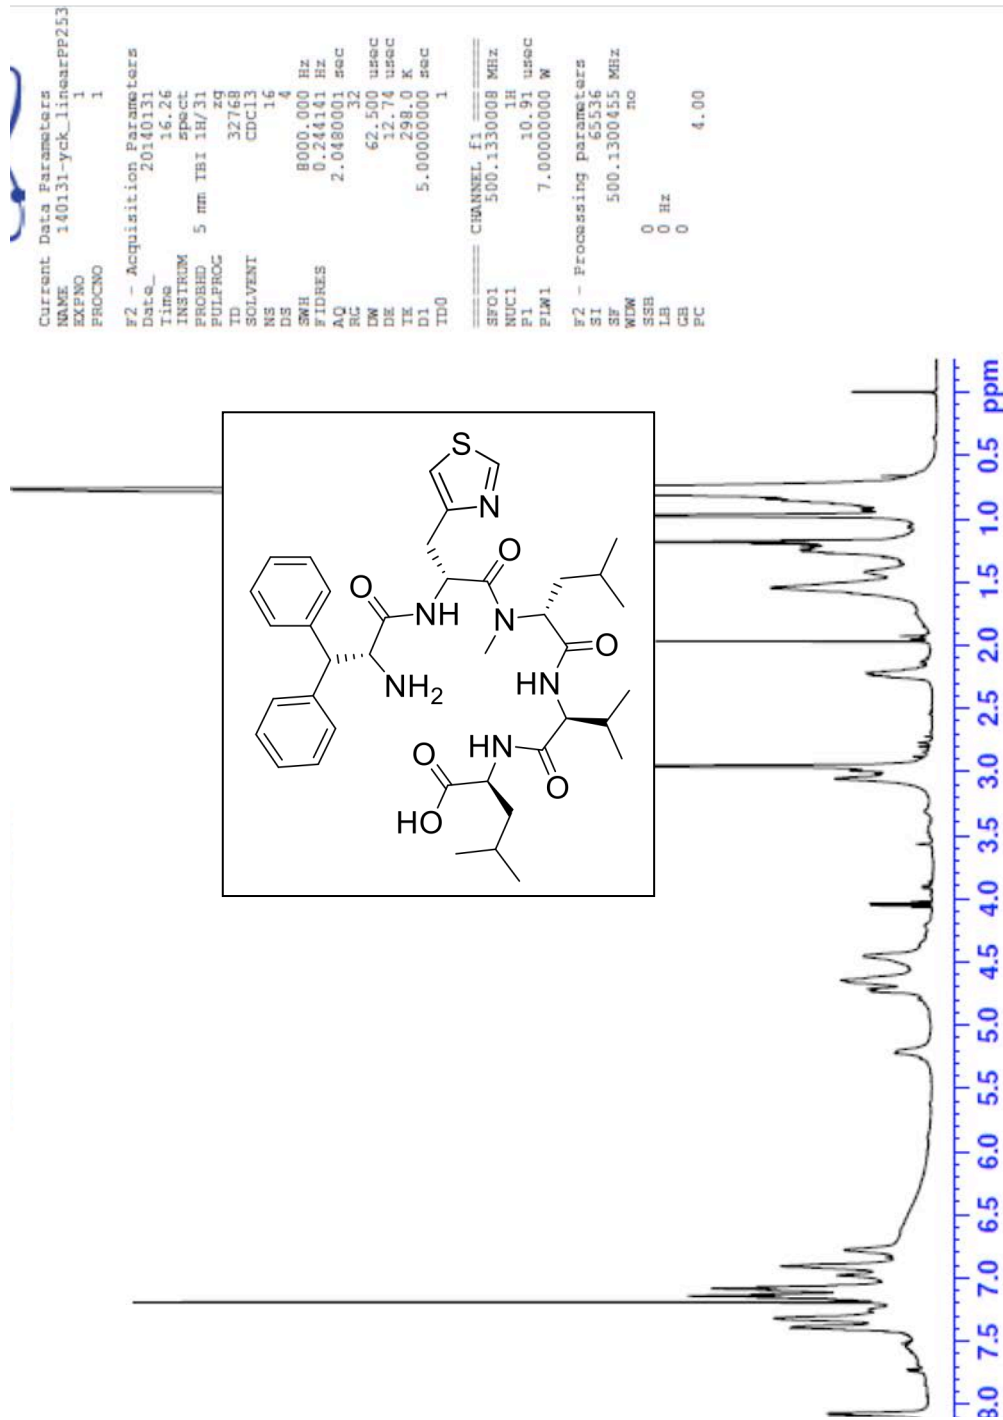

Supporting Information

Compound 7: LCMS of cyclo-Leu-N-Me-Val-D-Leu-D-3-(4-Thiazoyl)Ala-3,3- Diphenyl-D-Ala

9/10/2013 20:53:50 1 / 1

==== Shimadzu LCMSsolution Analysis Report ====

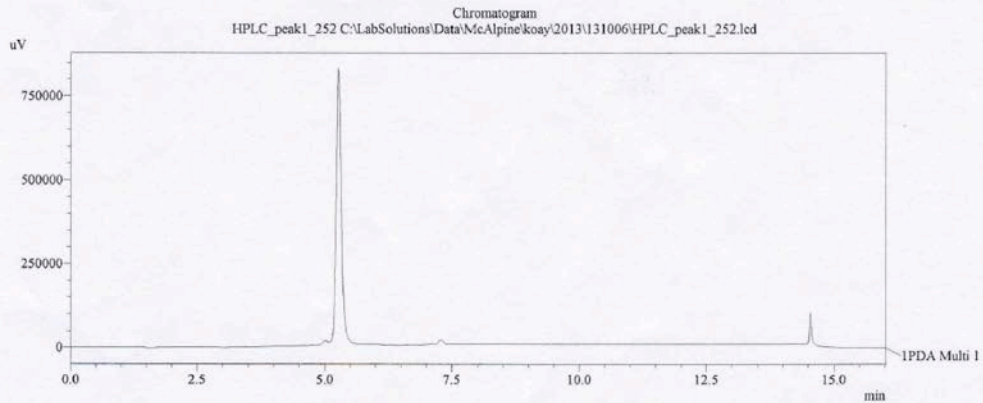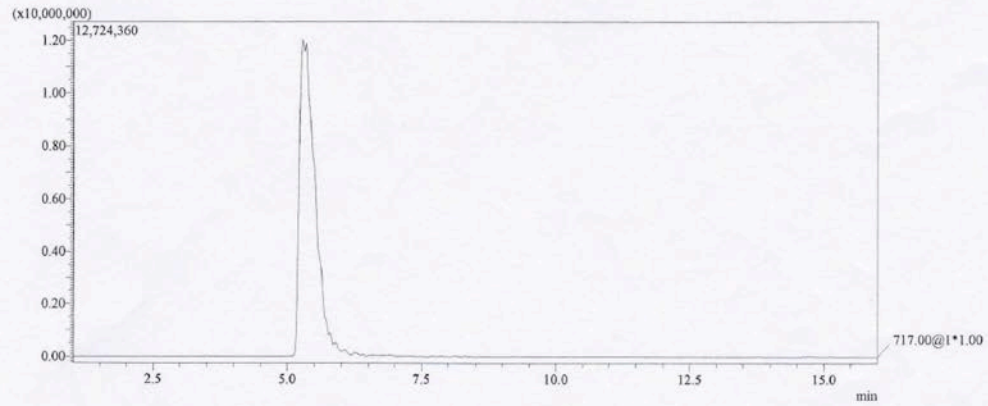

MS Spectrum Graph

Ret Time: 5.250 (Scan#: 256)

BG Mode: None

Mass Peaks: 1566 Base Peak: 717.15 (11289896) Polarity: Pos Segment: 1 - Event: 1

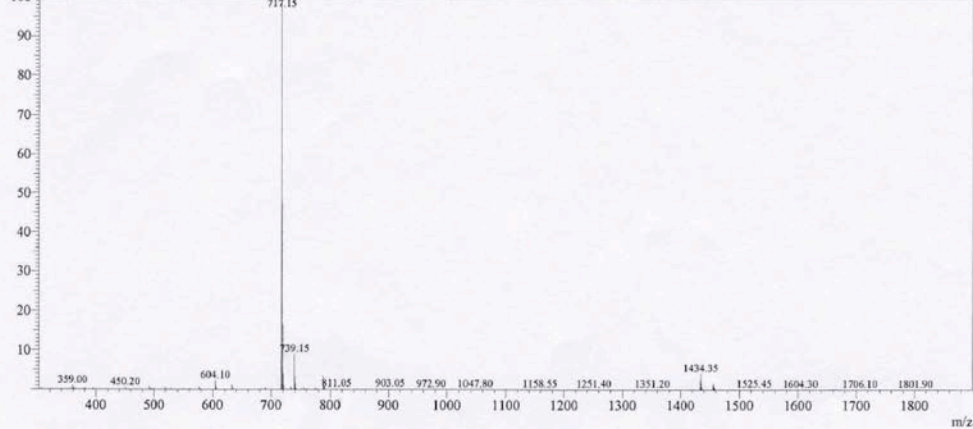

C:\LabSolutions\Data\McAlpine\koay\2013\131006\HPLC\_peak1\_252.lcd

## Supporting Information

### Compound 7: HRMS of cyclo-Leu-N-Me-Val-D-Leu-D-3-(4-Thiazoyl)Ala-3,3- Diphenyl-D-Ala

#### MS Data from Orbitrap

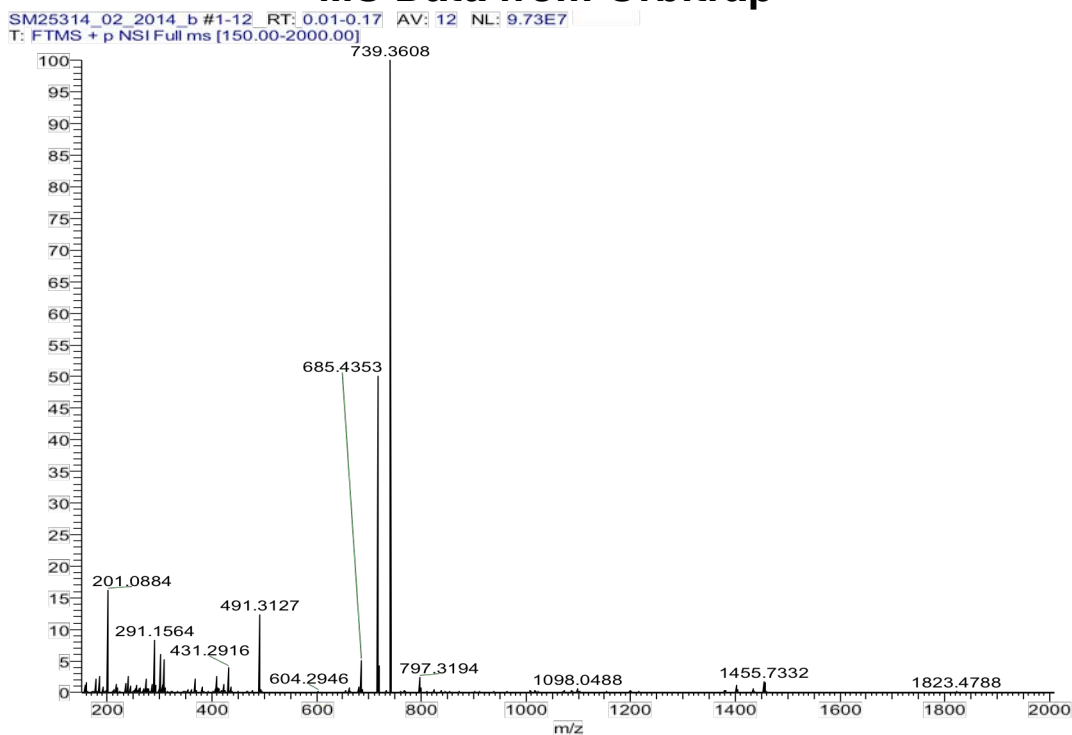

#### Zoomed Spectrum

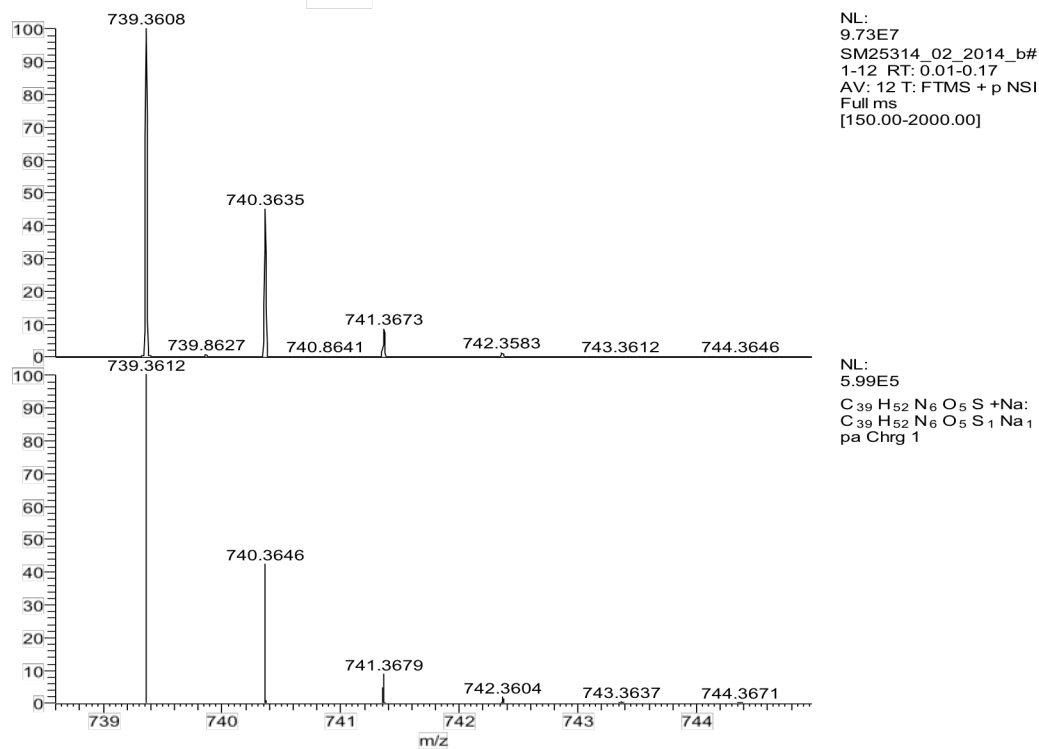

## Supporting Information

### Compound 7: <sup>1</sup>HNMR of cyclo-Leu-N-Me-Val-D-Leu-D-3-(4-Thiazoyl)Ala-3,3-Diphenyl-D-Ala

Current Data Parameters  
NAME 131010\_yck  
EXPNO 2  
PROCNO 1

F2 - Acquisition Parameters  
Date\_ 20131010  
Time 14.35  
INSTRUM spect  
PROBHD 5 mm TBI 1H/31  
PULPROG zg  
ID 32768  
SOLVENT DMSO  
NS 16  
DS 4  
SWH 8000.000 Hz  
FIDRES 0.244141 Hz  
AQ 2.0480001 sec  
RG 64  
DW 62.500 usec  
DE 12.74 usec  
TE 296.2 K  
D1 5.00000000 sec  
ID0 1

CHANNEL f1  
SFO1 500.1330008 MHz  
NUC1 1H  
P1 10.91 usec  
PLW1 7.00000000 W

F2 - Processing parameters  
SI 65536  
SF 500.1300000 MHz  
WDW no  
SSB 0  
LB 0 Hz  
GB 0  
PC 4.00

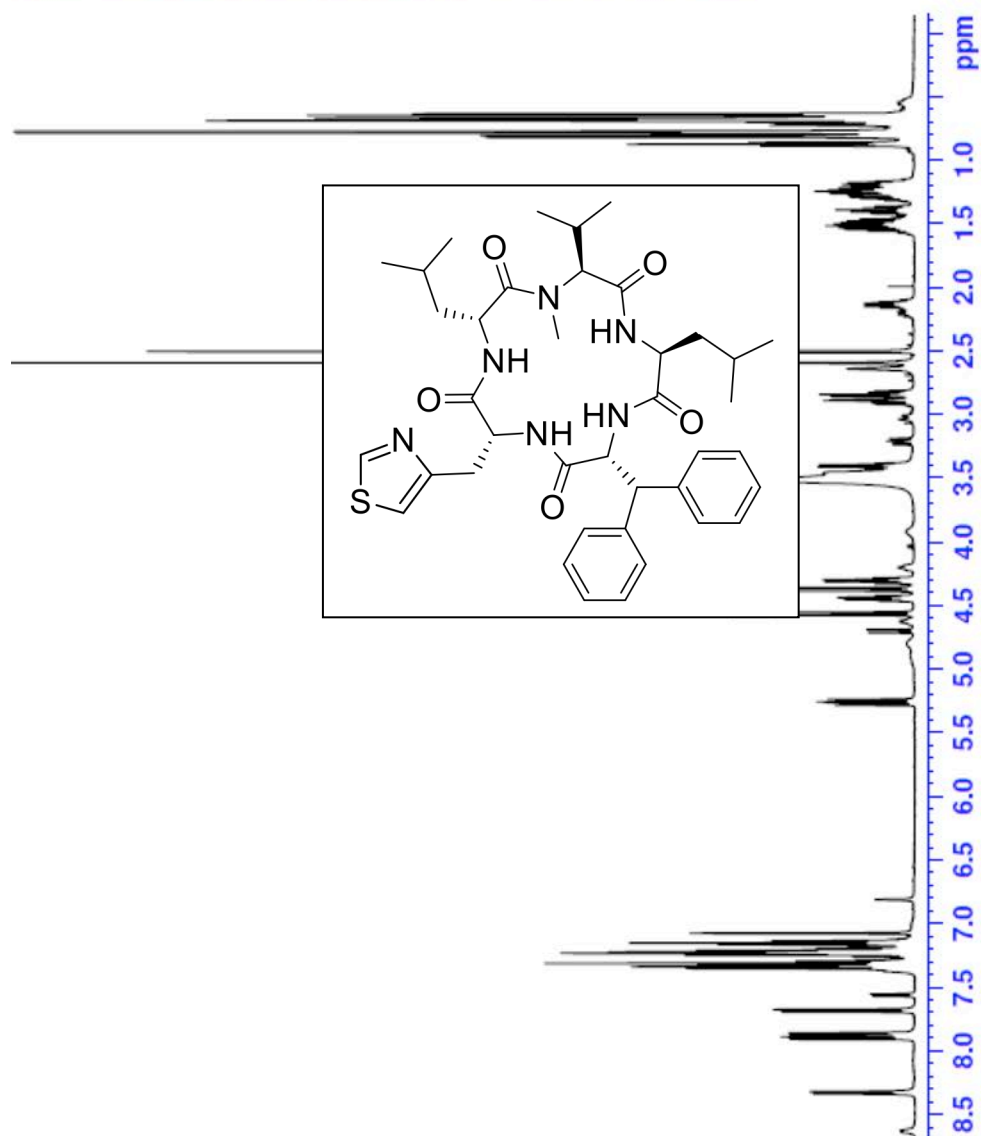

## Supporting Information

### Compound 7: <sup>13</sup>CNMR of cyclo-Leu-N-Me-Val-D-Leu-D-3-(4-Thiazoyl)Ala-3,3-Diphenyl-D-Ala

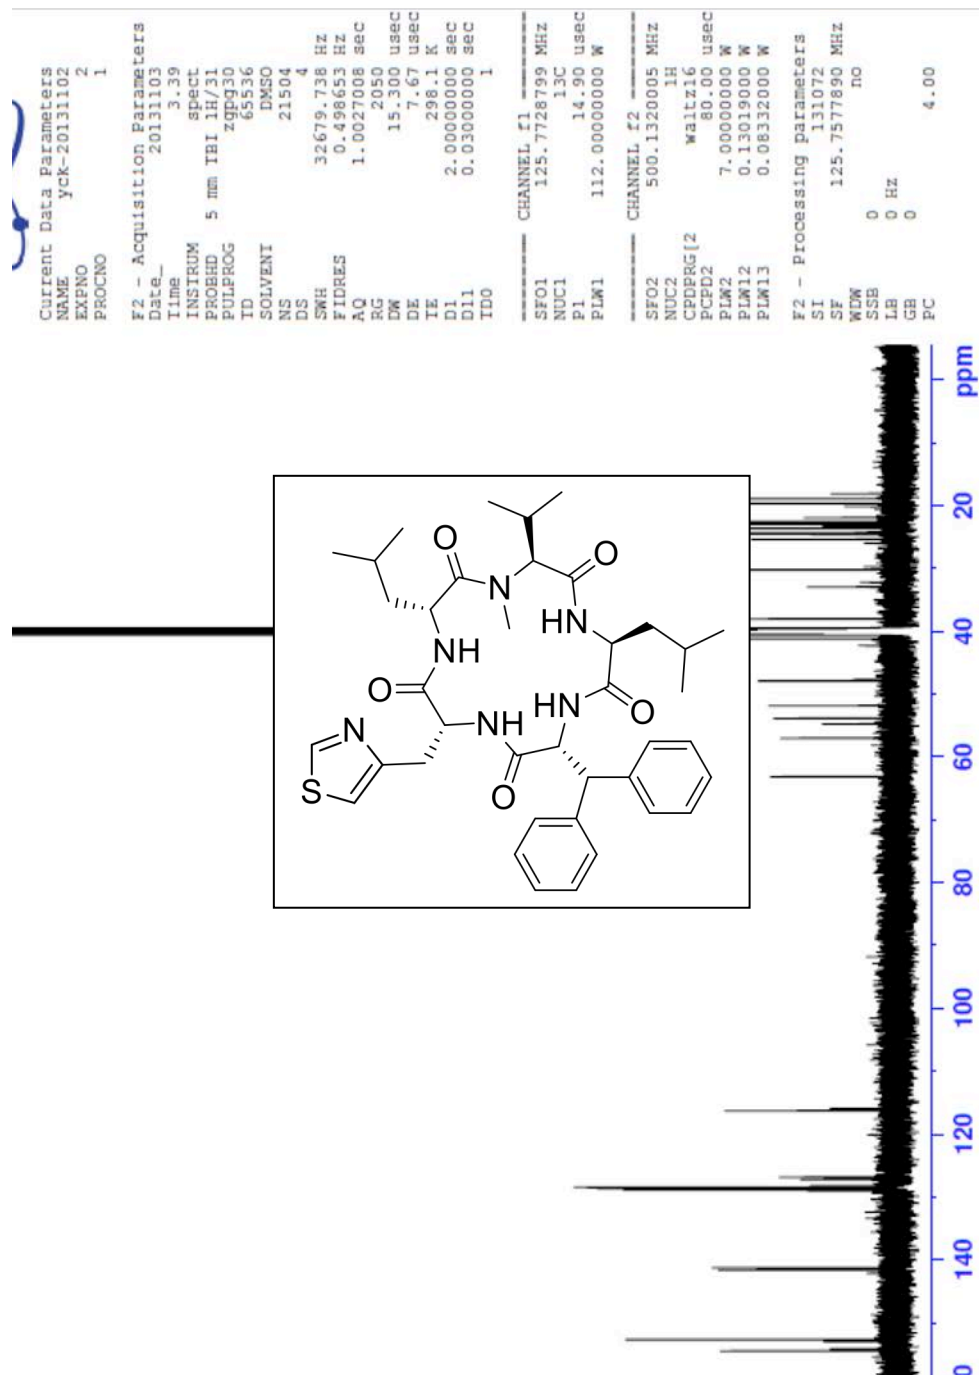



Supporting Information

Compound 7:  $^1\text{H}$ - $^{13}\text{C}$  HSQC of cyclo-Leu-N-Me-Val-D-Leu-D-3-(4-Thiazoyl)Ala-3,3-Diphenyl-D-Ala

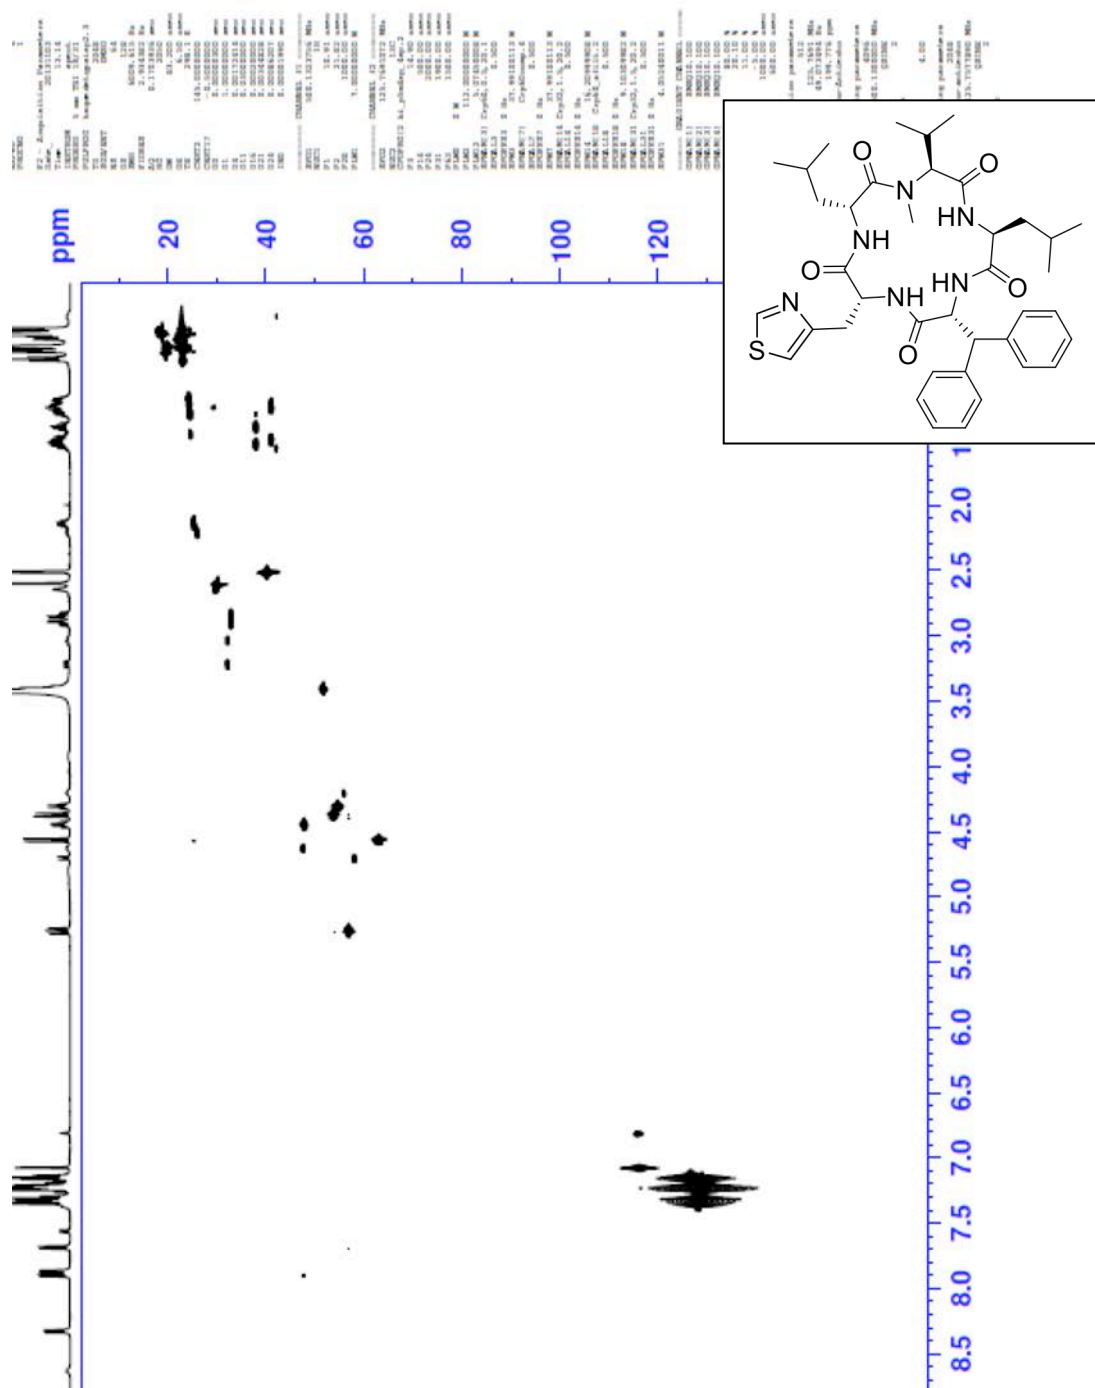



## Supporting Information

### Compound 7: $^1\text{H}$ - $^{13}\text{C}$ HMBC of cyclo-Leu-N-Me-Val-D-Leu-D-3-(4-Thiazoyl)Ala-3,3-Diphenyl-D-Ala

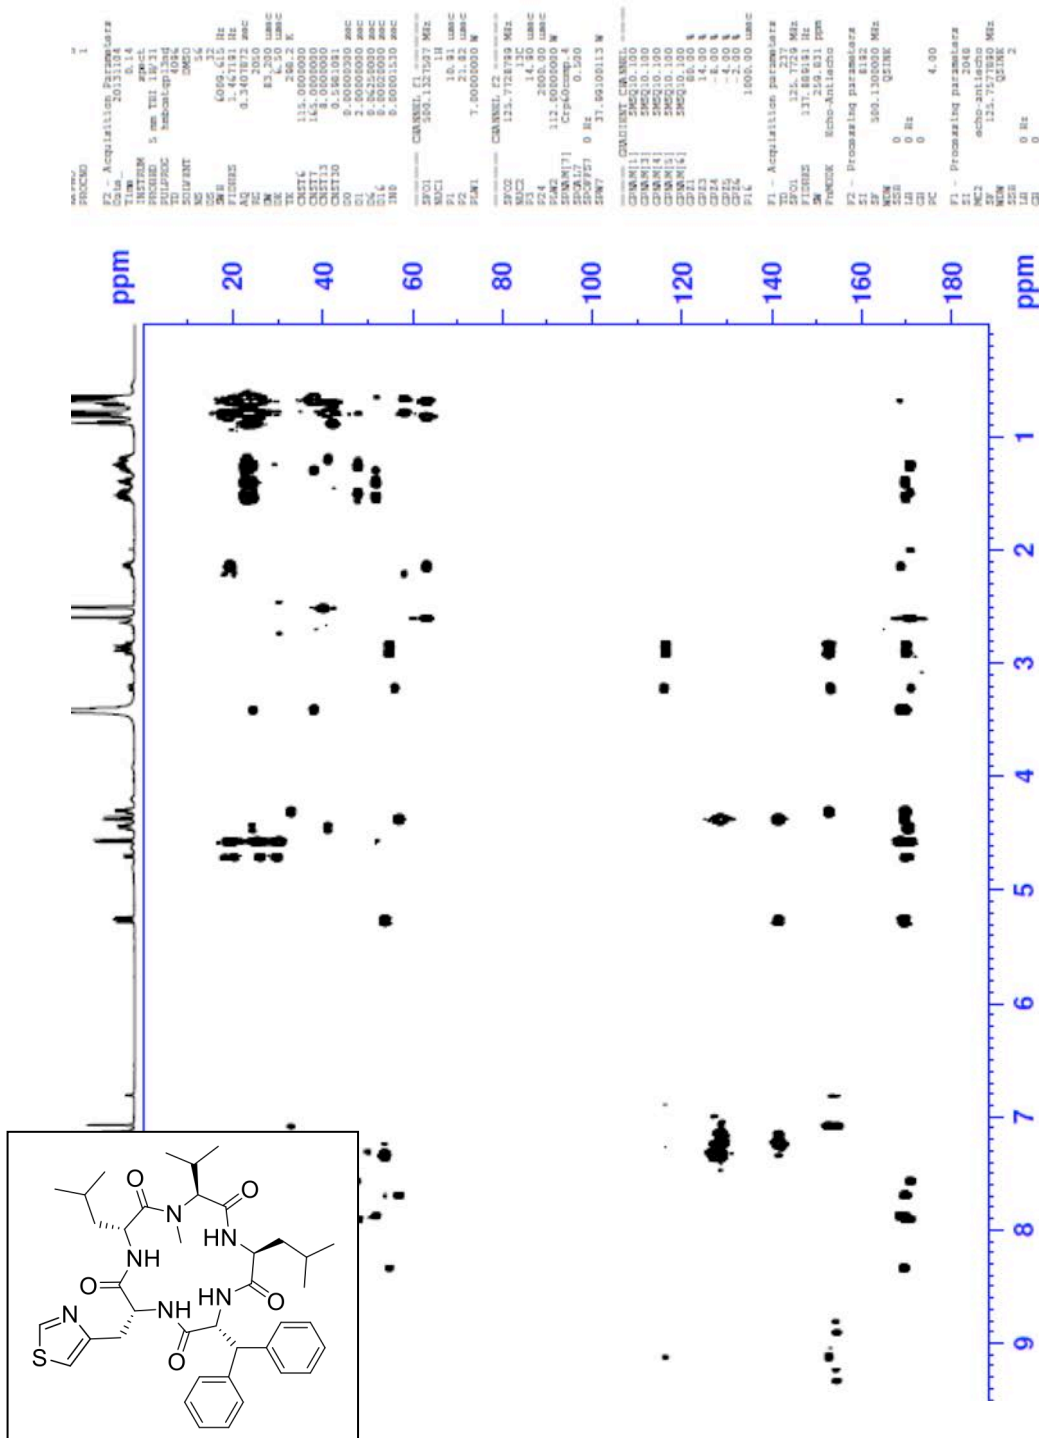

# Supporting Information

## Compound 7-tag: LCMS of DDLP 7-TagII

4/02/2014 15:24:33 1 / 1

### ==== Shimadzu LCMSsolution Analysis Report ====

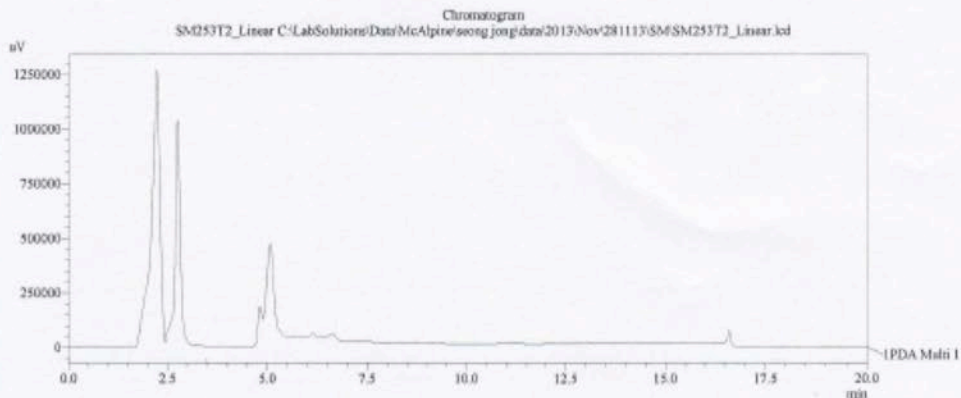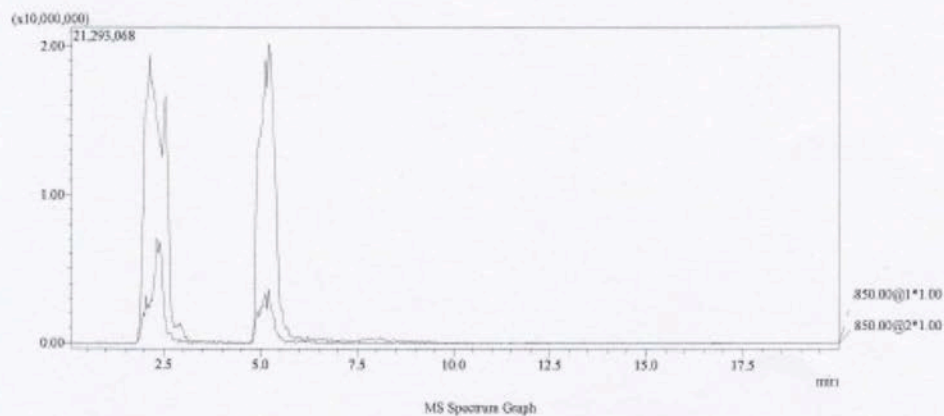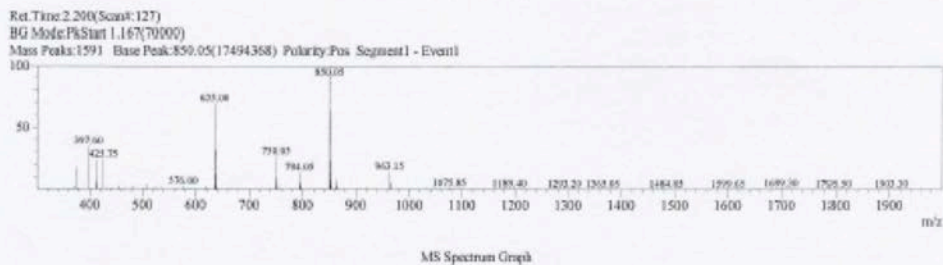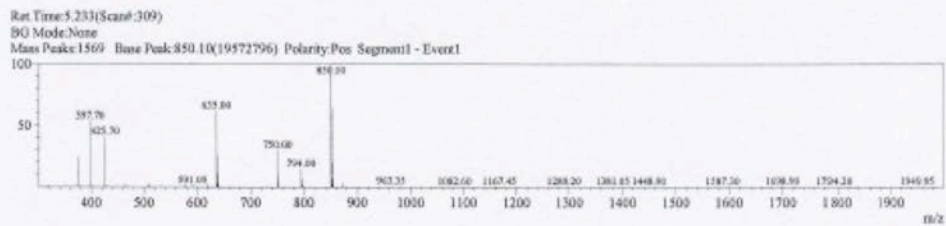

C:\LabSolutions\Data\McAlpine\seong jong\data\2013\Nov\28\1113\SM\SM253T2\_Linear.lcd

Supporting Information

Compound 7-tag: <sup>1</sup>HNMR DDLP 7-TagII

Supporting Information

Compound 7-tag: LCMS of Macrocyclic 7-Tag I

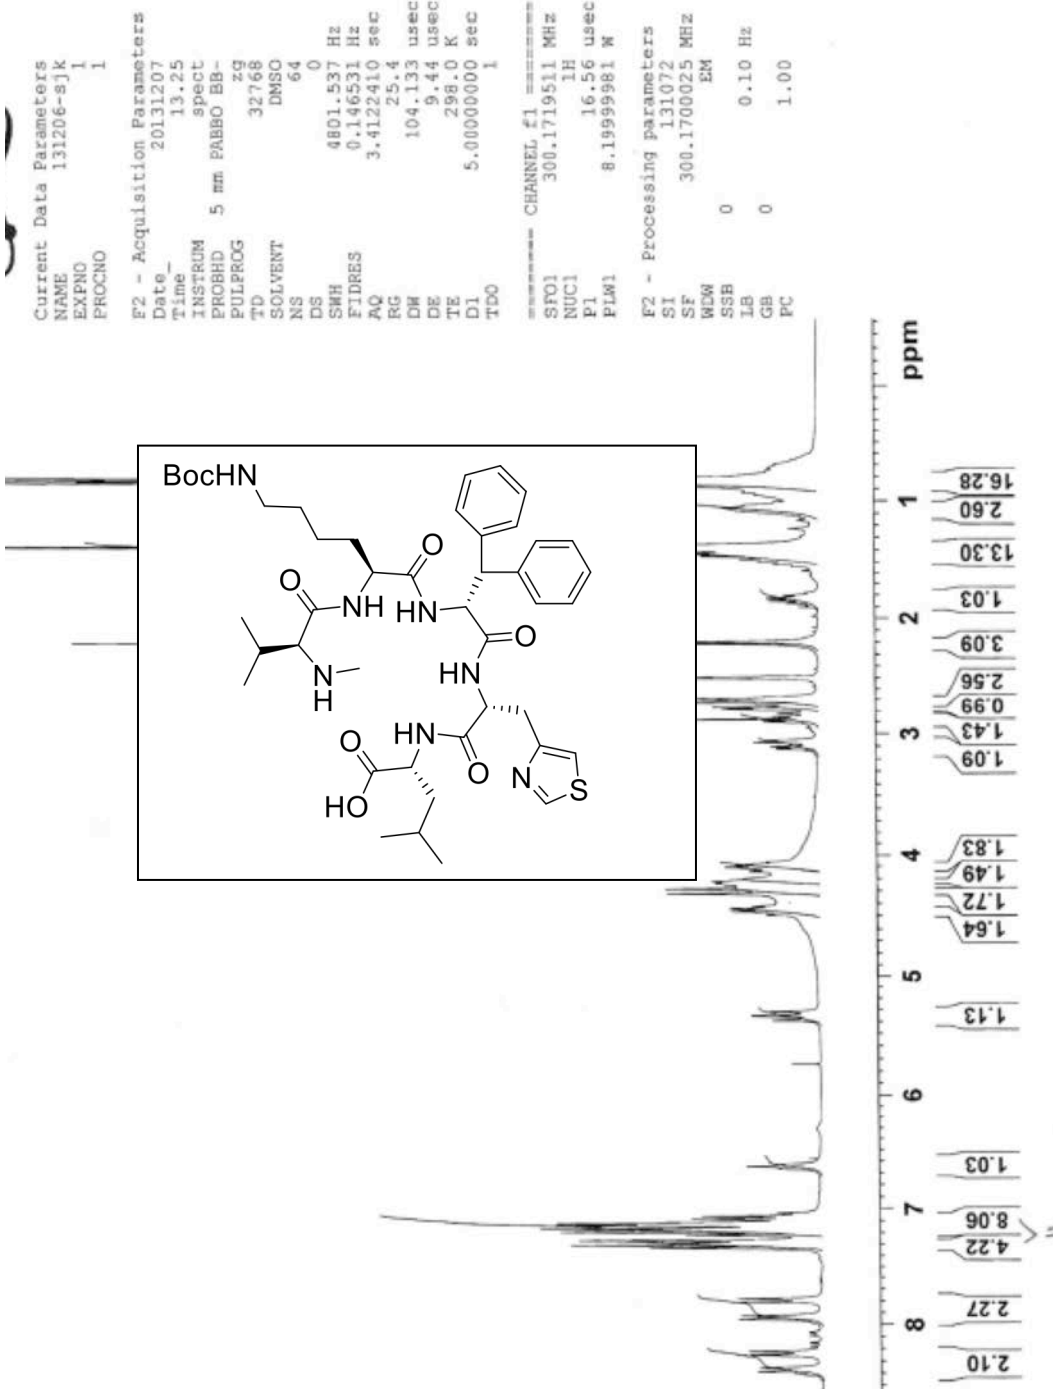

### ==== Shimadzu LCMSsolution Analysis Report ====

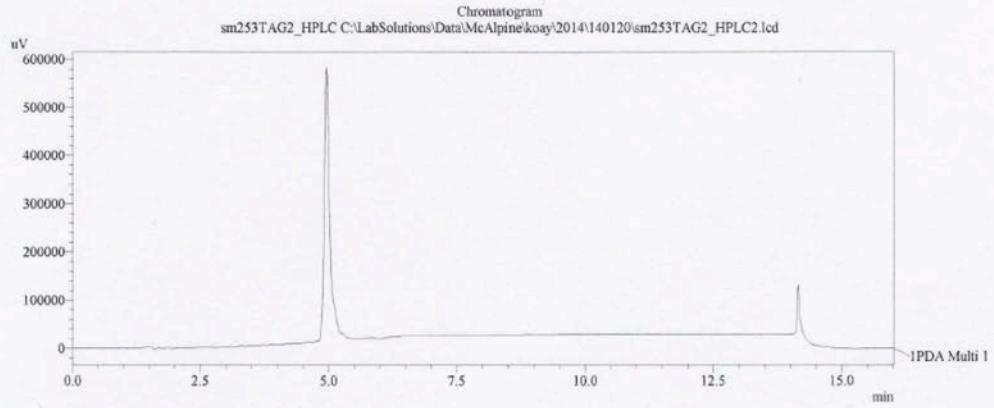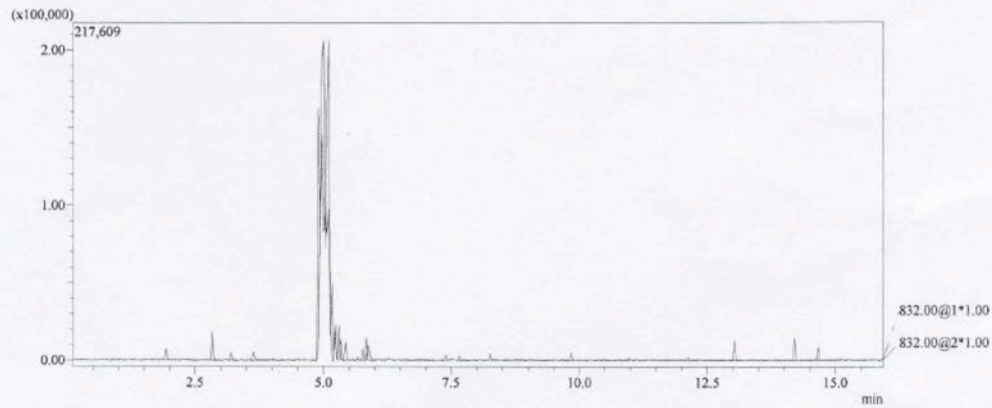

MS Spectrum Graph

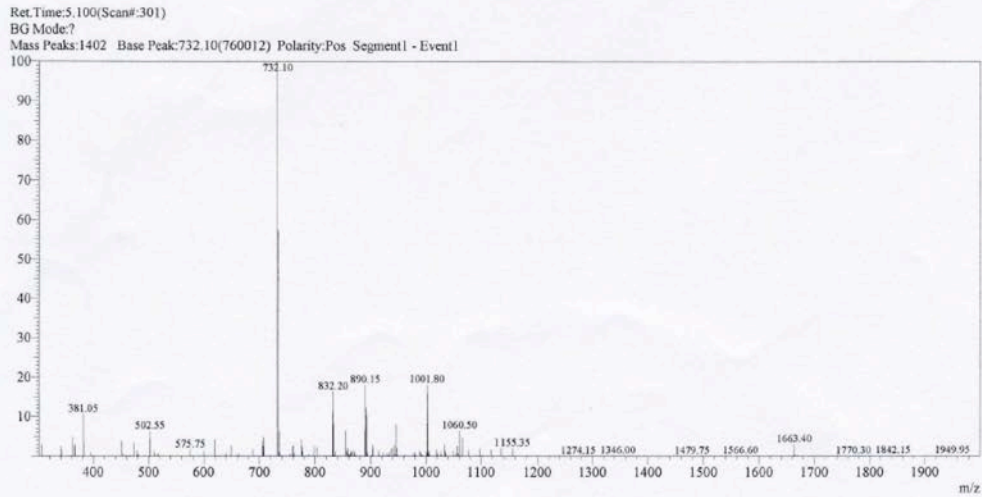

C:\LabSolutions\Data\McAlpine\koay\2014\140120\sm253TAG2\_HPLC2.lcd

### Supporting Information

# Compound 7-tag: <sup>1</sup>HNMR Macrocycle 7-TagII

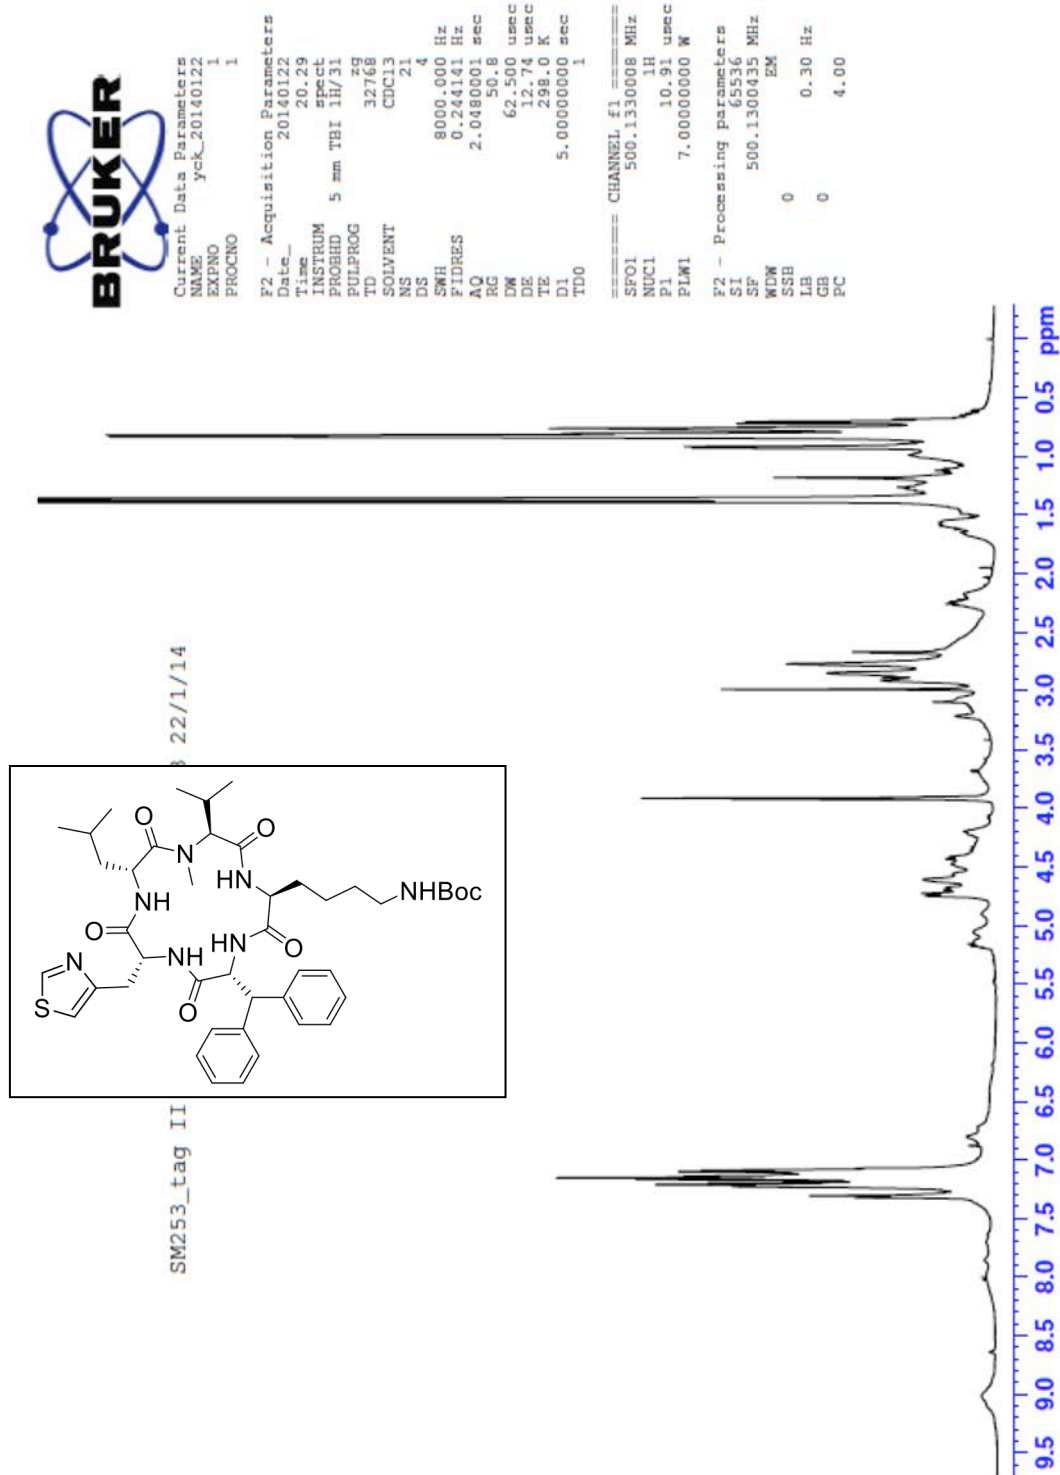

Supporting Information

# Compound 7-tag: LCMS of Boc-protected Macrocycle 7-TagII

22/01/2014 16:40:18 1 / 1

## ==== Shimadzu LCMSsolution Analysis Report ====

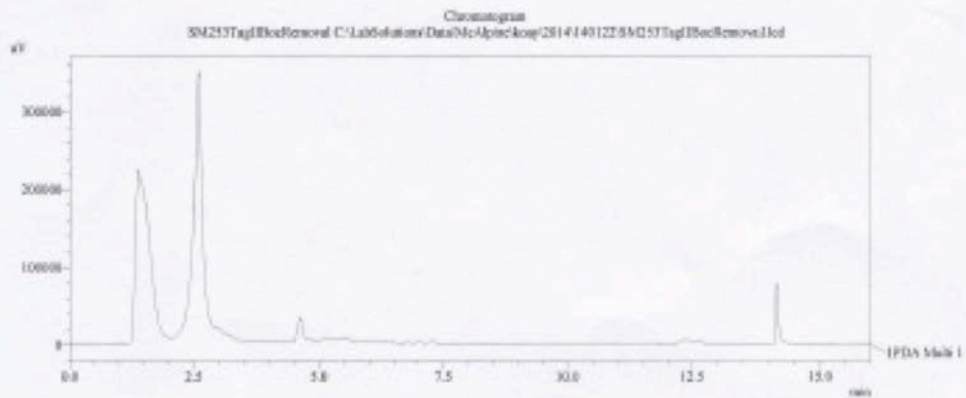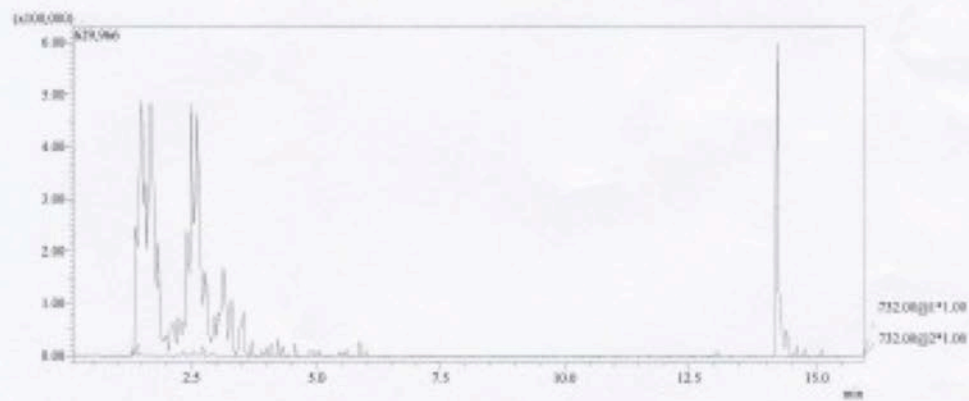

MS Spectrum Graph

Ret Time: 1.487 (Scan# 87)  
80 Mode: 7  
Mass Peaks: 1418 Base Peak: 732.080(20004) Polarity: Pos Segment: 1 - Event: 1

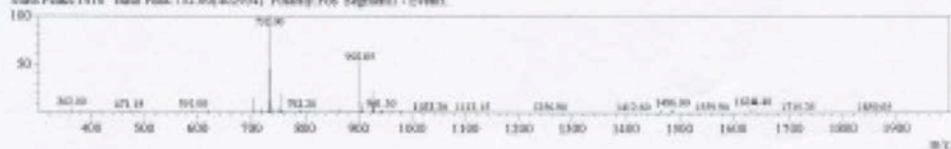

MS Spectrum Graph

Ret Time: 2.680 (Scan# 151)  
80 Mode: 7  
Mass Peaks: 1398 Base Peak: 732.080(4488) Polarity: Pos Segment: 1 - Event: 1

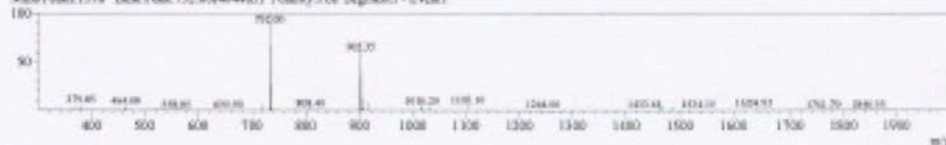

C:\LabSolutions\Data\MS\lcps\copy\2014\140122\SM253TagIBocRemoval.lcd

*Supporting Information*

# Compound 7-tag: LCMS of Macrocycle 7-Biotinylated tag

24/01/2014 16:00:44 1 / 1

## ==== Shimadzu LCMSsolution Analysis Report ====

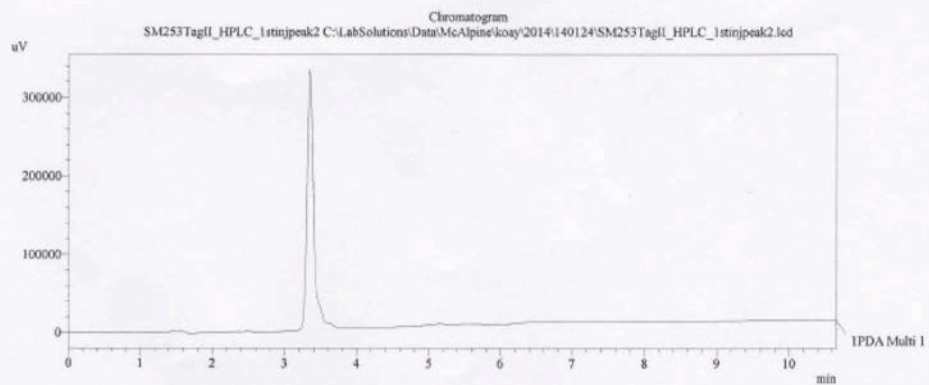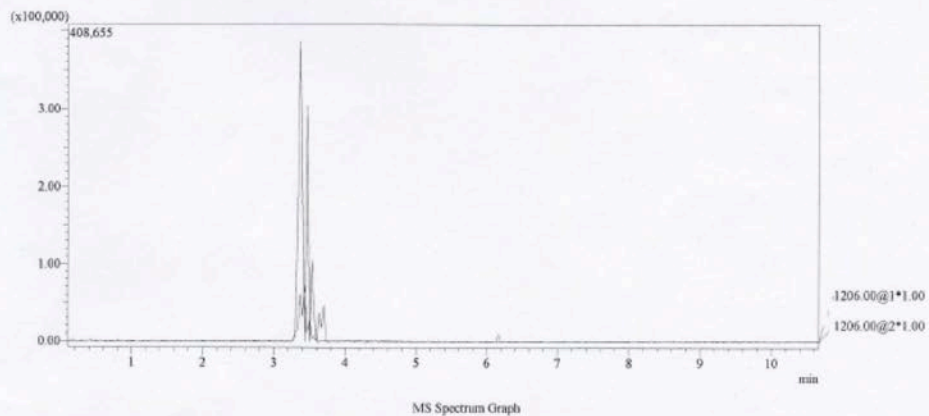

Ret Time: 3.467(Scan# 203)

BG Mode: 7

Mass Peaks: 1414 Base Peak: 603.10(1133990) Polarity: Pos Segment: 1 - Event 1

Intensity

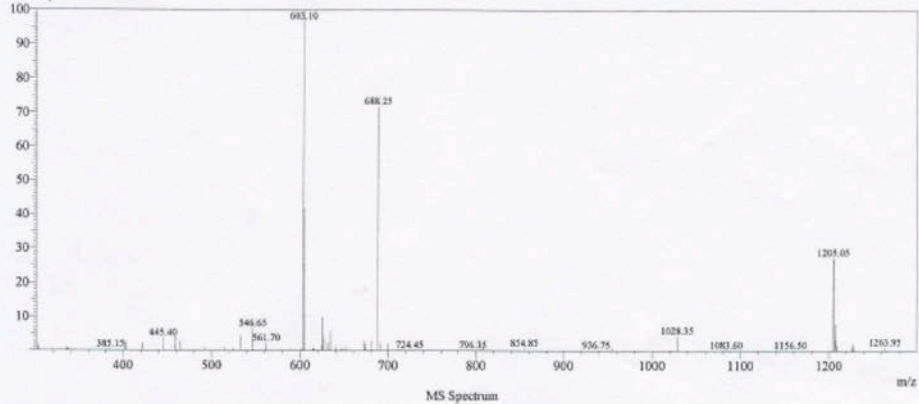

C:\LabSolutions\Data\McAlpine\koay\2014\140124\SM253TagII\_HPLC\_1stinjpeak2.lcd

*Supporting Information*



# Compound 7-tag: HRMS of Macrocycle 7-Biotinylated tag

## MS Data from Orbitrap

### Full Spectrum

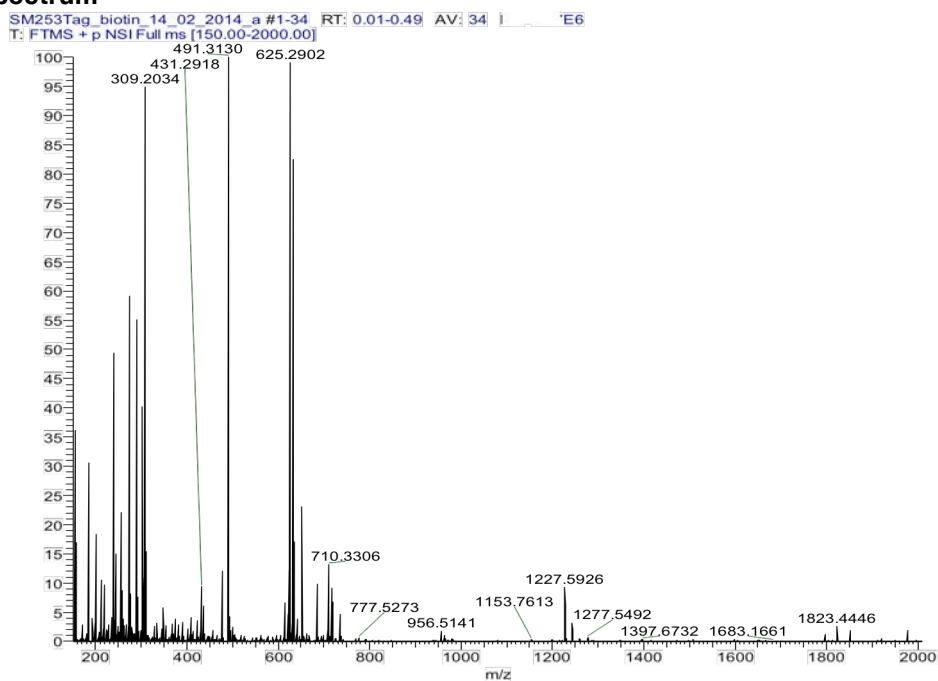

### Zoomed Spectrum

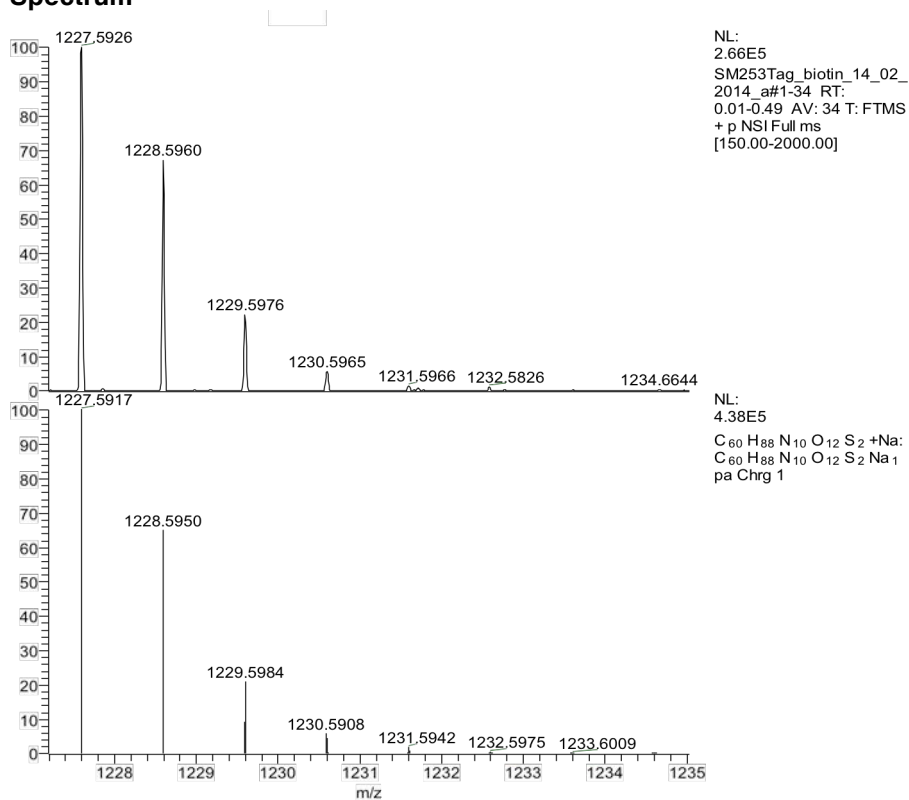

### Supporting Information











## Supporting Information

### Biology: Methodology and Results

#### Cell-cycle analysis

Cells were seeded in 6-well plates at a density of  $3 \times 10^5$  cells per well. After 24 hour-incubation at  $37^\circ\text{C}$ , cells were treated with compound 7, SM145, or 17-AAG with indicated concentrations for another 24 hours, and then fixed at  $-20^\circ\text{C}$  with 75% ethanol overnight. Fixed cells were stained with propidium iodide (Invitrogen) for cell cycle analysis using a BD LSRFortessa flow cytometer.

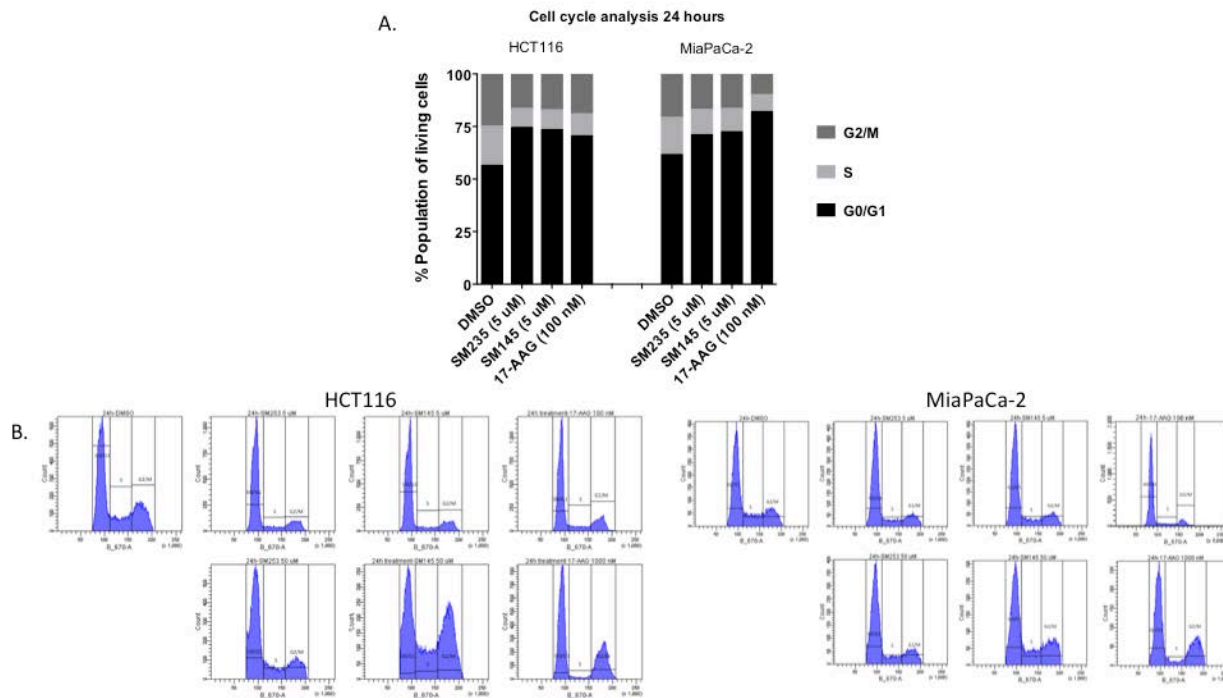

**Supplemental Figure S1: Analysis of cell cycle in HCT116 and MiaPaCa-2 cells.** A) Percentage of cells in each stage of the cell cycle for HCT116 and MiaPaCa-2 cells after 24 hours with indicated treatment. B) Raw flow cytometer data for cell cycle analysis.

#### Apoptosis analysis

Cells were seeded in 6-well plates at a density of  $3 \times 10^5$  cells per well and incubated at  $37^\circ\text{C}$  for 24 hours before indicated treatments. Treated cells were harvested, collected in phosphate buffered saline and stained with Annexin V-FITC (Biolegend) and 7AAD (Biolegend) for apoptosis analysis using BD LSRFortessa flow cytometer.

## Supporting Information

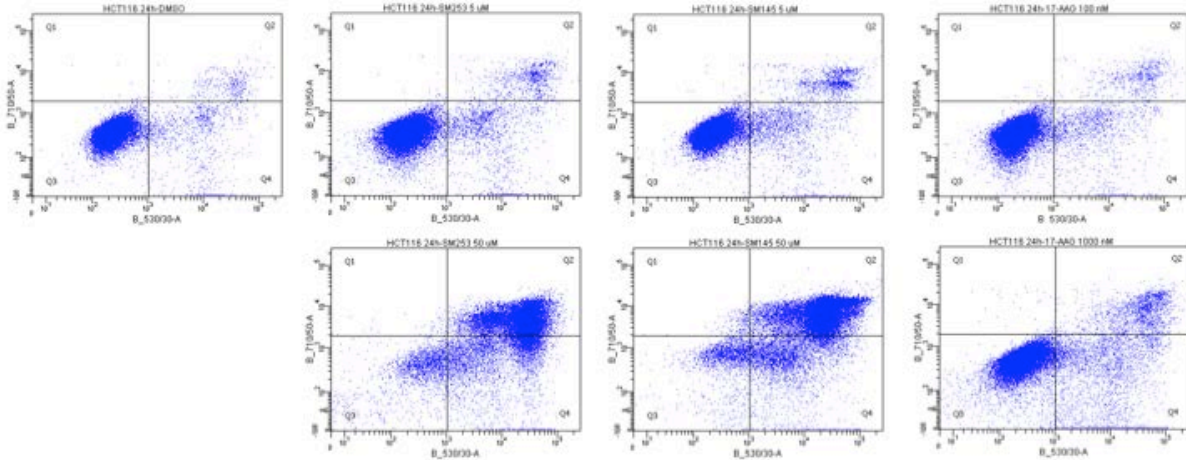

### 24 h treatment in HCT116

|                    |                      |                      |                      |                      |
|--------------------|----------------------|----------------------|----------------------|----------------------|
| DMSO               | Annexin V - / 7AAD - | Annexin V + / 7AAD - | Annexin V + / 7AAD + | Annexin V - / 7AAD + |
| Mean               | 93.05                | 3.9                  | 2.75                 | 0.25                 |
| Standard Deviation | 3.156474827          | 1.537313674          | 2.829016319          | 0.173205081          |
| SM253 (5 uM)       | Annexin V - / 7AAD - | Annexin V + / 7AAD - | Annexin V + / 7AAD + | Annexin V - / 7AAD + |
| Mean               | 87.1                 | 9.575                | 3.15                 | 0.175                |
| Standard Deviation | 3.67151195           | 5.248094892          | 1.736855396          | 0.095742711          |
| SM253 (50 uM)      | Annexin V - / 7AAD - | Annexin V + / 7AAD - | Annexin V + / 7AAD + | Annexin V - / 7AAD + |
| Mean               | 24.06                | 25.08                | 49.8                 | 1.02                 |
| Standard Deviation | 1.494322589          | 14.93810564          | 15.24335921          | 0.715541753          |
| SM145 (5 uM)       | Annexin V - / 7AAD - | Annexin V + / 7AAD - | Annexin V + / 7AAD + | Annexin V - / 7AAD + |
| Mean               | 89.425               | 6.125                | 4.2                  | 0.25                 |
| Standard Deviation | 2.670049937          | 1.8080837            | 1.119523708          | 0.129099445          |
| SM145 (50 uM)      | Annexin V - / 7AAD - | Annexin V + / 7AAD - | Annexin V + / 7AAD + | Annexin V - / 7AAD + |
| Mean               | 24.66666667          | 16.03333333          | 57.03333333          | 2.333333333          |
| Standard Deviation | 1.497776129          | 7.542325017          | 10.90168183          | 1.247330483          |
| 17-AAG (100 nM)    | Annexin V - / 7AAD - | Annexin V + / 7AAD - | Annexin V + / 7AAD + | Annexin V - / 7AAD + |
| Mean               | 91.375               | 5.5                  | 2.9                  | 0.225                |
| Standard Deviation | 1.105667219          | 0.883176087          | 0.391578004          | 0.15                 |
| 17-AAG (1000 nM)   | Annexin V - / 7AAD - | Annexin V + / 7AAD - | Annexin V + / 7AAD + | Annexin V - / 7AAD + |
| Mean               | 75.26666667          | 15.5                 | 8.4                  | 0.833333333          |
| Standard Deviation | 1.18462371           | 1.452583905          | 0.529150262          | 0.550757055          |

**Supplemental Figure S2: Annexin V and 7AAD determination of apoptosis in HCT116.** Raw flow cytometer data for annexin V and 7AAD staining.



## Supporting Information

### Caspase-3/7 induction assay

Cells were seeded at 2000 cells per well in 96-well plate, incubated at 37°C for 24 hours, and then exposed to compound 7, SM145, or 17-AAG with indicated concentrations for another 24 hours. 50 µL of Caspase-Glo 3/7 reagent (Promega) was then added into each well. After incubating for 1 hour at room temperature, 100 µL of each reaction mixture was removed and added to a white 96 well plate (Greiner Bio-One). The luminescence was measured using a luminometer (Berthold Orion Microplate Luminometer).

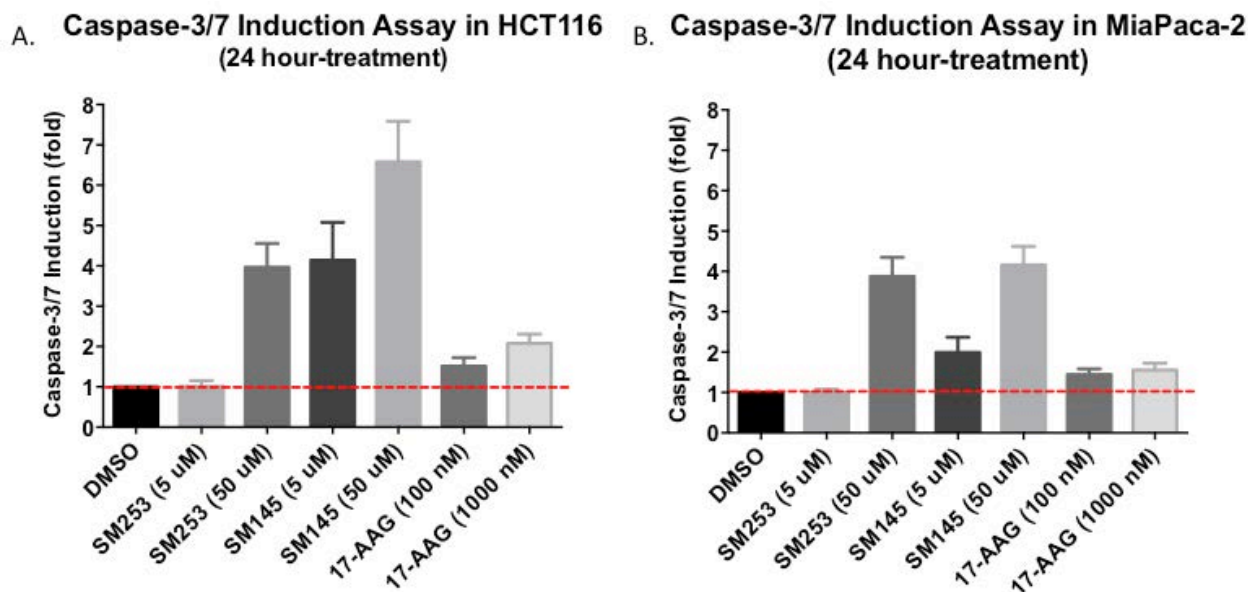

**Supplemental Figure S3: Induction of Caspase3/7 activity.** (SM253) compound 7, SM145, and 17-AAG cause apoptosis in both A) HCT 116 and B) MiaPaCa-2 cells.

### *In vitro* pulldown assays with 7-T-II (SM253) and 1-T-II in HCT-116 and MiaPaCa-2 cell lysates

Assay was performed as previously reported with modifications. REF To prepare the lysates, HCT 116 or MiaPaCa-2 cells were grown to 90% confluence and lysed at 4°C for 24 hours in lysis buffer (50mM Tris-HCl, 150mM NaCl, 2mM MgCl<sub>2</sub>, 1% (v/v) Triton X-100, pH 7.5), containing protease and phosphatase inhibitors (2µg/mL aprotinin, 0.1mM leupeptin, 1µM pepstatin A, 1mM phenylmethylsulfonamide, and 130µL of phosphatase inhibitor cocktail 2; Sigma Aldrich). Cellular debris was pelleted by centrifugation, and the concentration of soluble protein was measured by bicinchoninic acid (BCA) assay (Thermo Scientific Pierce, Rockford, Illinois, USA). Using a standard batch purification method, 5mg/ml of crude cell lysate from HCT 116 colon cancer or MiaPaCa-2 pancreatic cancer cells was incubated with biotinylated compound 7 tagged II (previously dissolved in DMSO) that had been pre-incubated with NeutrAvidin agarose (Thermo Scientific Pierce) resin for 24 hours at 4°C. The resin bound compound 7 tagged II mixture was incubated in the cell lysate for 48 hours at 4°C rocking. The resin was washed 4 times with wash buffer (20mM Tris-HCl, 300mM NaCl, 1% Triton X-100, pH 7.4) 1 time for 30 minutes, and 3 times for 15 minutes at 4°C with rocking. Proteins were eluted from the beads with sample buffer (62.5mM Tris-HCl, 2% (w/v) sodium dodecyl sulfate, 10% (v/v) glycerol,

### Supporting Information

0.1% (w/v) bromophenol blue, 100mM dithiothreitol), and the proteins were resolved on a 4-20% tris-glycine gel followed with staining with coomassie brilliant blue R-250 (Bio-Rad) or transfer to a PVDF membrane. The bands from the coomassie stained gel were excised and the protein sequences analyzed by LC/MS/MS (liquid chromatography/ tandem mass spectroscopy) at the Bioanalytical Mass Spectrometry Facility at UNSW. The PVDF membrane was blocked with 5% milk in Tris buffered Saline with 0.1% Tween-20 (TBST) for 30 minutes and then probed with a polyclonal rabbit anti hsp90 antibody (ADI-SPA-836, Enzo) for 12 hours. The primary antibody was removed and the membrane washed for 15 minutes in TBST, the secondary horseradish peroxidase (HRP) conjugated antibody was then added for 45 minutes. The membrane was washed in TBST and the bands were visualized with the LAS4000 chemiluminescence imager.

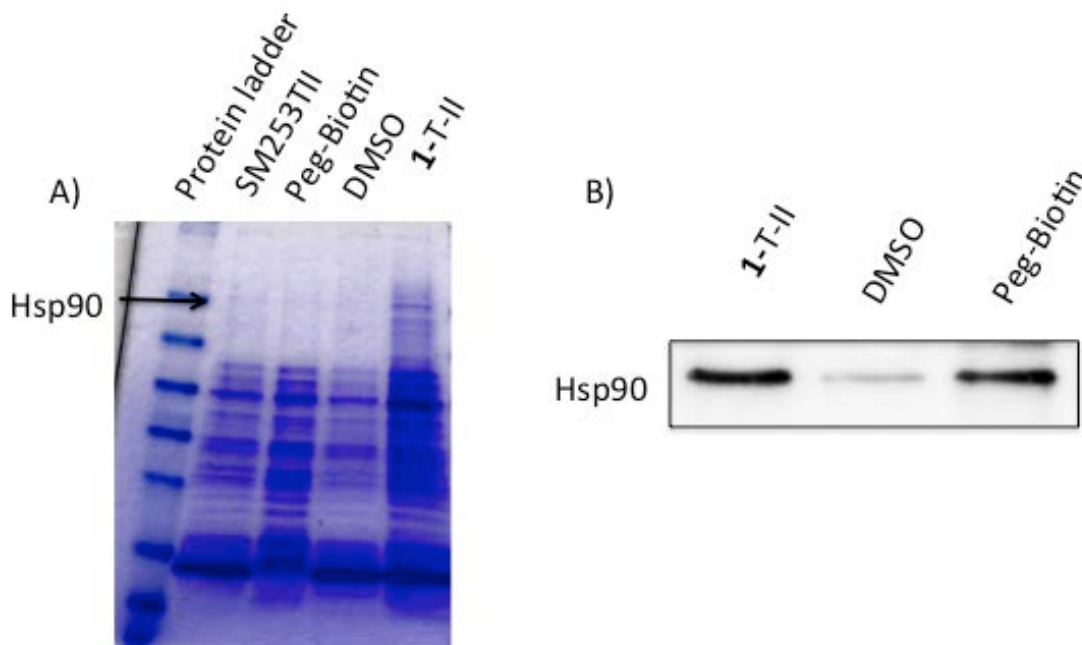

**Supplemental Figure S4:** *In vitro* pulldown assays with 7-T-II (SM253) and 1-T-II in HCT-116 and MiaPaCa-2 cell lysates. A) Proteins visualized on a 4-20% Tri-glycine gel stained with coomassie-R250. B) Validation of hsp90 as a target for compound 1\_TagII via western blot.

#### Binding Assay

The binding affinity between Hsp90 and HOP completed using 200 nM (final concentration) of human native protein Hsp90 and 100 nM (final concentration) of human recombinant his-tagged HOP. Experiments were carried out with concentrations ranging from 0-5 $\mu$ M of compound 1. Protein pull-down was completed using Talon-Metal Affinity Resin (Clontech, cat. no. 635501), followed by three washes of the beads in binding buffer and finally boiling the beads with 5x Laemmli sample buffer. Samples were analyzed using 4-20% SDS-PAGE gel, followed by standard Western blot protocol to detect Hsp90 and HOP. The respective ratio of Hsp90 to its co-chaperone or client proteins were analyzed via Image J and transformed to a percent of Hsp90 bound to co-chaperone or client proteins. Each experiment was completed with n=3.



### Supporting Information

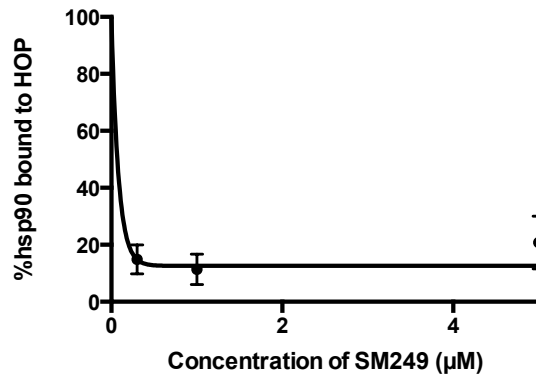

**Supplemental Figure S5:** Binding of hsp90 with HOP after increasing concentrations of compound 1.

#### Cell Lysate Analysis

Assay was performed as previously reported with modifications. REF HCT-116 or MiaPaCa-2 cells were seeded into 6 well dishes at 300,000 cells per well and allowed to adhere for 24 hours. The cells were treated with compound 7 (5 µM and 50 µM), or SM145 (5 µM), or 17-AAG (100 nM) (DMSO concentration always 1%) for 24 hours and then harvested and lysed in lysis buffer (50 mM Tris-HCl, 150 mM NaCl, 2 mM MgCl<sub>2</sub>, 1% (v/v) Triton X-100, pH 7.5) containing protease and phosphatase inhibitors (2 µg/mL aprotinin, 0.1 mM leupeptin, 1 µM pepstatin A, 1 mM phenylmethylsulfonamide, and 130 µL of phosphatase inhibitor cocktail 2; Sigma Aldrich). Cellular debris was pelleted by centrifugation, and the concentration of soluble protein was measured by bicinchoninic acid (BCA) assay (Thermo Scientific Pierce, Rockford, Illinois, USA). 30-100 µg of protein lysate was boiled with 5x Laemmli sample buffer at 100°C for 15 minutes. Samples were analyzed using 4-20% SDS-PAGE gel, followed by standard Western blot protocol using PVDF membranes. The membranes were probed with primary antibodies and then with secondary HRP conjugated antibodies to visualize the results. The respective amount of target protein was determined via Image J. The band intensity was normalized to actin, and then compared to the DMSO control. Fold changes were reported. Each experiment was completed with n = 3.

### Supporting Information

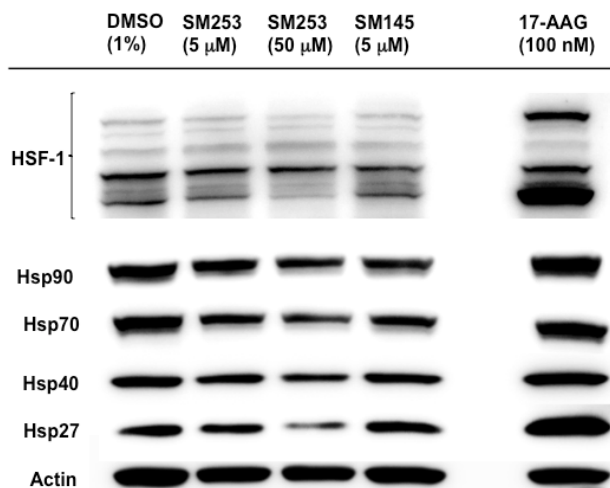

**Supplemental Figure S6:** Protein level analysis for 17-AAG in MiaPaCa-2 cells.

#### Firefly luciferase refolding assay

Assay was performed as reported previously with modifications. REF Luciferase (Novus cat. no. NB810-74573) was diluted to 100  $\mu$ g/mL and denatured at 41°C for 30 minutes. After denaturing, 1  $\mu$ L of luciferase was added to 20  $\mu$ L of rabbit reticulocyte lysate (Promega cat. no. L4960) that had been pre-incubated at 30°C with DMSO, compound **7** (5  $\mu$ M) or SM145 (5  $\mu$ M) for 5 hours. After a 2 hours incubation of the luciferase in the lysate, 5  $\mu$ L was removed and combined with 50  $\mu$ L of Bright Glo Luciferase Assay System (Promega cat. no. E2610) and read on an illuminometer (Manufacturer). Compounds were tested for direct inhibition of luciferase activity by combining 0.5  $\mu$ L of 100  $\mu$ g/mL non-denatured luciferase with the compounds, adding 50  $\mu$ L Bright Glo Luciferase Assay System and then read on illuminometer. Percent Luciferase activity was determined using the luminescence of DMSO after 2 hours as 100%, and all other samples compared to this value. Each experiment was completed with  $n = 3$ .

#### Cell culture

HCT 116 cell line (human colorectal carcinoma) and MiaPaCa-2 (human pancreas carcinoma) was obtained from ECACC. The cells were maintained in Dulbecco's Modified Eagle Medium (DMEM), supplemented with 10% fetal bovine serum (FBS) and 1% penicillin/streptomycin (Invitrogen/Life Technologies). Cells were propagated in a humidified chamber at 37°C with 5% CO<sub>2</sub>. When cells were passaged or harvested, they were rinsed with phosphate buffered saline, incubated for two minutes with 0.25% trypsin-EDTA, and then collected in DMEM to quench the trypsin.

#### Cytotoxicity Assay

HCT 116 or MiaPaCa-2 cells were seeded into 96 well plates at 2000 cells per well and allowed to adhere overnight. The cells were treated with varying concentrations of compound **1** and **7** (300 nM – 30  $\mu$ M) (DMSO concentration always 1%) for 72 hours. After 72 hours the media was

## Supporting Information

removed and replaced with 100  $\mu\text{L}$  of DMEM with 10  $\mu\text{L}$  of Cell Counting Kit 8 reagent (Dojindo). The cells were then left in the incubator at 37°C with 5%  $\text{CO}_2$  for 2-4 hours and then the absorbance was read according to the manufactures protocol using a Chromate plate reader.

HCT116

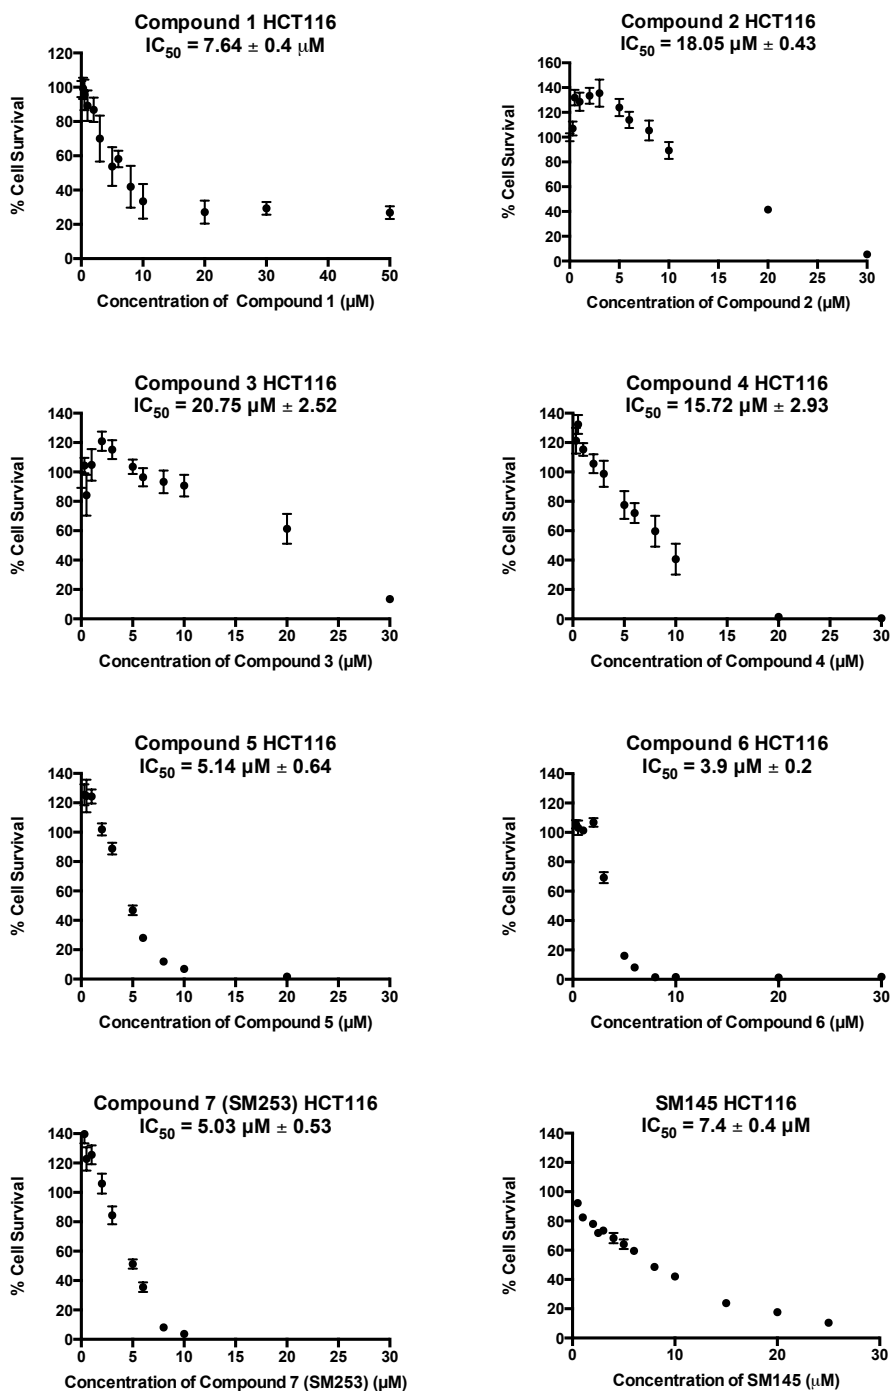

# MiaPaCa-2

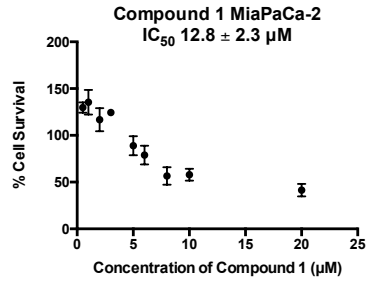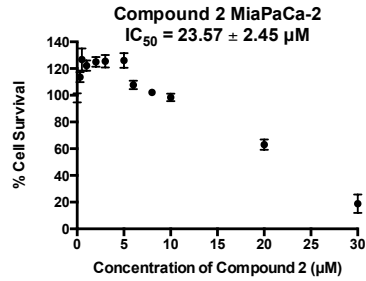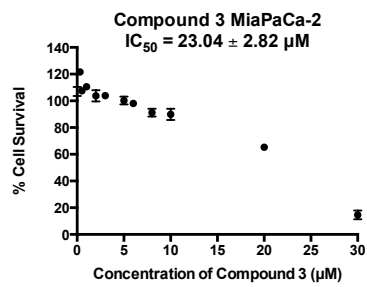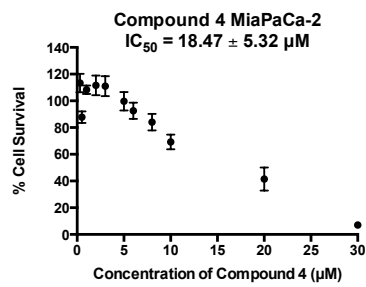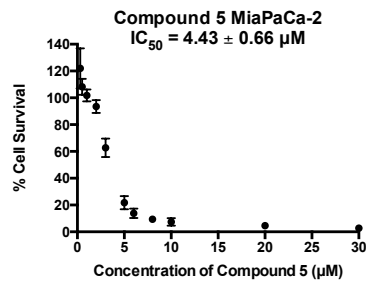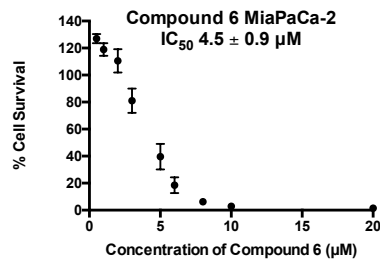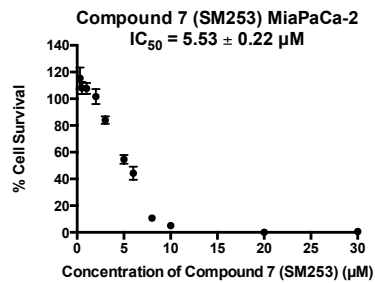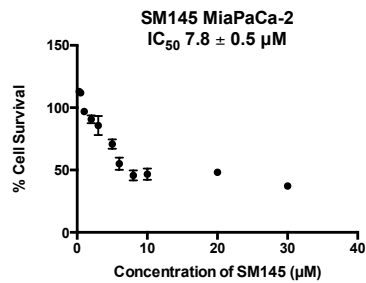

## 17-AAG

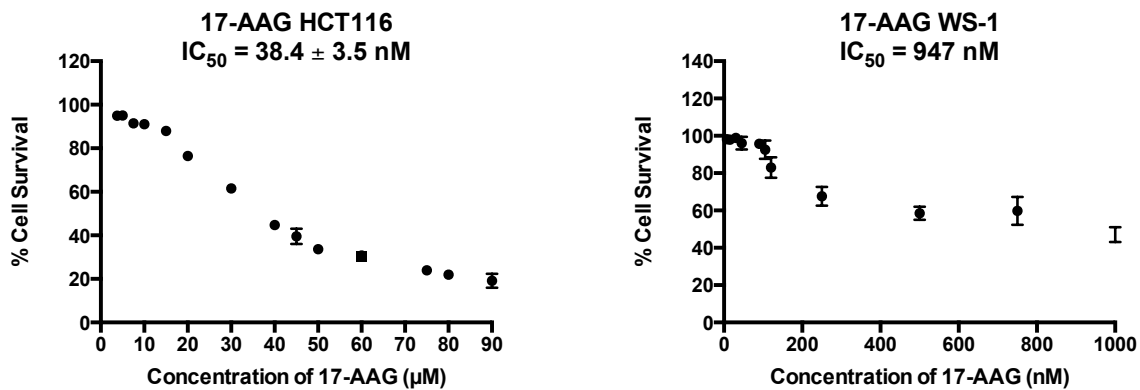

**Supplemental Figure S7:**  $IC_{50}$  curves for compound 1, 2, 3, 4, 5, 6, 7 and SM145 in HCT-116 and MiaPaCa-2, and 17-AAG in HCT-116.

# Supporting Information

## MASCOT Search Results

Matrix Science Mascot Search Results

Query :  
Search title : JM\_270214\_2.r.BAW  
MS data file : D:\Data\040404\2014\February\20\JM\_270214\_2.r.BAW  
Database : NCBI nr 24\_10\_13 (20140501) sequences; 1153227487 proteins  
Timestamp : 2 Mar 2014 at 22:52:52 GMT  
Engine :  
Variable modifications : Acetyl (C), Carbamidomethyl (C), Oxidation (M)  
Missed values : Monoacetylation  
Protein Mass : Unrestricted  
Peptide Mass Tolerance : ± 4 ppm  
Fragment Mass Tolerance : ± 0.4 Da  
Max Missed Cleavages : 1  
Enzymes type : K21-TRAP  
Number of queries : 3354  
Protein hits :

|             |                                                                                                                                                                                                                                      |
|-------------|--------------------------------------------------------------------------------------------------------------------------------------------------------------------------------------------------------------------------------------|
| 41142018    | beta-actin (Gallus gallus)                                                                                                                                                                                                           |
| 41141824    | tubulin beta-4B chain (Homo sapiens)                                                                                                                                                                                                 |
| 4113761204  | tubulin, beta 2C (Drosophila plexippus)                                                                                                                                                                                              |
| 4113767005  | actin, cytoplasmic 1 (Oryzias latipes)                                                                                                                                                                                               |
| 411528182   | beta-2 tubulin (Mus musculus)                                                                                                                                                                                                        |
| 41130882    | <b>heat shock cognate protein (Homo sapiens)</b>                                                                                                                                                                                     |
| 411431305   | 60S ribosomal protein L4 (Homo sapiens)                                                                                                                                                                                              |
| 411388402   | fatty acid synthase (Homo sapiens)                                                                                                                                                                                                   |
| 4114013204  | actin (Sus scrofa domestica)                                                                                                                                                                                                         |
| 4113262133  | predicted protein (Korarchaeum vulgare subsp. vulgare)                                                                                                                                                                               |
| 4113913029  | actin, partial (Thomomys talpoid)                                                                                                                                                                                                    |
| 4113182247  | 60 kDa heat shock protein, mitochondrial (Homo sapiens)                                                                                                                                                                              |
| 41136882    | glyoxaldehyde-phosphate dehydrogenase isoform 1 (Homo sapiens)                                                                                                                                                                       |
| 4114031814  | actin, partial (Meiogonius cf. minutus Ecuador)                                                                                                                                                                                      |
| 4113262133  | PREDCITE: glyoxaldehyde-3-phosphate dehydrogenase (Callithrix jacchus)                                                                                                                                                               |
| 4113268     | unnamed protein product (Homo sapiens)                                                                                                                                                                                               |
| 41135005    | pyruvate kinase (Homo sapiens)                                                                                                                                                                                                       |
| 4114031814  | actin, partial (Thomomys sp. South Africa)                                                                                                                                                                                           |
| 4114154428  | ActName: Full-Actin-2<br>actin, partial (Lepus sardus)                                                                                                                                                                               |
| 4113211428  | PREDCITE: tubulin alpha-1C chain-like (Pan paniscus)                                                                                                                                                                                 |
| 411361003   | Myosin (Drosophila plexippus)                                                                                                                                                                                                        |
| 4114154428  | myosin-5 (Homo sapiens)                                                                                                                                                                                                              |
| 4113211428  | tubulin alpha-1D chain (Myotis brandtii)                                                                                                                                                                                             |
| 4113211428  | PREDCITE: tubulin alpha-1C chain (Sus scrofa domestica)                                                                                                                                                                              |
| 411374911   | ATP synthase beta subunit (Rattus norvegicus)                                                                                                                                                                                        |
| 4114031814  | alpha-mucase isoform 1 (Homo sapiens)                                                                                                                                                                                                |
| 4114031814  | elongation factor 2 (Homo sapiens)                                                                                                                                                                                                   |
| 411361003   | cytochrome 9 (Homo sapiens)                                                                                                                                                                                                          |
| 41141544    | unnamed protein product (Feline sarcoma virus)                                                                                                                                                                                       |
| 4114031814  | 60S ribosomal protein L10 isoform 1 (Homo sapiens)                                                                                                                                                                                   |
| 4114031814  | Chain A, Bovine Mitochondrial F1-F0-ATPase Complexed With Aurovertin B                                                                                                                                                               |
| 4114031814  | PREDCITE: keratin, type II cytokeletal 8-like (Papio anubis)                                                                                                                                                                         |
| 411351827   | L-lactate dehydrogenase A chain isoform 1 (Homo sapiens)                                                                                                                                                                             |
| 41139547904 | PREDCITE: 60S ribosomal protein L4-like (Callithrix jacchus)                                                                                                                                                                         |
| 41139547904 | D-thyroglyoxalate dehydrogenase (Homo sapiens)                                                                                                                                                                                       |
| 4113413201  | 60S ribosomal protein L7 (Homo sapiens)                                                                                                                                                                                              |
| 4114031814  | actin (Plectroscopus trilineatus)                                                                                                                                                                                                    |
| 4114031814  | L-lactate dehydrogenase B chain (Homo sapiens)                                                                                                                                                                                       |
| 4114031814  | beta-actin (Tupaia belangeri)                                                                                                                                                                                                        |
| 4114031814  | (ribosomal protein L4 (Homo sapiens)                                                                                                                                                                                                 |
| 41130111    | cytochrome 10 (214 AA) (Homo sapiens)                                                                                                                                                                                                |
| 41139547904 | MEP87P (Homo sapiens)                                                                                                                                                                                                                |
| 4113534243  | beta-actin (Oryzias latipes)                                                                                                                                                                                                         |
| 41130882    | beta-actinin (Oryzias latipes)                                                                                                                                                                                                       |
| 4113262133  | Translational activator GCR (Myotis davidii)                                                                                                                                                                                         |
| 4113262133  | PREDCITE: Translational activator GCR (Pan paniscus)                                                                                                                                                                                 |
| 4113262133  | heat shock cognate protein (Callinectes sapidus)                                                                                                                                                                                     |
| 4113262133  | keratin 1 (Homo sapiens)                                                                                                                                                                                                             |
| 411351827   | myosin (Mus musculus)                                                                                                                                                                                                                |
| 4114031814  | unnamed protein product (Rus taurus)                                                                                                                                                                                                 |
| 4113767005  | hypothetical protein FR757025.1 - human (fragment)                                                                                                                                                                                   |
| 4113767005  | actin (Sorex araneus)                                                                                                                                                                                                                |
| 4114031814  | hypothetical protein FR757025.1 - human (fragment)                                                                                                                                                                                   |
| 4113767005  | actin, partial (Drosophila sp. Panama)                                                                                                                                                                                               |
| 4113767005  | ActName: Full-Peptide-prolyl cis-trans isomerase A; Short-PP2ase A; ActName: Full-Cyclophilin A; ActName: Full-Cyclosporin A-binding protein; ActName: Full-Rotamase A; Contains: ActName: Full-Peptide-prolyl cis-trans isomerase A |
| 4113767005  | heat shock protein, inducible (Drosophila melanogaster)                                                                                                                                                                              |
| 4113767005  | HSP70 protein (Poa trivialis)                                                                                                                                                                                                        |
| 4114031814  | 60S ribosomal protein L12 (Homo sapiens)                                                                                                                                                                                             |
| 4113767005  | cytochrome 9 (Homo sapiens)                                                                                                                                                                                                          |
| 4113767005  | MEC1 (Homo sapiens)                                                                                                                                                                                                                  |
| 4114031814  | phosphoglycerate kinase 1 (Homo sapiens)                                                                                                                                                                                             |
| 4113767005  | PREDCITE: glyoxaldehyde-3-phosphate dehydrogenase-like (Callithrix jacchus)                                                                                                                                                          |
| 4113767005  | actin                                                                                                                                                                                                                                |
| 4113767005  | aldolase A (Homo sapiens)                                                                                                                                                                                                            |
| 4113767005  | 14-3-3 protein zeta chain (cattle, brain, Peptide, 245 aa)                                                                                                                                                                           |
| 4114031814  | thioredoxin-dependent peroxidase reductase, mitochondrial isoform a precursor (Homo sapiens)                                                                                                                                         |
| 4113767005  | T-complex protein 1 subunit beta isoform a (Homo sapiens)                                                                                                                                                                            |
| 4113767005  | ubiquitin activating enzyme E1 (Homo sapiens)                                                                                                                                                                                        |
| 4113767005  | heat shock protein 70 (Hericium perlatum)                                                                                                                                                                                            |
| 4114031814  | 60S ribosomal protein L3 isoform a (Homo sapiens)                                                                                                                                                                                    |
| 4114031814  | PREDCITE: myosin-14 isoform 1 (Oryzias latipes)                                                                                                                                                                                      |

## Supporting Information

[gi|31092](#) unnamed protein product [Homo sapiens]  
[gi|307970226](#) PREDICTED: 40S ribosomal protein S6, X isoform [Octodon degus]  
[gi|537136494](#) ubiquitin carboxyl-terminal hydrolase 5 isoform 2 [Cricetulus griseus]  
[gi|1865782](#) RSC70 protein [Danio rerio]  
[gi|156547606](#) PREDICTED: heat shock 70 kDa protein cognate 4-like [Naecania vitripennis]  
[gi|13684074](#) DNA dependent protein kinase catalytic subunit [Homo sapiens]  
[gi|504176699](#) PREDICTED: heat shock 70 kDa protein 1-like [Ochotona princeps]  
[gi|13592053](#) 60S ribosomal protein L10 [Rattus norvegicus]  
[gi|1304525](#) histone H2d [Rattus norvegicus]  
[gi|4783012](#) unnamed protein product [Tetradon nigroviridis]  
[gi|466031414](#) 60S ribosomal protein L10 [Chelonis mydas]  
[gi|60552225](#) SNM2 protein, partial [Homo sapiens]  
[gi|531371](#) Cea-19 [Homo sapiens]  
[gi|1108913006](#) ATP-dependent RNA helicase A [Homo sapiens]  
[gi|197059610](#) C-1-tetrahydrofolate synthase, cytoplasmic [Pongo abelii]  
[gi|1628841](#) heat shock protein 27 [Homo sapiens]  
[gi|548423706](#) PREDICTED: 14-3-3 protein beta/delta [Capra hircus]  
[gi|47314861](#) unnamed protein product [Tetradon nigroviridis]  
[gi|537140526](#) importin subunit beta-1 [Cricetulus griseus]  
[gi|63333543](#) beta-tubulin, partial [Baicalobolus microsporus]  
[gi|4506753](#) ruvB-like 1 [Homo sapiens]  
[gi|150815](#) unnamed protein product [Mus musculus]  
[gi|4505329](#) leukotriene A-4 hydrolase isoform 1 [Homo sapiens]  
[gi|520728756](#) Chain A, Crystal Structure Of A Fusion Protein Containing The Nbd Of Hsp70 And The Middle Domain Of Hip  
[gi|4757756](#) annexin A2 isoform 2 [Homo sapiens]  
[gi|460789](#) transformation upregulated nuclear protein [Homo sapiens]  
[gi|13055529](#) 40S ribosomal protein S2 [Homo sapiens]  
[gi|2996146](#) malate dehydrogenase precursor [Homo sapiens]  
[gi|431920782](#) 60S ribosomal protein L13a [Pteropus alecto]  
[gi|256427061](#) heat shock protein 90 [Odontaspis bonariensis]  
[gi|306533](#) ribosomal protein small subunit [Homo sapiens]  
[gi|1657268](#) aminopeptidase [Homo sapiens]  
[gi|1552242](#) BR1 beta subunit (p102 protein) [Homo sapiens]  
[gi|136643](#) ribosome protein L19 [Mus musculus]  
[gi|1328517](#) Chain A, Refined Structure Of Mitochondrial Malate Dehydrogenase From Porcine Heart And The Consensus Structure For Dicarboxylic Acid Oxidoreductases  
[gi|12613443](#) DM6 protein [Human, testis, Peptide, 319 aa]  
[gi|514749793](#) PREDICTED: actin-1-like isoform X1 [Setaria italica]  
[gi|354546333](#) hypothetical protein CPAR2\_207060 [Candida parapsilosis]  
[gi|4506643](#) 60S ribosomal protein S8 [Homo sapiens]  
[gi|429489720](#) heat shock protein 90 [Paphia undulata]  
[gi|4507677](#) endoplasmic precursor [Homo sapiens]  
[gi|136796](#) t-complex polypeptide 1 [Homo sapiens]  
[gi|4523101](#) annexin A1 [Homo sapiens]  
[gi|17513316](#) ribosomal protein L14 - human  
[gi|37267](#) transketolase [Homo sapiens]  
[gi|544482](#) aldehyde dehydrogenase 6 [Homo sapiens]  
[gi|221114700](#) PREDICTED: 60S ribosomal protein L12-like isoform 1 [Hydra magnipapillata]  
[gi|404015](#) ribosomal protein L23a, partial [Homo sapiens]  
[gi|1666234](#) actin [Pisum sativum]  
[gi|134228](#) unnamed protein product [Homo sapiens]  
[gi|144156](#) non-muscle myosin B [Homo sapiens]  
[gi|11621305](#) leucine-rich FFR anti-f-coagulant protein, mitochondrial precursor [Homo sapiens]  
[gi|40287420](#) heat shock protein 90 [Cryptosporidium parvum]  
[gi|1669535](#) acp [Mus musculus]  
[gi|4506619](#) 60S ribosomal protein L24 [Homo sapiens]  
[gi|2789443](#) NIP2NIP1 protein [Homo sapiens]  
[gi|6055960](#) 60S ribosomal protein L15 [Homo sapiens]  
[gi|1706200](#) FeCName: Full-Carotene subunit gamma-1; AltName: Full-Gamma-1-coat protein; Short-Gamma-1-COP  
[gi|304414](#) elongation factor Tu [Homo sapiens]  
[gi|115451269](#) actin [Sinophysis caudata]  
[gi|133600](#) unnamed protein product [Mus musculus]  
[gi|4671702](#) T-complex protein 1 subunit epsilon [Mus musculus]  
[gi|444021](#) sub2.3 [Homo sapiens]  
[gi|13357713](#) PREDICTED: T-complex protein 1 subunit delta isoform X1 [Homo sapiens]  
[gi|192341200](#) PREDICTED: glyceraldehyde-3-phosphate dehydrogenase-like [Rattus norvegicus]  
[gi|1337514](#) ribosomal protein S6 [Homo sapiens]  
[gi|433888](#) coproporphyrinogen oxidase [Homo sapiens]  
[gi|4506611](#) 60S ribosomal protein L17 isoform a [Homo sapiens]  
[gi|17259733](#) PRO392 [Homo sapiens]  
[gi|136429](#) FeCName: Full-Trypsin; Feags: Precursor  
[gi|11621090](#) beta-tubulin [Chaetomysphaeria chlorotunicata]  
[gi|159029](#) ribosomal protein S9 [Homo sapiens]  
[gi|131859](#) glutamyl-tRNA synthetase [Homo sapiens]  
[gi|619788](#) L21 ribosomal protein [Homo sapiens]  
[gi|426350974](#) PREDICTED: uncharacterized protein LOC101141636, partial [Gorilla gorilla gorilla]  
[gi|1182011](#) NAD+-isocitrate dehydrogenase, alpha subunit [Macaca fascicularis]  
[gi|1086394](#) X-ray repair cross-complementing protein 5 [Homo sapiens]  
[gi|1793843](#) ribosomal protein L29 [Homo sapiens]  
[gi|132358](#) hnRNP U protein [Homo sapiens]  
[gi|1593071](#) ribosomal protein S5 [Homo sapiens]  
[gi|4506685](#) 40S ribosomal protein S13 [Homo sapiens]  
[gi|1621617](#) BRAB-A interacting protein [Mus musculus]  
[gi|1710491](#) FeCName: Full-60S ribosomal protein L15; AltName: Full-L15  
[gi|4506743](#) 40S ribosomal protein S8 [Homo sapiens]  
[gi|1304875](#) C protein [Homo sapiens]  
[gi|1725432](#) eukaryotic translation initiation factor 3 subunit L isoform 1 [Homo sapiens]  
[gi|1328834](#) FeCName: Full-60S ribosomal protein L23  
[gi|115449390](#) glyceraldehyde 3-phosphate dehydrogenase [Pagrus major]  
[gi|4506641](#) 60S ribosomal protein L7a [Homo sapiens]  
[gi|1263008](#) aldehyde dehydrogenase [Homo sapiens]  
[gi|192050](#) mitochondrial aspartate aminotransferase [Mus musculus]

## Supporting Information

[ql14826643](#) annexin A3 [Homo sapiens]  
[ql1403225](#) p57 [Homo sapiens]  
[ql15730027](#) KH domain-containing, RNA-binding, signal transduction-associated protein 1 isoform 1 [Homo sapiens]  
[ql11092866](#) tumor necrosis factor type 1 receptor associated protein TRAP-1 - human  
[ql138334](#) unnamed protein product [Homo sapiens]  
[ql111434026](#) 60S ribosomal protein L18a [Homo sapiens]  
[ql1170589125](#) 60S ribosomal protein S2 [Brugia malayi]  
[ql1114793397](#) Chain A, Near Structure Of The N-Terminal Domain A Of The Glycoprotein Chaperone Erp57  
[ql1178390](#) aldehyde dehydrogenase [Homo sapiens]  
[ql1122823](#) RecName: Full=60S ribosomal protein L5-A  
[ql1189754](#) pyruvate dehydrogenase beta subunit [Homo sapiens]  
[ql1226025](#) protein 40kD  
[ql1402687013](#) glyceraldehyde-3-phosphate dehydrogenase, partial [Delinchoelys reticularia]  
[ql1755744](#) p85Mm protein [Homo sapiens]  
[ql1198570](#) ribosomal protein [Mus musculus]  
[ql112455193](#) Phosphoenolpyruvate carboxylkinase 2 (mitochondrial) [Homo sapiens]  
[ql1494046](#) Chain A, Three-Dimensional Structure Of Class P1 Glutathione S-Transferase From Human Placenta In Complex With 2-Hexylglutathione At 2.8 Angstroms Resolution  
[ql13878929](#) phosphogluconate dehydrogenase [synthetic construct]  
[ql11101514](#) RNA-binding protein [Homo sapiens]  
[ql13318941](#) Chain A, Sorf6 A Novel Human Peroxidase Enzyme  
[ql1193890065](#) clathrin heavy polypeptide Bc, partial [Dendrocyllaptes certhia]  
[ql11136741](#) KIAA0003 [Homo sapiens]  
[ql1295314944](#) ribosomal protein S11 [Rypophthalmichthys molitrix]  
[ql150522490](#) cytochrome b-c1 complex subunit 2, mitochondrial precursor [Homo sapiens]  
[ql11217468](#) argyl-100A synthetase [Homo sapiens]  
[ql151744440](#) histone H1a [Homo sapiens]  
[ql1191230](#) cyclophilin, partial [Homo sapiens]  
[ql1307100](#) Tum-P91A antigen, partial [Mus musculus]  
[ql136238](#) rho GDP dissociation inhibitor [GDI] [Homo sapiens]  
[ql111583](#) ATPase, beta subunit [Hordewia vulgaris]  
[ql1183582](#) thymopletin alpha [Homo sapiens]  
[ql128317](#) unnamed protein product [Homo sapiens]  
[ql12500241](#) RecName: Full=60S ribosomal protein L11  
[ql1123368](#) RecName: Full=High mobility group protein H1; AltName: Full=High mobility group protein 1; Short=HMG-1  
[ql113489007](#) leukocyte elastase inhibitor [Homo sapiens]  
[ql134039](#) unnamed protein product [Homo sapiens]  
[ql1325632](#) casein alpha1  
[ql1423276](#) rhodanese [Homo sapiens]  
[ql13291918](#) ribosomal protein, partial [Homo sapiens]  
[ql11232079](#) h2NMB [Homo sapiens]  
[ql15031755](#) heterogeneous nuclear ribonucleoprotein K isoform 2 [Homo sapiens]  
[ql1189230](#) neuroleukin [Homo sapiens]  
[ql1292824](#) synexin [Mus musculus]  
[ql132455](#) unnamed protein product [Homo sapiens]  
[ql12762454](#) NIP2NAP2 protein [Homo sapiens]  
[ql132532](#) unnamed protein product [Homo sapiens]  
[ql13037013](#) Grey-rbp [Homo sapiens]  
[ql1116222225](#) beta tubulin, partial [Leucocryptos marina]  
[ql14506707](#) 60S ribosomal protein S25 [Homo sapiens]  
[ql134054046](#) ribosomal protein S7a [Ichthyophis barnesi]  
[ql128224](#) ATP-citrate [pcc-5]-lyase [Homo sapiens]  
[ql15483832](#) hypoxia up-regulated protein 1 precursor [Homo sapiens]  
[ql15031526](#) actin-related protein 2/3 complex subunit 4 isoform a [Homo sapiens]  
[ql1465612](#) ribosomal protein L27  
[ql157003](#) pyrimidine binding protein 1 [Rattus norvegicus]  
[ql14505725](#) phosphate carrier protein, mitochondrial isoform b precursor [Homo sapiens]  
[ql1524822341](#) PROCTED: 14-3-3 protein epsilon-like [Anolis californica]  
[ql1260337](#) annexin V-CaBP3 isoform [cattle, brain, Peptide, 320 aa]  
[ql11423409](#) Chain A, X-ray Structure Of Hn23 Human Nucleoside Diphosphate Kinase B Complexed With Gdp At 2 Angstroms Resolution  
[ql1169705](#) vacuolar H<sup>+</sup>-ATPase A subunit [Bos taurus]  
[ql152976004](#) DNA replication licensing factor MCM [Camelus ferus]  
[ql13095186](#) cargo selection protein TIP47 [Homo sapiens]  
[ql11301401](#) G-phosphofructokinase type C isoform 1 [Homo sapiens]  
[ql145259](#) talin [Mus musculus]  
[ql1404105](#) alpha-catenin [Homo sapiens]  
[ql14506675](#) dolichyl-diphosphooligosaccharide--protein glycosyltransferase subunit 1 precursor [Homo sapiens]  
[ql1488295](#) TLS protein  
[ql11703105](#) RecName: Full=Actin, cytoplasmic; AltName: Full=Actin, macronuclear  
[ql190](#) synthetase fragment (AA 67) [Bos taurus]  
[ql145781](#) ribosomal protein S1T (AA 7-135) [Gallus gallus]  
[ql135870](#) unnamed protein product [Homo sapiens]  
[ql13988148](#) ANTL [Homo sapiens]  
[ql1326630480](#) crustacean hyperglycemic hormone-like peptide precursor [Procambarus clarkii]  
[ql15031635](#) cofilin-1 [Homo sapiens]  
[ql1515634](#) ubiquinol-cytochrome c reductase core I protein [Homo sapiens]  
[ql1183582](#) glutamine:fructose-1-phosphate amidotransferase [Homo sapiens]  
[ql14503461](#) elongation factor 1-gamma [Homo sapiens]  
[ql1132949](#) RecName: Full=Putative 60S ribosomal protein L32'  
[ql130130](#) colligin [Homo sapiens]  
[ql149247220](#) signal peptidase [Prevotella buccalis]  
[ql1460350](#) Chain A, Crystal Structures Of Medium Chain Acyl-Coa Dehydrogenase From Pig Liver Mitochondria With And Without Substrate  
[ql1302414795](#) CTD kinase subunit alpha [Verticillium alfalfae VdMs.102]  
[ql11022369](#) customer protein [Homo sapiens]  
[ql1163537869](#) hypothetical protein [Monoclisia brevicollis ME1]  
[ql1123976082](#) hypothetical protein [Trichoconas vaginalis G3]  
[ql11073210](#) T-complex protein 1, beta subunit (TCP-1-BETA) [Homo sapiens]  
[ql1140310879](#) 26S proteasome non-ATPase regulatory subunit 1 [Rattus norvegicus]  
[ql14282541](#) CGI-16 protein [Homo sapiens]  
[ql1187281](#) H4 protein [Homo sapiens]  
[ql1301325922](#) acyl-coa dehydrogenase, partial [Riptortus pedestris]  
[ql1179632](#) calnexin [Homo sapiens]



## Supporting Information

- [#11407783](#) ribosomal protein S5 [Homo sapiens]
- [#114182009](#) NAD+-isocitrate dehydrogenase [Macaca fascicularis]
- [#114179285](#) KIAA0888 [Homo sapiens]
- [#114173297](#) AFP antigen heavy chain [Homo sapiens]
- [#114167023208](#) Chain A, Crystal Structure Of The Extracellular Portion Of HblygC0047
- [#11414905070](#) hypothetical protein [Methylobacter marinus]
- [#1141381](#) unnamed protein product [Saccharomyces cerevisiae]
- [#11403491](#) glycylamide ribonucleotide synthetase [Mus musculus]
- [#11180595](#) creatine kinase-B [Homo sapiens]
- [#11404764](#) heteropneustic nuclear ribonucleoprotein F [Homo sapiens]
- [#1140348406](#) dNAK protein [Trichomonas vaginalis G3]
- [#11434733](#) KIAA0030 [Homo sapiens]
- [#11418180](#) DnaJ protein homolog [Homo sapiens]
- [#11429910](#) endothelial-monocyte activating polypeptide II [Homo sapiens]
- [#11403456](#) 26S protease (28) regulatory subunit [Homo sapiens]
- [#114145764](#) ribosomal protein L31 [Homo sapiens]
- [#11396460](#) translation initiation factor eIF3 p40 subunit [Homo sapiens]
- [#111449356](#) ornithine aminotransferase, OAT [human, gyrate atrophy of the choroid and retina (GAGR) patient, Peptide Mutant, 439 aa]
- [#1140287610](#) MPO27 protein [Homo sapiens]
- [#114005416](#) NAD(P)H dehydrogenase [quinone] I isoform a [Homo sapiens]
- [#11409535](#) ribonucleoprotein, partial [Mus musculus]
- [#114080772](#) ATP synthase subunit gamma, mitochondrial isoform B (heart) precursor [Homo sapiens]
- [#114028306](#) Chain A, Solution Structure Of The C-Terminal Domain Of The Hsp60
- [#11430046](#) glycyI-tRNA synthetase [Homo sapiens]
- [#114141272](#) hypothetical protein F002503.1 [Fusarium graminearum FR-1]
- [#11427430670](#) DNA replication protein [Solenomonas sp. oral tason 137]
- [#11181899](#) SecName: Full-Sodium/potassium-transporting ATPase subunit alpha-1; Short-Sodium pump subunit alpha-1; AltName: Full-Na(+)/K(+) ATPase alpha-1 subunit; Flags: Precursor
- [#114028391](#) Ric homolog [Homo, brain, Peptide Partial, 135 aa]
- [#1140510206](#) pyruvate kinase [Varicorax sp. CF13]
- [#112352404](#) In13/Cp3 [Homo sapiens]
- [#11424241](#) asiate dehydrogenase (EC 1.1.1.137), partial [Sus scrofa]
- [#11330297](#) SecName: Full-60S ribosomal protein L26
- [#1121320307](#) Chain A, Ca2+-Binding Motif In The Crystal Structure Of The K43->Bound Mutant Human Macrophage Capping Protein Cap G
- [#11429216](#) mitochondrial acetylacetyl-CoA thiolase [Homo sapiens]
- [#1130337218](#) hypothetical protein STAIR 5963 [Strigatella maritima DSM/2-1]
- [#112804430](#) translocase of inner mitochondrial membrane Tim44 precursor [Homo sapiens]
- [#114235772](#) MARG1 [Homo sapiens]
- [#11207566](#) inosine-5'-monophosphate dehydrogenase (EC 1.1.1.205) [Homo sapiens]
- [#11289793](#) KIAA068 [Homo sapiens]
- [#114174799](#) S-adenosylmethionine--DNA ribosyltransferase-isoenzyme [Rhodospirillum rubrum]
- [#114281106](#) PAS domain-containing protein [Micrococcus sp. PCC 7113]
- [#11179230](#) asparagine synthetase [Homo sapiens]
- [#114167448](#) adenine, water dikinase [Drosophila melanogaster]
- [#114141406](#) diaminopimelate decarboxylase [Proteobacterium acetuaris DSM 271]
- [#1138701500](#) 60S ribosomal protein L6-like protein [Calothrix alii]
- [#11416442](#) thiorodan peroxidase PMP20 [Homo sapiens]
- [#1142810514](#) hypothetical protein [Syngasteria sp. 3\_1\_syn1]
- [#11436935](#) protein kinase C receptor [Rattus norvegicus]
- [#11432166](#) eIF-3 p10 subunit [Homo sapiens]
- [#110943](#) unnamed protein product [Homo sapiens]
- [#11423706](#) ATP dependent RNA helicase
- [#114146762](#) ribosomal protein S1 [Gallus gallus tibeta]
- [#11408749](#) myosin-DNAIT-regulatory light chain
- [#1110433491](#) unnamed protein product [Homo sapiens]
- [#11294168](#) P1-11659\_4 [Homo sapiens]

### Select Summary Report

Format As:  Selected Summary (protein hits) [Help](#)

Significance threshold p <=  Max. number of hits AUTO

Standard scoring  MadPIT scoring  Ions score or expect cut-off  Show sub-sets

Show pop-ups  Suppress pop-ups  Require bold red

Re-Search:  All queries  Unassigned  Below homology threshold  Below identity threshold

| 1.                         | #11420218 | Mass: 41738 | Score: 1260 | Matches: 38(17) | Sequences: 24(11) | MSA1: 2,45                   |
|----------------------------|-----------|-------------|-------------|-----------------|-------------------|------------------------------|
| beta-actin [Gallus gallus] |           |             |             |                 |                   |                              |
| Query                      | Observed  | Ms (exp.)   | Ms (calc)   | ppm             | Miss Score        | Expect Rank Unique Peptide   |
| <a href="#">260</a>        | 486-7277  | 975.4628    | 975.4610    | -0.17           | 0                 | 81 2.2e-005 1 K.AGFAEDADR.A  |
| <a href="#">273</a>        | 518-8295  | 1035.6444   | 1035.6440   | 0.41            | 1                 | 37 0.097 1 K.EKTIADPP.R      |
| <a href="#">1114</a>       | 589-3105  | 1176.6064   | 1176.6060   | 0.38            | 0                 | 56 0.011 1 K.EYVALAPTK.I     |
| <a href="#">1116</a>       | 599-7650  | 1197.5154   | 1197.5150   | 0.41            | 0                 | 67 0.0043 1 K.DYVDSGQSK.R    |
| <a href="#">1118</a>       | 599-8166  | 1197.6984   | 1197.6980   | 0.38            | 0                 | 42 0.12 1 R.AYVDSGQSK.R      |
| <a href="#">1187</a>       | 602-2845  | 1202.5544   | 1202.5536   | 0.68            | 0                 | 33 1.3 1 R.HQVAVGQSK.D       |
| <a href="#">1419</a>       | 677-8153  | 1353.6160   | 1353.6161   | -0.01           | 1                 | 77 6.4e-005 1 K.DYVDSGQSK.Q  |
| <a href="#">1776</a>       | 709-9005  | 1417.7964   | 1417.7850   | 1.01            | 1                 | 32 1.1 1 K.EYVALAPTKQK.I     |
| <a href="#">1846</a>       | 758-8558  | 1515.6970   | 1515.6954   | 1.16            | 0                 | 35 0.94 1 K.QYVDSGQSK.R      |
| <a href="#">2019</a>       | 782-9058  | 1563.7980   | 1563.8000   | -0.20           | 1                 | (41) 0.093 1 R.MKDTALAPTK.I  |
| <a href="#">2040</a>       | 782-9062  | 1563.8018   | 1563.8000   | 0.17            | 1                 | (58) 0.0074 1 R.MKDTALAPTK.I |
| <a href="#">2041</a>       | 827-6058  | 1579.7956   | 1579.7949   | 0.40            | 1                 | (27) 6.8 7 R.MKDTALAPTK.I    |
| <a href="#">2081</a>       | 790-9053  | 1579.7960   | 1579.7949   | 0.70            | 1                 | 78 2.5e-005 1 R.MKDTALAPTK.I |
| <a href="#">2176</a>       | 813-9235  | 1625.8324   | 1625.8334   | -0.41           | 1                 | 25 22 1 R.DLVVAVGQSK.G       |

## Supporting Information

|      |           |           |           |       |   |      |          |   |                                    |
|------|-----------|-----------|-----------|-------|---|------|----------|---|------------------------------------|
| 2180 | 815.4156  | 1628.8166 | 1628.8150 | 0.30  | 1 | 40   | 0.37     | 1 | R.GYPTTARRKIVR.D                   |
| 2207 | 820.4222  | 1638.8298 | 1638.8287 | 0.71  | 1 | 29   | 0.43     | 1 | R.LDLAGRLDYLK.I                    |
| 2413 | 872.9466  | 1743.8784 | 1743.8792 | -0.29 | 1 | 31   | 3.9      | 1 | K.ILTERPFTTARR.E                   |
| 2501 | 895.9501  | 1789.8954 | 1789.8946 | 0.57  | 0 | 87   | 8.7e-056 | 1 | K.SYKIDGGVITIGKR.F.2500.2502.2503  |
| 2773 | 852.0265  | 1953.0577 | 1953.0571 | 0.29  | 0 | (35) | 0.83     | 3 | R.VAVERHPVLLTEADLHW.A              |
| 2780 | 977.5366  | 1953.0584 | 1953.0571 | 0.79  | 0 | 52   | 0.015    | 1 | R.VAVERHPVLLTEADLHW.A              |
| 2947 | 1047.5350 | 2093.0554 | 2093.0542 | 0.62  | 1 | 34   | 1.5      | 1 | K.SYKIDGGVITIGKR.F.C               |
| 2997 | 719.3839  | 2155.1299 | 2155.1287 | 0.55  | 1 | 33   | 2.2      | 1 | K.AGFVGGDQKAVTPTVGRS.H             |
| 3040 | 1116.0360 | 2230.0574 | 2230.0576 | -0.07 | 0 | 66   | 8.8e-057 | 1 | K.DLVYHFTLGGTTPGIDLR.N             |
| 3079 | 765.7514  | 2294.2324 | 2294.2382 | -2.56 | 1 | 35   | 0.53     | 1 | R.VAVERHPVLLTEADLHW.H.E            |
| 3087 | 789.6957  | 2366.0653 | 2366.0631 | 0.91  | 1 | (33) | 1.2      | 1 | R.HQVAVVGGQDQVYVGEAGK.R            |
| 3102 | 596.5211  | 2382.0553 | 2382.0580 | -1.15 | 1 | (28) | 2.9      | 1 | R.HQVAVVGGQDQVYVGEAGK.R            |
| 3103 | 785.0269  | 2382.0589 | 2382.0580 | 0.35  | 1 | 34   | 0.71     | 1 | R.HQVAVVGGQDQVYVGEAGK.R            |
| 3104 | 1192.0380 | 2382.0614 | 2382.0580 | 1.44  | 1 | (25) | 6.4      | 3 | R.HQVAVVGGQDQVYVGEAGK.R            |
| 3178 | 850.7294  | 2549.1664 | 2549.1605 | -0.06 | 0 | (23) | 13       | 2 | K.LCVVLDLFFQDQATAASSSLK.S          |
| 3187 | 1283.5830 | 2565.1514 | 2565.1614 | -3.89 | 0 | 61   | 1.5e-054 | 1 | K.LCVVLDLFFQDQATAASSSLK.S          |
| 3188 | 856.0613  | 2565.1621 | 2565.1614 | 0.25  | 0 | (61) | 0.9017   | 1 | K.LCVVLDLFFQDQATAASSSLK.S          |
| 3215 | 878.7571  | 2633.2465 | 2633.2465 | 1.11  | 1 | 84   | 1.5e-055 | 1 | K.DLVYHFTLGGTTPGIDLR.H             |
| 3315 | 1061.8780 | 3182.6132 | 3182.6071 | 1.61  | 0 | (50) | 0.028    | 1 | R.TTQVMDGGDQVTVVTVYVALPHALR.L.1311 |
| 3318 | 1067.2080 | 3198.6032 | 3198.6020 | 0.06  | 0 | 55   | 0.5097   | 1 | R.TTQVMDGGDQVTVVTVYVALPHALR.L.1311 |

**Proteins matching the same set of peptides:**

|                              |             |             |                 |                   |                                                                                                                                                                           |
|------------------------------|-------------|-------------|-----------------|-------------------|---------------------------------------------------------------------------------------------------------------------------------------------------------------------------|
| <a href="#">gi1113771</a>    | Mass: 41821 | Score: 1268 | Matches: 38(17) | Sequences: 24(11) | ReName: Full-Actin, cytoplasmic 1; AltName: Full-Beta actin                                                                                                               |
| <a href="#">gi1809561</a>    | Mass: 40982 | Score: 1268 | Matches: 38(17) | Sequences: 24(11) | gamma-actin [Mus musculus]                                                                                                                                                |
| <a href="#">gi14501895</a>   | Mass: 41710 | Score: 1268 | Matches: 38(17) | Sequences: 24(11) | actin, cytoplasmic 1 [Homo sapiens]                                                                                                                                       |
| <a href="#">gi14501897</a>   | Mass: 41766 | Score: 1268 | Matches: 38(17) | Sequences: 24(11) | actin, cytoplasmic 2 [Homo sapiens]                                                                                                                                       |
| <a href="#">gi116258401</a>  | Mass: 40978 | Score: 1268 | Matches: 38(17) | Sequences: 24(11) | actin, beta, partial [Homo sapiens]                                                                                                                                       |
| <a href="#">gi116924333</a>  | Mass: 40477 | Score: 1268 | Matches: 38(17) | Sequences: 24(11) | Unknown (protein for IMAGE:3538275), partial [Homo sapiens]                                                                                                               |
| <a href="#">gi133415846</a>  | Mass: 41754 | Score: 1268 | Matches: 38(17) | Sequences: 24(11) | cytoplasmic actin type 4 [Pelophylax lessonae]                                                                                                                            |
| <a href="#">gi137698410</a>  | Mass: 41460 | Score: 1268 | Matches: 38(17) | Sequences: 24(11) | beta-actin [Passer domesticus]                                                                                                                                            |
| <a href="#">gi145249029</a>  | Mass: 44763 | Score: 1268 | Matches: 38(17) | Sequences: 24(11) | cytoskeletal beta actin, partial [Sus scrofa]                                                                                                                             |
| <a href="#">gi145634311</a>  | Mass: 41738 | Score: 1268 | Matches: 38(17) | Sequences: 24(11) | actin, cytoplasmic 2 [Mesopos (Sillurana) tropicalis]                                                                                                                     |
| <a href="#">gi147488068</a>  | Mass: 41724 | Score: 1268 | Matches: 38(17) | Sequences: 24(11) | actin, cytoplasmic 1 [Mesopos (Sillurana) tropicalis]                                                                                                                     |
| <a href="#">gi154696726</a>  | Mass: 41823 | Score: 1268 | Matches: 38(17) | Sequences: 24(11) | actin, beta [synthetic construct]                                                                                                                                         |
| <a href="#">gi156119084</a>  | Mass: 41809 | Score: 1268 | Matches: 38(17) | Sequences: 24(11) | actin, cytoplasmic type 5 [Gallus gallus]                                                                                                                                 |
| <a href="#">gi160388477</a>  | Mass: 41775 | Score: 1268 | Matches: 38(17) | Sequences: 24(11) | ReName: Full-Actin, cytoplasmic 1; AltName: Full-Beta-actin; Contains: ReName: Full-Actin, cytoplasmic 1, N-terminally processed                                          |
| <a href="#">gi160653027</a>  | Mass: 41879 | Score: 1268 | Matches: 38(17) | Sequences: 24(11) | actin gamma 1 [synthetic construct]                                                                                                                                       |
| <a href="#">gi162897409</a>  | Mass: 41694 | Score: 1268 | Matches: 38(17) | Sequences: 24(11) | beta actin variant [Homo sapiens]                                                                                                                                         |
| <a href="#">gi162897471</a>  | Mass: 41694 | Score: 1268 | Matches: 38(17) | Sequences: 24(11) | beta actin variant [Homo sapiens]                                                                                                                                         |
| <a href="#">gi166735458</a>  | Mass: 41738 | Score: 1268 | Matches: 38(17) | Sequences: 24(11) | beta-actin [Phaeocharax cimerus]                                                                                                                                          |
| <a href="#">gi174333564</a>  | Mass: 41724 | Score: 1268 | Matches: 38(17) | Sequences: 24(11) | unnamed protein product [Mus musculus]                                                                                                                                    |
| <a href="#">gi174333566</a>  | Mass: 41784 | Score: 1268 | Matches: 38(17) | Sequences: 24(11) | unnamed protein product [Mus musculus]                                                                                                                                    |
| <a href="#">gi174333574</a>  | Mass: 41724 | Score: 1268 | Matches: 38(17) | Sequences: 24(11) | unnamed protein product [Mus musculus]                                                                                                                                    |
| <a href="#">gi182195535</a>  | Mass: 41752 | Score: 1268 | Matches: 38(17) | Sequences: 24(11) | ReName: Full-Actin, cytoplasmic 2; AltName: Full-Cytoplasmic actin type 5; AltName: Full-Gamma-actin; Contains: ReName: Full-Actin, cytoplasmic 2, N-terminally processed |
| <a href="#">gi182195546</a>  | Mass: 41724 | Score: 1268 | Matches: 38(17) | Sequences: 24(11) | ReName: Full-Actin, cytoplasmic 2; AltName: Full-Gamma-actin; Contains: ReName: Full-Actin, cytoplasmic 2, N-terminally processed                                         |
| <a href="#">gi1318418977</a> | Mass: 40552 | Score: 1268 | Matches: 38(17) | Sequences: 24(11) | beta-actin, partial [Eubalsena glacialis]                                                                                                                                 |
| <a href="#">gi1326978476</a> | Mass: 41827 | Score: 1268 | Matches: 38(17) | Sequences: 24(11) | PREDUCTIN: actin, cytoplasmic type 3-like [Monodelphis domestica]                                                                                                         |
| <a href="#">gi146386681</a>  | Mass: 41718 | Score: 1268 | Matches: 38(17) | Sequences: 24(11) |                                                                                                                                                                           |

## Supporting Information

PREDICTED: actin, cytoplasmic 1 isoform X2 [Canis lupus familiaris]  
[gi|390478776](#) Mass: 132241 Score: 1257 Matches: 38(17) Sequences: 24(13)  
 PREDICTED: uncharacterized protein LOC100409004 Isoform 1 [Callithrix jacchus]

2. [gi|51214735](#) Mass: 49799 Score: 1206 Matches: 32(10) Sequences: 22(10) eMFI: 1.02  
 tubulin beta-4B chain [Homo sapiens]

| Query                | Observed | Mr (expt) | Mr (calc) | ppm   | Miss | Score | Expect   | Rank | Unique | Peptide                            |
|----------------------|----------|-----------|-----------|-------|------|-------|----------|------|--------|------------------------------------|
| <a href="#">703</a>  | 514.7636 | 1027.5126 | 1027.5121 | 0.56  | 0    | 46    | 0.076    | 1    | 1      | K.TAVCDIPFR.G                      |
| <a href="#">774</a>  | 520.3007 | 1038.5868 | 1038.5862 | 0.61  | 0    | 76    | 3.2e-305 | 1    | 1      | R.YLVVAIVR.G                       |
| <a href="#">1030</a> | 572.3212 | 1142.6278 | 1142.6270 | 0.72  | 0    | (44)  | 0.17     | 1    | 1      | K.LAVNIVVFR.L                      |
| <a href="#">1042</a> | 580.3180 | 1158.6230 | 1158.6219 | 0.95  | 0    | 66    | 0.0011   | 1    | 1      | K.LAVNIVVFR.L <a href="#">1063</a> |
| <a href="#">1345</a> | 623.3007 | 1244.5868 | 1244.5860 | 0.72  | 0    | 63    | 0.0019   | 1    | 1      | R.ISEQFTAGR.K                      |
| <a href="#">1347</a> | 629.8492 | 1257.6838 | 1257.6830 | 0.71  | 1    | 34    | 1.9      | 1    | 1      | R.FPGGSHADLR.L                     |
| <a href="#">1545</a> | 663.8640 | 1325.7124 | 1325.7126 | 0.67  | 1    | 37    | 0.53     | 1    | 1      | K.TAVCDIPFRGLK.H                   |
| <a href="#">1546</a> | 642.9130 | 1325.7142 | 1325.7126 | 1.22  | 1    | (21)  | 0.4      | 1    | 1      | K.TAVCDIPFRGLK.H                   |
| <a href="#">1549</a> | 664.8275 | 1327.6404 | 1327.6408 | -0.27 | 0    | 63    | 0.0016   | 1    | 1      | R.IPVVHEATGK.Y                     |
| <a href="#">1578</a> | 668.3532 | 1334.6920 | 1334.6904 | 1.21  | 0    | 35    | 1.2      | 1    | 1      | R.IPVVHEATGK.Y                     |
| <a href="#">1637</a> | 663.9001 | 1388.7685 | 1388.7677 | 0.56  | 1    | 46    | 0.068    | 1    | 1      | R.SGRVLTVAIVR.G                    |
| <a href="#">1733</a> | 667.9040 | 1400.6926 | 1400.6971 | 3.94  | 1    | 23    | 20       | 1    | 1      | R.ISEQFTAGR.K                      |
| <a href="#">2125</a> | 901.4141 | 1600.8136 | 1600.8131 | 0.36  | 0    | 27    | 6.5      | 1    | 1      | R.AVLVLEPFTGQVR.H                  |
| <a href="#">2137</a> | 909.4110 | 1616.9090 | 1616.9080 | 0.66  | 0    | (27)  | 7.4      | 1    | 1      | R.AVLVLEPFTGQVR.H                  |
| <a href="#">2150</a> | 910.9010 | 1619.8290 | 1619.8283 | 0.49  | 0    | (42)  | 0.33     | 2    | 2      | R.LIEFFGQFALTR.G                   |
| <a href="#">2159</a> | 940.9503 | 1619.8291 | 1619.8283 | 0.50  | 0    | 48    | 0.076    | 1    | 1      | R.LIEFFGQFALTR.G                   |
| <a href="#">2196</a> | 918.9180 | 1635.8230 | 1635.8222 | -0.09 | 0    | (23)  | 23       | 1    | 1      | R.LIEFFGQFALTR.G                   |
| <a href="#">2197</a> | 946.2824 | 1635.8254 | 1635.8222 | 1.34  | 0    | (46)  | 0.1      | 1    | 1      | R.LIEFFGQFALTR.G                   |
| <a href="#">2329</a> | 946.4267 | 1690.8588 | 1690.8600 | -0.68 | 0    | 41    | 0.39     | 1    | 1      | R.ALTVRELTDGQDAK.H                 |
| <a href="#">2340</a> | 948.9210 | 1695.8274 | 1695.8257 | 1.26  | 0    | 88    | 6.7e-206 | 1    | 1      | K.HSIVVNIHNSK.T                    |
| <a href="#">2344</a> | 954.4347 | 1704.8548 | 1704.8549 | -0.04 | 0    | (28)  | 7.2      | 1    | 1      | R.ALTVRELTDGQDAK.H                 |
| <a href="#">2606</a> | 923.4714 | 1842.9282 | 1842.9264 | 0.99  | 1    | 84    | 1.5e-305 | 1    | 1      | R.IPVVHEATGQVFR.A                  |
| <a href="#">2637</a> | 937.4716 | 1872.9286 | 1872.9291 | -0.26 | 0    | 99    | 5e-307   | 1    | 1      | K.HSATVIGHTAIGLPR.R                |
| <a href="#">2783</a> | 979.9947 | 1957.9748 | 1957.9745 | 0.16  | 0    | 94    | 1.9e-306 | 1    | 1      | K.GNTEGAEIIVDVLVVR.K               |
| <a href="#">2784</a> | 953.6657 | 1957.9753 | 1957.9745 | 0.38  | 0    | (28)  | 5.1      | 1    | 1      | K.GNTEGAEIIVDVLVVR.K               |
| <a href="#">2826</a> | 986.4434 | 1970.9722 | 1970.9747 | -1.26 | 1    | 50    | 0.022    | 1    | 1      | R.HSIVVNIHNSK.N                    |
| <a href="#">3055</a> | 672.0197 | 2013.0373 | 2013.0253 | 0.97  | 1    | 47    | 0.07     | 5    | 5      | K.HSATVIGHTAIGLPR.I                |
| <a href="#">3074</a> | 677.3497 | 2029.0273 | 2029.0302 | -1.46 | 1    | (27)  | 7.1      | 3    | 3      | K.HSATVIGHTAIGLPR.I                |
| <a href="#">3080</a> | 696.3636 | 2086.0690 | 2086.0695 | -0.25 | 1    | 35    | 1.2      | 2    | 2      | K.GNTEGAEIIVDVLVVR.K               |
| <a href="#">3249</a> | 929.4260 | 2785.2542 | 2785.2543 | 0.66  | 1    | 39    | 0.34     | 2    | 2      | R.ALTVRELTDGQDAKQVFR.H             |
| <a href="#">3251</a> | 933.4537 | 2787.3283 | 2787.3261 | 1.13  | 0    | 69    | 0.0047   | 1    | 1      | R.SGFPQIFRKHVFGQGGAGQAK.G          |

**Proteins matching the same set of peptides:**

- [gi|13542680](#) Mass: 49783 Score: 1206 Matches: 32(10) Sequences: 22(10)  
Tubulin, beta 2C [Mus musculus]
- [gi|20809888](#) Mass: 49774 Score: 1206 Matches: 32(10) Sequences: 22(10)  
Tubulin, beta 2C [Homo sapiens]
- [gi|22958133](#) Mass: 49808 Score: 1206 Matches: 32(10) Sequences: 22(10)  
Tubulin, beta 2C [Homo sapiens]
- [gi|40818568](#) Mass: 49769 Score: 1206 Matches: 32(10) Sequences: 22(10)  
tubulin beta-4B chain [Rattus norvegicus]
- [gi|118404276](#) Mass: 49800 Score: 1206 Matches: 32(10) Sequences: 22(10)  
tubulin, beta 4B class IVb [Xenopus (Silurana) tropicalis]
- [gi|119608775](#) Mass: 48794 Score: 1206 Matches: 32(10) Sequences: 22(10)  
tubulin, beta 2C, isoform CRA\_b [Homo sapiens]
- [gi|148222316](#) Mass: 49777 Score: 1206 Matches: 32(10) Sequences: 22(10)  
uncharacterized protein LOC378202 [Xenopus laevis]
- [gi|153792017](#) Mass: 49829 Score: 1206 Matches: 32(10) Sequences: 22(10)  
tubulin beta-3 chain [Gallus gallus]
- [gi|327290134](#) Mass: 49771 Score: 1206 Matches: 32(10) Sequences: 22(10)  
PREDICTED: tubulin beta-2C chain-like [Anolis carolinensis]
- [gi|395844458](#) Mass: 316943 Score: 1206 Matches: 32(10) Sequences: 22(10)  
PREDICTED: sodium-dependent phosphate transport protein 2C [Otolemur garnettii]
- [gi|403301550](#) Mass: 50403 Score: 1206 Matches: 32(10) Sequences: 22(10)  
PREDICTED: tubulin beta-4B chain [Raimiri boliviensis boliviensis]
- [gi|426263732](#) Mass: 48510 Score: 1206 Matches: 32(10) Sequences: 22(10)  
PREDICTED: tubulin beta-4 chain-like isoform 1 [Gorilla gorilla gorilla]
- [gi|426263734](#) Mass: 49229 Score: 1206 Matches: 32(10) Sequences: 22(10)  
PREDICTED: tubulin beta-4 chain-like isoform 2 [Gorilla gorilla gorilla]
- [gi|431899032](#) Mass: 68142 Score: 1206 Matches: 32(10) Sequences: 22(10)  
Tubulin beta-2C chain [Pteropus alecto]
- [gi|507644632](#) Mass: 49784 Score: 1206 Matches: 32(10) Sequences: 22(10)  
PREDICTED: tubulin beta-4B chain-like [Echinops telfairi]
- [gi|512872359](#) Mass: 49785 Score: 1206 Matches: 32(10) Sequences: 22(10)  
PREDICTED: tubulin beta-4B chain isoform XI [Heterocephalus glaber]



## Supporting Information

3. [q11357612016](#) Mass: 49895 Score: 1154 Matches: 20(11) Sequences: 20(10) eMFI: 1.15  
tubulin, beta 2C [Drosophila melanogaster]

| Query                | Observed        | Mr (expt)        | Mr (calc)        | ppm         | Miss | Score | Expect         | Rank | Unique | Peptide                                |
|----------------------|-----------------|------------------|------------------|-------------|------|-------|----------------|------|--------|----------------------------------------|
| <a href="#">703</a>  | 514.7636        | 1027.5126        | 1027.5121        | 0.54        | 0    | 46    | 0.076          | 1    | 1      | K.TAVGDIIPFR.G                         |
| <a href="#">724</a>  | 520.3007        | 1038.5868        | 1038.5862        | 0.61        | 0    | 76    | 3.2e-005       | 1    | 1      | R.YLVVAVFR.G                           |
| <a href="#">1008</a> | 572.3212        | 1142.6270        | 1142.6270        | 0.72        | 0    | (44)  | 0.17           | 1    | 1      | K.LAVNIVFFFR.L                         |
| <a href="#">1062</a> | 580.3188        | 1158.6230        | 1158.6219        | 0.95        | 0    | 66    | 0.0011         | 1    | 1      | K.LAVNIVFFFR.L <a href="#">1063</a>    |
| <a href="#">1345</a> | 623.3007        | 1244.5868        | 1244.5860        | 0.72        | 0    | 63    | 0.0019         | 1    | 1      | R.ISEQFTAFR.R                          |
| <a href="#">1387</a> | 628.8492        | 1257.6838        | 1257.6830        | 0.71        | 1    | 34    | 1.9            | 1    | 1      | R.FPGQIADLR.L                          |
| <a href="#">1565</a> | 663.8640        | 1325.7124        | 1325.7126        | 0.67        | 1    | 37    | 0.53           | 1    | 1      | K.TAVGDIIPFRGLK.H                      |
| <a href="#">1646</a> | 622.8120        | 1325.7124        | 1325.7126        | 1.22        | 1    | (20)  | 24             | 1    | 1      | K.TAVGDIIPFRGLK.H                      |
| <a href="#">1649</a> | 644.8275        | 1327.6404        | 1327.6408        | -0.27       | 0    | 63    | 0.0016         | 1    | 1      | R.INVYHEATGK.Y                         |
| <a href="#">1878</a> | 668.3533        | 1334.6900        | 1334.6904        | 1.21        | 0    | 35    | 1.2            | 1    | 1      | R.ISEQFTAFR.Y                          |
| <a href="#">1927</a> | 663.8001        | 1388.7695        | 1388.7677        | 0.58        | 1    | 46    | 0.068          | 1    | 1      | R.RGYLVAVFR.G                          |
| <a href="#">1733</a> | 667.8048        | 1400.6926        | 1400.6871        | 3.94        | 1    | 23    | 20             | 1    | 1      | R.ISEQFTAFR.K                          |
| <a href="#">3154</a> | <b>808.4220</b> | <b>1614.9294</b> | <b>1614.9297</b> | <b>0.45</b> | 0    | (52)  | <b>0.02</b>    | 1    | 1      | R.ALVVKEITQMTAK.H                      |
| <a href="#">3184</a> | <b>816.4196</b> | <b>1630.9246</b> | <b>1630.9236</b> | <b>0.63</b> | 0    | 73    | <b>0.00019</b> | 1    | 1      | R.ALVVKEITQMTAK.H <a href="#">2185</a> |
| <a href="#">3229</a> | 846.4367        | 1690.8508        | 1690.8460        | -0.48       | 0    | 41    | 0.39           | 1    | 1      | R.ALVVKEITQMTAK.H                      |
| <a href="#">3340</a> | 848.9210        | 1695.8274        | 1695.8257        | 1.08        | 0    | 88    | 6.7e-006       | 1    | 1      | K.NSDYFVNTFHWK.Y                       |
| <a href="#">3364</a> | 854.4347        | 1704.9548        | 1704.9549        | -0.08       | 0    | (28)  | 7.2            | 1    | 1      | R.ALVVKEITQMTAK.H                      |
| <a href="#">3656</a> | 922.4714        | 1842.9282        | 1842.9264        | 0.99        | 1    | 84    | 1.5e-005       | 1    | 1      | R.INVYHEATGKTVR.A                      |
| <a href="#">3657</a> | 931.4716        | 1872.9266        | 1872.9292        | -0.26       | 0    | 99    | 5e-007         | 1    | 1      | K.HSATFTIGSTAIQELPK.R                  |
| <a href="#">3783</a> | 978.9947        | 1957.9748        | 1957.9745        | 0.16        | 0    | 94    | 1.9e-006       | 1    | 1      | K.GHTTEGAEIVDSVLDVVR.K                 |
| <a href="#">3784</a> | 953.6657        | 1957.9753        | 1957.9745        | 0.28        | 0    | (29)  | 5.1            | 1    | 1      | K.GHTTEGAEIVDSVLDVVR.K                 |
| <a href="#">3855</a> | 672.0197        | 2013.0373        | 2013.0383        | 0.97        | 1    | 47    | 0.07           | 5    | 1      | K.HSATFTIGSTAIQELPK.R                  |
| <a href="#">3874</a> | 673.3497        | 2029.0273        | 2029.0302        | -1.46       | 1    | (27)  | 7.1            | 3    | 1      | K.HSATFTIGSTAIQELPK.R                  |
| <a href="#">3940</a> | 696.3636        | 2086.0690        | 2086.0695        | -0.25       | 1    | 35    | 1.2            | 2    | 1      | K.GHTTEGAEIVDSVLDVVR.K                 |
| <a href="#">3948</a> | 929.4260        | 2785.2562        | 2785.2543        | 0.66        | 1    | 39    | 0.24           | 2    | 1      | R.ALVVKEITQMTAK.H                      |
| <a href="#">3251</a> | 933.4537        | 2797.3383        | 2797.3363        | 1.13        | 0    | 69    | 0.0047         | 1    | 1      | R.SGPFQITRDRFVGGSGAGHKK.G              |

4. [q11357278351](#) Mass: 41712 Score: 1120 Matches: 34(14) Sequences: 22(9) eMFI: 1.69  
actin, cytoplasmic 1 [Crypsis latipes]

| Query                | Observed        | Mr (expt)        | Mr (calc)        | ppm         | Miss | Score | Expect     | Rank | Unique | Peptide                                                                            |
|----------------------|-----------------|------------------|------------------|-------------|------|-------|------------|------|--------|------------------------------------------------------------------------------------|
| <a href="#">860</a>  | 488.7277        | 975.4488         | 975.4410         | -0.17       | 0    | 81    | 1.2e-005   | 1    | 1      | K.AGFRGIDAPR.A                                                                     |
| <a href="#">723</a>  | 510.8295        | 1035.6444        | 1035.6440        | 0.41        | 1    | 37    | 0.097      | 1    | 1      | K.IKTIAPPER.K                                                                      |
| <a href="#">1114</a> | 589.3105        | 1176.6064        | 1176.6060        | 0.38        | 0    | 56    | 0.011      | 1    | 1      | K.EITALAPSTK.I                                                                     |
| <a href="#">1166</a> | 599.7650        | 1197.5154        | 1197.5150        | 0.41        | 0    | 67    | 0.00043    | 1    | 1      | K.DSYVGEAQGR.R                                                                     |
| <a href="#">1169</a> | 599.8566        | 1197.6984        | 1197.6982        | 0.35        | 0    | 42    | 0.12       | 1    | 1      | R.AVFRGIVFR.R                                                                      |
| <a href="#">1187</a> | 602.2845        | 1202.5544        | 1202.5536        | 0.68        | 0    | 33    | 1.3        | 1    | 1      | R.WQVWVQKDK.D                                                                      |
| <a href="#">1619</a> | 677.8153        | 1353.6160        | 1353.6163        | -0.01       | 1    | 77    | 6.4e-005   | 1    | 1      | K.DSYVGEAQGR.G                                                                     |
| <a href="#">1756</a> | 709.9805        | 1417.7864        | 1417.7850        | 1.01        | 1    | 32    | 1.1        | 1    | 1      | K.EITALAPSTK.I                                                                     |
| <a href="#">1866</a> | 718.8558        | 1515.6970        | 1515.6954        | 1.10        | 0    | 35    | 0.94       | 1    | 1      | K.QYIEGGPSTVIR.K                                                                   |
| <a href="#">2049</a> | 782.9868        | 1543.7990        | 1543.8000        | -0.42       | 1    | (47)  | 0.093      | 1    | 1      | R.HKKEITALAPSTK.I                                                                  |
| <a href="#">3050</a> | 782.9882        | 1543.8018        | 1543.8000        | 1.17        | 1    | (58)  | 0.074      | 1    | 1      | R.HKKEITALAPSTK.I                                                                  |
| <a href="#">3080</a> | 527.6058        | 1579.7954        | 1579.7949        | 0.40        | 1    | (27)  | 6.8        | 7    | 1      | R.HKKEITALAPSTK.I                                                                  |
| <a href="#">3081</a> | 780.9853        | 1579.7960        | 1579.7949        | 0.70        | 1    | 78    | 5.5e-005   | 1    | 1      | R.HKKEITALAPSTK.I                                                                  |
| <a href="#">3175</a> | 813.9235        | 1625.8324        | 1625.8334        | -0.61       | 1    | 23    | 22         | 1    | 1      | R.DLTVYGLDTER.G                                                                    |
| <a href="#">3180</a> | 815.4156        | 1628.8164        | 1628.8158        | 0.50        | 1    | 40    | 0.37       | 1    | 1      | R.GYPTTAKRIVR.D                                                                    |
| <a href="#">3207</a> | 820.4322        | 1638.8296        | 1638.8287        | 0.73        | 1    | 39    | 0.43       | 1    | 1      | R.LDLAGRDTVYK.I                                                                    |
| <a href="#">3219</a> | 872.9466        | 1743.8784        | 1743.8792        | -0.29       | 1    | 31    | 3.9        | 1    | 1      | K.ILTERGYPTTAKR.E                                                                  |
| <a href="#">3231</a> | 885.9501        | 1789.8954        | 1789.8946        | 0.57        | 0    | 87    | 9.7e-004   | 1    | 1      | K.STELFDGQVITIGRR.F <a href="#">2500</a> <a href="#">2502</a> <a href="#">2503</a> |
| <a href="#">3231</a> | <b>656.6982</b> | <b>1967.8728</b> | <b>1967.8727</b> | <b>0.02</b> | 0    | (24)  | <b>8.3</b> | 1    | 1      | R.IAFKHPVLLTEAPINPK.A                                                              |
| <a href="#">3232</a> | <b>984.5443</b> | <b>1967.8740</b> | <b>1967.8727</b> | <b>0.67</b> | 0    | 29    | <b>2.2</b> | 1    | 1      | R.IAFKHPVLLTEAPINPK.A                                                              |
| <a href="#">3247</a> | 1047.5380       | 2093.0554        | 2093.0542        | 0.62        | 1    | 34    | 1.5        | 1    | 1      | K.STELFDGQVITIGRR.F.C                                                              |
| <a href="#">3297</a> | 719.3809        | 2155.1299        | 2155.1287        | 0.53        | 1    | 31    | 2.2        | 1    | 1      | K.AGFRGIDAPRAVFRPSTVGRS.H                                                          |
| <a href="#">3040</a> | 1116.0360       | 2230.0574        | 2230.0576        | -0.07       | 0    | 96    | 8.8e-007   | 1    | 1      | K.DLVNIVGGQVTPGIDR.M                                                               |
| <a href="#">3097</a> | 789.6957        | 2346.0453        | 2346.0431        | 0.91        | 1    | (33)  | 1.2        | 1    | 1      | R.WQVWVQKDKSTVGEAQGR.R                                                             |
| <a href="#">3102</a> | 596.5211        | 2382.0553        | 2382.0580        | -1.15       | 1    | (20)  | 2.9        | 1    | 1      | R.WQVWVQKDKSTVGEAQGR.R                                                             |
| <a href="#">3103</a> | 796.0269        | 2382.0589        | 2382.0580        | 0.35        | 1    | 34    | 0.71       | 1    | 1      | R.WQVWVQKDKSTVGEAQGR.R                                                             |
| <a href="#">3104</a> | 1192.0380       | 2382.0614        | 2382.0590        | 1.44        | 1    | (25)  | 6.4        | 3    | 1      | R.WQVWVQKDKSTVGEAQGR.R                                                             |
| <a href="#">3215</a> | 878.7571        | 2433.2495        | 2433.2465        | 1.11        | 1    | 84    | 1.5e-005   | 1    | 1      | K.DLVNIVGGQVTPGIDR.M                                                               |
| <a href="#">3315</a> | 1061.8780       | 3182.6122        | 3182.6071        | 1.61        | 0    | (50)  | 0.029      | 1    | 1      | R.TTGIVGGQGVTHVPTFEGVALPAILR.L                                                     |
| <a href="#">3319</a> | 1067.8880       | 3198.6022        | 3198.6020        | 0.06        | 0    | 55    | 0.0097     | 1    | 1      | R.TTGIVGGQGVTHVPTFEGVALPAILR.L <a href="#">3111</a>                                |

5. [q113923880](#) Mass: 49572 Score: 1081 Matches: 30(11) Sequences: 20(10) eMFI: 1.16  
beta-2 tubulin [Gadus morhua]

| Query                | Observed | Mr (expt) | Mr (calc) | ppm  | Miss | Score | Expect   | Rank | Unique | Peptide                             |
|----------------------|----------|-----------|-----------|------|------|-------|----------|------|--------|-------------------------------------|
| <a href="#">703</a>  | 514.7636 | 1027.5126 | 1027.5121 | 0.56 | 0    | 46    | 0.076    | 1    | 1      | K.TAVGDIIPFR.G                      |
| <a href="#">724</a>  | 520.3007 | 1038.5868 | 1038.5862 | 0.61 | 0    | 76    | 3.2e-005 | 1    | 1      | R.YLVVAVFR.D                        |
| <a href="#">1008</a> | 572.3212 | 1142.6270 | 1142.6270 | 0.72 | 0    | (44)  | 0.17     | 1    | 1      | K.LAVNIVFFFR.L                      |
| <a href="#">1062</a> | 580.3188 | 1158.6230 | 1158.6219 | 0.95 | 0    | 66    | 0.0011   | 1    | 1      | K.LAVNIVFFFR.L <a href="#">1063</a> |
| <a href="#">1345</a> | 623.3007 | 1244.5868 | 1244.5860 | 0.72 | 0    | 63    | 0.0019   | 1    | 1      | R.ISEQFTAFR.R                       |
| <a href="#">1387</a> | 629.8492 | 1257.6838 | 1257.6830 | 0.71 | 1    | 34    | 1.9      | 1    | 1      | R.FPGQIADLR.L                       |
| <a href="#">1565</a> | 663.8640 | 1325.7124 | 1325.7126 | 0.67 | 1    | 37    | 0.53     | 1    | 1      | K.TAVGDIIPFRGLK.H                   |

## Supporting Information

|                      |                  |                  |                  |             |          |             |                 |          |                                          |
|----------------------|------------------|------------------|------------------|-------------|----------|-------------|-----------------|----------|------------------------------------------|
| <a href="#">1566</a> | 442.9120         | 1325.7142        | 1325.7126        | 1.22        | 1        | (21)        | 28              | 1        | K.YAVGIIPIPRGLK.M                        |
| <a href="#">1578</a> | 668.3533         | 1334.6820        | 1334.6904        | 1.21        | 0        | 35          | 1.2             | 1        | R.IHIVFVDFVPSK.V                         |
| <a href="#">1697</a> | 482.9301         | 1388.7685        | 1388.7677        | 0.56        | 1        | 46          | 0.068           | 1        | R.RGRITLVAVVFR.D                         |
| <a href="#">1733</a> | 467.9648         | 1400.6826        | 1400.6871        | 3.94        | 1        | 23          | 20              | 1        | R.ISEQTFAMFR.K                           |
| <a href="#">2154</a> | 808.4225         | 1614.8294        | 1614.8287        | 0.46        | 0        | (52)        | 0.52            | 1        | R.AILVLEKPGTHDSVR.S                      |
| <a href="#">2159</a> | 810.9218         | 1619.8290        | 1619.8283        | 0.49        | 0        | (42)        | 0.33            | 2        | R.LHFMGGFAPLFR.G                         |
| <a href="#">2159</a> | 540.9503         | 1619.8291        | 1619.8283        | 0.50        | 0        | 48          | 0.074           | 1        | R.LHFMGGFAPLFR.G                         |
| <a href="#">2196</a> | 816.4596         | 1630.8246        | 1630.8236        | 0.63        | 0        | 73          | 0.0019          | 1        | R.AILVLEKPGTHDSVR.S <a href="#">2185</a> |
| <a href="#">2196</a> | 810.9188         | 1635.8230        | 1635.8232        | -0.08       | 0        | (23)        | 23              | 1        | R.LHFMGGFAPLFR.G                         |
| <a href="#">2197</a> | 546.2824         | 1635.8254        | 1635.8232        | 1.34        | 0        | (46)        | 0.1             | 1        | R.LHFMGGFAPLFR.G                         |
| <a href="#">2249</a> | <b>830.4528</b>  | <b>1658.8894</b> | <b>1658.8879</b> | <b>0.91</b> | <b>0</b> | <b>27</b>   | <b>6.6</b>      | <b>1</b> | <b>R.ALVFELTQGVPEAK.W</b>                |
| <a href="#">2340</a> | 848.9210         | 1695.8274        | 1695.8257        | 1.06        | 0        | 88          | 6.7e-024        | 1        | K.HSSVYKENTPDK.Y                         |
| <a href="#">2678</a> | <b>943.4902</b>  | <b>1884.9658</b> | <b>1884.9655</b> | <b>0.17</b> | <b>0</b> | <b>88</b>   | <b>5.7e-026</b> | <b>1</b> | <b>K.HAVTFIQHSTAIQELPK.R</b>             |
| <a href="#">2793</a> | 979.9947         | 1957.9748        | 1957.9745        | 0.16        | 0        | 94          | 1.9e-024        | 1        | K.GRYTEGAEIVDGLDVR.K                     |
| <a href="#">2794</a> | 653.6657         | 1957.9753        | 1957.9745        | 0.38        | 0        | (29)        | 5.1             | 1        | K.GRYTEGAEIVDGLDVR.K                     |
| <a href="#">2836</a> | 986.4434         | 1970.9732        | 1970.9747        | -1.26       | 1        | 50          | 0.022           | 1        | R.HSSVLEKQIIVDK.H                        |
| <a href="#">2921</a> | <b>1021.5410</b> | <b>2041.8674</b> | <b>2041.8666</b> | <b>0.40</b> | <b>1</b> | <b>62</b>   | <b>0.0019</b>   | <b>1</b> | <b>K.HAVTFIQHSTAIQELPK.I</b>             |
| <a href="#">2922</a> | <b>681.3632</b>  | <b>2041.8678</b> | <b>2041.8666</b> | <b>0.56</b> | <b>1</b> | <b>(42)</b> | <b>0.16</b>     | <b>1</b> | <b>K.HAVTFIQHSTAIQELPK.I</b>             |
| <a href="#">2940</a> | 696.3636         | 2086.8690        | 2086.8695        | -0.25       | 1        | 35          | 1.2             | 2        | K.GRYTEGAEIVDGLDVR.K                     |
| <a href="#">3233</a> | <b>913.4365</b>  | <b>2737.2877</b> | <b>2737.2874</b> | <b>0.12</b> | <b>1</b> | <b>24</b>   | <b>12</b>       | <b>1</b> | <b>R.ALVFELTQGVPEAK.W</b>                |
| <a href="#">3251</a> | 933.4537         | 2787.3393        | 2787.3361        | 1.13        | 0        | 69          | 0.0047          | 1        | R.SGFPGIIRPDIIVFGQGGHDK.G                |

### Proteins matching the same set of peptides:

|                              |             |             |                 |                   |                                                                            |
|------------------------------|-------------|-------------|-----------------|-------------------|----------------------------------------------------------------------------|
| <a href="#">gi17186439</a>   | Mass: 49639 | Score: 1001 | Matches: 30(11) | Sequences: 20(10) | tubulin beta-5 chain [Mus musculus]                                        |
| <a href="#">gi12846758</a>   | Mass: 49608 | Score: 1001 | Matches: 30(11) | Sequences: 20(10) | unnamed protein product [Mus musculus]                                     |
| <a href="#">gi120489747</a>  | Mass: 49641 | Score: 1001 | Matches: 30(11) | Sequences: 20(10) | tubulin, beta 5 [Danio rerio]                                              |
| <a href="#">gi155742495</a>  | Mass: 49698 | Score: 1001 | Matches: 30(11) | Sequences: 20(10) | tubulin beta chain [Xenopus [Xenopus] tropicalis]                          |
| <a href="#">gi174141821</a>  | Mass: 49667 | Score: 1001 | Matches: 30(11) | Sequences: 20(10) | unnamed protein product [Mus musculus]                                     |
| <a href="#">gi174223737</a>  | Mass: 49652 | Score: 1001 | Matches: 30(11) | Sequences: 20(10) | unnamed protein product [Mus musculus]                                     |
| <a href="#">gi1348491289</a> | Mass: 49910 | Score: 1001 | Matches: 30(11) | Sequences: 20(10) | tubulin, beta 5 [Mus musculus]                                             |
| <a href="#">gi1221945918</a> | Mass: 46537 | Score: 1001 | Matches: 30(11) | Sequences: 20(10) | unnamed protein product [Rano zaplens]                                     |
| <a href="#">gi1291395962</a> | Mass: 49695 | Score: 1001 | Matches: 30(11) | Sequences: 20(10) | PREDICTED: tubulin, beta 5-like [Cryptolaqus cuniculus]                    |
| <a href="#">gi1332245916</a> | Mass: 53454 | Score: 1001 | Matches: 30(11) | Sequences: 20(10) | PREDICTED: tubulin beta chain isoform 3 [Nomascus leucogenys]              |
| <a href="#">gi1332245918</a> | Mass: 44790 | Score: 1001 | Matches: 30(11) | Sequences: 20(10) | PREDICTED: tubulin beta chain isoform 4 [Nomascus leucogenys]              |
| <a href="#">gi1346644702</a> | Mass: 49710 | Score: 1001 | Matches: 30(11) | Sequences: 20(10) | beta tubulin [Cricetulus griseus]                                          |
| <a href="#">gi1410905733</a> | Mass: 49655 | Score: 1001 | Matches: 30(11) | Sequences: 20(10) | PREDICTED: tubulin beta chain-like [Takifugu rubripes]                     |
| <a href="#">gi1410908666</a> | Mass: 50209 | Score: 1001 | Matches: 30(11) | Sequences: 20(10) | PREDICTED: tubulin beta chain isoform 2 [Felis catus]                      |
| <a href="#">gi1426250622</a> | Mass: 50494 | Score: 1001 | Matches: 30(11) | Sequences: 20(10) | PREDICTED: tubulin beta-5 chain isoform 2 [Ovis aries]                     |
| <a href="#">gi1426352283</a> | Mass: 50452 | Score: 1001 | Matches: 30(11) | Sequences: 20(10) | PREDICTED: tubulin beta chain isoform 4 [Gorilla gorilla gorilla]          |
| <a href="#">gi1432982728</a> | Mass: 49667 | Score: 1001 | Matches: 30(11) | Sequences: 20(10) | PREDICTED: tubulin beta chain-like [Oryzias latipes]                       |
| <a href="#">gi1432988810</a> | Mass: 49641 | Score: 1001 | Matches: 30(11) | Sequences: 20(10) | PREDICTED: tubulin beta chain-like [Oryzias latipes]                       |
| <a href="#">gi1441594011</a> | Mass: 50221 | Score: 1001 | Matches: 30(11) | Sequences: 20(10) | PREDICTED: tubulin beta chain [Nomascus leucogenys]                        |
| <a href="#">gi1449266665</a> | Mass: 44488 | Score: 1001 | Matches: 30(11) | Sequences: 20(10) | Tubulin beta-7 chain [Columba livia]                                       |
| <a href="#">gi1470614409</a> | Mass: 49145 | Score: 1001 | Matches: 30(11) | Sequences: 20(10) | PREDICTED: tubulin beta chain-like [Tursiops truncatus]                    |
| <a href="#">gi1471417838</a> | Mass: 50538 | Score: 1001 | Matches: 30(11) | Sequences: 20(10) | PREDICTED: tubulin beta chain isoform 1 [Trichechus manatus latirostris]   |
| <a href="#">gi1478502263</a> | Mass: 50453 | Score: 1001 | Matches: 30(11) | Sequences: 20(10) | PREDICTED: tubulin beta chain isoform 1 [Ceratotherium simum simum]        |
| <a href="#">gi1408527539</a> | Mass: 53861 | Score: 1001 | Matches: 30(11) | Sequences: 20(10) | PREDICTED: LOW QUALITY PROTEIN: tubulin beta chain [Dasypus novaeolinctus] |
| <a href="#">gi1498984939</a> | Mass: 49655 | Score: 1001 | Matches: 30(11) | Sequences: 20(10) | PREDICTED: tubulin beta chain-like isoform XI [Maylandia zebra]            |

## Supporting Information



[gi149898493](#) Mass: 49590 Score: 1001 Matches: 30(11) Sequences: 20(10)  
 PREDICTED: tubulin beta chain-like isoform X3 [Maylandia zebra]  
[gi1499044208](#) Mass: 49681 Score: 1001 Matches: 30(11) Sequences: 20(10)  
 PREDICTED: tubulin beta chain-like [Maylandia zebra]  
[gi1507574830](#) Mass: 50731 Score: 1001 Matches: 30(11) Sequences: 20(10)  
 PREDICTED: tubulin beta-5 chain-like isoform X1 [Jaculus jaculus]  
[gi1512969925](#) Mass: 56137 Score: 1001 Matches: 30(11) Sequences: 20(10)  
 PREDICTED: tubulin beta-5 chain-like isoform X1 [Heterocephalus glaber]  
[gi1512969927](#) Mass: 50149 Score: 1001 Matches: 30(11) Sequences: 20(10)  
 PREDICTED: tubulin beta-5 chain-like isoform X2 [Heterocephalus glaber]  
[gi1524975670](#) Mass: 50222 Score: 1001 Matches: 30(11) Sequences: 20(10)  
 PREDICTED: tubulin beta-5 chain-like isoform X3 [Mesocricetus auratus]  
[gi1528503228](#) Mass: 49584 Score: 1001 Matches: 30(11) Sequences: 20(10)  
 PREDICTED: tubulin, beta 5 isoform X1 [Danio rerio]  
[gi1529903647](#) Mass: 50484 Score: 1001 Matches: 30(11) Sequences: 20(10)  
 PREDICTED: tubulin beta-5 chain isoform X1 [Bos taurus]  
[gi1530565654](#) Mass: 50502 Score: 1001 Matches: 30(11) Sequences: 20(10)  
 PREDICTED: tubulin beta chain isoform X1 [Chryseomys picta bellisi]  
[gi1532054203](#) Mass: 49923 Score: 1001 Matches: 30(11) Sequences: 20(10)  
 PREDICTED: tubulin beta-5 chain-like isoform X2 [Microtus ochrogaster]  
[gi1532112832](#) Mass: 50494 Score: 1001 Matches: 30(11) Sequences: 20(10)  
 PREDICTED: tubulin beta-5 chain-like isoform X1 [Ictidomys tridecemlineatus]  
[gi1542234953](#) Mass: 235871 Score: 1001 Matches: 30(11) Sequences: 20(10)  
 PREDICTED: mediator of DNA damage checkpoint protein 1-like isoform X1 [Oreochromis niloticus]  
[gi1542244449](#) Mass: 53675 Score: 1001 Matches: 30(11) Sequences: 20(10)  
 PREDICTED: tubulin beta chain-like [Oreochromis niloticus]  
[gi1544429285](#) Mass: 49830 Score: 1001 Matches: 30(11) Sequences: 20(10)  
 PREDICTED: tubulin beta chain isoform X1 [Macaca fascicularis]  
[gi1545030336](#) Mass: 50549 Score: 1001 Matches: 30(11) Sequences: 20(10)  
 PREDICTED: tubulin beta chain isoform X1 [Sus scrofa]  
[gi1545030339](#) Mass: 50383 Score: 1001 Matches: 30(11) Sequences: 20(10)  
 PREDICTED: tubulin beta chain isoform X2 [Sus scrofa]  
[gi1548490819](#) Mass: 49808 Score: 1001 Matches: 30(11) Sequences: 20(10)  
 PREDICTED: tubulin beta-4B chain-like isoform X1 [Pundamilia nyererei]

6. [gi1306891](#) Mass: 83242 Score: 1037 Matches: 25(11) Sequences: 21(10) eSPAI: 0.78  
 90kDa heat shock protein [Homo sapiens]

| Query                | Observed  | Mr (exp.) | Mr (calc) | ppm   | Miss | Score | Expect   | Rank | Unique | Peptide                       |
|----------------------|-----------|-----------|-----------|-------|------|-------|----------|------|--------|-------------------------------|
| <a href="#">250</a>  | 415.2686  | 820.5226  | 820.5221  | 0.41  | 0    | 34    | 0.15     | 1    |        | R-ALLFIR-R                    |
| <a href="#">335</a>  | 432.2182  | 862.4218  | 862.4218  | 0.02  | 0    | 30    | 4.8      | 1    |        | R-SDLQGR-I                    |
| <a href="#">578</a>  | 489.3193  | 984.6240  | 984.6232  | 0.82  | 1    | 25    | 1.8      | 1    |        | R-ALLFIR-R                    |
| <a href="#">993</a>  | 571.2837  | 1140.5528 | 1140.5523 | 0.45  | 0    | 34    | 1.3      | 1    |        | K-LGINKDTR-R                  |
| <a href="#">1035</a> | 576.2828  | 1150.5510 | 1150.5506 | 0.48  | 0    | 36    | 1.2      | 1    |        | K-YIDQELAK-T                  |
| <a href="#">1209</a> | 609.5488  | 1207.6246 | 1207.6237 | 0.72  | 1    | 21    | 22       | 1    |        | R-APFDLFRK-K                  |
| <a href="#">1389</a> | 618.8225  | 1235.6304 | 1235.6299 | 0.48  | 1    | 30    | 0.77     | 1    |        | R-SAPFDLFR-K 1389             |
| <a href="#">1335</a> | 621.8570  | 1241.6994 | 1241.6979 | 1.23  | 0    | 63    | 0.0015   | 1    |        | K-ALLDRELGIK-S                |
| <a href="#">1680</a> | 683.3685  | 1364.7224 | 1364.7221 | 0.23  | 0    | 80    | 2.8e-055 | 1    |        | R-TLIDVTSIGR-K                |
| <a href="#">1742</a> | 704.8522  | 1407.6998 | 1407.6981 | 1.22  | 1    | 21    | 32       | 2    |        | K-ENYIDQELAK-T                |
| <a href="#">1959</a> | 757.3969  | 1512.7792 | 1512.7784 | 0.57  | 0    | 52    | 0.019    | 1    |        | R-GVVSDLSLNLSPK-R             |
| <a href="#">2485</a> | 891.9792  | 1781.9438 | 1781.9434 | 0.81  | 0    | 46    | 0.059    | 1    |        | K-RLDHPSPVETLR-Q              |
| <a href="#">2538</a> | 603.6575  | 1807.8527 | 1807.8509 | -0.10 | 0    | 25    | 9.5      | 1    |        | K-NSQFTGPTLYLAK-E             |
| <a href="#">2614</a> | 924.4027  | 1846.7960 | 1846.7897 | 0.61  | 0    | 68    | 0.0019   | 1    |        | R-NPQDITQRYEYK-S              |
| <a href="#">2888</a> | 672.3547  | 2014.9423 | 2014.9371 | 2.58  | 1    | 66    | 0.0085   | 1    |        | K-VILLKLDQTEYLAK-R            |
| <a href="#">2949</a> | 686.7050  | 2093.9932 | 2093.9945 | -0.66 | 1    | 41    | 0.2      | 1    |        | K-NSQFTGPTLYLAK-E             |
| <a href="#">3021</a> | 731.6520  | 2191.9342 | 2191.9328 | 0.63  | 0    | 47    | 0.019    | 1    |        | R-VETSGGDSFSLSEYR-N           |
| <a href="#">3099</a> | 1187.5970 | 2373.1794 | 2373.1846 | -2.16 | 1    | (32)  | 2.2      | 1    |        | R-GVVSDLSLNLSPK-QGK-I         |
| <a href="#">3100</a> | 792.0690  | 2373.1852 | 2373.1846 | 0.25  | 1    | 57    | 0.0075   | 1    |        | R-GVVSDLSLNLSPK-QGK-I         |
| <a href="#">3110</a> | 1196.0950 | 2390.1754 | 2390.1754 | 0.03  | 1    | 114   | 1.7e-058 | 1    |        | K-STVYITGKSGQVSSAFYR-V        |
| <a href="#">3111</a> | 797.7322  | 2390.1778 | 2390.1754 | 1.01  | 1    | (64)  | 0.0014   | 1    |        | K-STVYITGKSGQVSSAFYR-V        |
| <a href="#">3197</a> | 863.8110  | 2588.4112 | 2588.4095 | 0.65  | 1    | 57    | 0.0021   | 1    |        | R-TLIDVTSIGR-K                |
| <a href="#">3285</a> | 968.7957  | 2903.3653 | 2903.3607 | 1.58  | 1    | 78    | 4.4e-055 | 1    |        | R-LKRLRTPSGSDR-TSLSEYR-N 3190 |

Proteins matching the same set of peptides:

[gi16807647](#) Mass: 84790 Score: 1037 Matches: 25(11) Sequences: 21(10)  
 hypothetical protein [Homo sapiens]  
[gi132082134](#) Mass: 81912 Score: 1037 Matches: 25(11) Sequences: 21(10)  
 heat shock protein 90 beta [Equus caballus]  
[gi120149594](#) Mass: 83212 Score: 1037 Matches: 25(11) Sequences: 21(10)  
 heat shock protein HSP 90-beta isoform a [Homo sapiens]  
[gi139644662](#) Mass: 74744 Score: 1037 Matches: 25(11) Sequences: 21(10)  
 HSP90AB1 protein [Homo sapiens]  
[gi140556608](#) Mass: 83229 Score: 1037 Matches: 25(11) Sequences: 21(10)  
 heat shock protein HSP 90-beta [Mus musculus]  
[gi151859516](#) Mass: 83289 Score: 1037 Matches: 25(11) Sequences: 21(10)

## Supporting Information

Heat shock protein 90kDa alpha (cytosolic), class B member 1 [Rattus norvegicus]  
[q174147026](#) Mass: 83171 Score: 1037 Matches: 25(11) Sequences: 21(10)  
unnamed protein product [Mus musculus]  
[q190075918](#) Mass: 83113 Score: 1037 Matches: 25(11) Sequences: 21(10)  
unnamed protein product [Macaca fascicularis]  
[q191234991](#) Mass: 83230 Score: 1037 Matches: 25(11) Sequences: 21(10)  
84 kDa heat shock protein [Rattus norvegicus]  
[q1126352614](#) Mass: 83185 Score: 1037 Matches: 25(11) Sequences: 21(10)  
heat shock protein HSP 90-beta [Equus caballus]  
[q11394378142](#) Mass: 82119 Score: 1037 Matches: 25(11) Sequences: 21(10)  
unnamed protein product [Homo sapiens]  
[q11394380896](#) Mass: 79145 Score: 1037 Matches: 25(11) Sequences: 21(10)  
unnamed protein product [Homo sapiens]  
[q11397109267](#) Mass: 83186 Score: 1037 Matches: 25(11) Sequences: 21(10)  
heat shock protein HSP 90-beta [Pongo abelii]  
[q11291396292](#) Mass: 83415 Score: 1037 Matches: 25(11) Sequences: 21(10)  
PREDICTED: heat shock 90kDa protein 1, beta [Oryctolagus cuniculus]  
[q11346864428](#) Mass: 83201 Score: 1037 Matches: 25(11) Sequences: 21(10)  
heat shock 90kD protein 1, beta [Sus scrofa]  
[q11355748592](#) Mass: 83136 Score: 1037 Matches: 25(11) Sequences: 21(10)  
hypothetical protein EGM\_13437 [Macaca fascicularis]  
[q11397326725](#) Mass: 82242 Score: 1037 Matches: 25(11) Sequences: 21(10)  
PREDICTED: heat shock cognate protein HSP 90-beta-like isoform 2 [Pan paniscus]  
[q11410859296](#) Mass: 83215 Score: 1037 Matches: 25(11) Sequences: 21(10)  
PREDICTED: heat shock protein HSP 90-beta [Felis catus]  
[q11431822498](#) Mass: 82269 Score: 1037 Matches: 25(11) Sequences: 21(10)  
heat shock protein HSP 90-beta isoform c [Homo sapiens]  
[q11431838325](#) Mass: 84145 Score: 1037 Matches: 25(11) Sequences: 21(10)  
Heat shock protein HSP 90-beta [Pteropus alecto]  
[q11444723038](#) Mass: 89569 Score: 1037 Matches: 25(11) Sequences: 21(10)  
Heat shock protein HSP 90-beta [Tupaia chinensis]  
[q11478499606](#) Mass: 84161 Score: 1037 Matches: 25(11) Sequences: 21(10)  
PREDICTED: heat shock protein HSP 90-beta isoform 1 [Ceratottherium simum simum]  
[q11478499608](#) Mass: 83245 Score: 1037 Matches: 25(11) Sequences: 21(10)  
PREDICTED: heat shock protein HSP 90-beta isoform 2 [Ceratottherium simum simum]  
[q11504157887](#) Mass: 83245 Score: 1037 Matches: 25(11) Sequences: 21(10)  
PREDICTED: heat shock protein HSP 90-beta isoform X1 [Ochotona princeps]  
[q11504157889](#) Mass: 82302 Score: 1037 Matches: 25(11) Sequences: 21(10)  
PREDICTED: heat shock protein HSP 90-beta isoform X2 [Ochotona princeps]  
[q11505791410](#) Mass: 83215 Score: 1037 Matches: 25(11) Sequences: 21(10)  
PREDICTED: heat shock protein HSP 90-beta isoform X1 [Sorex araneus]  
[q11505791413](#) Mass: 82272 Score: 1037 Matches: 25(11) Sequences: 21(10)  
PREDICTED: heat shock protein HSP 90-beta isoform X2 [Sorex araneus]  
[q11507824642](#) Mass: 83243 Score: 1037 Matches: 25(11) Sequences: 21(10)  
PREDICTED: heat shock protein HSP 90-beta isoform X1 [Condylura cristata]  
[q11507824644](#) Mass: 83322 Score: 1037 Matches: 25(11) Sequences: 21(10)  
PREDICTED: heat shock protein HSP 90-beta isoform X2 [Condylura cristata]  
[q11524841111](#) Mass: 83261 Score: 1037 Matches: 25(11) Sequences: 21(10)  
PREDICTED: heat shock protein HSP 90-beta isoform X1 [Mesocricetus auratus]  
[q11524841115](#) Mass: 82318 Score: 1037 Matches: 25(11) Sequences: 21(10)  
PREDICTED: heat shock protein HSP 90-beta isoform X2 [Mesocricetus auratus]  
[q11532033960](#) Mass: 83157 Score: 1037 Matches: 25(11) Sequences: 21(10)  
PREDICTED: heat shock protein HSP 90-beta isoform X1 [Microtus ochrogaster]  
[q11532062638](#) Mass: 83289 Score: 1037 Matches: 25(11) Sequences: 21(10)  
PREDICTED: heat shock protein HSP 90-beta [Ictidomys tridecemlineatus]  
[q11537261579](#) Mass: 80464 Score: 1037 Matches: 25(11) Sequences: 21(10)  
heat shock protein HSP 90-beta-like protein [Cricetulus griseus]  
[q11544427662](#) Mass: 87537 Score: 1037 Matches: 25(11) Sequences: 21(10)  
PREDICTED: uncharacterized LOC101926380 isoform X1 [Macaca fascicularis]  
[q11545519269](#) Mass: 84340 Score: 1037 Matches: 25(11) Sequences: 21(10)  
PREDICTED: heat shock protein HSP 90-beta isoform X2 [Canis lupus familiaris]

Supplemental Figure S8: LC/MS/MS sequencing results from compound 7\_TagII lysate pulldown in HCT-116 cell lysates.



## Supporting Information

### *(MATRIX)* Mascot Search Results *(SCIENCE)*

User :  
Email :  
Search title : JM\_270214\_1\_r.RAW  
MS data file : D:\Data\Sydney\2014\February\28\JM\_270214\_1\_r.RAW  
Database : NCBI nr 26\_10\_13 (33055681 sequences; 11532217697 residues)  
Timestamp : 2 Mar 2014 at 22:57:45 GMT  
Enzyme : Trypsin  
Variable modifications : Acrylamide (C), Carbamidomethyl (C), Oxidation (M)  
Mass values : Monoisotopic  
Protein Mass : Unrestricted  
Peptide Mass Tolerance : ± 4 ppm  
Fragment Mass Tolerance : ± 0.4 Da  
Max Missed Cleavages : 1  
Instrument type : ESI-TRAP  
Number of queries : 2928  
Protein hits :  
[qi|12667788](#) myosin-9 [Homo sapiens]  
[qi|113271](#) RefName: Full-Actin, cytoplasmic 1; AltName: Full-Beta actin  
[qi|530653524](#) PREDICTED: myosin-9-like [Chryseomys picta bellii]  
[qi|5174735](#) tubulin beta-4B chain [Homo sapiens]  
[qi|7106439](#) tubulin beta-5 chain [Mus musculus]  
[qi|16579885](#) 60S ribosomal protein L4 [Homo sapiens]  
[qi|306891](#) **90kDa heat shock protein [Homo sapiens]**  
[qi|7669492](#) glyceraldehyde-3-phosphate dehydrogenase isoform 1 [Homo sapiens]  
[qi|296228277](#) PREDICTED: glyceraldehyde-3-phosphate dehydrogenase [Callithrix jacchus]  
[qi|480318327](#) actin, partial [Thorelliola mahunkai]  
[qi|348506289](#) PREDICTED: heat shock protein HSP 90-alpha-like [Oreochromis niloticus]  
[qi|38648667](#) Fatty acid synthase [Homo sapiens]  
[qi|32488](#) unnamed protein product [Homo sapiens]  
[qi|480318316](#) actin, partial [Thylenula sp. South Africa]  
[qi|1374715](#) ATP synthase beta subunit [Rattus norvegicus]  
[qi|480318469](#) actin, partial [Euryattus sp. Tualapa]  
[qi|4506667](#) 60S acidic ribosomal protein P0 [Homo sapiens]  
[qi|181573](#) cytokeratin 8 [Homo sapiens]  
[qi|426254043](#) PREDICTED: LOW QUALITY PROTEIN: tubulin beta-6 chain [Ovis aries]  
[qi|4503483](#) elongation factor 2 [Homo sapiens]  
[qi|397511428](#) PREDICTED: tubulin alpha-1C chain-like [Pan paniscus]  
[qi|390352752](#) PREDICTED: tubulin beta-4 chain-like isoform 3 [Strongylocentrotus purpuratus]  
[qi|35903](#) ribosomal protein L7 [Homo sapiens]  
[qi|16753227](#) 60S ribosomal protein L6 [Homo sapiens]  
[qi|1827809](#) Chain A, Bovine Mitochondrial F1-ATPase Complexed With Aurovertin B  
[qi|337930](#) scar protein [Homo sapiens]  
[qi|521036680](#) Tubulin alpha-1D chain [Myotis brandtii]  
[qi|432092845](#) Translational activator GCN1 [Myotis davidii]  
[qi|4506607](#) 60S ribosomal protein L18 isoform 1 [Homo sapiens]  
[qi|505846589](#) PREDICTED: tubulin alpha-1B chain isoform X1 [Sorex araneus]  
[qi|390467904](#) PREDICTED: 60S ribosomal protein L4-like [Callithrix jacchus]  
[qi|291389091](#) PREDICTED: mCG18413-like [Oryctolagus cuniculus]  
[qi|27807325](#) myosin-10 [Bos taurus]  
[qi|61543](#) unnamed protein product [Feline sarcoma virus]  
[qi|4574288](#) beta-actin [Tupaia belangeri]  
[qi|4502643](#) T-complex protein 1 subunit zeta isoform a [Homo sapiens]  
[qi|306553](#) ribosomal protein small subunit [Homo sapiens]  
[qi|4506663](#) 60S ribosomal protein L8 [Homo sapiens]  
[qi|100913206](#) ATP-dependent RNA helicase A [Homo sapiens]  
[qi|480318426](#) actin, partial [Cobanus sp. Panama]  
[qi|451889](#) avidin  
[qi|5031857](#) L-lactate dehydrogenase A chain isoform 1 [Homo sapiens]  
[qi|291395669](#) PREDICTED: histone cluster 1, H2bc-like [Oryctolagus cuniculus]  
[qi|31542947](#) 60 kDa heat shock protein, mitochondrial [Homo sapiens]  
[qi|260790260](#) hypothetical protein BRAPFLDRAFT\_126062 [Branchiostoma floridae]  
[qi|23308577](#) D-3-phosphoglycerate dehydrogenase [Homo sapiens]  
[qi|15055539](#) 40S ribosomal protein S2 [Homo sapiens]  
[qi|4557032](#) L-lactate dehydrogenase B chain [Homo sapiens]  
[qi|33438760](#) myosin heavy chain [Homo sapiens]  
[qi|36796](#) t-complex polypeptide 1 [Homo sapiens]  
[qi|7513316](#) ribosomal protein L14 - human  
[qi|337516](#) ribosomal protein s6 [Homo sapiens]  
[qi|344238180](#) Histone H2A type 1 [Cricetulus griseus]



## Supporting Information

[gi14506597](#) 60S ribosomal protein L12 [Homo sapiens]  
[gi134228](#) unnamed protein product [Homo sapiens]  
[gi155982450](#) actin [Leptosphaeria biglobosa 'canadensis' group]  
[gi1531171](#) Caa-19 [Homo sapiens]  
[gi113592053](#) 60S ribosomal protein L10 [Rattus norvegicus]  
[gi1704416](#) elongation factor Tu [Homo sapiens]  
[gi14885375](#) histone H1.2 [Homo sapiens]  
[gi1730522](#) RefName: Full-60S ribosomal protein L13  
[gi129383](#) 89C1 [Homo sapiens]  
[gi145598766](#) 60S ribosomal protein L3-like protein [Chelonia mydas]  
[gi1544482](#) aldehyde dehydrogenase 6 [Homo sapiens]  
[gi14506619](#) 60S ribosomal protein L24 [Homo sapiens]  
[gi1198643](#) ribosomal protein L19 [Mus musculus]  
[gi128917](#) unnamed protein product [Homo sapiens]  
[gi113606056](#) DNA dependent protein kinase catalytic subunit [Homo sapiens]  
[gi1431921648](#) Keratin, type II cytoskeletal 1 [Pteropus alecto]  
[gi152741](#) J1 protein [Mus musculus]  
[gi1550019](#) ribosomal protein L28 [Homo sapiens]  
[gi1392501408](#) beta-tubulin, partial [Teleopsis dalaensis]  
[gi157143](#) ribosomal protein S9 [Rattus norvegicus]  
[gi1375314779](#) keratin 1 [Homo sapiens]  
[gi16755372](#) 40S ribosomal protein S3 [Mus musculus]  
[gi1309319](#) heat shock protein 70 cognate [Mus musculus]  
[gi14506661](#) 60S ribosomal protein L7a [Homo sapiens]  
[gi11415024](#) 60S ribosomal protein L15a [Homo sapiens]  
[gi1292435](#) ribosomal protein L26 [Homo sapiens]  
[gi1189498](#) pyrroline-5-carboxylate reductase [Homo sapiens]  
[gi1431920762](#) 60S ribosomal protein L13a [Pteropus alecto]  
[gi1181402](#) epidermal cytokeratin 2 [Homo sapiens]  
[gi163333543](#) beta-tubulin, partial [Basidiobolus microsporus]  
[gi14005860](#) 60S ribosomal protein L35 [Homo sapiens]  
[gi11321601](#) 6-phosphofructokinase type C isoform 1 [Homo sapiens]  
[gi1404015](#) ribosomal protein L23a, partial [Homo sapiens]  
[gi1537140561](#) Importin subunit beta-1 [Cricetulus griseus]  
[gi14506753](#) ruvB-like 1 [Homo sapiens]  
[gi14506685](#) 40S ribosomal protein S13 [Homo sapiens]  
[gi1132983](#) RefName: Full-60S ribosomal protein L5-A  
[gi1662841](#) heat shock protein 27 [Homo sapiens]  
[gi1514749793](#) PREDICTED: actin-1-like isoform N1 [Setaria italica]  
[gi1247935](#) actinin [Mus musculus]  
[gi11665234](#) actin [Pisum sativum]  
[gi110863945](#) X-ray repair cross-complementing protein 5 [Homo sapiens]  
[gi14506743](#) 40S ribosomal protein S8 [Homo sapiens]  
[gi1124392719](#) beta-actin [Odocoileus virginianus]  
[gi1435475](#) cytokeratin 9 [Homo sapiens]  
[gi1323361175](#) beta-tubulin [Phytophthora sp. 1 EEO-2011]  
[gi18031753](#) heterogeneous nuclear ribonucleoprotein M [Homo sapiens]  
[gi1198578](#) ribosomal protein [Mus musculus]  
[gi1156382552](#) predicted protein [Nematostella vectensis]  
[gi12330818](#) hMps6 [Homo sapiens]  
[gi11263008](#) aldehyde dehydrogenase [Homo sapiens]  
[gi1494066](#) Chain A, Three-Dimensional Structure Of Class PI Glutathione S-Transferase From Human Placenta In Complex With S-Hexylglutathione At 2.8 Angstroms Resolution  
[gi130311](#) cytokeratin 18 (424 AA) [Homo sapiens]  
[gi1284449](#) protein kinase [Sus scrofa]  
[gi1392341350](#) PREDICTED: glyceraldehyde-3-phosphate dehydrogenase-like [Rattus norvegicus]  
[gi131092](#) unnamed protein product [Homo sapiens]  
[gi1187281](#) M4 protein [Homo sapiens]  
[gi1115206](#) RefName: Full-C-1-tetrahydrofolate synthase, cytoplasmic; Short-C1-THF synthase; Includes: RefName: Full-Methylenetetrahydrofolate dehydrogenase; Includes: RefName: I  
[gi1286466](#) heat shock protein 75 [Homo sapiens]  
[gi11002349](#) costomer protein [Homo sapiens]  
[gi1703093](#) serine hydroxymethyltransferase, partial [Homo sapiens]  
[gi11244508](#) assembly protein 50 [Homo sapiens]  
[gi150815](#) unnamed protein product [Mus musculus]  
[gi1755746](#) p8Smem protein [Homo sapiens]  
[gi1162811](#) kappa-casein precursor [Bos taurus]  
[gi14506617](#) 60S ribosomal protein L17 isoform a [Homo sapiens]  
[gi1225632](#) casein alpha1  
[gi1403225](#) p67 [Homo sapiens]  
[gi1414587](#) ribosomal protein L10 [Homo sapiens]  
[gi115146358](#) glyceraldehyde 3-phosphate dehydrogenase [Peprus major]  
[gi14506635](#) 60S ribosomal protein L32 [Homo sapiens]  
[gi1225008742](#) AtpD [Rhizobium sp. MITP02]

## Supporting Information

[gi|468860736](#) heat shock protein 90 [Callana toreuma]  
[gi|1397518](#) ribosomal protein, partial [Homo sapiens]  
[gi|1306975](#) C protein [Homo sapiens]  
[gi|134234](#) laminin-binding protein [Homo sapiens]  
[gi|1619786](#) L21 ribosomal protein [Homo sapiens]  
[gi|15802974](#) thioredoxin-dependent peroxidase, mitochondrial isoform a precursor [Homo sapiens]  
[gi|1445615](#) ribosomal protein L27  
[gi|11911441](#) DAM6 protein [human, testis, Peptide, 319 aa]  
[gi|1136429](#) RecName: Full=Trypsin; Flags: Precursor  
[gi|135175766](#) Heat shock cognate 71 kDa protein [Heterocephalus glaber]  
[gi|128935](#) ATP-citrate (pro-S)-lyase [Homo sapiens]  
[gi|11706000](#) RecName: Full=Coatomer subunit gamma-1; AltName: Full=Gamma-1-coat protein; Short=Gamma-1-COP  
[gi|111622251](#) beta tubulin, partial [Leucocryptos marina]  
[gi|14929561](#) CGI-46 protein [Homo sapiens]  
[gi|1307066](#) isoenzyme-5'-monophosphate dehydrogenase (EC 1.1.1.205) [Homo sapiens]  
[gi|14924760](#) heterogeneous nuclear ribonucleoprotein F [Homo sapiens]  
[gi|12500241](#) RecName: Full=60S ribosomal protein L11  
[gi|186610100](#) POF1 ATP synthase subunit alpha [Synechococcus sp. JA-2-3B'a(2-13)]  
[gi|1399219045](#) unnamed protein product [Babesia microti strain RI]  
[gi|14503841](#) X-ray repair cross-complementing protein 6 [Homo sapiens]  
[gi|152876391](#) Clathrin heavy chain 1 (CLH-17) isoform 5-like protein [Camelus ferus]  
[gi|14506691](#) 40S ribosomal protein S16 [Homo sapiens]  
[gi|15174449](#) histone H1x [Homo sapiens]  
[gi|1443925834](#) dynein heavy chain [Rhizoctonia solani AG-1 IA]  
[gi|17243085](#) KIAA1352 protein [Homo sapiens]  
[gi|1299029](#) pre-mRNA binding K protein, hnRNP K [Xenopus laevis, Peptide, 396 aa]  
[gi|134032](#) unnamed protein product [Homo sapiens]  
[gi|1262391](#) Rig homolog [human, brain, Peptide Partial, 135 aa]  
[gi|1655596](#) ribosomal protein L31 [Homo sapiens]  
[gi|167989044](#) unnamed protein product [Macaca fascicularis]  
[gi|1195350828](#) GM11458 [Drosophila sechellia]  
[gi|1730433](#) RecName: Full=60S ribosomal protein S14  
[gi|15739027](#) KH domain-containing, RNA-binding, signal transduction-associated protein 1 isoform 1 [Homo sapiens]  
[gi|11232079](#) huMCM5 [Homo sapiens]  
[gi|1940536](#) P1 Cdc21 protein [Homo sapiens]  
[gi|12580550](#) dead box, X isoform [Homo sapiens]  
[gi|12914385](#) Chain C, Human Pcsa  
[gi|14506707](#) 40S ribosomal protein S25 [Homo sapiens]  
[gi|17705855](#) estradiol 17-beta-dehydrogenase 12 [Homo sapiens]  
[gi|1228049](#) multifunctional protein CAD [Homo sapiens]  
[gi|1127276](#) RecName: Full=Phosphate carrier protein, mitochondrial; AltName: Full=Phosphate transport protein; Short=PTP; AltName: Full=Solute carrier family 25 member 3; Flags:  
[gi|1541340124](#) tubulin beta-1 chain [Ascaris suum]  
[gi|1433886](#) coproporphyrinogen oxidase [Homo sapiens]  
[gi|15911903](#) hypothetical protein [Homo sapiens]  
[gi|1189754](#) pyruvate dehydrogenase beta subunit [Homo sapiens]  
[gi|1133972](#) RecName: Full=60S ribosomal protein S5; Contains: RecName: Full=40S ribosomal protein S5, N-terminally processed  
[gi|14506901](#) serine/arginine-rich splicing factor 3 [Homo sapiens]  
[gi|13088342](#) ribosomal protein S23 [Homo sapiens]  
[gi|1220618](#) DNA topoisomerase I [Mus musculus]  
[gi|12258465](#) succinyl-CoA synthetase alpha subunit [Sus scrofa]  
[gi|1395828418](#) PREDICTED: thioredoxin-dependent peroxide reductase, mitochondrial [Otolemaur garnettii]  
[gi|11217668](#) arginyl-tRNA synthetase [Homo sapiens]  
[gi|1302682018](#) hypothetical protein SCHODRAP1\_52385 [Schizophyllum commune H4-8]  
[gi|1182009](#) NADP-isocitrate dehydrogenase [Macaca fascicularis]  
[gi|17959733](#) PRCO992 [Homo sapiens]  
[gi|1793843](#) ribosomal protein L29 [Homo sapiens]  
[gi|11304314](#) pyrroline 5-carboxylate synthetase [Homo sapiens]  
[gi|15453832](#) hypoxia up-regulated protein 1 precursor [Homo sapiens]  
[gi|1171492263](#) hypothetical protein [Podospira anserina S nat+]  
[gi|1387100](#) Tum-P1A antigen, partial [Mus musculus]  
[gi|156676330](#) heterochromatin protein 1-binding protein 3 [Homo sapiens]  
[gi|151263](#) p68 RNA helicase [Mus musculus]  
[gi|176257839](#) beta-tubulin [Pterosperma cristatum]  
[gi|1403495](#) glycylamide ribonucleotide synthetase [Mus musculus]  
[gi|112376082](#) hypothetical protein [Trichomonas vaginalis G3]  
[gi|14507353](#) TATA-binding protein-associated factor 2N isoform 2 [Homo sapiens]  
[gi|1336262795](#) hypothetical protein SMC\_06647 [Sordaria macrospora k-hell]  
[gi|14506491](#) replication factor C subunit 4 [Homo sapiens]  
[gi|150380](#) unnamed protein product [Mus musculus]  
[gi|14506703](#) 40S ribosomal protein S24 isoform c [Homo sapiens]  
[gi|1180328](#) core protein II precursor [Homo sapiens]  
[gi|11403050](#) phosphoenolpyruvate carboxykinase (GTP) [Homo sapiens]

## Supporting Information

[qi16174877](#) fatty acid coenzyme A ligase 5 [Homo sapiens]  
[qi181849](#) dynamin [Homo sapiens]  
[qi130130](#) colligin [Homo sapiens]  
[qi120842](#) RecName: Full=Nucleolin; AltName: Full=Protein C23  
[qi19653293](#) tropomyosin 5 [Rattus sp.]  
[qi1178390](#) aldehyde dehydrogenase [Homo sapiens]  
[qi1397606112](#) hypothetical protein THAOC\_20596 [Thalassiosira oceanica]  
[qi17020309](#) unnamed protein product [Homo sapiens]  
[qi167408](#) lysozyme (EC 3.2.1.17) c precursor [validated] - ring-necked pheasant (tentative sequence)  
[qi150321](#) unnamed protein product [Mus musculus]  
[qi12833](#) Alcohol Dehydrogenase II [Kluyveromyces lactis]  
[qi135570](#) unnamed protein product [Homo sapiens]  
[qi131545](#) valyl-tRNA synthetase [Homo sapiens]  
[qi12809420](#) translocase of inner mitochondrial membrane Tim44 precursor [Homo sapiens]  
[qi1444731664](#) 60S ribosomal protein L21 [Tupaia chinensis]  
[qi1499158](#) mitochondrial acetoacetyl-CoA thiolase [Homo sapiens]  
[qi117149828](#) N-alpha-acetyltransferase 15, NatA auxiliary subunit [Homo sapiens]  
[qi1436935](#) protein kinase C receptor [Rattus norvegicus]  
[qi1403456](#) 26S protease (S4) regulatory subunit [Homo sapiens]  
[qi149518](#) N-ethylmaleimide sensitive fusion protein [Cricetulus longicaudatus]  
[qi1376199](#) GTP-specific succinyl-CoA synthetase beta subunit [Homo sapiens]  
[qi1179100](#) asparagine synthetase [Homo sapiens]  
[qi14503377](#) dihydropyrimidinase-related protein 2 isoform 2 [Homo sapiens]  
[qi1515634](#) ubiquinol-cytochrome c reductase core I protein [Homo sapiens]  
[qi114042058](#) unnamed protein product [Homo sapiens]  
[qi1475674486](#) hypothetical protein FOC4\_g10010102 [Fusarium oxysporum f. sp. cubense race 4]  
[qi1183351](#) glycogen phosphorylase type IV, partial [Homo sapiens]  
[qi1493852550](#) hypothetical protein [Dyadocmonas gadel]  
[qi1607793](#) ribosomal protein L9 [Homo sapiens]  
[qi1228542](#) myosin:SUBUNIT-regulatory light chain  
[qi11083257](#) centrosomin B - mouse  
[qi123956266](#) dnaJ homolog subfamily C member 9 [Mus musculus]  
[qi14885399](#) structural maintenance of chromosomes protein 3 [Homo sapiens]  
[qi11552242](#) hRlf beta subunit (p102 protein) [Homo sapiens]  
[qi130851](#) homologue to E.coli DnaJ protein [Homo sapiens]  
[qi1490034148](#) hypothetical protein [Rhodococcus ruber]  
[qi1206889205](#) hypothetical protein THEYE\_A1803 [Thermodesulfovibrio yellowstonii DSM 11347]  
[qi1253577](#) myosin light chain isoform LC17a [swine, aorta smooth muscle, Peptide, 150 aa]  
[qi114196248](#) cytochrome b [Galaxias postvectis]  
[qi1495644485](#) secretin [Pseudomonas sp. M47T1]

### Select Summary Report

Format As  [Help](#)  
 Significance threshold  $p < 0.05$  Max. number of hits   
 Standard scoring  MudPIT scoring  Ions score or expect cut-off  Show sub-sets   
 Show pop-ups  Suppress pop-ups  Require bold red   
 Re-Search  All queries  Unassigned  Below homology threshold  Below identity threshold

1. [qi112667788](#) Mass: 226392 Score: 1791 Matches: 40 (14) Sequences: 40 (14) eMFAI: 0.33  
 myosin-9 [Homo sapiens]

| Query               | Observed | Mr (expt) | Mr (calc) | ppm  | Miss | Score | Expect | Rank | Unique | Peptide        |
|---------------------|----------|-----------|-----------|------|------|-------|--------|------|--------|----------------|
| <a href="#">32</a>  | 343.7212 | 685.4278  | 685.4275  | 0.48 | 0    | 20    | 5.5    | 1    | 1      | R.NGLVLR.I     |
| <a href="#">142</a> | 384.2318 | 766.4490  | 766.4490  | 0.08 | 1    | 30    | 0.72   | 1    | 1      | R.PGRFIR.I     |
| <a href="#">263</a> | 420.2077 | 838.4008  | 838.4007  | 0.18 | 0    | 31    | 3.4    | 4    | 4      | R.NCAAALK.L    |
| <a href="#">389</a> | 452.2612 | 902.5078  | 902.5073  | 0.65 | 0    | 53    | 0.026  | 1    | 1      | K.ASITALEAK.I  |
| <a href="#">481</a> | 480.2617 | 958.5088  | 958.5083  | 0.52 | 1    | 33    | 4.2    | 1    | 1      | K.VNKDDIQK.M   |
| <a href="#">490</a> | 481.2463 | 960.4780  | 960.4777  | 0.34 | 0    | 23    | 31     | 4    | 4      | R.NTIMPPIVY.C  |
| <a href="#">494</a> | 482.2501 | 962.4856  | 962.4855  | 0.15 | 0    | 42    | 0.42   | 2    | 2      | R.QQLTAMK.V    |
| <a href="#">582</a> | 500.2850 | 998.5554  | 998.5549  | 0.52 | 0    | 39    | 0.25   | 1    | 1      | R.GELPFIYVPR.H |
| <a href="#">654</a> | 512.7696 | 1023.5246 | 1023.5237 | 0.96 | 1    | 41    | 0.3    | 1    | 1      | K.ATDRSFVYK.V  |
| <a href="#">699</a> | 525.7806 | 1049.5086 | 1049.5083 | 0.33 | 0    | 42    | 0.26   | 1    | 1      | K.LQREKGTVK.S  |



## Supporting Information

|                      |           |           |           |       |   |     |          |   |                           |
|----------------------|-----------|-----------|-----------|-------|---|-----|----------|---|---------------------------|
| <a href="#">769</a>  | 361.2103  | 1080.6091 | 1080.6080 | 0.98  | 1 | 36  | 0.28     | 1 | R.IGQKVFVR.A              |
| <a href="#">875</a>  | 558.7935  | 1115.5724 | 1115.5710 | 1.31  | 0 | 38  | 1.1      | 1 | R.DLGEELK.T               |
| <a href="#">976</a>  | 385.8929  | 1154.6569 | 1154.6560 | 0.72  | 1 | 35  | 0.53     | 1 | R.RGDLFPVVR.R             |
| <a href="#">1067</a> | 597.3119  | 1192.6092 | 1192.6088 | 0.40  | 0 | 56  | 0.015    | 1 | K.ALELDSGLYR.I            |
| <a href="#">1140</a> | 608.3388  | 1214.6630 | 1214.6619 | 0.99  | 1 | 43  | 0.2      | 2 | R.ASRKILQAK.E             |
| <a href="#">1334</a> | 637.8537  | 1273.6928 | 1273.6918 | 0.84  | 0 | 24  | 13       | 1 | R.YEILTPSIPK.G            |
| <a href="#">1341</a> | 639.3425  | 1276.6704 | 1276.6697 | 0.60  | 1 | 58  | 0.0072   | 1 | K.VKLQKGGTVK.S            |
| <a href="#">1411</a> | 653.3386  | 1304.6626 | 1304.6612 | 1.11  | 0 | 30  | 4.2      | 1 | K.EQDFEALAK.A             |
| <a href="#">1416</a> | 655.3054  | 1308.5962 | 1308.5946 | 1.28  | 1 | 46  | 0.067    | 1 | R.NAQYKQDAK.A             |
| <a href="#">1443</a> | 659.8771  | 1317.7396 | 1317.7405 | -0.63 | 0 | 27  | 3.9      | 1 | K.LDFHLVLDQLR.C           |
| <a href="#">1473</a> | 666.3065  | 1330.5984 | 1330.6000 | -1.19 | 0 | 67  | 0.00038  | 1 | R.QLEAREEAQR.A            |
| <a href="#">1676</a> | 717.3286  | 1432.6426 | 1432.6430 | -0.24 | 1 | 26  | 5.4      | 2 | R.DLQGRDQSEK.K            |
| <a href="#">1839</a> | 508.9406  | 1523.8000 | 1523.7984 | 1.06  | 1 | 24  | 15       | 2 | K.TDLLEPTNYR.F            |
| <a href="#">1904</a> | 524.6229  | 1570.8469 | 1570.8468 | 0.07  | 0 | 40  | 0.31     | 1 | K.VSLLGIVTDSFR.G          |
| <a href="#">1982</a> | 804.3527  | 1606.6908 | 1606.6893 | 0.96  | 0 | 64  | 0.00054  | 1 | R.NTDQASDPHTAAQR.V        |
| <a href="#">1993</a> | 808.0015  | 1613.9884 | 1613.9869 | 0.98  | 1 | 55  | 0.00034  | 1 | R.VISGVLQLGIVTK.E         |
| <a href="#">2057</a> | 824.4058  | 1646.7970 | 1646.8008 | -2.25 | 0 | 60  | 0.0042   | 1 | R.IMQIFEEQMLLR.V          |
| <a href="#">2085</a> | 831.9045  | 1661.7944 | 1661.7930 | 0.88  | 1 | 53  | 0.019    | 1 | R.ALEEARQKALR.L           |
| <a href="#">2185</a> | 863.9784  | 1725.9422 | 1725.9413 | 0.53  | 0 | 57  | 0.0045   | 1 | R.QLLQANPILEAFGNAR.T      |
| <a href="#">2189</a> | 865.4404  | 1728.8662 | 1728.8642 | 1.19  | 1 | 21  | 35       | 2 | K.QTLENERGELAEVK.V        |
| <a href="#">2209</a> | 872.4297  | 1742.8448 | 1742.8436 | 0.69  | 0 | 45  | 0.11     | 1 | K.NLPIYSEIIVMTR.G         |
| <a href="#">2314</a> | 908.4581  | 1814.9016 | 1814.9010 | 0.37  | 1 | 56  | 0.0091   | 1 | K.IAQLEQLDNETKR.Q         |
| <a href="#">2385</a> | 935.4867  | 1868.9588 | 1868.9592 | -0.17 | 0 | 87  | 9.8e-006 | 1 | K.ANLQIDQINTDMLR.S        |
| <a href="#">2487</a> | 650.6696  | 1948.9870 | 1948.9854 | 0.80  | 0 | 24  | 18       | 1 | R.LQQLDLDLVDLHQR.Q        |
| <a href="#">2532</a> | 666.0080  | 1995.0022 | 1995.0021 | 0.04  | 1 | 49  | 0.06     | 1 | K.HSQAVELAEQLQTKR.V       |
| <a href="#">2571</a> | 1017.5320 | 2033.0494 | 2033.0503 | -0.43 | 0 | 79  | 4.5e-005 | 1 | R.IIGLDQVAKSETALPGAK.T    |
| <a href="#">2613</a> | 1040.9790 | 2079.9434 | 2079.9452 | -0.85 | 0 | 102 | 1.8e-007 | 1 | K.SREAHMQLQELAAAR.A       |
| <a href="#">2620</a> | 696.9991  | 2087.9755 | 2087.9719 | 1.71  | 1 | 37  | 0.6      | 1 | R.QAQKREELAEIANSQK.G      |
| <a href="#">2846</a> | 905.1225  | 2712.3457 | 2712.3453 | 0.13  | 1 | 65  | 0.0012   | 1 | R.IAQLEELKEEQNTFLINDRLK.K |
| <a href="#">2854</a> | 917.1149  | 2748.3229 | 2748.3202 | 0.98  | 1 | 37  | 0.71     | 1 | K.DFSALSQLQDTQLLQENRQK.L  |

**Proteins matching the same set of peptides:**

[gi|530420110](#) Mass: 229036 Score: 1791 Matches: 40(14) Sequences: 40(14)  
 PREDICTED: myosin-9 isoform X1 [Homo sapiens]

2. [gi|113271](#) Mass: 41821 Score: 1243 Matches: 34(15) Sequences: 23(12) eMFI: 1.90  
 RecName: Full-Actin, cytoplasmic 1; AltName: Full-Beta actin

| Query                | Observed | Mr(expt)  | Mr(calc)  | ppm   | Miss | Score | Expect   | Rank | Unique | Peptide                            |
|----------------------|----------|-----------|-----------|-------|------|-------|----------|------|--------|------------------------------------|
| <a href="#">424</a>  | 462.2875 | 922.5604  | 922.5600  | 0.52  | 1    | 39    | 0.16     | 1    |        | K.IIAPPERK.Y                       |
| <a href="#">531</a>  | 488.7278 | 975.4410  | 975.4410  | 0.04  | 0    | 81    | 1.9e-005 | 1    |        | K.AGFAGDDAPR.A <a href="#">532</a> |
| <a href="#">621</a>  | 507.7448 | 1013.4750 | 1013.4739 | 1.10  | 0    | 23    | 12       | 1    |        | R.DLTDYIAK.I                       |
| <a href="#">683</a>  | 518.8296 | 1035.6446 | 1035.6440 | 0.60  | 1    | 33    | 0.23     | 1    |        | K.IKIIAPPER.K                      |
| <a href="#">912</a>  | 566.7676 | 1131.5206 | 1131.5197 | 0.88  | 0    | 62    | 0.0015   | 1    |        | R.GYSFTTIAER.E                     |
| <a href="#">991</a>  | 581.3123 | 1160.6100 | 1160.6111 | -0.89 | 0    | 29    | 3.8      | 1    |        | K.EITALAPSTMK.I                    |
| <a href="#">1039</a> | 594.2869 | 1186.5592 | 1186.5587 | 0.45  | 0    | (36)  | 0.66     | 1    |        | R.HQGVVIVSQK.R                     |
| <a href="#">1077</a> | 599.7651 | 1197.5156 | 1197.5150 | 0.58  | 0    | 66    | 0.00049  | 1    |        | K.DSYVDEAQSK.R                     |
| <a href="#">1080</a> | 599.8567 | 1197.6988 | 1197.6982 | 0.52  | 0    | 69    | 0.00023  | 1    |        | R.AVFPDIVGRP.H                     |
| <a href="#">1096</a> | 602.2843 | 1202.5540 | 1202.5536 | 0.34  | 0    | 49    | 0.027    | 1    |        | R.HQGVVIVSQK.D                     |
| <a href="#">1514</a> | 452.2125 | 1353.6157 | 1353.6161 | -0.29 | 1    | (37)  | 0.65     | 1    |        | K.DSYVDEAQSKR.G                    |
| <a href="#">1515</a> | 677.8158 | 1353.6170 | 1353.6161 | 0.73  | 1    | 75    | 0.00011  | 1    |        | K.DSYVDEAQSKR.G                    |
| <a href="#">1645</a> | 709.9006 | 1417.7866 | 1417.7850 | 1.15  | 1    | 34    | 0.76     | 1    |        | K.EITALAPSTMK.I                    |
| <a href="#">1829</a> | 758.8552 | 1515.6958 | 1515.6954 | 0.31  | 0    | 32    | 1.7      | 1    |        | K.QYDESGPSIVMR.K                   |
| <a href="#">1891</a> | 782.9072 | 1563.7998 | 1563.8000 | -0.11 | 1    | 51    | 0.03     | 1    |        | R.MQKEITALAPSTMK.I                 |
| <a href="#">1892</a> | 782.9077 | 1563.8008 | 1563.8000 | 0.53  | 1    | (35)  | 1.1      | 1    |        | R.MQKEITALAPSTMK.I                 |
| <a href="#">1893</a> | 522.2745 | 1563.8017 | 1563.8000 | 1.06  | 1    | (22)  | 28       | 5    |        | R.MQKEITALAPSTMK.I                 |
| <a href="#">1919</a> | 527.6058 | 1579.7956 | 1579.7949 | 0.40  | 1    | (24)  | 14       | 1    |        | R.MQKEITALAPSTMK.I                 |
| <a href="#">1920</a> | 790.9056 | 1579.7966 | 1579.7949 | 1.08  | 1    | (26)  | 11       | 1    |        | R.MQKEITALAPSTMK.I                 |
| <a href="#">2018</a> | 815.4158 | 1628.8170 | 1628.8158 | 0.75  | 1    | 34    | 1.6      | 1    |        | R.GYSFTTIAEREIVR.D                 |

## Supporting Information

|                      |           |           |           |      |   |      |          |   |                                                              |
|----------------------|-----------|-----------|-----------|------|---|------|----------|---|--------------------------------------------------------------|
| <a href="#">2039</a> | 820.4219  | 1638.8292 | 1638.8287 | 0.34 | 1 | {40} | 0.31     | 1 | R.LDLAGSDLYTIK.I                                             |
| <a href="#">2040</a> | 547.2837  | 1638.8293 | 1638.8287 | 0.36 | 1 | 41   | 0.29     | 1 | R.LDLAGSDLYTIK.I                                             |
| <a href="#">2277</a> | 895.9503  | 1789.8860 | 1789.8846 | 0.79 | 0 | 87   | 8.5e-006 | 1 | K.SYELDQVITIGNER.F <a href="#">2276</a> <a href="#">2278</a> |
| <a href="#">2494</a> | 652.0266  | 1953.0580 | 1953.0571 | 0.45 | 0 | 39   | 0.29     | 1 | R.VAKKSPVLLTEASLNR.A                                         |
| <a href="#">2625</a> | 1047.5360 | 2093.0574 | 2093.0542 | 1.57 | 1 | 41   | 0.33     | 1 | K.SYELDQVITIGNER.F.C                                         |
| <a href="#">2689</a> | 1116.0370 | 2230.0594 | 2230.0576 | 0.83 | 0 | 99   | 4.8e-007 | 1 | K.DLYANTVLSGOTTTFPIADR.M                                     |
| <a href="#">2741</a> | 596.5221  | 2382.0593 | 2382.0580 | 0.53 | 1 | 29   | 2.5      | 1 | R.HQGVVYVQKRDSTVGEAQR.K                                      |
| <a href="#">2811</a> | 1283.5880 | 2565.1614 | 2565.1614 | 0.00 | 0 | 101  | 2e-007   | 2 | K.LTVLQVFEQKATAASSSLEK.S                                     |
| <a href="#">2812</a> | 856.0617  | 2565.1633 | 2565.1614 | 0.71 | 0 | (59) | 0.0032   | 1 | K.LTVLQVFEQKATAASSSLEK.S                                     |
| <a href="#">2833</a> | 878.7570  | 2633.2492 | 2633.2465 | 1.00 | 1 | 70   | 0.00038  | 1 | K.DLYANTVLSGOTTTFPIADRQK.K                                   |
| <a href="#">2904</a> | 1067.2080 | 3198.6022 | 3198.6020 | 0.06 | 0 | 58   | 0.0052   | 1 | R.TTGVMSGDVHTVPIETALMILR.L                                   |

### Proteins matching the same set of peptides:

|                                                                                                                                                                             |             |             |                 |                   |  |
|-----------------------------------------------------------------------------------------------------------------------------------------------------------------------------|-------------|-------------|-----------------|-------------------|--|
| <a href="#">gi 809561</a>                                                                                                                                                   | Mass: 40992 | Score: 1243 | Matches: 34(15) | Sequences: 23(12) |  |
| gamma-actin [Mus musculus]                                                                                                                                                  |             |             |                 |                   |  |
| <a href="#">gi 4501885</a>                                                                                                                                                  | Mass: 41710 | Score: 1243 | Matches: 34(15) | Sequences: 23(12) |  |
| actin, cytoplasmic 1 [Homo sapiens]                                                                                                                                         |             |             |                 |                   |  |
| <a href="#">gi 4501887</a>                                                                                                                                                  | Mass: 41766 | Score: 1243 | Matches: 34(15) | Sequences: 23(12) |  |
| actin, cytoplasmic 2 [Homo sapiens]                                                                                                                                         |             |             |                 |                   |  |
| <a href="#">gi 14250401</a>                                                                                                                                                 | Mass: 40978 | Score: 1243 | Matches: 34(15) | Sequences: 23(12) |  |
| actin, beta, partial [Homo sapiens]                                                                                                                                         |             |             |                 |                   |  |
| <a href="#">gi 15277503</a>                                                                                                                                                 | Mass: 40194 | Score: 1243 | Matches: 34(15) | Sequences: 23(12) |  |
| ACTB protein, partial [Homo sapiens]                                                                                                                                        |             |             |                 |                   |  |
| <a href="#">gi 16924319</a>                                                                                                                                                 | Mass: 40477 | Score: 1243 | Matches: 34(15) | Sequences: 23(12) |  |
| Unknown protein for IMAGE:3538275, partial [Homo sapiens]                                                                                                                   |             |             |                 |                   |  |
| <a href="#">gi 33415846</a>                                                                                                                                                 | Mass: 41754 | Score: 1243 | Matches: 34(15) | Sequences: 23(12) |  |
| cytoplasmic actin type 4 [Pelophylax leasonae]                                                                                                                              |             |             |                 |                   |  |
| <a href="#">gi 37688410</a>                                                                                                                                                 | Mass: 41460 | Score: 1243 | Matches: 34(15) | Sequences: 23(12) |  |
| beta-actin [Passer domesticus]                                                                                                                                              |             |             |                 |                   |  |
| <a href="#">gi 45269029</a>                                                                                                                                                 | Mass: 44763 | Score: 1243 | Matches: 34(15) | Sequences: 23(12) |  |
| cytoskeletal beta actin, partial [Sus scrofa]                                                                                                                               |             |             |                 |                   |  |
| <a href="#">gi 45361511</a>                                                                                                                                                 | Mass: 41738 | Score: 1243 | Matches: 34(15) | Sequences: 23(12) |  |
| actin, cytoplasmic 2 [Xenopus (Silurana) tropicalis]                                                                                                                        |             |             |                 |                   |  |
| <a href="#">gi 47498068</a>                                                                                                                                                 | Mass: 41726 | Score: 1243 | Matches: 34(15) | Sequences: 23(12) |  |
| actin, cytoplasmic 1 [Xenopus (Silurana) tropicalis]                                                                                                                        |             |             |                 |                   |  |
| <a href="#">gi 54696726</a>                                                                                                                                                 | Mass: 41823 | Score: 1243 | Matches: 34(15) | Sequences: 23(12) |  |
| actin, beta [synthetic construct]                                                                                                                                           |             |             |                 |                   |  |
| <a href="#">gi 56119084</a>                                                                                                                                                 | Mass: 41809 | Score: 1243 | Matches: 34(15) | Sequences: 23(12) |  |
| actin, cytoplasmic type 5 [Gallus gallus]                                                                                                                                   |             |             |                 |                   |  |
| <a href="#">gi 60389477</a>                                                                                                                                                 | Mass: 41775 | Score: 1243 | Matches: 34(15) | Sequences: 23(12) |  |
| RecName: Full-Actin, cytoplasmic 1; AltName: Full-Beta-actin; Contains: RecName: Full-Actin, cytoplasmic 1, N-terminally processed                                          |             |             |                 |                   |  |
| <a href="#">gi 60653037</a>                                                                                                                                                 | Mass: 41879 | Score: 1243 | Matches: 34(15) | Sequences: 23(12) |  |
| actin gamma 1 [synthetic construct]                                                                                                                                         |             |             |                 |                   |  |
| <a href="#">gi 62897489</a>                                                                                                                                                 | Mass: 41696 | Score: 1243 | Matches: 34(15) | Sequences: 23(12) |  |
| beta actin variant [Homo sapiens]                                                                                                                                           |             |             |                 |                   |  |
| <a href="#">gi 62897671</a>                                                                                                                                                 | Mass: 41694 | Score: 1243 | Matches: 34(15) | Sequences: 23(12) |  |
| beta actin variant [Homo sapiens]                                                                                                                                           |             |             |                 |                   |  |
| <a href="#">gi 66735458</a>                                                                                                                                                 | Mass: 41738 | Score: 1243 | Matches: 34(15) | Sequences: 23(12) |  |
| beta-actin [Phascolarctos cinereus]                                                                                                                                         |             |             |                 |                   |  |
| <a href="#">gi 74191564</a>                                                                                                                                                 | Mass: 41724 | Score: 1243 | Matches: 34(15) | Sequences: 23(12) |  |
| unnamed protein product [Mus musculus]                                                                                                                                      |             |             |                 |                   |  |
| <a href="#">gi 74191566</a>                                                                                                                                                 | Mass: 41784 | Score: 1243 | Matches: 34(15) | Sequences: 23(12) |  |
| unnamed protein product [Mus musculus]                                                                                                                                      |             |             |                 |                   |  |
| <a href="#">gi 74213524</a>                                                                                                                                                 | Mass: 41724 | Score: 1243 | Matches: 34(15) | Sequences: 23(12) |  |
| unnamed protein product [Mus musculus]                                                                                                                                      |             |             |                 |                   |  |
| <a href="#">gi 82195535</a>                                                                                                                                                 | Mass: 41752 | Score: 1243 | Matches: 34(15) | Sequences: 23(12) |  |
| RecName: Full-Actin, cytoplasmic 2; AltName: Full-Cytoplasmic actin type 5; AltName: Full-Gamma-actin; Contains: RecName: Full-Actin, cytoplasmic 2, N-terminally processed |             |             |                 |                   |  |



## Supporting Information

[gi1444727734](#) Mass: 47646 Score: 1243 Matches: 34 (15) Sequences: 23 (12)  
Actin, cytoplasmic 2 [Tupaia chinensis]  
[gi1444729505](#) Mass: 41627 Score: 1243 Matches: 34 (15) Sequences: 23 (12)  
Actin, cytoplasmic 1 [Tupaia chinensis]  
[gi1469566230](#) Mass: 40619 Score: 1243 Matches: 34 (15) Sequences: 23 (12)  
beta actin, partial [Microtus levis]  
[gi1471367241](#) Mass: 41752 Score: 1243 Matches: 34 (15) Sequences: 23 (12)  
PREDICTED: actin, cytoplasmic 2 [Trichechus manatus latirostris]  
[gi1471393426](#) Mass: 41708 Score: 1243 Matches: 34 (15) Sequences: 23 (12)  
PREDICTED: actin, cytoplasmic 1 isoform 1 [Trichechus manatus latirostris]  
[gi1478533584](#) Mass: 41662 Score: 1243 Matches: 34 (15) Sequences: 23 (12)  
PREDICTED: actin, cytoplasmic 1 isoform 1 [Ceratotherium simum simum]  
[gi1514451566](#) Mass: 52184 Score: 1243 Matches: 34 (15) Sequences: 23 (12)  
PREDICTED: actin, cytoplasmic 2 isoform X2 [Cavia porcellus]  
[gi1530578213](#) Mass: 41809 Score: 1243 Matches: 34 (15) Sequences: 23 (12)  
PREDICTED: actin, cytoplasmic type 5-like [Chrysemys picta bellii]  
[gi1543358186](#) Mass: 42975 Score: 1243 Matches: 34 (15) Sequences: 23 (12)  
PREDICTED: actin, cytoplasmic 1 isoform X1 [Pseudopodoces humilis]  
[gi1543375035](#) Mass: 41736 Score: 1243 Matches: 34 (15) Sequences: 23 (12)  
PREDICTED: actin, cytoplasmic 2 [Pseudopodoces humilis]  
[gi1543726898](#) Mass: 41706 Score: 1243 Matches: 34 (15) Sequences: 23 (12)  
PREDICTED: actin, cytoplasmic 1 [Columba livia]  
[gi1545500782](#) Mass: 44840 Score: 1243 Matches: 34 (15) Sequences: 23 (12)  
PREDICTED: actin, cytoplasmic 1 isoform X1 [Canis lupus familiaris]  
[gi1545500784](#) Mass: 42491 Score: 1243 Matches: 34 (15) Sequences: 23 (12)  
PREDICTED: actin, cytoplasmic 1 isoform X2 [Canis lupus familiaris]  
[gi1390479776](#) Mass: 132241 Score: 1233 Matches: 34 (15) Sequences: 23 (12)  
PREDICTED: uncharacterized protein LOC100409006 isoform 1 [Callithrix jacchus]

3. [gi1530653524](#) Mass: 226754 Score: 983 Matches: 25 (6) Sequences: 25 (6) **enPII**: 0.15  
PREDICTED: myosin-9-like [Chrysemys picta bellii]

| Query                | Observed | Mr (expt) | Mr (calc) | ppm   | Miss | Score | Expect  | Rank | Unique | Peptide                 |
|----------------------|----------|-----------|-----------|-------|------|-------|---------|------|--------|-------------------------|
| <a href="#">142</a>  | 384.2318 | 766.4490  | 766.4490  | 0.08  | 1    | 30    | 0.72    | 1    |        | R.FGEFIR.I              |
| <a href="#">263</a>  | 420.2077 | 838.4008  | 838.4007  | 0.18  | 0    | 31    | 3.4     | 4    |        | R.NCAAYLK.L             |
| <a href="#">389</a>  | 452.2612 | 902.5078  | 902.5073  | 0.65  | 0    | 53    | 0.026   | 1    |        | K.ASITALEAK.I           |
| <a href="#">490</a>  | 481.2463 | 960.4780  | 960.4777  | 0.34  | 0    | 23    | 31      | 4    |        | R.NTFNPFVPR.C           |
| <a href="#">494</a>  | 482.2501 | 962.4856  | 962.4855  | 0.15  | 0    | 42    | 0.42    | 2    |        | R.QQQLTAK.V             |
| <a href="#">582</a>  | 500.2850 | 998.5554  | 998.5549  | 0.52  | 0    | 39    | 0.25    | 1    |        | R.GDLFPVVPVPR.R         |
| <a href="#">654</a>  | 512.7696 | 1023.5246 | 1023.5237 | 0.96  | 1    | 41    | 0.3     | 1    |        | K.ATDRSPVEK.V           |
| <a href="#">699</a>  | 525.7606 | 1049.5066 | 1049.5063 | 0.34  | 0    | 30    | 3.5     | 4    |        | K.LQENSAVK.S            |
| <a href="#">769</a>  | 361.2103 | 1080.6091 | 1080.6080 | 0.98  | 1    | 36    | 0.28    | 1    |        | R.IGQSKVFFR.A           |
| <a href="#">875</a>  | 558.7935 | 1115.5724 | 1115.5710 | 1.31  | 0    | 38    | 1.1     | 1    |        | R.DLGELEALK.T           |
| <a href="#">976</a>  | 385.8929 | 1154.6569 | 1154.6560 | 0.72  | 1    | 35    | 0.53    | 1    |        | R.SGDLFPVVPVPR.R        |
| <a href="#">1097</a> | 602.9229 | 1202.6312 | 1202.6295 | 1.45  | 0    | 40    | 0.49    | 1    |        | K.ALELDPLVYR.I          |
| <a href="#">1334</a> | 637.8537 | 1273.6928 | 1273.6918 | 0.84  | 0    | 24    | 13      | 1    |        | R.YEILTPNSIPK.G         |
| <a href="#">1411</a> | 653.3386 | 1304.6626 | 1304.6612 | 1.11  | 0    | 30    | 4.2     | 1    |        | K.SQADFAIKALAK.A        |
| <a href="#">1443</a> | 659.8771 | 1317.7396 | 1317.7405 | -0.63 | 0    | 27    | 3.9     | 1    |        | K.LDPHVLVLDQLR.C        |
| <a href="#">1473</a> | 666.3065 | 1330.5984 | 1330.6000 | -1.19 | 0    | 67    | 0.00038 | 1    |        | R.GLEAEEREAQR.A         |
| <a href="#">1839</a> | 508.9406 | 1523.8000 | 1523.7984 | 1.06  | 1    | 24    | 15      | 2    |        | K.TDLLLEFPYNYR.F        |
| <a href="#">1904</a> | 524.6229 | 1570.8469 | 1570.8468 | 0.07  | 0    | 40    | 0.31    | 1    |        | K.VSHLLGINVTDPTK.G      |
| <a href="#">1982</a> | 804.3527 | 1606.6908 | 1606.6893 | 0.96  | 0    | 64    | 0.00054 | 1    |        | R.NTDQASMPNTAAQK.V      |
| <a href="#">1993</a> | 808.0015 | 1613.9884 | 1613.9869 | 0.98  | 1    | 55    | 0.00034 | 1    |        | R.VISGVVLQGNIVPKK.E     |
| <a href="#">2085</a> | 831.9045 | 1661.7944 | 1661.7930 | 0.88  | 1    | 53    | 0.019   | 1    |        | R.ALEAAMEQKALER.L       |
| <a href="#">2185</a> | 863.9784 | 1725.9422 | 1725.9413 | 0.53  | 0    | 57    | 0.0045  | 1    |        | R.QLLQANPILSAPGNK.T     |
| <a href="#">2209</a> | 872.4297 | 1742.8448 | 1742.8436 | 0.69  | 0    | 45    | 0.11    | 1    |        | K.NLPIYSEIVEMVK.G       |
| <a href="#">2487</a> | 650.6696 | 1948.9870 | 1948.9854 | 0.80  | 0    | 24    | 18      | 1    |        | R.LQQELDDLVLDLHQK.Q     |
| <a href="#">2620</a> | 696.9991 | 2087.9755 | 2087.9719 | 1.71  | 1    | 37    | 0.6     | 1    |        | R.QAQQERDELADRIANSSGK.G |

## Supporting Information

4. [gi15174735](#) Mass: 49799 Score: 940 Matches: 25(9) Sequences: 17(9) eMFAI: 1.16  
 tubulin beta-4B chain [Homo sapiens]

| Query                | Observed  | Mr(expt)  | Mr(calc)  | ppm   | Miss | Score | Expect   | Rank | Unique | Peptide                                               |
|----------------------|-----------|-----------|-----------|-------|------|-------|----------|------|--------|-------------------------------------------------------|
| <a href="#">665</a>  | 514.7631  | 1027.5116 | 1027.5121 | -0.41 | 0    | 42    | 0.17     | 1    |        | K.TAVCDIPFR.G <a href="#">664</a> <a href="#">666</a> |
| <a href="#">684</a>  | 520.3006  | 1038.5866 | 1038.5862 | 0.42  | 0    | 63    | 0.00061  | 1    |        | R.YLTVAAVFR.G                                         |
| <a href="#">942</a>  | 572.3214  | 1142.6282 | 1142.6270 | 1.07  | 0    | (36)  | 1.2      | 1    |        | K.LAVSDVFFPR.L                                        |
| <a href="#">988</a>  | 580.3186  | 1158.6226 | 1158.6219 | 0.60  | 0    | 62    | 0.0031   | 1    |        | K.LAVSDVFFPR.L                                        |
| <a href="#">1265</a> | 626.8622  | 1251.7098 | 1251.7088 | 0.85  | 1    | 25    | 3.7      | 1    |        | R.YLTVAAVFRGR.N                                       |
| <a href="#">1467</a> | 664.8286  | 1327.6426 | 1327.6408 | 1.39  | 0    | 66    | 0.00073  | 1    |        | R.INVTYKATGQK.Y                                       |
| <a href="#">1734</a> | 731.8458  | 1461.6770 | 1461.6769 | 0.07  | 0    | 71    | 0.00021  | 1    |        | K.EVDSQGLNVQNK.N                                      |
| <a href="#">1997</a> | 809.4114  | 1616.8082 | 1616.8080 | 0.16  | 0    | 41    | 0.34     | 1    |        | R.AVLVDELEPGTSDSVR.S                                  |
| <a href="#">2000</a> | 540.9503  | 1619.8291 | 1619.8283 | 0.50  | 0    | (28)  | 7.8      | 1    |        | R.LSFFPDGFAPLTSR.G                                    |
| <a href="#">2001</a> | 810.9221  | 1619.8296 | 1619.8283 | 0.86  | 0    | 38    | 0.65     | 1    |        | R.LSFFPDGFAPLTSR.G                                    |
| <a href="#">2029</a> | 546.2820  | 1635.8242 | 1635.8232 | 0.61  | 0    | (34)  | 2.2      | 1    |        | R.LSFFPDGFAPLTSR.G                                    |
| <a href="#">2030</a> | 818.9205  | 1635.8264 | 1635.8232 | 2.00  | 0    | (29)  | 5.3      | 1    |        | R.LSFFPDGFAPLTSR.G                                    |
| <a href="#">2133</a> | 846.4379  | 1690.8612 | 1690.8600 | 0.74  | 0    | 37    | 0.84     | 1    |        | R.ALTVFELTQQGDAK.N                                    |
| <a href="#">2144</a> | 848.9205  | 1695.8264 | 1695.8257 | 0.47  | 0    | 46    | 0.12     | 1    |        | K.RSSTFVEMIPGK.T                                      |
| <a href="#">2395</a> | 937.4710  | 1872.9274 | 1872.9291 | -0.90 | 0    | 73    | 0.00018  | 3    |        | K.MSATFIGNSTAIQELFK.R                                 |
| <a href="#">2500</a> | 653.6655  | 1957.9747 | 1957.9745 | 0.07  | 0    | (33)  | 2.2      | 1    |        | K.GHYTEGAEIVDSVLDVVR.K                                |
| <a href="#">2501</a> | 979.9952  | 1957.9758 | 1957.9745 | 0.67  | 0    | 102   | 3e-007   | 1    |        | K.GHYTEGAEIVDSVLDVVR.K                                |
| <a href="#">2513</a> | 657.9659  | 1970.8759 | 1970.8747 | 0.58  | 1    | 54    | 0.0079   | 1    |        | R.MSDFVDEQMLNVQNK.N                                   |
| <a href="#">2551</a> | 672.0196  | 2013.0370 | 2013.0353 | 0.82  | 1    | (23)  | 16       | 5    |        | K.MSATFIGNSTAIQELFK.I                                 |
| <a href="#">2566</a> | 1015.5220 | 2029.0294 | 2029.0302 | -0.39 | 1    | 91    | 2.9e-006 | 1    |        | K.MSATFIGNSTAIQELFK.I                                 |
| <a href="#">2617</a> | 696.3635  | 2086.0687 | 2086.0695 | -0.39 | 1    | 33    | 1.9      | 1    |        | K.GHYTEGAEIVDSVLDVVR.K                                |
| <a href="#">2859</a> | 929.4256  | 2785.2550 | 2785.2543 | 0.23  | 1    | 22    | 13       | 3    |        | R.ALTVFELTQQGDAK <b>MSAA</b> CDPR.H                   |
| <a href="#">2912</a> | 1109.8470 | 3326.5192 | 3326.5218 | -0.78 | 0    | 75    | 6.4e-005 | 1    |        | K.EAESCDLQGFQLTSLGGTGG <b>SM</b> DTLLIK.I             |

Proteins matching the same set of peptides:

|                                                                                 |              |            |                |                  |
|---------------------------------------------------------------------------------|--------------|------------|----------------|------------------|
| <a href="#">gi13542680</a>                                                      | Mass: 49783  | Score: 940 | Matches: 25(9) | Sequences: 17(9) |
| Tubulin, beta 2C [Mus musculus]                                                 |              |            |                |                  |
| <a href="#">gi120809886</a>                                                     | Mass: 49776  | Score: 940 | Matches: 25(9) | Sequences: 17(9) |
| Tubulin, beta 2C [Homo sapiens]                                                 |              |            |                |                  |
| <a href="#">gi123958133</a>                                                     | Mass: 49808  | Score: 940 | Matches: 25(9) | Sequences: 17(9) |
| Tubulin, beta 2C [Homo sapiens]                                                 |              |            |                |                  |
| <a href="#">gi140018568</a>                                                     | Mass: 49769  | Score: 940 | Matches: 25(9) | Sequences: 17(9) |
| tubulin beta-4B chain [Rattus norvegicus]                                       |              |            |                |                  |
| <a href="#">gi118404276</a>                                                     | Mass: 49800  | Score: 940 | Matches: 25(9) | Sequences: 17(9) |
| tubulin, beta 4B class IVb [Xenopus (Silurana) tropicalis]                      |              |            |                |                  |
| <a href="#">gi119608775</a>                                                     | Mass: 48794  | Score: 940 | Matches: 25(9) | Sequences: 17(9) |
| tubulin, beta 2C, isoform CRA_b [Homo sapiens]                                  |              |            |                |                  |
| <a href="#">gi148222316</a>                                                     | Mass: 49777  | Score: 940 | Matches: 25(9) | Sequences: 17(9) |
| uncharacterized protein LOC379202 [Xenopus laevis]                              |              |            |                |                  |
| <a href="#">gi1153792017</a>                                                    | Mass: 49829  | Score: 940 | Matches: 25(9) | Sequences: 17(9) |
| tubulin beta-3 chain [Gallus gallus]                                            |              |            |                |                  |
| <a href="#">gi1327290154</a>                                                    | Mass: 49771  | Score: 940 | Matches: 25(9) | Sequences: 17(9) |
| PREDICTED: tubulin beta-2C chain-like [Anolis carolinensis]                     |              |            |                |                  |
| <a href="#">gi1346644707</a>                                                    | Mass: 49716  | Score: 940 | Matches: 25(9) | Sequences: 17(9) |
| tubulin beta-2C chain [Cricetulus griseus]                                      |              |            |                |                  |
| <a href="#">gi1395844458</a>                                                    | Mass: 116943 | Score: 940 | Matches: 25(9) | Sequences: 17(9) |
| PREDICTED: sodium-dependent phosphate transport protein 2C [Otolemur garnettii] |              |            |                |                  |
| <a href="#">gi1403301550</a>                                                    | Mass: 50403  | Score: 940 | Matches: 25(9) | Sequences: 17(9) |
| PREDICTED: tubulin beta-4B chain [Saimiri boliviensis boliviensis]              |              |            |                |                  |
| <a href="#">gi1426363732</a>                                                    | Mass: 48510  | Score: 940 | Matches: 25(9) | Sequences: 17(9) |
| PREDICTED: tubulin beta-4 chain-like isoform 1 [Gorilla gorilla gorilla]        |              |            |                |                  |
| <a href="#">gi1426363734</a>                                                    | Mass: 49229  | Score: 940 | Matches: 25(9) | Sequences: 17(9) |
| PREDICTED: tubulin beta-4 chain-like isoform 2 [Gorilla gorilla gorilla]        |              |            |                |                  |
| <a href="#">gi1431899052</a>                                                    | Mass: 68142  | Score: 940 | Matches: 25(9) | Sequences: 17(9) |
| Tubulin beta-2C chain [Pteropus alecto]                                         |              |            |                |                  |



## Supporting Information

[gi|82213656](#) Mass: 41724 Score: 1243 Matches: 34(15) Sequences: 23(12)  
RecName: Full-Actin, cytoplasmic 2; AltName: Full-Gamma-actin; Contains: RecName: Full-Actin, cytoplasmic 2, N-terminally processed

[gi|118419977](#) Mass: 40552 Score: 1243 Matches: 34(15) Sequences: 23(12)  
beta-actin, partial [Subalaena glacialis]

[gi|126272476](#) Mass: 41827 Score: 1243 Matches: 34(15) Sequences: 23(12)  
PREDICTED: actin, cytoplasmic type 5-like [Monodelphis domestica]

[gi|146386601](#) Mass: 41718 Score: 1243 Matches: 34(15) Sequences: 23(12)  
Chain A, Structure Of Oxidized Beta-Actin

[gi|148231177](#) Mass: 41740 Score: 1243 Matches: 34(15) Sequences: 23(12)  
actin, cytoplasmic 1 [Xenopus laevis]

[gi|148744172](#) Mass: 41690 Score: 1243 Matches: 34(15) Sequences: 23(12)  
Actin, beta [Bos taurus]

[gi|151176139](#) Mass: 41711 Score: 1243 Matches: 34(15) Sequences: 23(12)  
beta-actin [Anas platyrhynchos]

[gi|168177284](#) Mass: 41579 Score: 1243 Matches: 34(15) Sequences: 23(12)  
Chain A, Model Of Actin-Fimbrin Abd2 Complex

[gi|197099682](#) Mass: 41709 Score: 1243 Matches: 34(15) Sequences: 23(12)  
actin, cytoplasmic 1 [Pongo abelii]

[gi|207298859](#) Mass: 41809 Score: 1243 Matches: 34(15) Sequences: 23(12)  
beta-actin [Acipenser transmontanus]

[gi|224061779](#) Mass: 41825 Score: 1243 Matches: 34(15) Sequences: 23(12)  
PREDICTED: actin, cytoplasmic type 5-like [Taeniopygia guttata]

[gi|288541396](#) Mass: 41823 Score: 1243 Matches: 34(15) Sequences: 23(12)  
actin, cytoplasmic type 5 [Xenopus laevis]

[gi|293342999](#) Mass: 41767 Score: 1243 Matches: 34(15) Sequences: 23(12)  
PREDICTED: actin, cytoplasmic 2-like [Rattus norvegicus]

[gi|297273827](#) Mass: 41744 Score: 1243 Matches: 34(15) Sequences: 23(12)  
PREDICTED: actin, cytoplasmic 2-like isoform 4 [Macaca mulatta]

[gi|301762186](#) Mass: 41720 Score: 1243 Matches: 34(15) Sequences: 23(12)  
PREDICTED: actin, cytoplasmic 1-like [Alluropoda melanoleuca]

[gi|301792411](#) Mass: 68102 Score: 1243 Matches: 34(15) Sequences: 23(12)  
PREDICTED: actin, cytoplasmic 2-like [Alluropoda melanoleuca]

[gi|307938303](#) Mass: 41740 Score: 1243 Matches: 34(15) Sequences: 23(12)  
actin, cytoplasmic 1 [Canis lupus familiaris]

[gi|313507212](#) Mass: 41664 Score: 1243 Matches: 34(15) Sequences: 23(12)  
Chain A, The Structure Of Crystalline Profilin-Beta-Actin

[gi|343960006](#) Mass: 41634 Score: 1243 Matches: 34(15) Sequences: 23(12)  
actin, cytoplasmic 1 [Pan troglodytes]

[gi|344289654](#) Mass: 42429 Score: 1243 Matches: 34(15) Sequences: 23(12)  
PREDICTED: actin, cytoplasmic 1-like [Loxodonta africana]

[gi|347360906](#) Mass: 41711 Score: 1243 Matches: 34(15) Sequences: 23(12)  
actin, cytoplasmic 1 [Cricetulus griseus]

[gi|390459127](#) Mass: 41708 Score: 1243 Matches: 34(15) Sequences: 23(12)  
PREDICTED: actin, cytoplasmic 1 isoform 1 [Callithrix jacchus]

[gi|395501273](#) Mass: 41925 Score: 1243 Matches: 34(15) Sequences: 23(12)  
PREDICTED: actin, cytoplasmic type 5-like [Sarcophilus harrisii]

[gi|395845536](#) Mass: 41709 Score: 1243 Matches: 34(15) Sequences: 23(12)  
PREDICTED: actin, cytoplasmic 1 [Otolemur garnettii]

[gi|397479373](#) Mass: 68315 Score: 1243 Matches: 34(15) Sequences: 23(12)  
PREDICTED: actin, cytoplasmic 1-like [Pan paniscus]

[gi|407726065](#) Mass: 41971 Score: 1243 Matches: 34(15) Sequences: 23(12)  
beta actin [Cynops pyrrhogaster]

[gi|410984335](#) Mass: 49757 Score: 1243 Matches: 34(15) Sequences: 23(12)  
PREDICTED: actin, cytoplasmic 2-like [Felis catus]

[gi|431908661](#) Mass: 41750 Score: 1243 Matches: 34(15) Sequences: 23(12)  
Actin, cytoplasmic 2 [Pteropus alecto]

[gi|432119092](#) Mass: 41707 Score: 1243 Matches: 34(15) Sequences: 23(12)  
Actin, cytoplasmic 2 [Myotis davidii]



## Supporting Information

[gi1512872359](#) Mass: 49785 Score: 940 Matches: 25(9) Sequences: 17(9)  
 PREDICTED: tubulin beta-4B chain isoform X1 [Heterocephalus glaber]

5. [gi17106439](#) Mass: 49639 Score: 909 Matches: 26(9) Sequences: 16(9) eMFAI: 1.16

tubulin beta-5 chain [Mus musculus]

| Query                | Observed         | Mr(expt)         | Mr(calc)         | ppm          | Miss     | Score       | Expect          | Rank     | Unique | Peptide                                               |
|----------------------|------------------|------------------|------------------|--------------|----------|-------------|-----------------|----------|--------|-------------------------------------------------------|
| <a href="#">665</a>  | 514.7631         | 1027.5116        | 1027.5121        | -0.41        | 0        | 42          | 0.17            | 1        |        | K.TAVCDIPFR.G <a href="#">664</a> <a href="#">566</a> |
| <a href="#">684</a>  | 520.3006         | 1038.5866        | 1038.5862        | 0.42         | 0        | 63          | 0.00061         | 1        |        | R.YLTVAAVFR.G                                         |
| <a href="#">942</a>  | 572.3214         | 1142.6282        | 1142.6270        | 1.07         | 0        | (36)        | 1.2             | 1        |        | K.LAVNIVVFFR.L                                        |
| <a href="#">988</a>  | 580.3186         | 1158.6226        | 1158.6219        | 0.60         | 0        | 62          | 0.0031          | 1        |        | K.LAVNIVVFFR.L                                        |
| <a href="#">1265</a> | 626.8622         | 1251.7098        | 1251.7098        | 0.85         | 1        | 25          | 3.7             | 1        |        | R.YLTVAAVFRG.H                                        |
| <a href="#">1734</a> | 731.8458         | 1461.6770        | 1461.6769        | 0.07         | 0        | 71          | 0.00021         | 1        |        | K.EVDGQMLIVQNK.N                                      |
| <a href="#">1994</a> | <b>808.4222</b>  | <b>1614.8298</b> | <b>1614.8287</b> | <b>0.71</b>  | <b>0</b> | <b>(48)</b> | <b>0.059</b>    | <b>1</b> |        | R.AILVDLEPGTMSV.R.S                                   |
| <a href="#">2000</a> | 540.9503         | 1619.8291        | 1619.8283        | 0.50         | 0        | (28)        | 7.8             | 1        |        | R.LHFFMFGFAPLTSR.G                                    |
| <a href="#">2001</a> | 810.9221         | 1619.8296        | 1619.8283        | 0.86         | 0        | 38          | 0.65            | 1        |        | R.LHFFMFGFAPLTSR.G                                    |
| <a href="#">2022</a> | <b>816.4194</b>  | <b>1630.8242</b> | <b>1630.8236</b> | <b>0.38</b>  | <b>0</b> | <b>76</b>   | <b>9.1e-005</b> | <b>1</b> |        | R.AILVDLEPGTMSV.R.S                                   |
| <a href="#">2029</a> | 546.2820         | 1635.8242        | 1635.8232        | 0.61         | 0        | (34)        | 2.2             | 1        |        | R.LHFFMFGFAPLTSR.G                                    |
| <a href="#">2030</a> | 818.9205         | 1635.8264        | 1635.8232        | 2.00         | 0        | (29)        | 5.3             | 1        |        | R.LHFFMFGFAPLTSR.G                                    |
| <a href="#">2079</a> | <b>830.4523</b>  | <b>1658.8900</b> | <b>1658.8879</b> | <b>1.27</b>  | <b>0</b> | <b>44</b>   | <b>0.13</b>     | <b>1</b> |        | R.ALTVPQLQQVVDAR.N <a href="#">2080</a>               |
| <a href="#">2144</a> | 848.9205         | 1695.8264        | 1695.8257        | 0.47         | 0        | 46          | 0.12            | 1        |        | K.HSYFVENIINIVK.T                                     |
| <a href="#">2409</a> | <b>943.4889</b>  | <b>1884.9632</b> | <b>1884.9655</b> | <b>-1.21</b> | <b>0</b> | <b>95</b>   | <b>1e-006</b>   | <b>1</b> |        | K.HAVTFIGNSTAIQELFK.R                                 |
| <a href="#">2500</a> | 653.6655         | 1957.9747        | 1957.9745        | 0.07         | 0        | (33)        | 2.2             | 1        |        | K.GHYTEGAEIVDSVLDVVR.K                                |
| <a href="#">2501</a> | 979.9952         | 1957.9758        | 1957.9745        | 0.67         | 0        | 102         | 3e-007          | 1        |        | K.GHYTEGAEIVDSVLDVVR.K                                |
| <a href="#">2513</a> | 657.9659         | 1970.8759        | 1970.8747        | 0.58         | 1        | 54          | 0.0079          | 1        |        | R.HSRKIVDQQLIVQNK.N                                   |
| <a href="#">2580</a> | <b>1021.5410</b> | <b>2041.0674</b> | <b>2041.0666</b> | <b>0.40</b>  | <b>1</b> | <b>(34)</b> | <b>1.3</b>      | <b>1</b> |        | K.HAVTFIGNSTAIQELFK.I                                 |
| <a href="#">2581</a> | <b>681.3633</b>  | <b>2041.0681</b> | <b>2041.0666</b> | <b>0.70</b>  | <b>1</b> | <b>36</b>   | <b>0.66</b>     | <b>1</b> |        | K.HAVTFIGNSTAIQELFK.I                                 |
| <a href="#">2617</a> | 696.3635         | 2086.0687        | 2086.0695        | -0.39        | 1        | 33          | 1.9             | 1        |        | K.GHYTEGAEIVDSVLDVVR.K.E                              |
| <a href="#">2652</a> | <b>913.4367</b>  | <b>2737.2883</b> | <b>2737.2874</b> | <b>0.34</b>  | <b>1</b> | <b>47</b>   | <b>0.06</b>     | <b>1</b> |        | R.ALTVPQLQQVVDAR.HSAACDPR.H                           |
| <a href="#">2912</a> | 1109.8470        | 3326.5192        | 3326.5218        | -0.78        | 0        | 75          | 6.4e-005        | 1        |        | K.SAERDCLQGFQLTSLGGTSGMCTLLISK.I                      |

Proteins matching the same set of peptides:

|                                                               |             |            |                |                  |
|---------------------------------------------------------------|-------------|------------|----------------|------------------|
| <a href="#">gi12846758</a>                                    | Mass: 49608 | Score: 909 | Matches: 26(9) | Sequences: 16(9) |
| unnamed protein product [Mus musculus]                        |             |            |                |                  |
| <a href="#">gi155742495</a>                                   | Mass: 49696 | Score: 909 | Matches: 26(9) | Sequences: 16(9) |
| tubulin beta chain [Xenopus (Silurana) tropicalis]            |             |            |                |                  |
| <a href="#">gi174141821</a>                                   | Mass: 49667 | Score: 909 | Matches: 26(9) | Sequences: 16(9) |
| unnamed protein product [Mus musculus]                        |             |            |                |                  |
| <a href="#">gi174204140</a>                                   | Mass: 49616 | Score: 909 | Matches: 26(9) | Sequences: 16(9) |
| unnamed protein product [Mus musculus]                        |             |            |                |                  |
| <a href="#">gi1148691289</a>                                  | Mass: 49910 | Score: 909 | Matches: 26(9) | Sequences: 16(9) |
| tubulin, beta 5 [Mus musculus]                                |             |            |                |                  |
| <a href="#">gi1221045918</a>                                  | Mass: 46537 | Score: 909 | Matches: 26(9) | Sequences: 16(9) |
| unnamed protein product [Homo sapiens]                        |             |            |                |                  |
| <a href="#">gi1291395962</a>                                  | Mass: 49695 | Score: 909 | Matches: 26(9) | Sequences: 16(9) |
| PREDICTED: tubulin, beta 5-like [Oryctolagus cuniculus]       |             |            |                |                  |
| <a href="#">gi1332245916</a>                                  | Mass: 53454 | Score: 909 | Matches: 26(9) | Sequences: 16(9) |
| PREDICTED: tubulin beta chain isoform 3 [Nomascus leucogenys] |             |            |                |                  |
| <a href="#">gi1332245918</a>                                  | Mass: 44790 | Score: 909 | Matches: 26(9) | Sequences: 16(9) |
| PREDICTED: tubulin beta chain isoform 4 [Nomascus leucogenys] |             |            |                |                  |
| <a href="#">gi1346644703</a>                                  | Mass: 49710 | Score: 909 | Matches: 26(9) | Sequences: 16(9) |
| beta tubulin [Cricetulus griseus]                             |             |            |                |                  |
| <a href="#">gi1355561503</a>                                  | Mass: 49540 | Score: 909 | Matches: 26(9) | Sequences: 16(9) |
| Tubulin beta-5 chain [Macaca mulatta]                         |             |            |                |                  |
| <a href="#">gi1410958666</a>                                  | Mass: 50209 | Score: 909 | Matches: 26(9) | Sequences: 16(9) |
| PREDICTED: tubulin beta chain isoform 2 [Felis catus]         |             |            |                |                  |
| <a href="#">gi1426250622</a>                                  | Mass: 50494 | Score: 909 | Matches: 26(9) | Sequences: 16(9) |
| PREDICTED: tubulin beta-5 chain isoform 2 [Ovis aries]        |             |            |                |                  |
| <a href="#">gi1426352283</a>                                  | Mass: 50452 | Score: 909 | Matches: 26(9) | Sequences: 16(9) |

## Supporting Information

PREDICTED: tubulin beta chain isoform 4 [Gorilla gorilla gorilla]  
[gi1441594011](#) Mass: 50221 Score: 909 Matches: 26(9) Sequences: 16(9)  
 PREDICTED: tubulin beta chain [Nomascus leucogenys]  
[gi1449266665](#) Mass: 44488 Score: 909 Matches: 26(9) Sequences: 16(9)  
 Tubulin beta-7 chain [Columba livia]  
[gi1470614409](#) Mass: 48145 Score: 909 Matches: 26(9) Sequences: 16(9)  
 PREDICTED: tubulin beta chain-like [Tursiops truncatus]  
[gi1471417858](#) Mass: 50538 Score: 909 Matches: 26(9) Sequences: 16(9)  
 PREDICTED: tubulin beta chain isoform 1 [Trichechus manatus latirostris]  
[gi1478500263](#) Mass: 50453 Score: 909 Matches: 26(9) Sequences: 16(9)  
 PREDICTED: tubulin beta chain isoform 1 [Ceratotherium simum simum]  
[gi1488527589](#) Mass: 53861 Score: 909 Matches: 26(9) Sequences: 16(9)  
 PREDICTED: LOW QUALITY PROTEIN: tubulin beta chain [Dasypus novemcinctus]  
[gi1507576830](#) Mass: 50731 Score: 909 Matches: 26(9) Sequences: 16(9)  
 PREDICTED: tubulin beta-5 chain-like isoform X1 [Jaculus jaculus]  
[gi1511925004](#) Mass: 51418 Score: 909 Matches: 26(9) Sequences: 16(9)  
 PREDICTED: tubulin beta chain isoform X1 [Mustela putorius furo]  
[gi1511925006](#) Mass: 49679 Score: 909 Matches: 26(9) Sequences: 16(9)  
 PREDICTED: tubulin beta chain isoform X2 [Mustela putorius furo]  
[gi1511925008](#) Mass: 49994 Score: 909 Matches: 26(9) Sequences: 16(9)  
 PREDICTED: tubulin beta chain isoform X3 [Mustela putorius furo]  
[gi1512969935](#) Mass: 56137 Score: 909 Matches: 26(9) Sequences: 16(9)  
 PREDICTED: tubulin beta-5 chain-like isoform X1 [Heterocephalus glaber]  
[gi1512969937](#) Mass: 50169 Score: 909 Matches: 26(9) Sequences: 16(9)  
 PREDICTED: tubulin beta-5 chain-like isoform X2 [Heterocephalus glaber]  
[gi1524975670](#) Mass: 50222 Score: 909 Matches: 26(9) Sequences: 16(9)  
 PREDICTED: tubulin beta-5 chain-like isoform X2 [Mesocricetus auratus]  
[gi1529003647](#) Mass: 50484 Score: 909 Matches: 26(9) Sequences: 16(9)  
 PREDICTED: tubulin beta-5 chain isoform X1 [Bos taurus]  
[gi1530565654](#) Mass: 50502 Score: 909 Matches: 26(9) Sequences: 16(9)  
 PREDICTED: tubulin beta chain isoform X1 [Chrysemys picta bellii]  
[gi1532056203](#) Mass: 49923 Score: 909 Matches: 26(9) Sequences: 16(9)  
 PREDICTED: tubulin beta-5 chain-like isoform X2 [Microtus ochrogaster]  
[gi1532112832](#) Mass: 50494 Score: 909 Matches: 26(9) Sequences: 16(9)  
 PREDICTED: tubulin beta-5 chain-like isoform X1 [Ictidomys tridecemlineatus]  
[gi1544429285](#) Mass: 49830 Score: 909 Matches: 26(9) Sequences: 16(9)  
 PREDICTED: tubulin beta chain isoform X1 [Macaca fascicularis]  
[gi1545838336](#) Mass: 50549 Score: 909 Matches: 26(9) Sequences: 16(9)  
 PREDICTED: tubulin beta chain isoform X1 [Sus scrofa]  
[gi1545838339](#) Mass: 50383 Score: 909 Matches: 26(9) Sequences: 16(9)  
 PREDICTED: tubulin beta chain isoform X2 [Sus scrofa]

---

6. [gi116579885](#) Mass: 47667 Score: 905 Matches: 25(8) Sequences: 21(8) eMFI: 1.55  
 60S ribosomal protein L4 [Homo sapiens]

| Query                | Observed | Mr(expt)  | Mr(calc)  | ppm   | Miss | Score | Expect  | Rank | Unique | Peptide        |
|----------------------|----------|-----------|-----------|-------|------|-------|---------|------|--------|----------------|
| <a href="#">146</a>  | 385.2685 | 768.5224  | 768.5221  | 0.40  | 1    | 39    | 0.044   | 1    |        | K.KPLVGEK.A    |
| <a href="#">321</a>  | 432.2458 | 862.4770  | 862.4773  | -0.34 | 0    | 43    | 0.19    | 1    |        | K.LAPGGHVR.F   |
| <a href="#">405</a>  | 457.3077 | 912.6008  | 912.6008  | 0.09  | 1    | 48    | 0.013   | 1    |        | K.EAVLLLEK.L   |
| <a href="#">476</a>  | 478.7800 | 955.5454  | 955.5450  | 0.44  | 0    | 70    | 0.00041 | 1    | U      | K.AAAAAALQAK.S |
| <a href="#">499</a>  | 483.2398 | 964.4650  | 964.4648  | 0.29  | 0    | 41    | 0.45    | 1    |        | K.HINTDLSR.I   |
| <a href="#">529</a>  | 488.2592 | 974.5038  | 974.5032  | 0.61  | 1    | 45    | 0.16    | 2    | U      | K.SDEKAAVAGK.K |
| <a href="#">627</a>  | 507.8322 | 1013.6498 | 1013.6485 | 1.38  | 1    | 50    | 0.0056  | 1    |        | K.TEAVLLLEK.E  |
| <a href="#">880</a>  | 560.2666 | 1118.5186 | 1118.5179 | 0.71  | 0    | 26    | 6.6     | 1    |        | K.SNYNLPDQK.M  |
| <a href="#">969</a>  | 577.2950 | 1152.5754 | 1152.5750 | 0.39  | 1    | 30    | 4.7     | 1    |        | R.HFAPTKTWR.R  |
| <a href="#">1084</a> | 400.5593 | 1198.6561 | 1198.6557 | 0.30  | 1    | (31)  | 2.8     | 1    |        | K.KPTTEKKPAA.- |
| <a href="#">1085</a> | 600.3354 | 1198.6562 | 1198.6557 | 0.44  | 1    | 32    | 2.1     | 1    |        | K.KPTTEKKPAA.- |
| <a href="#">1088</a> | 600.7481 | 1199.4816 | 1199.4812 | 0.39  | 0    | 37    | 0.09    | 1    |        | R.SQQAFGNCR.G  |
| <a href="#">1111</a> | 603.8489 | 1205.6832 | 1205.6842 | -0.77 | 1    | 40    | 0.17    | 2    |        | R.IMLKINPYAK.T |



## Supporting Information

|                      |          |           |           |       |   |      |          |   |                                         |
|----------------------|----------|-----------|-----------|-------|---|------|----------|---|-----------------------------------------|
| <a href="#">1112</a> | 402.9022 | 1205.6848 | 1205.6842 | 0.50  | 1 | (23) | 8.8      | 4 | R. <a href="#">IMLKINPYAK.T</a>         |
| <a href="#">1312</a> | 634.8826 | 1267.7506 | 1267.7500 | 0.54  | 0 | 25   | 3.8      | 1 | R. <a href="#">NIPGITLLNVRK.L</a>       |
| <a href="#">1400</a> | 649.8751 | 1297.7356 | 1297.7354 | 0.23  | 1 | 76   | 8.2e-005 | 1 | U R. <a href="#">VDSKAAAAAALQAK.S</a>   |
| <a href="#">1578</a> | 693.3853 | 1384.7560 | 1384.7561 | -0.07 | 1 | 36   | 0.71     | 1 | K. <a href="#">KPAEKKPTTEK.K</a>        |
| <a href="#">2048</a> | 548.3262 | 1641.9568 | 1641.9566 | 0.10  | 1 | 45   | 0.014    | 1 | K. <a href="#">APRNIPGITLLNVRK.L</a>    |
| <a href="#">2234</a> | 881.4507 | 1760.8868 | 1760.8879 | -0.61 | 1 | 56   | 0.01     | 1 | R. <a href="#">RQPCIIYHEDNGIIR.A</a>    |
| <a href="#">2235</a> | 587.9700 | 1760.8882 | 1760.8879 | 0.14  | 1 | (39) | 0.5      | 1 | R. <a href="#">RQPCIIYHEDNGIIR.A</a>    |
| <a href="#">2365</a> | 925.5781 | 1849.1416 | 1849.1400 | 0.88  | 1 | 58   | 8.8e-005 | 1 | R. <a href="#">NIPGITLLNVRKINILK.L</a>  |
| <a href="#">2379</a> | 621.3518 | 1861.0336 | 1861.0322 | 0.71  | 0 | 34   | 0.42     | 1 | K. <a href="#">APIRQDIVRFVHTLNR.K</a>   |
| <a href="#">2474</a> | 969.0154 | 1936.0162 | 1936.0161 | 0.05  | 0 | 39   | 0.36     | 1 | R. <a href="#">YAIQSALAAALPALVMSK.G</a> |
| <a href="#">2490</a> | 977.0132 | 1952.0118 | 1952.0111 | 0.40  | 0 | (37) | 0.72     | 2 | R. <a href="#">YAIQSALAAALPALVMSK.G</a> |
| <a href="#">2528</a> | 664.0493 | 1989.1261 | 1989.1272 | -0.57 | 1 | 34   | 0.24     | 1 | K. <a href="#">APIRQDIVRFVHTLNR.K</a>   |

### Proteins matching the same set of peptides:

|                                                    |             |            |                |                  |
|----------------------------------------------------|-------------|------------|----------------|------------------|
| <a href="#">gi 62087534</a>                        | Mass: 48965 | Score: 905 | Matches: 25(8) | Sequences: 21(8) |
| ribosomal protein L4 variant [Homo sapiens]        |             |            |                |                  |
| <a href="#">gi 119598180</a>                       | Mass: 52910 | Score: 905 | Matches: 25(8) | Sequences: 21(8) |
| ribosomal protein L4, isoform CRA_b [Homo sapiens] |             |            |                |                  |
| <a href="#">gi 197097764</a>                       | Mass: 47637 | Score: 905 | Matches: 25(8) | Sequences: 21(8) |
| 60S ribosomal protein L4 [Pongo abelii]            |             |            |                |                  |
| <a href="#">gi 208965460</a>                       | Mass: 47614 | Score: 905 | Matches: 25(8) | Sequences: 21(8) |
| ribosomal protein L4 [synthetic construct]         |             |            |                |                  |

|                                         |                           |             |            |                 |                  |             |          |      |        |                                                    |
|-----------------------------------------|---------------------------|-------------|------------|-----------------|------------------|-------------|----------|------|--------|----------------------------------------------------|
| 7.                                      | <a href="#">gi 306891</a> | Mass: 83242 | Score: 888 | Matches: 23(12) | Sequences: 17(8) | anPAI: 0.78 |          |      |        |                                                    |
| 90kDa heat shock protein [Homo sapiens] |                           |             |            |                 |                  |             |          |      |        |                                                    |
| Query                                   | Observed                  | Mr(expt)    | Mr(calc)   | ppm             | Miss             | Score       | Expect   | Rank | Unique | Peptide                                            |
| <a href="#">320</a>                     | 432.2184                  | 862.4222    | 862.4218   | 0.49            | 0                | 43          | 0.3      | 1    | 1      | R. <a href="#">RMLQQSK.I</a>                       |
| <a href="#">372</a>                     | 446.2162                  | 890.4178    | 890.4174   | 0.50            | 0                | 31          | 2.4      | 1    | 1      | K. <a href="#">PTEAFSK.W</a>                       |
| <a href="#">644</a>                     | 510.3038                  | 1018.5930   | 1018.5923  | 0.70            | 1                | 38          | 0.39     | 1    | 1      | K. <a href="#">NRIKLYR.R</a>                       |
| <a href="#">963</a>                     | 576.2828                  | 1150.5510   | 1150.5506  | 0.40            | 0                | 54          | 0.017    | 1    | 1      | K. <a href="#">YIDQKLNK.T</a>                      |
| <a href="#">1206</a>                    | 618.8226                  | 1235.6306   | 1235.6299  | 0.64            | 1                | 36          | 1.1      | 1    | 1      | R. <a href="#">RDPDLENK.K</a>                      |
| <a href="#">1232</a>                    | 621.8565                  | 1241.6984   | 1241.6979  | 0.42            | 0                | 51          | 0.027    | 2    | 1      | K. <a href="#">ADLNNLGTIAK.S</a>                   |
| <a href="#">1510</a>                    | 675.3713                  | 1348.7280   | 1348.7272  | 0.61            | 0                | (69)        | 0.00033  | 1    | 1      | R. <a href="#">TLTLVDTGIGMK.A</a>                  |
| <a href="#">1540</a>                    | 683.3686                  | 1364.7226   | 1364.7221  | 0.37            | 0                | 83          | 1.4e-005 | 1    | 1      | R. <a href="#">TLTLVDTGIGMK.A 1541</a>             |
| <a href="#">1623</a>                    | 704.8525                  | 1407.6904   | 1407.6881  | 1.65            | 1                | 37          | 0.86     | 1    | 1      | K. <a href="#">EKYIDQKLNK.T</a>                    |
| <a href="#">2266</a>                    | 594.9883                  | 1781.9431   | 1781.9424  | 0.37            | 0                | 36          | 0.58     | 1    | 1      | K. <a href="#">ELEINPDRPIVETLR.Q</a>               |
| <a href="#">2306</a>                    | 603.6578                  | 1807.9516   | 1807.9509  | 0.40            | 0                | 33          | 1.6      | 1    | 1      | K. <a href="#">RSQFIGYPTITLYEK.E</a>               |
| <a href="#">2307</a>                    | 904.9844                  | 1807.9542   | 1807.9509  | 1.88            | 0                | (25)        | 9.1      | 1    | 1      | K. <a href="#">RSQFIGYPTITLYEK.E</a>               |
| <a href="#">2360</a>                    | 924.4020                  | 1846.7894   | 1846.7897  | -0.15           | 0                | 80          | 1.2e-005 | 1    | 1      | R. <a href="#">NPDQITQEEYGEFYK.S</a>               |
| <a href="#">2553</a>                    | 672.3533                  | 2014.0381   | 2014.0371  | 0.49            | 1                | 56          | 0.0098   | 1    | 1      | K. <a href="#">VILHLKEDQTEYLEKR.R</a>              |
| <a href="#">2626</a>                    | 698.7061                  | 2093.0945   | 2093.0945  | 0.92            | 1                | 29          | 3.5      | 1    | 1      | K. <a href="#">RSQFIGYPTITLYEKER.E</a>             |
| <a href="#">2738</a>                    | 792.0697                  | 2373.1873   | 2373.1846  | 1.14            | 1                | 33          | 1.8      | 1    | 1      | R. <a href="#">GVVDSDELPLNISRMLQQSK.I</a>          |
| <a href="#">2744</a>                    | 797.7335                  | 2390.1787   | 2390.1754  | 1.38            | 1                | (51)        | 0.028    | 1    | 1      | K. <a href="#">SIYYITGESKEQVANSAPVER.V</a>         |
| <a href="#">2745</a>                    | 1196.0980                 | 2390.1814   | 2390.1754  | 2.54            | 1                | 100         | 4.2e-007 | 1    | 1      | K. <a href="#">SIYYITGESKEQVANSAPVER.V</a>         |
| <a href="#">2765</a>                    | 1224.5520                 | 2447.0894   | 2447.0920  | -1.03           | 0                | 90          | 1.8e-006 | 1    | 1      | R. <a href="#">LVSSPQIVTSTYGTANRER.I</a>           |
| <a href="#">2814</a>                    | 858.4796                  | 2572.4170   | 2572.4146  | 0.93            | 1                | 57          | 0.0018   | 1    | 1      | R. <a href="#">TLTLVDTGIGMTRADLNNLGTIAK.S</a>      |
| <a href="#">2819</a>                    | 863.8112                  | 2588.4118   | 2588.4095  | 0.88            | 1                | (50)        | 0.012    | 1    | 1      | R. <a href="#">TLTLVDTGIGMTRADLNNLGTIAK.S 2818</a> |

### Proteins matching the same set of peptides:

|                                                         |             |            |                 |                  |
|---------------------------------------------------------|-------------|------------|-----------------|------------------|
| <a href="#">gi 6807647</a>                              | Mass: 84790 | Score: 888 | Matches: 23(12) | Sequences: 17(8) |
| hypothetical protein [Homo sapiens]                     |             |            |                 |                  |
| <a href="#">gi 12082134</a>                             | Mass: 81912 | Score: 888 | Matches: 23(12) | Sequences: 17(8) |
| heat shock protein 90 beta [Equus caballus]             |             |            |                 |                  |
| <a href="#">gi 20149594</a>                             | Mass: 83212 | Score: 888 | Matches: 23(12) | Sequences: 17(8) |
| heat shock protein HSP 90-beta isoform a [Homo sapiens] |             |            |                 |                  |
| <a href="#">gi 39644662</a>                             | Mass: 74746 | Score: 888 | Matches: 23(12) | Sequences: 17(8) |
| HSP90AB1 protein [Homo sapiens]                         |             |            |                 |                  |

## Supporting Information

[gi|40556608](#) Mass: 83229 Score: 888 Matches: 23(12) Sequences: 17(8)  
heat shock protein HSP 90-beta [Mus musculus]

[gi|51859516](#) Mass: 83289 Score: 888 Matches: 23(12) Sequences: 17(8)  
Heat shock protein 90kDa alpha (cytosolic), class B member 1 [Rattus norvegicus]

[gi|74147026](#) Mass: 83171 Score: 888 Matches: 23(12) Sequences: 17(8)  
unnamed protein product [Mus musculus]

[gi|90075818](#) Mass: 83113 Score: 888 Matches: 23(12) Sequences: 17(8)  
unnamed protein product [Macaca fascicularis]

[gi|91234898](#) Mass: 83230 Score: 888 Matches: 23(12) Sequences: 17(8)  
84 kDa heat shock protein [Rattus norvegicus]

[gi|126352614](#) Mass: 83185 Score: 888 Matches: 23(12) Sequences: 17(8)  
heat shock protein HSP 90-beta [Equus caballus]

[gi|194378142](#) Mass: 82119 Score: 888 Matches: 23(12) Sequences: 17(8)  
unnamed protein product [Homo sapiens]

[gi|194386896](#) Mass: 79145 Score: 888 Matches: 23(12) Sequences: 17(8)  
unnamed protein product [Homo sapiens]

[gi|197100267](#) Mass: 83186 Score: 888 Matches: 23(12) Sequences: 17(8)  
heat shock protein HSP 90-beta [Pongo abelii]

[gi|291396282](#) Mass: 83415 Score: 888 Matches: 23(12) Sequences: 17(8)  
PREDICTED: heat shock 90kDa protein 1, beta [Oryctolagus cuniculus]

[gi|346986428](#) Mass: 83201 Score: 888 Matches: 23(12) Sequences: 17(8)  
heat shock 90kD protein 1, beta [Sus scrofa]

[gi|397526725](#) Mass: 82242 Score: 888 Matches: 23(12) Sequences: 17(8)  
PREDICTED: heat shock cognate protein HSP 90-beta-like isoform 2 [Pan paniscus]

[gi|410959298](#) Mass: 83215 Score: 888 Matches: 23(12) Sequences: 17(8)  
PREDICTED: heat shock protein HSP 90-beta [Felis catus]

[gi|431822408](#) Mass: 82269 Score: 888 Matches: 23(12) Sequences: 17(8)  
heat shock protein HSP 90-beta isoform c [Homo sapiens]

[gi|431838325](#) Mass: 84145 Score: 888 Matches: 23(12) Sequences: 17(8)  
Heat shock protein HSP 90-beta [Pteropus alecto]

[gi|444725038](#) Mass: 89569 Score: 888 Matches: 23(12) Sequences: 17(8)  
Heat shock protein HSP 90-beta [Tupaia chinensis]

[gi|478499606](#) Mass: 84161 Score: 888 Matches: 23(12) Sequences: 17(8)  
PREDICTED: heat shock protein HSP 90-beta isoform 1 [Ceratotherium simum simum]

[gi|478499608](#) Mass: 83245 Score: 888 Matches: 23(12) Sequences: 17(8)  
PREDICTED: heat shock protein HSP 90-beta isoform 2 [Ceratotherium simum simum]

[gi|504157887](#) Mass: 83245 Score: 888 Matches: 23(12) Sequences: 17(8)  
PREDICTED: heat shock protein HSP 90-beta isoform X1 [Ochotona princeps]

[gi|504157889](#) Mass: 82302 Score: 888 Matches: 23(12) Sequences: 17(8)  
PREDICTED: heat shock protein HSP 90-beta isoform X2 [Ochotona princeps]

[gi|505791410](#) Mass: 83215 Score: 888 Matches: 23(12) Sequences: 17(8)  
PREDICTED: heat shock protein HSP 90-beta isoform X1 [Sorex araneus]

[gi|505791413](#) Mass: 82272 Score: 888 Matches: 23(12) Sequences: 17(8)  
PREDICTED: heat shock protein HSP 90-beta isoform X2 [Sorex araneus]

[gi|507924642](#) Mass: 83243 Score: 888 Matches: 23(12) Sequences: 17(8)  
PREDICTED: heat shock protein HSP 90-beta isoform X1 [Condylura cristata]

[gi|507924644](#) Mass: 83322 Score: 888 Matches: 23(12) Sequences: 17(8)  
PREDICTED: heat shock protein HSP 90-beta isoform X2 [Condylura cristata]

[gi|524941111](#) Mass: 83261 Score: 888 Matches: 23(12) Sequences: 17(8)  
PREDICTED: heat shock protein HSP 90-beta isoform X1 [Mesocricetus auratus]

[gi|524941115](#) Mass: 82318 Score: 888 Matches: 23(12) Sequences: 17(8)  
PREDICTED: heat shock protein HSP 90-beta isoform X2 [Mesocricetus auratus]

[gi|525343687](#) Mass: 83095 Score: 888 Matches: 23(12) Sequences: 17(8)  
heat shock protein 90kDa alpha (cytosolic), class B member 1 [Pan troglodytes]

[gi|532033960](#) Mass: 83157 Score: 888 Matches: 23(12) Sequences: 17(8)  
PREDICTED: heat shock protein HSP 90-beta isoform X1 [Microtus ochrogaster]

[gi|532065639](#) Mass: 83289 Score: 888 Matches: 23(12) Sequences: 17(8)  
PREDICTED: heat shock protein HSP 90-beta [Ictidomys tridecemlineatus]

### Supporting Information

```
gi|537261579    Mass: 80464    Score: 888    Matches: 23(12)    Sequences: 17(8)
heat shock protein HSP 90-beta-like protein [Cricetulus griseus]
gi|542162148    Mass: 84773    Score: 888    Matches: 23(12)    Sequences: 17(8)
PREDICTED: heat shock protein HSP 90-beta [Lonotrichia albicollis]
gi|544427662    Mass: 87537    Score: 888    Matches: 23(12)    Sequences: 17(8)
PREDICTED: uncharacterized LOC101926380 isoform X1 [Macaca fascicularis]
gi|545519269    Mass: 84340    Score: 888    Matches: 23(12)    Sequences: 17(8)
PREDICTED: heat shock protein HSP 90-beta isoform X2 [Canis lupus familiaris]
```

**Supplemental Figure S9:** LC/MS/MS sequencing results from compound **1**\_TagII lysate pulldown in HCT-116 cell lysates.

## List of abbreviations

|                    |                                                                               |
|--------------------|-------------------------------------------------------------------------------|
| $\mu\text{M}$      | Micromolar                                                                    |
| CTC                | Chlorotriyl chloride                                                          |
| nM                 | Nanomolar                                                                     |
| HOAt               | 1-Hydroxybenzotriazole                                                        |
| HOBt               | 1-Hydroxybenzotriazole                                                        |
| DIC                | <i>N,N'</i> -Diisopropylcarbodiimide                                          |
| Fmoc               | 9-Fluorenylmethyl chloroformate                                               |
| IPA                | Isopropyl alcohol                                                             |
| TFE                | 2,2,2-Trifluoroethanol                                                        |
| v/v                | Volume to volume                                                              |
| $^{\circ}\text{C}$ | Degree Celcius                                                                |
| Boc                | <i>tert</i> -butoxycarbonyl                                                   |
| TBTU               | O-(Benzotriazol-1-yl)- <i>N,N,N',N'</i> -tetramethyluronium tetrafluoroborate |
| HATU               | 2-(1H-7-Azabenzotriazol-1-yl)-1,1,3,3-tetramethyluronium hexafluorophosphate  |
| DMTMM              | 4-(4,6-Dimethoxy-1,3,5-triazin-2-yl)-4-methylmorpholin-4-ium chloride         |
| DIPEA              | <i>N,N</i> -Diisopropylethylamine                                             |
| TFA                | Trifluoroacetic acid                                                          |
| PEG                | Polyethylene glycol                                                           |
| Lys                | Lysine                                                                        |
| Phe                | Phenylalanine                                                                 |
| Tyr                | Tyrosine                                                                      |
| Trp                | Tryptophan                                                                    |
| Val                | Valine                                                                        |
| DDLp               | Double deprotected linear pentapeptide                                        |
